# Supplementary material for: Association of Potentially Damaging De Novo Gene Variants With Neurologic Outcomes in Congenital Heart Disease
Source: PubMed Central journal article supplement (PMC9880793; doi:10.1001/jamanetworkopen.2022.53191), 2023-01-26
Supplement: jamanetwopen-e2253191-s001.pdf [file jamanetwopen-e2253191-s001.pdf]

## Supplementary Online Content

Morton SU, Norris-Brilliant A, Cunningham S, et al. Association of potentially damaging de novo gene variants with neurologic outcomes in congenital heart disease. *JAMA Netw Open*. 2023;6(1):e2253191. doi:10.1001/jamanetworkopen.2022.53191

**eTable 1.** Ad Hoc Gene Lists

**eTable 2.** Gene Variants

**eTable 3.** Neurodevelopmental Tests

**eTable 4.** Full Results for Neurodevelopmental Outcomes by Case-Control Status

**eTable 5.** Brain MRI Findings by Case-Control Status

**eTable 6.** MRI Differences by Case-Control Status and Post Hoc Analysis

**eTable 7.** Neurodevelopmental Outcomes in Post Hoc Analysis

**eFigure 1.** Patient Enrollment Flow Diagram

**eFigure 2.** Venn Diagram of Shared Genes Between the 4 Gene Lists Used in the Ad Hoc Analysis

**eMethods.**

| eTable 1: ad hoc gene lists |           |                |           |
|-----------------------------|-----------|----------------|-----------|
| Chromatin Modifying Genes   | HBE Genes | High pLI Genes | NDD Genes |
| ACTB                        | AAAS      | MARCH5         | ABCB7     |
| ACTL6A                      | AACS      | MARCH6         | ABCD1     |
| ACTL6B                      | AAGAB     | MARCH7         | ACSL4     |
| ACTR6                       | AAMP      | MARCH9         | ACTB      |
| ACTR8                       | AAR2      | SEPT5          | ACTG1     |
| AEBP2                       | AARS      | SEPT6          | ACTL6B    |
| AICDA                       | AARSD1    | SEPT7          | ADAR      |
| ANP32E                      | ABCA2     | SEPT9          | ADNP      |
| AOF1                        | ABCD3     | SEPT11         | AFF2      |
| APBB1                       | ABCE1     | AAK1           | AFF3      |
| APITD1                      | ABCF1     | AAMP           | AFF4      |
| APOBEC1                     | ABCF2     | ABCA2          | AFG3L2    |
| ARID1A                      | ABCG2     | ABCB7          | AGTR2     |
| ARID1B                      | ABHD12    | ABCD1          | AHDC1     |
| ARID2                       | ABHD17A   | ABCE1          | AIFM1     |
| ARID4A                      | ABHD17B   | ABHD13         | ALDH18A1  |
| ARID4B                      | ABHD17C   | ABHD17C        | ALG13     |
| ARID5A                      | ABHD4     | ABHD2          | ANK2      |
| ARRB1                       | ABI1      | ABHD8          | ANKH      |
| ASF1A                       | ABI2      | ABI1           | ANKRD11   |
| ASF1B                       | ABL1      | ABL1           | AP1S2     |
| ASH1L                       | ABLIM1    | ABLIM1         | AP2S1     |
| ASH2L                       | ACACA     | ABR            | AR        |
| ASXL1                       | ACAD9     | AC005358.1     | ARCN1     |
| ASXL2                       | ACAP3     | AC006486.9     | ARHGEF6   |
| ATF2                        | ACAT2     | AC007952.5     | ARHGEF9   |
| ATM                         | ACBD3     | AC073610.5     | ARID1A    |
| ATRX                        | ACIN1     | AC104534.3     | ARID1B    |
| ATXN7                       | ACLY      | AC117834.1     | ARID2     |
| ATXN7L3                     | ACO1      | ACACA          | ARSE      |
| AURKA                       | ACO2      | ACAN           | ARX       |
| AURKB                       | ACOT7     | ACAP2          | ASH1L     |
| AURKC                       | ACP1      | ACE2           | ASXL1     |
| BABAM1                      | ACSL3     | ACER3          | ASXL2     |
| BAG6                        | ACSL4     | ACHE           | ASXL3     |
| BAHCC1                      | ACTB      | ACIN1          | ATAD3A    |
| BAHD1                       | ACTG1     | ACOT7          | ATP1A3    |
| BANP                        | ACTL6A    | ACRC           | ATP6AP2   |
| BAP1                        | ACTN1     | ACSL4          | ATP6V1B2  |
| BAP18                       | ACTN4     | ACTA2          | ATP7A     |
| BAZ1A                       | ACTR1A    | ACTB           | ATRX      |
| BAZ1B                       | ACTR1B    | ACTC1          | AUTS2     |
| BAZ2A                       | ACTR2     | ACTL6A         | BAZ2B     |
| BCOR                        | ACTR3     | ACTN1          | BCAP31    |
| BCORL1                      | ACTR8     | ACTN2          | BCKDK     |
| BHMG1                       | ACVR1B    | ACTN4          | BCL11A    |
| BM1                         | ACVR2B    | ACTR1A         | BHLHA9    |
| BPTF                        | ADAM10    | ACTR2          | BMP2      |

|           |         |             |          |
|-----------|---------|-------------|----------|
| BRCA1     | ADAM17  | ACTR3       | BPIFB6   |
| BRCA2     | ADAMTS9 | ACTR3B      | BPTF     |
| BRCC3     | ADAR    | ACVR1B      | BRAF     |
| BRD1      | ADCY6   | ACVR2A      | BRPF1    |
| BRD2      | ADD1    | ACVR2B      | BRWD3    |
| BRD3      | ADD3    | ADAM10      | CACNA1A  |
| BRD4      | ADH5    | ADAM17      | CACNA1D  |
| BRD7      | ADI1    | ADAM23      | CACNA1E  |
| BRD8      | ADIPOR1 | ADAMTS1     | CACNA1H  |
| BRD9      | ADIPOR2 | ADAMTS10    | CACNA2D3 |
| BRDT      | ADNP    | ADAMTS2     | CACNB4   |
| BRE       | ADNP2   | ADAMTS6     | CAD      |
| BRMS1     | ADO     | ADAP1       | CAMK2A   |
| BRMS1L    | ADPRH   | ADARB1      | CAMK2B   |
| BRPF1     | ADPRHL2 | ADARB2      | CAMTA1   |
| BRPF3     | ADRBK1  | ADCY1       | CAPRIN1  |
| C11orf30  | ADRM1   | ADCY2       | CASK     |
| C14orf169 | ADSL    | ADCY5       | CBL      |
| C17orf49  | ADSS    | ADCY9       | CCDC22   |
| CABIN1    | AEBP2   | ADCYAP1     | CCDC88A  |
| CAMK2D    | AEN     | ADD1        | CCND2    |
| CARM1     | AES     | ADD2        | CD96     |
| CASC5     | AFF4    | ADD3        | CDH15    |
| CBX2      | AGAP1   | ADIPOR1     | CDK13    |
| CBX3      | AGAP3   | ADNP        | CDK16    |
| CBX4      | AGAP4   | ADNP2       | CDKL5    |
| CBX6      | AGAP5   | ADORA2A     | CDON     |
| CBX7      | AGAP6   | ADRA2C      | CELF4    |
| CBX8      | AGAP7   | ADRB2       | CHAMP1   |
| CCDC101   | AGAP8   | ADRBK1      | CHD2     |
| CCNB1     | AGFG1   | ADRBK2      | CHD4     |
| CDC73     | AGGF1   | ADRM1       | CHD7     |
| CDK1      | AGO1    | AEBP2       | CHD8     |
| CDK2      | AGO2    | AES         | CHRNA2   |
| CDK9      | AGO3    | AF196779.12 | CHRNA4   |
| CDKN2A    | AGPAT1  | AFF1        | CHRN2    |
| CDY1      | AGPAT6  | AFF2        | CIC      |
| CDY1B     | AGPS    | AFF3        | CLCN4    |
| CDY2A     | AGRN    | AFF4        | CLIC2    |
| CDY2B     | AGTPBP1 | AFTPH       | CLTC     |
| CDYL      | AHCTF1  | AGAP1       | CNKS2    |
| CECR2     | AHCYL1  | AGAP2       | CNOT3    |
| CENPA     | AHDC1   | AGAP3       | CNTN4    |
| CENPC     | AHSA1   | AGFG1       | CNTNAP2  |
| CENPH     | AHSA2   | AGO1        | COL4A1   |
| CENPI     | AIF1L   | AGO2        | COL4A2   |
| CENPK     | AIMP1   | AGO3        | COL4A3BP |
| CENPL     | AIMP2   | AGO4        | COL6A1   |
| CENPM     | AJUBA   | AGPAT1      | CORO1A   |
| CENPN     | AK2     | AGPAT3      | CREBBP   |
| CENPO     | AK3     | AGPS        | CSNK1G1  |

|                |          |                 |         |
|----------------|----------|-----------------|---------|
| CENPP          | AKAP1    | AHCTF1          | CSNK2A1 |
| CENPQ          | AKAP12   | AHCYL1          | CTCF    |
| CENPR          | AKAP2    | AHCYL2          | CTNNB1  |
| CENPT          | AKAP8    | AHDC1           | CTNND2  |
| CENPU          | AKAP8L   | AHNAK           | CUL3    |
| CENPV          | AKIRIN2  | AHR             | CUL4B   |
| CENPW          | AKR1A1   | AHSA1           | CUX1    |
| CHD1           | AKR7A2   | AIFM1           | DCX     |
| CHD1L          | AKR7A3   | AJAP1           | DDX3X   |
| CHD2           | AKT1     | AJUBA           | DEAF1   |
| CHD3           | AKT3     | AKAP1           | DEPDC5  |
| CHD4           | ALAD     | AKAP11          | DHDDS   |
| CHD5           | ALDH16A1 | AKAP13          | DHX30   |
| CHD6           | ALDH18A1 | AKAP14          | DIP2A   |
| CHD7           | ALDH1A3  | AKAP17A         | DIP2B   |
| CHD8           | ALDH2    | AKAP4           | DIP2C   |
| CHD9           | ALDH7A1  | AKAP5           | DKC1    |
| CHEK1          | ALDH9A1  | AKAP6           | DLG3    |
| CHRA1          | ALDOA    | AKAP8           | DLG4    |
| CLOCK          | ALG10    | AKIRIN1         | DLL4    |
| COPRS          | ALG10B   | AKIRIN2         | DMD     |
| CPA4           | ALG2     | AKT1            | DNM1    |
| CREBBP         | ALG3     | AKT2            | DNMT3A  |
| CRTC2          | ALKBH1   | AKT3            | DPYSL2  |
| CSRP2BP        | ALKBH5   | ALAS2           | DSCAM   |
| CTBP1          | ALS2     | ALB             | DYNC1H1 |
| CTCF           | ALX3     | ALCAM           | DYRK1A  |
| CTCF1          | ALX4     | ALDH1A1         | EBF3    |
| CTD-2132N18.3  | ALYREF   | ALG13           | EBP     |
| CTNNB1         | AMBRA1   | ALKBH5          | EED     |
| CTR9           | AMD1     | ALYREF          | EEF1A2  |
| CUL4B          | AMFR     | AMBRA1          | EFTUD2  |
| CXXC1          | AMMECR1L | AMD1            | EHMT1   |
| DAPK3          | AMOT     | AMER1           | EIF2S3  |
| DAXX           | AMOTL1   | AMER3           | EIF3G   |
| DDB1           | AMOTL2   | AMIGO1          | ELAVL3  |
| DDB2           | AMPD2    | AMIGO2          | EMC1    |
| DEK            | AMT      | AMMECR1         | EMX2    |
| DKFZp686C08112 | ANAPC1   | AMMECR1L        | EP300   |
| DMAP1          | ANAPC16  | AMOT            | EPB41L1 |
| DMRTC2         | ANAPC2   | ANAPC1          | ERBIN   |
| DNAJC2         | ANAPC4   | ANAPC2          | ERMARD  |
| DNMT1          | ANAPC5   | ANAPC7          | EZH2    |
| DNMT3A         | ANAPC7   | ANGPT1          | FAM111A |
| DNMT3B         | ANKFY1   | ANGPT2          | FBXO11  |
| DOT1L          | ANKHD1   | ANK1            | FBXO25  |
| DPF3           | ANKLE2   | ANK2            | FGF12   |
| DPPA2          | ANKRD10  | ANK3            | FGFR1   |
| DPPA3          | ANKRD11  | ANKFY1          | FLNA    |
| DPY30          | ANKRD13A | ANKHD1          | FMR1    |
| DR1            | ANKRD13B | ANKHD1-EIF4EBP3 | FOXG1   |

|          |             |            |          |
|----------|-------------|------------|----------|
| DTX3L    | ANKRD17     | ANKIB1     | FOXP1    |
| EDF1     | ANKRD27     | ANKRD11    | FOXP2    |
| EED      | ANKRD28     | ANKRD12    | FOXP3    |
| EHMT1    | ANKRD40     | ANKRD13C   | FRMD7    |
| EHMT2    | ANKRD52     | ANKRD17    | FRMPD4   |
| EID1     | ANKRD6      | ANKRD28    | FTSJ1    |
| ELK4     | ANLN        | ANKRD34A   | FZD5     |
| ELP3     | ANO6        | ANKRD46    | GABBR2   |
| ELP4     | ANP32A      | ANKRD50    | GABRA1   |
| EMSY     | ANP32B      | ANKRD52    | GABRB2   |
| ENY2     | ANP32D      | ANKS1A     | GABRB3   |
| EP300    | ANP32E      | ANKS1B     | GABRG2   |
| EP400    | ANXA5       | ANO1       | GATAD2B  |
| EPC1     | ANXA6       | ANO8       | GCH1     |
| EPC2     | AP000304.12 | ANP32A     | GDI1     |
| ESR1     | AP1AR       | ANP32B     | GFAP     |
| EYA1     | AP1B1       | ANP32E     | GIGYF1   |
| EYA2     | AP1G1       | ANTXR1     | GIGYF2   |
| EYA3     | AP1M1       | AP000783.1 | GJC2     |
| EYA4     | AP1S1       | AP1B1      | GLI2     |
| EZH1     | AP1S3       | AP1G1      | GLI3     |
| EZH2     | AP2A1       | AP1M1      | GMNN     |
| FAM175A  | AP2A2       | AP1S2      | GNAI1    |
| FBL      | AP2B1       | AP2A1      | GNAO1    |
| FLCN     | AP2M1       | AP2A2      | GNAS     |
| FOXA1    | AP2S1       | AP2B1      | GNB1     |
| FOXA2    | AP3B1       | AP2M1      | GRIA1    |
| FOXA3    | AP3D1       | AP2S1      | GRIA2    |
| FOXP3    | AP3S1       | AP3B1      | GRIA3    |
| FSHR     | AP3S2       | AP3B2      | GRIN1    |
| GATA2    | AP4M1       | AP3D1      | GRIN2A   |
| GATA3    | APBA2       | APBA1      | GRIN2B   |
| GATAD2B  | APBB1       | APBA2      | GRIN2D   |
| GCG      | APCDD1      | APBB1      | GRIP1    |
| GFI1B    | APEH        | APBB1IP    | GSPT2    |
| GSG2     | APEX1       | APC        | HCFC1    |
| GTF3C4   | API5        | APC2       | HCN1     |
| H2AFY    | APLP1       | APEX2      | HDAC4    |
| H2AFY2   | APLP2       | APH1A      | HDAC8    |
| H4_HUMAN | APMAP       | API5       | HDLBP    |
| HAT1     | APP         | APLNR      | HECTD4   |
| HCFC1    | APPBP2      | APOO       | HECW2    |
| HDAC1    | APRT        | APPBP2     | HESX1    |
| HDAC10   | AQR         | APPL1      | HIST1H1E |
| HDAC11   | ARAF        | AQR        | HIST1H4C |
| HDAC2    | ARCN1       | AR         | HIVEP2   |
| HDAC3    | ARF1        | ARAF       | HMGB3    |
| HDAC4    | ARF3        | ARC        | HNRNPH2  |
| HDAC5    | ARF4        | ARCN1      | HNRNPU   |
| HDAC6    | ARF5        | ARF1       | HPD      |
| HDAC7    | ARF6        | ARF4       | HPRT1    |

|           |           |          |           |
|-----------|-----------|----------|-----------|
| HDAC8     | ARFGAP1   | ARF5     | HRAS      |
| HDAC9     | ARFGAP2   | ARF6     | HSD17B10  |
| HELLS     | ARFRP1    | ARFGEF1  | HUWE1     |
| HILS1     | ARGLU1    | ARFGEF2  | IDS       |
| HIPK4     | ARHGAP1   | ARFIP2   | IFIH1     |
| HIRA      | ARHGAP11B | ARGLU1   | IGBP1     |
| HIST1H1B  | ARHGAP19  | ARHGAP1  | IL1RAPL1  |
| HIST1H2BA | ARHGAP21  | ARHGAP21 | ILF2      |
| HIST1H4A  | ARHGAP23  | ARHGAP23 | INTS6     |
| HIST1H4B  | ARHGAP28  | ARHGAP25 | IQSEC2    |
| HIST1H4C  | ARHGAP29  | ARHGAP26 | IRF2BPL   |
| HIST1H4D  | ARHGAP31  | ARHGAP29 | ITPR1     |
| HIST1H4E  | ARHGAP33  | ARHGAP30 | KANSL1    |
| HIST1H4F  | ARHGAP35  | ARHGAP31 | KAT2B     |
| HIST1H4H  | ARHGAP39  | ARHGAP32 | KAT6A     |
| HIST1H4I  | ARHGDI A  | ARHGAP35 | KAT6B     |
| HIST1H4J  | ARHGEF1   | ARHGAP36 | KATNAL2   |
| HIST1H4K  | ARHGEF10  | ARHGAP4  | KCNA2     |
| HIST1H4L  | ARHGEF17  | ARHGAP42 | KCNB1     |
| HIST2H4A  | ARHGEF2   | ARHGAP44 | KCNC1     |
| HIST2H4B  | ARHGEF25  | ARHGAP5  | KCNC3     |
| HIST4H4   | ARHGEF40  | ARHGAP6  | KCNH1     |
| HJURP     | ARHGEF7   | ARHGDIG  | KCNH5     |
| HLCS      | ARID1A    | ARHGEF1  | KCNJ11    |
| HLTF      | ARID2     | ARHGEF11 | KCNJ6     |
| HMG20A    | ARID3A    | ARHGEF12 | KCNMA1    |
| HMG20B    | ARID3B    | ARHGEF17 | KCNQ2     |
| HMGA1     | ARIH1     | ARHGEF2  | KCNQ3     |
| HMGA2     | ARL1      | ARHGEF6  | KCNQ5     |
| HMGB1     | ARL10     | ARHGEF7  | KCNT1     |
| HMGB2     | ARL2      | ARHGEF9  | KDM1A     |
| HMGB3     | ARL2BP    | ARID1A   | KDM5B     |
| HMGB4     | ARL3      | ARID1B   | KDM5C     |
| HMG N3    | ARL5A     | ARID2    | KDM6A     |
| HMG N5    | ARL5B     | ARID3A   | KDM6B     |
| HMGXB4    | ARL6IP1   | ARID4A   | KIAA0232  |
| HNF1A     | ARL6IP4   | ARID4B   | KIDINS220 |
| HNRNPC    | ARL6IP6   | ARID5A   | KIF11     |
| HOPX      | ARL8A     | ARID5B   | KIF1A     |
| HR        | ARL8B     | ARIH1    | KIF2A     |
| HSF4      | ARMC1     | ARIH2    | KIF4A     |
| HUWE1     | ARMCX2    | ARL4A    | KIF5C     |
| IKZF1     | ARNT      | ARL4C    | KIRREL3   |
| IL1B      | ARNT2     | ARL8A    | KITLG     |
| ING1      | ARPC1A    | ARMC1    | KLF8      |
| ING2      | ARPC2     | ARMC8    | KLHL15    |
| ING3      | ARPC3     | ARMCX2   | KMT2A     |
| ING4      | ARPC4     | ARMCX4   | KMT2B     |
| ING5      | ARPC5     | ARNT     | KMT2C     |
| INO80     | ARPC5L    | ARNT2    | KMT2D     |
| INO80B    | ARPP19    | ARNTL    | KMT2E     |

|             |         |         |         |
|-------------|---------|---------|---------|
| INO80B-WBP1 | ARRB1   | ARPC1A  | KMT5B   |
| INO80C      | ARV1    | ARPC2   | KPNA7   |
| IRF4        | ARVCF   | ARPC4   | KRAS    |
| ITGB3BP     | ASAP1   | ARPC5   | KRIT1   |
| IWS1        | ASAP2   | ARPC5L  | L1CAM   |
| JADE1       | ASB6    | ARPP19  | LAS1L   |
| JADE2       | ASCC2   | ARRB1   | LDB1    |
| JADE3       | ASF1B   | ARRB2   | LEO1    |
| JAK2        | ASH2L   | ARRDC3  | LGI1    |
| JARID1C     | ASIP    | ARSE    | LRP2    |
| JARID2      | ASNA1   | ARX     | LRRC4C  |
| JDP2        | ASNS    | ASAP1   | MAB21L2 |
| JMJD1C      | ASNSD1  | ASAP2   | MAF     |
| JMJD6       | ASPSCR1 | ASB7    | MAGEL2  |
| K7ERQ8      | ASUN    | ASB9    | MAGI2   |
| KANSL1      | ASXL1   | ASCL1   | MAGT1   |
| KANSL2      | ATAD1   | ASF1A   | MAOA    |
| KANSL3      | ATAD2   | ASH1L   | MAP1A   |
| KAT2A       | ATAD3A  | ASH2L   | MAP2K1  |
| KAT2B       | ATAD3B  | ASIC1   | MAP2K2  |
| KAT5        | ATAD3C  | ASIC2   | MAPK10  |
| KAT6A       | ATAT1   | ASNA1   | MBD5    |
| KAT6B       | ATF1    | ASTN1   | MBOAT7  |
| KAT7        | ATF2    | ASTN2   | MECP2   |
| KAT8        | ATF4    | ASUN    | MED12   |
| KDM1A       | ATF6B   | ASXL2   | MED13   |
| KDM1B       | ATF7IP  | ASXL3   | MED13L  |
| KDM2A       | ATG12   | ATAD2   | MEF2C   |
| KDM2B       | ATG2A   | ATAD2B  | MET     |
| KDM3A       | ATG4B   | ATAD5   | MID1    |
| KDM3B       | ATIC    | ATCAY   | MKX     |
| KDM4A       | ATN1    | ATF1    | MORC2   |
| KDM4B       | ATP11A  | ATF2    | MSL3    |
| KDM4C       | ATP13A1 | ATF7    | MSNP1AS |
| KDM4D       | ATP13A2 | ATF7IP  | MTF1    |
| KDM4E       | ATP13A3 | ATG13   | MTOR    |
| KDM5A       | ATP1A1  | ATG16L1 | MYCN    |
| KDM5B       | ATP1B3  | ATG4A   | MYH10   |
| KDM5C       | ATP2A2  | ATG4B   | MYT1L   |
| KDM5D       | ATP2B1  | ATG5    | NAA10   |
| KDM6A       | ATP2C1  | ATG9A   | NAA15   |
| KDM6B       | ATP5A1  | ATL1    | NACC1   |
| KDM7A       | ATP5B   | ATN1    | NALCN   |
| KDM8        | ATP5C1  | ATOH8   | NCAPD2  |
| KLF1        | ATP5D   | ATOX1   | NCAPD3  |
| KMT2A       | ATP5G1  | ATP11C  | NCKAP1  |
| KMT2B       | ATP5G2  | ATP13A1 | NCOA1   |
| KMT2C       | ATP5G3  | ATP13A3 | NDP     |
| KMT2D       | ATP5H   | ATP1A1  | NDUFA1  |
| KMT2E       | ATP5J   | ATP1A3  | NEDD4L  |
| L3MBTL1     | ATP5J2  | ATP1B1  | NEXMIF  |

|             |          |          |          |
|-------------|----------|----------|----------|
| L3MBTL2     | ATP5O    | ATP2A2   | NF1      |
| L3MBTL3     | ATP6AP1  | ATP2B1   | NFIA     |
| L3MBTL4     | ATP6V0B  | ATP2B2   | NFIX     |
| LDB1        | ATP6V0C  | ATP2B3   | NIPBL    |
| LEF1        | ATP6V0D1 | ATP2C1   | NKX2-1   |
| LEO1        | ATP6V1A  | ATP5A1   | NLGN3    |
| LIF         | ATP6V1B2 | ATP5B    | NLGN4X   |
| LOXL2       | ATP6V1E1 | ATP6AP1  | NLRP5    |
| LPIN1       | ATP8B2   | ATP6AP2  | NONO     |
| LRWD1       | ATPIF1   | ATP6V0A1 | NR1I3    |
| M18BP       | ATR      | ATP6V0B  | NR2F1    |
| M18BP_HUMAN | ATRIP    | ATP6V0C  | NR3C2    |
| MAP3K12     | ATRX     | ATP6V0D1 | NRAS     |
| MAP3K7      | ATXN10   | ATP6V1A  | NRXN1    |
| MAPK3       | ATXN1L   | ATP6V1B2 | NRXN2    |
| MAPK8       | ATXN2    | ATP6V1E1 | NRXN3    |
| MBD2        | ATXN2L   | ATP7A    | NSD1     |
| MBD3        | ATXN7L3  | ATP9A    | NTRK2    |
| MBIP        | ATXN7L3B | ATRN     | NUP155   |
| MBTD1       | AUP1     | ATRNL1   | NUS1     |
| MCRS1       | AURKA    | ATRX     | OCRL     |
| MEAF6       | AURKAIP1 | ATXN1    | OFD1     |
| MECP2       | AURKB    | ATXN1L   | OPHN1    |
| MED24       | AVL9     | ATXN2    | OTC      |
| MEN1        | AXIN1    | ATXN2L   | OTX2     |
| METTL8      | AXIN2    | ATXN7    | P4HB     |
| MGEA5       | AZI1     | ATXN7L1  | PACS1    |
| MIS18A      | AZIN1    | ATXN7L2  | PACS2    |
| MIS18BP1    | B3GALNT2 | ATXN7L3  | PAFAH1B1 |
| MLL2        | B3GNT5   | AURKA    | PAK3     |
| MORF4L1     | B4GALNT4 | AUTS2    | PAX5     |
| MORF4L2     | B4GALT2  | AVPR2    | PAX6     |
| MRGBP       | B4GALT3  | AXIN2    | PAX8     |
| MS18A_HUMAN | B9D1     | AZIN1    | PCDH19   |
| MS18B_HUMAN | BABAM1   | B2M      | PCGF2    |
| MSL1        | BACE1    | B3GALT2  | PDCD10   |
| MSL2        | BACH1    | B3GNT2   | PDE10A   |
| MSL3        | BAG1     | B3GNT3   | PDGFRB   |
| MSL3P1      | BAG2     | B3GNT5   | PDHA1    |
| MT3         | BAG6     | B3GNT7   | PGK1     |
| MTA2        | BAK1     | B4GALT5  | PHF12    |
| MTF2        | BANF1    | B4GALT6  | PHF2     |
| MUC1        | BAP1     | BABAM1   | PHF21A   |
| MYB         | BASP1    | BACE1    | PHF3     |
| MYC         | BAX      | BACH1    | PHF6     |
| MYOCD       | BAZ1B    | BACH2    | PHF8     |
| MYOD1       | BAZ2A    | BAG3     | PHIP     |
| MYSM1       | BBX      | BAG6     | PHOX2B   |
| NAA50       | BCAM     | BAHD1    | PIGA     |
| NAA60       | BCAP31   | BAI1     | PIH1D3   |
| NACC2       | BCAR1    | BAI2     | PIK3R2   |



|           |         |         |         |
|-----------|---------|---------|---------|
| NAP1L2    | BCAS2   | BAI3    | PLP1    |
| NASP      | BCAT1   | BANF1   | POGZ    |
| NCOA1     | BCCIP   | BANP    | PPM1D   |
| NCOA2     | BCKDK   | BAP1    | PPP1CB  |
| NCOA3     | BCL2L13 | BARHL2  | PPP1R9B |
| NCOR1     | BCL7B   | BARX1   | PPP2R1A |
| NEK11     | BCL7C   | BASP1   | PPP2R5D |
| NIPBL     | BCL9    | BATF    | PPP3CA  |
| NO66      | BCL9L   | BATF2   | PPP5C   |
| NOC2L     | BCLAF1  | BAZ1A   | PQBP1   |
| NOS1      | BCOR    | BAZ1B   | PRKD1   |
| NPM       | BCR     | BAZ2A   | PRR12   |
| NPM_HUMAN | BDP1    | BAZ2B   | PRRT2   |
| NPM1      | BECN1   | BBX     | PSMD12  |
| NPM2      | BEND3   | BCAR1   | PTCH1   |
| NR3C1     | BEX1    | BCAR3   | PTCHD1  |
| NSD1      | BEX2    | BCL11A  | PTDSS1  |
| OGT       | BGN     | BCL11B  | PTEN    |
| OIP5      | BICD2   | BCL2    | PTK7    |
| OTUB1     | BIN1    | BCL2L1  | PUF60   |
| PADI2     | BIRC5   | BCL2L11 | PURA    |
| PADI4     | BLCAP   | BCL3    | QKI     |
| PAF1      | BLM     | BCL6    | QRICH1  |
| PAX5      | BLMH    | BCL9L   | RAB11A  |
| PAX7      | BLOC1S6 | BCOR    | RAB11B  |
| PAXBP1    | BMI1    | BCORL1  | RAB39B  |
| PAXIP1    | BMP7    | BCR     | RAC1    |
| PBRM1     | BMPR1A  | BDNF    | RAD21   |
| PCGF1     | BMS1    | BECN1   | RAD51   |
| PCGF2     | BNIP2   | BEGAIN  | RAF1    |
| PER1      | BNIP3L  | BEND3   | RAI1    |
| PER2      | BOC     | BEND4   | RANBP17 |
| PHB       | BOLA2   | BEX1    | RANBP2  |
| PHC1      | BOLA2B  | BEX4    | RARB    |
| PHF1      | BOP1    | BHLHE22 | RBM10   |
| PHF13     | BORA    | BHLHE40 | RELN    |
| PHF19     | BPTF    | BHLHE41 | RERE    |
| PHF2      | BRAP    | BICC1   | RFX3    |
| PHF20     | BRD1    | BICD2   | RIMS1   |
| PHF21A    | BRD2    | BIN1    | RLIM    |
| PHF8      | BRD3    | BIRC6   | RNF113A |
| PIM3      | BRD4    | BLCAP   | ROR2    |
| PKN1      | BRD7    | BLNK    | RORB    |
| PML       | BRD8    | BMI1    | RPL11   |
| POGZ      | BRF1    | BMP10   | RPS23   |
| POLE3     | BRICD5  | BMP2    | RPS6KA3 |
| POLE4     | BRIX1   | BMP4    | RRAS    |
| POU5F1    | BRK1    | BMP6    | RYR3    |
| PPARGC1A  | BRMS1L  | BMPR1A  | SAMD9L  |
| PPM1F     | BRPF1   | BMPR1B  | SATB1   |
| PPP5C     | BRPF3   | BMPR2   | SATB2   |

|             |           |           |         |
|-------------|-----------|-----------|---------|
| PRDM13      | BRWD1     | BNC1      | SCN1A   |
| PRDM14      | BSG       | BNC2      | SCN1B   |
| PRDM2       | BTAF1     | BOD1L1    | SCN2A   |
| PRDM5       | BTBD2     | BPTF      | SCN3A   |
| PRDM6       | BTBD9     | BRAF      | SCN8A   |
| PRDM7       | BTF3      | BRD1      | SCN9A   |
| PRDM8       | BTRC      | BRD2      | SCRIB   |
| PRDM9       | BUB1      | BRD3      | SET     |
| PRKAA1      | BUB1B     | BRD4      | SETBP1  |
| PRKAA2      | BUB3      | BRD7      | SETD1A  |
| PRKCA       | BUD31     | BRINP1    | SETD5   |
| PRKCB       | BYSL      | BRINP2    | SHANK1  |
| PRKD1       | BZW1      | BRIX1     | SHANK2  |
| PRKD2       | BZW2      | BRK1      | SHANK3  |
| PRMT1       | C10orf76  | BRPF1     | SHH     |
| PRMT2       | C11orf24  | BRPF3     | SIK1    |
| PRMT3       | C11orf30  | BRS3      | SIN3A   |
| PRMT5       | C11orf31  | BRSK1     | SIX3    |
| PRMT6       | C11orf49  | BRSK2     | SKI     |
| PRMT7       | C11orf58  | BRWD1     | SLC12A5 |
| PRMT8       | C11orf68  | BRWD3     | SLC16A2 |
| PSME4       | C11orf73  | BSN       | SLC1A2  |
| PYGO2       | C11orf95  | BTAF1     | SLC25A4 |
| RAG1        | C12orf10  | BTBD11    | SLC2A1  |
| RAG2        | C12orf43  | BTBD18    | SLC35A2 |
| RB1         | C12orf45  | BTBD2     | SLC6A1  |
| RBBP4       | C12orf57  | BTF3      | SLC6A8  |
| RBBP4_HUMAN | C14orf1   | BTF3L4    | SLC9A6  |
| RBBP5       | C14orf166 | BTG1      | SLC9A9  |
| RBBP7       | C14orf2   | BTG3      | SMARCA2 |
| RBBP7_HUMAN | C14orf37  | BTK       | SMARCA4 |
| RBL1        | C16orf72  | BUB3      | SMARCB1 |
| RBL2        | C16orf80  | BZW1      | SMARCC2 |
| RBM14       | C17orf103 | C10orf12  | SMARCE1 |
| RCBTB1      | C17orf70  | C10orf53  | SMC1A   |
| RCOR1       | C17orf96  | C10orf54  | SMC3    |
| RERE        | C18orf25  | C11orf30  | SMS     |
| REST        | C18orf32  | C11orf73  | SNAP25  |
| RING1       | C19orf10  | C11orf84  | SNRPB   |
| RNF168      | C19orf43  | C12orf44  | SNX3    |
| RNF2        | C19orf52  | C12orf5   | SON     |
| RNF20       | C19orf53  | C12orf75  | SOS1    |
| RNF40       | C1orf112  | C14orf2   | SOX11   |
| RNF8        | C1orf159  | C16orf70  | SOX2    |
| RPS6KA4     | C1orf198  | C16orf72  | SOX3    |
| RPS6KA5     | C1orf21   | C17orf103 | SOX5    |
| RRP8        | C1orf63   | C17orf104 | SPAST   |
| RSF1        | C1orf85   | C17orf85  | SPTAN1  |
| RSF1_HUMAN  | C1QBP     | C18orf25  | SRCAP   |
| RTF1        | C20orf27  | C18orf8   | SRGAP3  |
| RUVB1_HUMAN | C2CD3     | C19orf33  | SRP54   |

|             |                |             |          |
|-------------|----------------|-------------|----------|
| RUVBL1      | C2CD5          | C19orf68    | SRPR     |
| RUVBL2      | C2orf15        | C1GALT1     | SRPX2    |
| RYBP        | C3orf58        | C1GALT1C1   | SRSF11   |
| SALL1       | C3orf70        | C1orf21     | STAG1    |
| SAP130      | C4orf27        | C1orf226    | STX1B    |
| SATB1       | C4orf29        | C1orf51     | STXBP1   |
| SATB2       | C5orf15        | C1orf86     | SUV420H1 |
| SCMH1       | C5orf24        | C1QL3       | SYN1     |
| SET         | C5orf51        | C1QTNF1-AS1 | SYNGAP1  |
| SETD1A      | C6orf106       | C1QTNF5     | SYP      |
| SETD1B      | C6orf62        | C1R         | SYT1     |
| SETD2       | C7orf26        | C20orf112   | TAF1     |
| SETD3       | C7orf55-LUC7L2 | C20orf24    | TAOK1    |
| SETD7       | C8orf37        | C20orf78    | TAOK2    |
| SETD8       | C8orf76        | C2CD2L      | TAZ      |
| SETDB1      | C9orf114       | C2orf82     | TBL1XR1  |
| SETDB2      | C9orf3         | C3          | TBR1     |
| SETMAR      | C9orf78        | C4B         | TBX1     |
| SFMBT1      | C9orf85        | C4orf32     | TBX18    |
| SFPQ        | C9orf91        | C4orf48     | TCF20    |
| SIN3A       | CA14           | C5orf24     | TCF4     |
| SIN3B       | CA2            | C6orf1      | TCF7L2   |
| SIRT1       | CA4            | C6orf106    | TEK      |
| SIRT2       | CAB39          | C6orf136    | TGIF1    |
| SIRT3       | CABIN1         | C6orf62     | THAP1    |
| SIRT6       | CACFD1         | C7orf26     | THOC2    |
| SIRT7       | CACHD1         | C7orf60     | THRA     |
| SKI         | CACNA2D2       | C7orf73     | TIMM8A   |
| SKP1        | CACNB3         | C9orf147    | TINF2    |
| SMAD4       | CACNG4         | C9orf172    | TLK2     |
| SMARCA1     | CACNG7         | CA10        | TM4SF20  |
| SMARCA2     | CACTIN         | CAAP1       | TM9SF4   |
| SMARCA4     | CACUL1         | CABP1       | TNRC6B   |
| SMARCA5     | CACYBP         | CACNA1A     | TRAF7    |
| SMARCA1     | CAD            | CACNA1B     | TRIM23   |
| SMARCA1     | CADM1          | CACNA1C     | TRIO     |
| SMARCB1     | CALD1          | CACNA1D     | TRIP12   |
| SMARCC1     | CALM1          | CACNA1E     | TSC1     |
| SMARCC2     | CALM3          | CACNA1G     | TSC2     |
| SMARCD1     | CALR           | CACNA1I     | TSPAN7   |
| SMARCD2     | CALU           | CACNA2D1    | TUBA1A   |
| SMARCD3     | CAMK2G         | CACNA2D2    | TUBB     |
| SMARCE1     | CAMSAP1        | CACNA2D3    | TUBB2A   |
| SMCA5       | CAND1          | CACNB1      | TUBB2B   |
| SMCA5_HUMAN | CAND2          | CACNG2      | TUBB3    |
| SMYD1       | CANT1          | CACNG3      | TUBB4A   |
| SMYD2       | CANX           | CACNG7      | TUBG1    |
| SMYD3       | CAP1           | CACNG8      | TWIST1   |
| SNAI2       | CAPN15         | CACTIN      | TWIST2   |
| SNCA        | CAPN2          | CACUL1      | UBE2A    |
| SNW1        | CAPN7          | CACYBP      | UBN2     |

|          |         |         |         |
|----------|---------|---------|---------|
| SOX9     | CAPNS1  | CAD     | UBR1    |
| SP100    | CAPRIN1 | CADM1   | UBTF    |
| SP110    | CAPZA2  | CADM2   | UPF3B   |
| SP140    | CAPZB   | CADM3   | USP15   |
| SP140L   | CARHSP1 | CADM4   | USP27X  |
| SPI1     | CARKD   | CALCRL  | USP7    |
| SPIN1    | CARM1   | CALD1   | USP9X   |
| SRCAP    | CARS    | CALM1   | VEZF1   |
| SREBF1   | CASC3   | CALM2   | VIP     |
| SS18L1   | CASD1   | CALM3   | WAC     |
| SSRP1    | CASKIN2 | CALR    | WDFY3   |
| STRA13   | CASP2   | CAMK1D  | WDR26   |
| SUDS3    | CASP3   | CAMK2A  | WDR45   |
| SUPT3H   | CAST    | CAMK2B  | WNT4    |
| SUPT4H1  | CAT     | CAMK2G  | YAP1    |
| SUPT5H   | CBFB    | CAMK4   | YWHAG   |
| SUPT6H   | CBLB    | CAMKV   | YY1     |
| SUPT7L   | CBLL1   | CAMSAP1 | ZBTB18  |
| SUV39H1  | CBX1    | CAMSAP2 | ZBTB20  |
| SUV39H2  | CBX2    | CAMSAP3 | ZC4H2   |
| SUV420H1 | CBX3    | CAMTA1  | ZDHHC15 |
| SUV420H2 | CBX5    | CAMTA2  | ZDHHC9  |
| SUZ12    | CCAR1   | CAND1   | ZEB2    |
| SYCP3    | CCAR2   | CANX    | ZIC1    |
| TADA1    | CCDC124 | CAP2    | ZIC2    |
| TADA2A   | CCDC34  | CAPN15  | ZMYM6   |
| TADA2B   | CCDC47  | CAPN6   | ZMYND11 |
| TADA3    | CCDC50  | CAPRIN1 | ZMYND8  |
| TAF1     | CCDC6   | CAPZA1  | ZNF462  |
| TAF10    | CCDC8   | CAPZA2  | ZNF599  |
| TAF12    | CCDC85C | CAPZB   | ZNF711  |
| TAF1L    | CCDC97  | CARD11  | ZNF713  |
| TAF5     | CCM2    | CARM1   | ACHE    |
| TAF5L    | CCNA2   | CASC3   | ADA     |
| TAF6L    | CCNB1   | CASC5   | ADCY3   |
| TAF7     | CCNB2   | CASK    | ADSL    |
| TAF9     | CCND1   | CASKIN1 | AGAP2   |
| TBL1X    | CCND2   | CASKIN2 | AGO1    |
| TBL1XR1  | CCND3   | CASZ1   | AGO4    |
| TBL1Y    | CCNE1   | CBFA2T2 | AKAP9   |
| TCF3     | CCNF    | CBFB    | ALDH5A1 |
| TDG      | CCNG1   | CBLB    | AMPD1   |
| TDRD3    | CCNG2   | CBLL1   | AMT     |
| TERF1    | CCNI    | CBX1    | ANK3    |
| TERF2    | CCNJ    | CBX2    | ANXA1   |
| TET1     | CCNJL   | CBX4    | APBB1   |
| TET2     | CCNK    | CBX5    | APH1A   |
| TET3     | CCNL1   | CBX6    | ASAP2   |
| TFAM     | CCNL2   | CBX7    | ASPM    |
| TGFB1    | CCNY    | CBX8    | ASTN2   |
| TLK1     | CCT2    | CCAR1   | ATP10A  |

|         |          |         |          |
|---------|----------|---------|----------|
| TLK2    | CCT3     | CCAR2   | ATP2B2   |
| TNP1    | CCT4     | CCDC112 | AVPR1A   |
| TNRC18  | CCT5     | CCDC117 | BRSK2    |
| TOP1    | CCT6A    | CCDC121 | BTAF1    |
| TOP1MT  | CCT7     | CCDC132 | CACNA1C  |
| TOX     | CCT8     | CCDC182 | CACNB2   |
| TOX2    | CCZ1     | CCDC22  | CASZ1    |
| TOX3    | CCZ1B    | CCDC6   | CC2D1A   |
| TOX4    | CD151    | CCDC64  | CCNG1    |
| TP53    | CD164    | CCDC71L | CCT4     |
| TP63    | CD276    | CCDC85C | CDC42BPB |
| TPR     | CD2AP    | CCDC88A | CDH13    |
| TRIM16  | CD2BP2   | CCL2    | CEP135   |
| TRIM37  | CD34     | CCNA2   | CEP41    |
| TRIP12  | CD3EAP   | CCNB3   | CGNL1    |
| TRPS1   | CD63     | CCNC    | CHD3     |
| TRRAP   | CD81     | CCND1   | CHMP1A   |
| TSPYL2  | CD99L2   | CCND2   | CHRNA7   |
| TTF1    | CDC123   | CCND3   | CIB2     |
| TWIST1  | CDC16    | CCNE1   | CLASP1   |
| UBE2A   | CDC20    | CCNE2   | CNR1     |
| UBE2B   | CDC23    | CCNI    | CNTN5    |
| UBE2E1  | CDC25A   | CCNJ    | CNTN6    |
| UBE2N   | CDC25B   | CCNK    | CNTNAP3  |
| UBE2U   | CDC27    | CCNL1   | CNTNAP4  |
| UBN1    | CDC34    | CCNT2   | CPEB4    |
| UBR2    | CDC37    | CCNY    | CSDE1    |
| UBR5    | CDC42    | CCNYL1  | CTTNBP2  |
| UBTF    | CDC42BPB | CCSER2  | CUL7     |
| UCN     | CDC42EP4 | CCT2    | CYFIP1   |
| UHRF1   | CDC42SE1 | CCT3    | DAPP1    |
| UHRF2   | CDC42SE2 | CCT4    | DENR     |
| UIMC1   | CDC45    | CCT5    | DHCR7    |
| USP15   | CDC5L    | CCT6A   | DISC1    |
| USP16   | CDC7     | CCT7    | DLG2     |
| USP17L2 | CDC73    | CCT8    | DLGAP1   |
| USP21   | CDCA2    | CD19    | DLX3     |
| USP22   | CDCA3    | CD22    | DMPK     |
| USP3    | CDCA4    | CD40    | DOCK8    |
| USP49   | CDCA5    | CD40LG  | DPP10    |
| USP51   | CDCA7    | CD47    | EFR3A    |
| USP7    | CDCA7L   | CD59    | ELP4     |
| UTP3    | CDCA8    | CD79A   | EMSY     |
| UTY     | CDH11    | CD79B   | EP400    |
| VEGFA   | CDH2     | CD81    | ETFB     |
| VPRBP   | CDH24    | CD86    | FAM92B   |
| VPS72   | CDH5     | CDC14B  | FBN1     |
| VRK1    | CDIP1    | CDC16   | GABRG3   |
| WAC     | CDIPT    | CDC23   | GALNT8   |
| WBP2    | CDK1     | CDC25A  | GGNBP2   |
| WBSCR22 | CDK11A   | CDC26   | GPC4     |

|         |            |          |          |
|---------|------------|----------|----------|
| WDR5    | CDK13      | CDC27    | GPHN     |
| WDR61   | CDK16      | CDC34    | GRID1    |
| WDR82   | CDK17      | CDC37    | GRIK2    |
| WDR92   | CDK2       | CDC37L1  | GRIK5    |
| WHSC1   | CDK4       | CDC40    | HIVEP3   |
| WHSC1L1 | CDK5RAP2   | CDC42    | HMGN1    |
| YEATS2  | CDK5RAP3   | CDC42BPA | ICA1     |
| YEATS4  | CDK9       | CDC42BPB | ITGB3    |
| ZMYND11 | CDKN1C     | CDC42SE2 | JARID2   |
| ZNF335  | CDKN2AIPNL | CDC5L    | KCNJ10   |
| ZNHIT1  | CDON       | CDC73    | KCNS3    |
|         | CDR2L      | CDCA3    | KDM3B    |
|         | CDS2       | CDH11    | KDM4C    |
|         | CDT1       | CDH2     | KIAA1586 |
|         | CDV3       | CDH4     | KIF14    |
|         | CEBPZ      | CDH5     | LAMB1    |
|         | CECR2      | CDH6     | LMX1B    |
|         | CELF1      | CDH7     | LRP1     |
|         | CELF2      | CDH8     | LZTR1    |
|         | CELSR1     | CDH9     | MACROD2  |
|         | CELSR2     | CDIP1    | MEIS2    |
|         | CENPA      | CDK1     | MFRP     |
|         | CENPB      | CDK12    | MIR137   |
|         | CENPE      | CDK13    | MYO5A    |
|         | CENPF      | CDK16    | MYO9B    |
|         | CENPH      | CDK17    | NAV2     |
|         | CENPN      | CDK19    | NBEA     |
|         | CENPQ      | CDK2     | NCOR1    |
|         | CEP104     | CDK2AP2  | NFE2L3   |
|         | CEP120     | CDK5R1   | NINL     |
|         | CEP164     | CDK5R2   | NLGN1    |
|         | CEP170     | CDK6     | NLGN2    |
|         | CEP250     | CDKL5    | NR4A2    |
|         | CEP57      | CDKN1B   | NUAK1    |
|         | CEP68      | CDKN1C   | NUDCD2   |
|         | CEP78      | CDKN2AIP | OR52M1   |
|         | CEP85      | CDV3     | OTUD7A   |
|         | CERS2      | CDX2     | OXTR     |
|         | CERS5      | CDYL     | P2RX5    |
|         | CETN3      | CEBPA    | P4HA2    |
|         | CFDP1      | CEBPD    | PAH      |
|         | CFL1       | CECR2    | PAK2     |
|         | CFL2       | CECR6    | PARD3B   |
|         | CFLAR      | CELF1    | PER2     |
|         | CGGBP1     | CELF2    | PHB      |
|         | CHAF1A     | CELF3    | PHRF1    |
|         | CHAF1B     | CELF4    | PLCB1    |
|         | CHAMP1     | CELF5    | PLXNA4   |
|         | CHCHD2     | CELSR1   | PLXNB1   |
|         | CHCHD3     | CELSR2   | POMGNT1  |
|         | CHCHD4     | CELSR3   | PON1     |

|  |         |         |             |
|--|---------|---------|-------------|
|  | CHD1    | CEND1   | PREX1       |
|  | CHD3    | CENPB   | PRICKLE1    |
|  | CHD4    | CENPI   | PRICKLE2    |
|  | CHD7    | CEP170  | PRKCB       |
|  | CHD8    | CEP170B | PRKD2       |
|  | CHEK1   | CEP350  | PRKN        |
|  | CHERP   | CEP68   | PRODH       |
|  | CHFR    | CEPT1   | PTCHD1-AS   |
|  | CHMP3   | CETN2   | PTPN11      |
|  | CHMP4B  | CFH     | PYHIN1      |
|  | CHMP7   | CFL1    | RAB2A       |
|  | CHORDC1 | CFLAR   | RAB43       |
|  | CHST1   | CFP     | RALGAPB     |
|  | CHSY1   | CGGBP1  | RBFOX1      |
|  | CHTF18  | CHAF1A  | RBM27       |
|  | CHTF8   | CHAMP1  | ROBO2       |
|  | CHTOP   | CHD1    | RPS10P2-AS1 |
|  | CIC     | CHD2    | SAE1        |
|  | CIPC    | CHD3    | SBF1        |
|  | CIRBP   | CHD4    | SEMA5A      |
|  | CIRH1A  | CHD5    | SETD2       |
|  | CITED2  | CHD6    | SHOX        |
|  | CIZ1    | CHD7    | SLC35B1     |
|  | CKAP2   | CHD8    | SLC38A10    |
|  | CKAP2L  | CHD9    | SLC6A3      |
|  | CKAP4   | CHERP   | SLC7A3      |
|  | CKAP5   | CHIC1   | SLC7A5      |
|  | CKB     | CHIC2   | SLITRK5     |
|  | CKLF    | CHM     | SMAD4       |
|  | CKS2    | CHMP1B  | SNX5        |
|  | CLASP1  | CHMP4B  | SPARCL1     |
|  | CLASRP  | CHMP6   | SPEN        |
|  | CLCN6   | CHMP7   | SRPRA       |
|  | CLDN12  | CHORDC1 | ST8SIA2     |
|  | CLDN6   | CHP1    | STXBP5      |
|  | CLDND1  | CHRM1   | SUPT16H     |
|  | CLIC1   | CHRM3   | TAF6        |
|  | CLIC4   | CHRM4   | TANC2       |
|  | CLINT1  | CHST1   | TBC1D31     |
|  | CLIP2   | CHSY1   | TBCK        |
|  | CLIP3   | CHTF8   | TERF2       |
|  | CLK1    | CHTOP   | TET2        |
|  | CLK2    | CHUK    | TMLHE       |
|  | CLK3    | CIC     | TRAPPC9     |
|  | CLNS1A  | CIT     | TRPC6       |
|  | CLPP    | CITED2  | TRPM1       |
|  | CLPTM1  | CKAP4   | TSHZ3       |
|  | CLPTM1L | CKAP5   | UBE3A       |
|  | CLSTN1  | CLASP1  | UBE3C       |
|  | CLTA    | CLASP2  | UBR5        |
|  | CLTC    | CLCF1   | UNC79       |

|  |          |         |         |
|--|----------|---------|---------|
|  | CLUH     | CLCN3   | USP45   |
|  | CMAS     | CLCN4   | VIL1    |
|  | CMIP     | CLCN5   | VPS13B  |
|  | CMPK1    | CLDN11  | WDFY4   |
|  | CMTM3    | CLDN2   | WWOX    |
|  | CMTR1    | CLDN3   | ZC3H4   |
|  | CNBP     | CLDN5   | ZMIZ1   |
|  | CNDP2    | CLINT1  | ZNF292  |
|  | CNIH1    | CLIP1   | ZNF804A |
|  | CNIH2    | CLIP2   |         |
|  | CNN2     | CLIP3   |         |
|  | CNN3     | CLK2    |         |
|  | CNOT1    | CLOCK   |         |
|  | CNOT11   | CLPP    |         |
|  | CNOT2    | CLPTM1  |         |
|  | CNOT3    | CLPX    |         |
|  | CNOT6    | CLSTN1  |         |
|  | CNOT7    | CLSTN3  |         |
|  | CNOT8    | CLTA    |         |
|  | CNPY2    | CLTC    |         |
|  | CNPY4    | CLUH    |         |
|  | CNTFR    | CLVS1   |         |
|  | CNTRL    | CMAS    |         |
|  | COA3     | CMIP    |         |
|  | COA5     | CMPK1   |         |
|  | COG1     | CMTR1   |         |
|  | COG4     | CNBP    |         |
|  | COG8     | CNIH1   |         |
|  | COL18A1  | CNIH2   |         |
|  | COL1A1   | CNIH3   |         |
|  | COL1A2   | CNKSR2  |         |
|  | COL2A1   | CNN3    |         |
|  | COL3A1   | CNNM2   |         |
|  | COL4A1   | CNOT1   |         |
|  | COL4A2   | CNOT10  |         |
|  | COL5A2   | CNOT11  |         |
|  | COLEC12  | CNOT2   |         |
|  | COLGALT1 | CNOT3   |         |
|  | COMMD4   | CNOT4   |         |
|  | COPA     | CNOT6L  |         |
|  | COPB1    | CNOT7   |         |
|  | COPB2    | CNP     |         |
|  | COPE     | CNR1    |         |
|  | COPG1    | CNTFR   |         |
|  | COPG2    | CNTNAP5 |         |
|  | COPS2    | COG3    |         |
|  | COPS3    | COL11A1 |         |
|  | COPS4    | COL11A2 |         |
|  | COPS5    | COL12A1 |         |
|  | COPS6    | COL1A1  |         |
|  | COPS7A   | COL1A2  |         |



|  |         |          |  |
|--|---------|----------|--|
|  | COPS7B  | COL27A1  |  |
|  | COPS8   | COL2A1   |  |
|  | COPZ1   | COL3A1   |  |
|  | COQ2    | COL4A1   |  |
|  | COQ5    | COL4A3BP |  |
|  | CORO1B  | COL4A5   |  |
|  | CORO1C  | COL4A6   |  |
|  | COTL1   | COL5A1   |  |
|  | COX15   | COL5A2   |  |
|  | COX16   | COL6A1   |  |
|  | COX19   | COLCA2   |  |
|  | COX20   | COLEC12  |  |
|  | COX411  | COPA     |  |
|  | COX5A   | COPB1    |  |
|  | COX5B   | COPB2    |  |
|  | COX6A1  | COPE     |  |
|  | COX6B1  | COPS2    |  |
|  | COX6C   | COPS3    |  |
|  | COX7A2  | COPS4    |  |
|  | COX8A   | COPS5    |  |
|  | CPE     | COPS6    |  |
|  | CPLX2   | COPS7B   |  |
|  | CPNE1   | COPS8    |  |
|  | CPSF1   | COPZ1    |  |
|  | CPSF2   | CORO1A   |  |
|  | CPSF3   | CORO1C   |  |
|  | CPSF3L  | COX5B    |  |
|  | CPSF4   | COX7B    |  |
|  | CPSF6   | COX7C    |  |
|  | CPSF7   | CPE      |  |
|  | CRABP1  | CPEB1    |  |
|  | CRABP2  | CPEB3    |  |
|  | CRAMP1L | CPEB4    |  |
|  | CRB2    | CPLX1    |  |
|  | CREB1   | CPLX2    |  |
|  | CREBBP  | CPSF6    |  |
|  | CREBZF  | CPSF7    |  |
|  | CRELD2  | CRADD    |  |
|  | CRIP2   | CREB1    |  |
|  | CRIP2   | CREB3L1  |  |
|  | CRK     | CREBBP   |  |
|  | CRKL    | CREBL2   |  |
|  | CRLF1   | CREBRF   |  |
|  | CRLF3   | CREM     |  |
|  | CRLS1   | CRH      |  |
|  | CRMP1   | CRIM1    |  |
|  | CRTC2   | CRK      |  |
|  | CRY2    | CRMP1    |  |
|  | CS      | CRTC1    |  |
|  | CSDE1   | CRTC2    |  |
|  | CSE1L   | CRTC3    |  |

|  |          |               |  |
|--|----------|---------------|--|
|  | CSK      | CRX           |  |
|  | CSNK1A1L | CS            |  |
|  | CSNK1D   | CSDE1         |  |
|  | CSNK1E   | CSE1L         |  |
|  | CSNK1G2  | CSF1          |  |
|  | CSNK1G3  | CSF2          |  |
|  | CSNK2A1  | CSK           |  |
|  | CSNK2A2  | CSMD1         |  |
|  | CSNK2B   | CSNK1A1       |  |
|  | CSRP1    | CSNK1D        |  |
|  | CSRP2    | CSNK1E        |  |
|  | CSRP2BP  | CSNK1G1       |  |
|  | CSTF1    | CSNK1G2       |  |
|  | CSTF2    | CSNK1G3       |  |
|  | CSTF2T   | CSNK2A1       |  |
|  | CSTF3    | CSNK2A2       |  |
|  | CTAGE1   | CSNK2B        |  |
|  | CTAGE5   | CSRNP2        |  |
|  | CTAGE8   | CSRNP3        |  |
|  | CTAGE9   | CSTF1         |  |
|  | CTBP1    | CSTF2         |  |
|  | CTBP2    | CSTF3         |  |
|  | CTC1     | CTB-102L5.4   |  |
|  | CTCF     | CTBP1         |  |
|  | CTDNEP1  | CTC-273B12.7  |  |
|  | CTDP1    | CTC-432M15.3  |  |
|  | CTDSP1   | CTCF          |  |
|  | CTDSP2   | CTD-2260A17.2 |  |
|  | CTGF     | CTD-2545M3.6  |  |
|  | CTNNA1   | CTDNEP1       |  |
|  | CTNNB1   | CTDSP1        |  |
|  | CTNNBL1  | CTDSPL2       |  |
|  | CTNND1   | CTIF          |  |
|  | CTPS1    | CTLA4         |  |
|  | CTR9     | CTNNA1        |  |
|  | CTSA     | CTNNB1        |  |
|  | CTSB     | CTNND1        |  |
|  | CTSD     | CTNND2        |  |
|  | CTSV     | CTPS1         |  |
|  | CTSZ     | CTPS2         |  |
|  | CTTN     | CTR9          |  |
|  | CTXN1    | CUL1          |  |
|  | CUEDC2   | CUL2          |  |
|  | CUL1     | CUL3          |  |
|  | CUL2     | CUL4A         |  |
|  | CUL3     | CUL4B         |  |
|  | CUL4A    | CUL5          |  |
|  | CUL4B    | CUL9          |  |
|  | CUL7     | CUX1          |  |
|  | CUTA     | CUX2          |  |
|  | CUX1     | CWC15         |  |

|  |         |          |  |
|--|---------|----------|--|
|  | CWC15   | CX3CL1   |  |
|  | CXADR   | CXCL13   |  |
|  | CXCL12  | CXCR5    |  |
|  | CXCR2   | CXorf21  |  |
|  | CXCR4   | CXorf22  |  |
|  | CXorf38 | CXorf23  |  |
|  | CXXC1   | CXorf30  |  |
|  | CXXC5   | CXorf40A |  |
|  | CYB5A   | CXorf56  |  |
|  | CYB5B   | CXorf65  |  |
|  | CYB5R3  | CXXC1    |  |
|  | CYC1    | CXXC4    |  |
|  | CYFIP1  | CXXC5    |  |
|  | CYHR1   | CYB561   |  |
|  | CYP51A1 | CYBB     |  |
|  | CYTH2   | CYCS     |  |
|  | DAAM1   | CYFIP1   |  |
|  | DAB1    | CYFIP2   |  |
|  | DAB2IP  | CYLC1    |  |
|  | DAG1    | CYLD     |  |
|  | DAK     | CYP26B1  |  |
|  | DALRD3  | CYP46A1  |  |
|  | DARS    | CYR61    |  |
|  | DAXX    | CYTH1    |  |
|  | DAZAP1  | CYTH3    |  |
|  | DAZAP2  | DAAM1    |  |
|  | DBF4    | DAAM2    |  |
|  | DBI     | DAB1     |  |
|  | DBN1    | DAB2IP   |  |
|  | DBNL    | DACH1    |  |
|  | DCAF11  | DACT3    |  |
|  | DCAF12  | DAG1     |  |
|  | DCAF13  | DAGLA    |  |
|  | DCAF15  | DAPK1    |  |
|  | DCAF7   | DAZAP1   |  |
|  | DCAF8   | DAZL     |  |
|  | DCAKD   | DBF4     |  |
|  | DCBLD2  | DBN1     |  |
|  | DCHS1   | DCAF10   |  |
|  | DCK     | DCAF12L1 |  |
|  | DCLRE1C | DCAF15   |  |
|  | DCP1A   | DCAF5    |  |
|  | DCP2    | DCAF7    |  |
|  | DCPS    | DCAF8    |  |
|  | DCTN1   | DCAF8    |  |
|  | DCTN2   | DCAF8L2  |  |
|  | DCTN3   | DCC      |  |
|  | DCTN4   | DCHS1    |  |
|  | DCTN5   | DCLK1    |  |
|  | DCTN6   | DCLK2    |  |
|  | DCTPP1  | DCLRE1B  |  |

|  |         |         |  |
|--|---------|---------|--|
|  | DCUN1D4 | DGP1A   |  |
|  | DCUN1D5 | DGP2    |  |
|  | DDA1    | DCTN2   |  |
|  | DDB1    | DCTN4   |  |
|  | DDI2    | DCUN1D1 |  |
|  | DDIT4   | DCUN1D3 |  |
|  | DDOST   | DCUN1D5 |  |
|  | DDR1    | DDA1    |  |
|  | DDX1    | DDB1    |  |
|  | DDX11   | DDHD1   |  |
|  | DDX17   | DDI2    |  |
|  | DDX18   | DDIT3   |  |
|  | DDX19A  | DDR2    |  |
|  | DDX20   | DDX1    |  |
|  | DDX21   | DDX17   |  |
|  | DDX23   | DDX19A  |  |
|  | DDX27   | DDX21   |  |
|  | DDX39A  | DDX23   |  |
|  | DDX39B  | DDX24   |  |
|  | DDX3X   | DDX26B  |  |
|  | DDX41   | DDX27   |  |
|  | DDX42   | DDX39A  |  |
|  | DDX46   | DDX39B  |  |
|  | DDX47   | DDX3X   |  |
|  | DDX49   | DDX3Y   |  |
|  | DDX5    | DDX4    |  |
|  | DDX52   | DDX42   |  |
|  | DDX54   | DDX46   |  |
|  | DDX56   | DDX5    |  |
|  | DDX6    | DDX53   |  |
|  | DEAF1   | DDX6    |  |
|  | DEGS1   | DEDD    |  |
|  | DEK     | DEF6    |  |
|  | DENND2A | DENND1A |  |
|  | DENND5A | DENND4A |  |
|  | DENR    | DENND4B |  |
|  | DESI1   | DENND5B |  |
|  | DGAT1   | DENR    |  |
|  | DGCR2   | DERL2   |  |
|  | DGCR8   | DESI2   |  |
|  | DGKD    | DET1    |  |
|  | DGKZ    | DGCR8   |  |
|  | DHCR24  | DGKB    |  |
|  | DHCR7   | DGKI    |  |
|  | DHDDS   | DHX15   |  |
|  | DHRS1   | DHX30   |  |
|  | DHX15   | DHX37   |  |
|  | DHX16   | DHX40   |  |
|  | DHX29   | DHX9    |  |
|  | DHX30   | DIAPH1  |  |
|  | DHX32   | DIAPH2  |  |

|  |         |               |  |
|--|---------|---------------|--|
|  | DHX33   | DICER1        |  |
|  | DHX34   | DIDO1         |  |
|  | DHX36   | DIO1          |  |
|  | DHX37   | DIO2          |  |
|  | DHX38   | DIO3          |  |
|  | DHX40   | DIP2B         |  |
|  | DHX8    | DIP2C         |  |
|  | DHX9    | DIS3L2        |  |
|  | DICER1  | DKC1          |  |
|  | DIP2B   | DKFZP761J1410 |  |
|  | DIS3    | DKK2          |  |
|  | DKC1    | DLC1          |  |
|  | DLAT    | DLG1          |  |
|  | DLD     | DLG2          |  |
|  | DLG1    | DLG3          |  |
|  | DLG3    | DLG4          |  |
|  | DLG4    | DLG5          |  |
|  | DLG5    | DLGAP1        |  |
|  | DLGAP5  | DLGAP2        |  |
|  | DLK1    | DLGAP3        |  |
|  | DLL1    | DLGAP4        |  |
|  | DLST    | DLK2          |  |
|  | DMAP1   | DLL1          |  |
|  | DMPK    | DLL4          |  |
|  | DMWD    | DLX1          |  |
|  | DNA2    | DLX2          |  |
|  | DNAAF2  | DLX6          |  |
|  | DNAJA1  | DMBX1         |  |
|  | DNAJA2  | DMD           |  |
|  | DNAJB1  | DMRT1         |  |
|  | DNAJB12 | DMRTA2        |  |
|  | DNAJC1  | DMRTB1        |  |
|  | DNAJC10 | DMRTC2        |  |
|  | DNAJC11 | DMTF1         |  |
|  | DNAJC13 | DMTN          |  |
|  | DNAJC2  | DMXL1         |  |
|  | DNAJC5  | DMXL2         |  |
|  | DNAJC7  | DNAJA2        |  |
|  | DNAJC8  | DNAJB14       |  |
|  | DNAJC9  | DNAJB6        |  |
|  | DNM1    | DNAJC11       |  |
|  | DNM1L   | DNAJC13       |  |
|  | DNM2    | DNAJC14       |  |
|  | DNMT1   | DNAJC2        |  |
|  | DNMT3A  | DNAJC5        |  |
|  | DNMT3B  | DNAJC6        |  |
|  | DNPEP   | DNAJC7        |  |
|  | DNP1    | DNM1          |  |
|  | DNTTIP2 | DNM2          |  |
|  | DOC2A   | DNMT1         |  |
|  | DOCK7   | DNTTIP1       |  |

|  |          |          |  |
|--|----------|----------|--|
|  | DOHH     | DOCK2    |  |
|  | DOLPP1   | DOCK3    |  |
|  | DONSON   | DOCK4    |  |
|  | DOT1L    | DOCK9    |  |
|  | DPF2     | DOPEY1   |  |
|  | DPM1     | DOT1L    |  |
|  | DPM2     | DPF1     |  |
|  | DPP3     | DPF2     |  |
|  | DPP8     | DPP10    |  |
|  | DPP9     | DPP8     |  |
|  | DPY19L1  | DPP9     |  |
|  | DPY30    | DPYSL2   |  |
|  | DPYSL2   | DPYSL3   |  |
|  | DPYSL3   | DPYSL5   |  |
|  | DPYSL4   | DR1      |  |
|  | DPYSL5   | DRD1     |  |
|  | DR1      | DRD2     |  |
|  | DRAP1    | DSCAM    |  |
|  | DRG1     | DSCAML1  |  |
|  | DRG2     | DSE      |  |
|  | DROSHA   | DSG1     |  |
|  | DSCR3    | DSP      |  |
|  | DSTN     | DST      |  |
|  | DTL      | DSTN     |  |
|  | DTX3     | DSTYK    |  |
|  | DTX4     | DTNA     |  |
|  | DTYMK    | DTX3     |  |
|  | DUS1L    | DUSP10   |  |
|  | DUS3L    | DUSP4    |  |
|  | DUSP11   | DUSP6    |  |
|  | DUSP6    | DUSP7    |  |
|  | DUSP7    | DUSP8    |  |
|  | DUSP9    | DUSP9    |  |
|  | DUT      | DYNC1H1  |  |
|  | DVL1     | DYNC1LI1 |  |
|  | DVL3     | DYNC1LI2 |  |
|  | DXO      | DYNLL1   |  |
|  | DYNC1H1  | DYNLL2   |  |
|  | DYNC1I2  | DYNLT3   |  |
|  | DYNC1LI1 | DYRK1A   |  |
|  | DYNC1LI2 | DYRK1B   |  |
|  | DYNLL2   | DYRK2    |  |
|  | DYNLRB1  | E2F1     |  |
|  | DYNLT1   | E2F3     |  |
|  | DYRK1A   | E2F5     |  |
|  | DYRK1B   | E2F7     |  |
|  | DZIP1    | E2F8     |  |
|  | E2F1     | EBF1     |  |
|  | E2F3     | EBF2     |  |
|  | E2F4     | EBF3     |  |
|  | E2F5     | EBP      |  |

|  |          |           |  |
|--|----------|-----------|--|
|  | E2F6     | ECE1      |  |
|  | E2F8     | EDA       |  |
|  | E4F1     | EDF1      |  |
|  | EAF1     | EDNRA     |  |
|  | EBNA1BP2 | EEA1      |  |
|  | ECD      | EED       |  |
|  | ECI2     | EEF1A1    |  |
|  | ECT2     | EEF1A2    |  |
|  | EDC3     | EEF1G     |  |
|  | EDC4     | EEF2      |  |
|  | EDF1     | EFEMP1    |  |
|  | EED      | EFHC2     |  |
|  | EEF1A1   | EFNA5     |  |
|  | EEF1B2   | EFNB1     |  |
|  | EEF1D    | EFNB2     |  |
|  | EEF1E1   | EFTUD2    |  |
|  | EEF1G    | EGLN1     |  |
|  | EEF2     | EGLN2     |  |
|  | EFNA2    | EGR2      |  |
|  | EFNA5    | EGR3      |  |
|  | EFNB1    | EHD1      |  |
|  | EFNB2    | EHF       |  |
|  | EFNB3    | EHMT1     |  |
|  | EFR3A    | EI24      |  |
|  | EFS      | EIF1      |  |
|  | EFTUD2   | EIF1AX    |  |
|  | EGFL7    | EIF1AY    |  |
|  | EGLN1    | EIF1B     |  |
|  | EHD1     | EIF2B3    |  |
|  | EHMT1    | EIF2B4    |  |
|  | EHMT2    | EIF2S1    |  |
|  | EI24     | EIF2S2    |  |
|  | EID1     | EIF2S3    |  |
|  | EIF1     | EIF3A     |  |
|  | EIF1AD   | EIF3B     |  |
|  | EIF1AX   | EIF3D     |  |
|  | EIF1B    | EIF3F     |  |
|  | EIF2A    | EIF3G     |  |
|  | EIF2AK1  | EIF3I     |  |
|  | EIF2B1   | EIF3J     |  |
|  | EIF2B2   | EIF3L     |  |
|  | EIF2B5   | EIF4A1    |  |
|  | EIF2D    | EIF4A2    |  |
|  | EIF2S1   | EIF4A3    |  |
|  | EIF2S2   | EIF4B     |  |
|  | EIF2S3   | EIF4E     |  |
|  | EIF3A    | EIF4E2    |  |
|  | EIF3B    | EIF4ENIF1 |  |
|  | EIF3C    | EIF4G1    |  |
|  | EIF3CL   | EIF4G2    |  |
|  | EIF3D    | EIF4G3    |  |

|  |           |          |  |
|--|-----------|----------|--|
|  | EIF3E     | EIF5     |  |
|  | EIF3F     | EIF5A    |  |
|  | EIF3G     | EIF5B    |  |
|  | EIF3H     | ELAC1    |  |
|  | EIF3I     | ELAVL1   |  |
|  | EIF3K     | ELAVL2   |  |
|  | EIF3L     | ELAVL3   |  |
|  | EIF4A2    | ELAVL4   |  |
|  | EIF4A3    | ELF2     |  |
|  | EIF4B     | ELF3     |  |
|  | EIF4E     | ELFN1    |  |
|  | EIF4E2    | ELFN2    |  |
|  | EIF4EBP1  | ELK1     |  |
|  | EIF4EBP2  | ELL      |  |
|  | EIF4ENIF1 | ELL2     |  |
|  | EIF4G1    | ELMO1    |  |
|  | EIF4G2    | ELMOD1   |  |
|  | EIF4G3    | ELMSAN1  |  |
|  | EIF4H     | ELOVL1   |  |
|  | EIF5      | ELOVL4   |  |
|  | EIF5A     | ELOVL5   |  |
|  | EIF5AL1   | ELOVL6   |  |
|  | EIF5B     | EMC4     |  |
|  | EIF6      | EMC6     |  |
|  | ELAC2     | EMC7     |  |
|  | ELAVL1    | EMC8     |  |
|  | ELF2      | EMD      |  |
|  | ELMO2     | EML1     |  |
|  | ELOF1     | EMX1     |  |
|  | ELOVL2    | EMX2     |  |
|  | ELOVL5    | EN1      |  |
|  | ELOVL6    | EN2      |  |
|  | ELP2      | ENAH     |  |
|  | ELP3      | ENG      |  |
|  | ELP5      | ENY2     |  |
|  | EMB       | EOMES    |  |
|  | EMC10     | EP300    |  |
|  | EMC2      | EP400    |  |
|  | EMC4      | EPAS1    |  |
|  | EMC6      | EPB41L1  |  |
|  | EMC7      | EPB41L2  |  |
|  | EMC8      | EPB41L4B |  |
|  | EMD       | EPC1     |  |
|  | EME1      | EPC2     |  |
|  | EMILIN1   | EPHA4    |  |
|  | EML1      | EPHA6    |  |
|  | EML3      | EPHA7    |  |
|  | EML4      | EPHB1    |  |
|  | EN2       | EPHB2    |  |
|  | ENAH      | EPM2AIP1 |  |
|  | ENC1      | EPN1     |  |



|  |         |         |  |
|--|---------|---------|--|
|  | ENG     | EPN2    |  |
|  | ENO1    | EPS15L1 |  |
|  | ENO3    | EPS8    |  |
|  | ENOPH1  | EPT1    |  |
|  | ENSA    | ERBB2IP |  |
|  | ENY2    | ERBB4   |  |
|  | EP300   | ERC2    |  |
|  | EP400   | ERCC6L  |  |
|  | EPB41   | ERF     |  |
|  | EPB41L2 | ERG     |  |
|  | EPC1    | ERGIC1  |  |
|  | EPHB2   | ERH     |  |
|  | EPHB4   | ERN1    |  |
|  | EPN1    | ERO1L   |  |
|  | EPO     | ERP29   |  |
|  | EPRS    | ERP44   |  |
|  | EPS15L1 | ESCO1   |  |
|  | ERAL1   | ESPL1   |  |
|  | ERBB2   | ESR1    |  |
|  | ERBB2IP | ESRP1   |  |
|  | ERC1    | ESRRA   |  |
|  | ERCC2   | ESX1    |  |
|  | ERCC3   | ETF1    |  |
|  | ERCC6L  | ETNK1   |  |
|  | ERCC6L2 | ETS1    |  |
|  | ERF     | ETS2    |  |
|  | ERGIC1  | ETV1    |  |
|  | ERGIC2  | ETV3    |  |
|  | ERGIC3  | ETV5    |  |
|  | ERH     | ETV6    |  |
|  | ERI1    | EVA1B   |  |
|  | ERLIN2  | EVI5L   |  |
|  | ERO1L   | EVL     |  |
|  | ESF1    | EWSR1   |  |
|  | ESPL1   | EXOC3   |  |
|  | ESYT2   | EXOC3L2 |  |
|  | ETF1    | EXOC5   |  |
|  | ETFB    | EXOC8   |  |
|  | ETV6    | EXOSC6  |  |
|  | EVL     | EXT1    |  |
|  | EWSR1   | EYA1    |  |
|  | EXD2    | EYA3    |  |
|  | EXOC3   | EZH2    |  |
|  | EXOC5   | F8      |  |
|  | EXOSC10 | F9      |  |
|  | EXOSC2  | FADD    |  |
|  | EXOSC4  | FADS2   |  |
|  | EXOSC7  | FAF1    |  |
|  | EXOSC8  | FAF2    |  |
|  | EXOSC9  | FAM115A |  |
|  | EXT1    | FAM120A |  |

|  |          |          |  |
|--|----------|----------|--|
|  | EXT2     | FAM120C  |  |
|  | EXTL3    | FAM122B  |  |
|  | EYA2     | FAM131B  |  |
|  | EYA3     | FAM135A  |  |
|  | EZH2     | FAM135B  |  |
|  | EZR      | FAM155A  |  |
|  | F2R      | FAM155B  |  |
|  | FADS1    | FAM160A2 |  |
|  | FADS2    | FAM160B1 |  |
|  | FAF2     | FAM168A  |  |
|  | FAM107B  | FAM169A  |  |
|  | FAM109A  | FAM171A1 |  |
|  | FAM114A2 | FAM171A2 |  |
|  | FAM115A  | FAM193A  |  |
|  | FAM120A  | FAM193B  |  |
|  | FAM127A  | FAM196A  |  |
|  | FAM127B  | FAM196B  |  |
|  | FAM127C  | FAM199X  |  |
|  | FAM134A  | FAM208A  |  |
|  | FAM134C  | FAM211A  |  |
|  | FAM136A  | FAM214B  |  |
|  | FAM149B1 | FAM222A  |  |
|  | FAM162A  | FAM229B  |  |
|  | FAM168A  | FAM3A    |  |
|  | FAM168B  | FAM46A   |  |
|  | FAM171A1 | FAM46C   |  |
|  | FAM171A2 | FAM46D   |  |
|  | FAM172A  | FAM49B   |  |
|  | FAM178A  | FAM50A   |  |
|  | FAM192A  | FAM53B   |  |
|  | FAM193A  | FAM57B   |  |
|  | FAM193B  | FAM58A   |  |
|  | FAM195B  | FAM60A   |  |
|  | FAM206A  | FAM65A   |  |
|  | FAM213A  | FAM65B   |  |
|  | FAM216A  | FAM69A   |  |
|  | FAM21A   | FAM83H   |  |
|  | FAM21B   | FAM84A   |  |
|  | FAM21C   | FAM98A   |  |
|  | FAM222B  | FANCB    |  |
|  | FAM32A   | FAR1     |  |
|  | FAM49B   | FAR2     |  |
|  | FAM53A   | FAS      |  |
|  | FAM53C   | FASN     |  |
|  | FAM57A   | FAT3     |  |
|  | FAM63B   | FAT4     |  |
|  | FAM64A   | FAU      |  |
|  | FAM65A   | FAXC     |  |
|  | FAM76B   | FBL      |  |
|  | FAM91A1  | FBLN1    |  |
|  | FAM96A   | FBLN5    |  |

|  |          |        |  |
|--|----------|--------|--|
|  | FAM98A   | FBN1   |  |
|  | FAM98B   | FBN2   |  |
|  | FAR1     | FBR5   |  |
|  | FARP1    | FBXL14 |  |
|  | FARSA    | FBXL16 |  |
|  | FARSB    | FBXL17 |  |
|  | FASN     | FBXL19 |  |
|  | FASTK    | FBXL20 |  |
|  | FAT1     | FBXL3  |  |
|  | FBF1     | FBXL5  |  |
|  | FBLN1    | FBXO11 |  |
|  | FBN2     | FBXO15 |  |
|  | FBR5     | FBXO21 |  |
|  | FBXL14   | FBXO22 |  |
|  | FBXL19   | FBXO28 |  |
|  | FBXL6    | FBXO3  |  |
|  | FBXO11   | FBXO32 |  |
|  | FBXO18   | FBXO33 |  |
|  | FBXO21   | FBXO38 |  |
|  | FBXO22   | FBXO41 |  |
|  | FBXO38   | FBXO42 |  |
|  | FBXO42   | FBXO45 |  |
|  | FBXO45   | FBXO46 |  |
|  | FBXO5    | FBXO5  |  |
|  | FBXW11   | FBXW11 |  |
|  | FBXW5    | FBXW2  |  |
|  | FBXW8    | FBXW7  |  |
|  | FCF1     | FCER1G |  |
|  | FCHSD2   | FCHO1  |  |
|  | FECH     | FCHO2  |  |
|  | FEM1B    | FCHSD2 |  |
|  | FEM1C    | FEM1C  |  |
|  | FEN1     | FER    |  |
|  | FERMT2   | FERMT2 |  |
|  | FEZ1     | FEZ1   |  |
|  | FGD1     | FEZF1  |  |
|  | FGF19    | FEZF2  |  |
|  | FGFR1    | FGB    |  |
|  | FGFR1OP  | FGD1   |  |
|  | FGFR1OP2 | FGD5   |  |
|  | FGFR2    | FGF10  |  |
|  | FGFRL1   | FGF12  |  |
|  | FH       | FGF13  |  |
|  | FHL1     | FGF14  |  |
|  | FHOD3    | FGF16  |  |
|  | FIP1L1   | FGF17  |  |
|  | FIS1     | FGF19  |  |
|  | FIZ1     | FGF20  |  |
|  | FKBP10   | FGF7   |  |
|  | FKBP1A   | FGF8   |  |
|  | FKBP3    | FGF9   |  |

|  |         |        |  |
|--|---------|--------|--|
|  | FKBP4   | FGFBP1 |  |
|  | FKBP5   | FGFR1  |  |
|  | FKBP8   | FGFR2  |  |
|  | FKBP9   | FHL1   |  |
|  | FLAD1   | FIGN   |  |
|  | FLII    | FIP1L1 |  |
|  | FLNA    | FIZ1   |  |
|  | FLNB    | FJX1   |  |
|  | FLOT2   | FKBP1A |  |
|  | FLRT2   | FKBP5  |  |
|  | FLRT3   | FKBP8  |  |
|  | FLYWCH1 | FLCN   |  |
|  | FMNL2   | FLI1   |  |
|  | FN1     | FLNA   |  |
|  | FNBP1L  | FLNC   |  |
|  | FNBP4   | FLRT2  |  |
|  | FNDC3A  | FLT1   |  |
|  | FNDC4   | FLT3   |  |
|  | FNTA    | FLT3LG |  |
|  | FNTB    | FLT4   |  |
|  | FOCAD   | FMN2   |  |
|  | FOXK1   | FMNL1  |  |
|  | FOXK2   | FMNL2  |  |
|  | FOXM1   | FMR1   |  |
|  | FOXP4   | FNBP1  |  |
|  | FPGS    | FNBP1L |  |
|  | FRAT1   | FNBP4  |  |
|  | FREM2   | FNDC3A |  |
|  | FRMD8   | FNDC3B |  |
|  | FRS2    | FNDC4  |  |
|  | FSCN1   | FNDC5  |  |
|  | FSTL1   | FNIP1  |  |
|  | FTH1    | FNIP2  |  |
|  | FTL     | FNTA   |  |
|  | FTSJ3   | FOSB   |  |
|  | FUBP1   | FOSL2  |  |
|  | FUBP3   | FOXA2  |  |
|  | FURIN   | FOXA3  |  |
|  | FUS     | FOXB1  |  |
|  | FXR1    | FOXC1  |  |
|  | FXR2    | FOXD1  |  |
|  | FXVD6   | FOXD3  |  |
|  | FYN     | FOXE1  |  |
|  | FYTTD1  | FOXF1  |  |
|  | FZD1    | FOXF2  |  |
|  | FZD10   | FOXG1  |  |
|  | FZD2    | FOXI1  |  |
|  | FZD3    | FOXJ1  |  |
|  | FZD7    | FOXJ2  |  |
|  | FZR1    | FOXJ3  |  |
|  | G3BP1   | FOXK1  |  |

|  |         |             |  |
|--|---------|-------------|--|
|  | G3BP2   | FOXL2       |  |
|  | G6PC3   | FOXN1       |  |
|  | G6PD    | FOXN3       |  |
|  | GAB1    | FOXN4       |  |
|  | GABARAP | FOXO1       |  |
|  | GABPA   | FOXO3       |  |
|  | GAK     | FOXO4       |  |
|  | GALK1   | FOXP1       |  |
|  | GALNT1  | FOXP2       |  |
|  | GALNT16 | FOXP3       |  |
|  | GALNT2  | FOXP4       |  |
|  | GANAB   | FOXQ1       |  |
|  | GAP43   | FRMD4A      |  |
|  | GAPDH   | FRMD5       |  |
|  | GAPVD1  | FRMD7       |  |
|  | GAR1    | FRMPD4      |  |
|  | GARS    | FRS2        |  |
|  | GART    | FRS3        |  |
|  | GAS1    | FRY         |  |
|  | GATAD1  | FRYL        |  |
|  | GATAD2A | FSCN1       |  |
|  | GATAD2B | FST         |  |
|  | GBA2    | FSTL1       |  |
|  | GBF1    | FSTL3       |  |
|  | GCLC    | FTSJ1       |  |
|  | GCN1L1  | FUBP1       |  |
|  | GCSH    | FUBP3       |  |
|  | GDE1    | FURIN       |  |
|  | GDI1    | FUS         |  |
|  | GDI2    | FXR1        |  |
|  | GEMIN4  | FXR2        |  |
|  | GEMIN5  | FXYD6       |  |
|  | GEMIN7  | FXYD6-FXYD2 |  |
|  | GET4    | FYN         |  |
|  | GFM1    | FZD2        |  |
|  | GGA1    | FZD4        |  |
|  | GGA2    | FZD5        |  |
|  | GGA3    | FZD8        |  |
|  | GGNBP2  | FZR1        |  |
|  | GHITM   | G2E3        |  |
|  | GID4    | G3BP2       |  |
|  | GIGYF1  | G6PD        |  |
|  | GINS1   | GAB2        |  |
|  | GINS2   | GAB3        |  |
|  | GINS4   | GABARAPL1   |  |
|  | GIPC1   | GABBR1      |  |
|  | GIT1    | GABBR2      |  |
|  | GJA1    | GABPA       |  |
|  | GJC1    | GABPB1      |  |
|  | GLDC    | GABRA1      |  |
|  | GLE1    | GABRA2      |  |

|  |           |         |  |
|--|-----------|---------|--|
|  | GLG1      | GABRA4  |  |
|  | GLI1      | GABRA5  |  |
|  | GLI2      | GABRB1  |  |
|  | GLI3      | GABRB2  |  |
|  | GLIS2     | GABRB3  |  |
|  | GLO1      | GABRD   |  |
|  | GLOD4     | GABRG2  |  |
|  | GLRX5     | GABRG3  |  |
|  | GLS       | GAD2    |  |
|  | GLTP      | GADD45G |  |
|  | GLTSCR1   | GAL3ST1 |  |
|  | GLTSCR2   | GALNT13 |  |
|  | GLUD1     | GANAB   |  |
|  | GLUD2     | GAPVD1  |  |
|  | GLUL      | GAS1    |  |
|  | GLYR1     | GAS2L1  |  |
|  | GMFB      | GAS7    |  |
|  | GMNN      | GATA1   |  |
|  | GMPPA     | GATA2   |  |
|  | GMPR2     | GATA3   |  |
|  | GMPS      | GATA6   |  |
|  | GNA11     | GATAD2A |  |
|  | GNA12     | GATAD2B |  |
|  | GNA13     | GBX2    |  |
|  | GNAI2     | GCH1    |  |
|  | GNAI3     | GCK     |  |
|  | GNAQ      | GCLM    |  |
|  | GNAS      | GCM1    |  |
|  | GNB1      | GCN1L1  |  |
|  | GNB2      | GDA     |  |
|  | GNB2L1    | GDF11   |  |
|  | GNG2      | GDF5    |  |
|  | GNG5      | GDF6    |  |
|  | GNL1      | GDF7    |  |
|  | GNL2      | GDI1    |  |
|  | GNL3      | GDI2    |  |
|  | GNL3L     | GEMIN7  |  |
|  | GNPAT     | GEMIN8  |  |
|  | GNPDA1    | GET4    |  |
|  | GNS       | GFPT1   |  |
|  | GOLGA2    | GFY     |  |
|  | GOLGA6A   | GGA1    |  |
|  | GOLGA6B   | GGH     |  |
|  | GOLGA6C   | GGNBP1  |  |
|  | GOLGA6D   | GGNBP2  |  |
|  | GOLGA6L1  | GGT7    |  |
|  | GOLGA6L10 | GID4    |  |
|  | GOLGA6L6  | GID8    |  |
|  | GOLGA6L9  | GIGYF2  |  |
|  | GOLGA8A   | GIT1    |  |
|  | GOLGA8B   | GIT2    |  |

|  |         |           |  |
|--|---------|-----------|--|
|  | GOLGA8F | GJB1      |  |
|  | GOLGA8G | GJC1      |  |
|  | GOLM1   | GK        |  |
|  | GOLPH3  | GLA       |  |
|  | GOLPH3L | GLCE      |  |
|  | GOLT1B  | GLG1      |  |
|  | GON4L   | GLI2      |  |
|  | GORASP2 | GLI3      |  |
|  | GOSR2   | GLIS2     |  |
|  | GOT1    | GLRA2     |  |
|  | GOT2    | GLRX5     |  |
|  | GPAA1   | GLS       |  |
|  | GPALPP1 | GLTSCR1   |  |
|  | GPAM    | GLTSCR1L  |  |
|  | GPATCH4 | GLUL      |  |
|  | GPATCH8 | GLYR1     |  |
|  | GPBP1   | GMDS      |  |
|  | GPC1    | GMEB1     |  |
|  | GPC2    | GMEB2     |  |
|  | GPC3    | GMPS      |  |
|  | GPC4    | GNA11     |  |
|  | GPI     | GNA12     |  |
|  | GPM6B   | GNA13     |  |
|  | GPN1    | GNAI1     |  |
|  | GPN3    | GNAI2     |  |
|  | GPR107  | GNAL      |  |
|  | GPR124  | GNAO1     |  |
|  | GPR125  | GNAQ      |  |
|  | GPR56   | GNAS      |  |
|  | GPRASP1 | GNAZ      |  |
|  | GPRC5B  | GNB1      |  |
|  | GPRC5C  | GNB2      |  |
|  | GPS1    | GNB2L1    |  |
|  | GPS2    | GNG11     |  |
|  | GPSM1   | GNG12     |  |
|  | GPSM2   | GNG2      |  |
|  | GPX1    | GNG3      |  |
|  | GPX3    | GNL1      |  |
|  | GRAMD1A | GNL3L     |  |
|  | GRB10   | GOLGA2    |  |
|  | GRB2    | GOLGA6L18 |  |
|  | GREB1   | GOLT1B    |  |
|  | GRIK5   | GON4L     |  |
|  | GRINA   | GORASP2   |  |
|  | GRK6    | GP1BB     |  |
|  | GRN     | GPATCH8   |  |
|  | GRSF1   | GPC3      |  |
|  | GRWD1   | GPC4      |  |
|  | GSE1    | GPER1     |  |
|  | GSK3A   | GPHN      |  |
|  | GSK3B   | GPKOW     |  |

|  |          |         |  |
|--|----------|---------|--|
|  | GSPT1    | GPM6A   |  |
|  | GSTA4    | GPR101  |  |
|  | GSTM3    | GPR137  |  |
|  | GSTP1    | GPR143  |  |
|  | GTF2B    | GPR173  |  |
|  | GTF2E1   | GPR26   |  |
|  | GTF2E2   | GPR50   |  |
|  | GTF2F1   | GPR61   |  |
|  | GTF2H1   | GPR64   |  |
|  | GTF2H3   | GPR85   |  |
|  | GTF2H4   | GPR88   |  |
|  | GTF2I    | GPRASP2 |  |
|  | GTF2IRD1 | GPRIN1  |  |
|  | GTF3A    | GPS1    |  |
|  | GTF3C1   | GRAMD1B |  |
|  | GTF3C2   | GRAMD4  |  |
|  | GTF3C3   | GRASP   |  |
|  | GTF3C4   | GRB10   |  |
|  | GTF3C5   | GRB2    |  |
|  | GTF3C6   | GREB1L  |  |
|  | GTPBP1   | GRHL2   |  |
|  | GTPBP2   | GRHL3   |  |
|  | GTPBP4   | GRIA1   |  |
|  | GTSE1    | GRIA2   |  |
|  | GUCD1    | GRIA3   |  |
|  | GUK1     | GRID1   |  |
|  | GYG1     | GRID2   |  |
|  | GYLTL1B  | GRIK2   |  |
|  | GYS1     | GRIK3   |  |
|  | GZF1     | GRIK5   |  |
|  | H1FX     | GRIN1   |  |
|  | H2AFV    | GRIN2A  |  |
|  | H2AFX    | GRIN2B  |  |
|  | H2AFY    | GRIN2D  |  |
|  | H2AFY2   | GRIP1   |  |
|  | H2AFZ    | GRIPAP1 |  |
|  | H3F3A    | GRK5    |  |
|  | H3F3B    | GRM3    |  |
|  | HADH     | GRM4    |  |
|  | HADHA    | GRM5    |  |
|  | HAPLN1   | GRM7    |  |
|  | HARS     | GSE1    |  |
|  | HAT1     | GSG1L   |  |
|  | HAUS2    | GSK3A   |  |
|  | HAUS6    | GSK3B   |  |
|  | HAUS7    | GSPT1   |  |
|  | HBA1     | GSPT2   |  |
|  | HBA2     | GSTT2B  |  |
|  | HBE1     | GTF2A1  |  |
|  | HBG1     | GTF2E1  |  |
|  | HBG2     | GTF2H1  |  |



|  |          |          |  |
|--|----------|----------|--|
|  | HBP1     | GTF2I    |  |
|  | HBS1L    | GTF2IRD1 |  |
|  | HBZ      | GTF3C1   |  |
|  | HCFC1    | GTF3C2   |  |
|  | HDAC2    | GTPBP1   |  |
|  | HDAC3    | GTPBP4   |  |
|  | HDAC6    | GULP1    |  |
|  | HDAC7    | H1FO     |  |
|  | HDDC3    | H2AFY    |  |
|  | HDGFRP2  | H2AFY2   |  |
|  | HDLBP    | H2AFZ    |  |
|  | HEATR1   | H3F3B    |  |
|  | HEATR2   | HAPLN1   |  |
|  | HEATR3   | HAS2     |  |
|  | HECTD1   | HAS3     |  |
|  | HECTD4   | HAT1     |  |
|  | HELLS    | HAUS7    |  |
|  | HELZ     | HBG1     |  |
|  | HERC2    | HBG2     |  |
|  | HES1     | HCCS     |  |
|  | HES5     | HCFC1    |  |
|  | HES6     | HCFC2    |  |
|  | HGS      | HCN1     |  |
|  | HIAT1    | HCN4     |  |
|  | HIBADH   | HDAC1    |  |
|  | HIC2     | HDAC2    |  |
|  | HIF1A    | HDAC3    |  |
|  | HIF1AN   | HDAC4    |  |
|  | HIGD2A   | HDAC5    |  |
|  | HINT1    | HDAC6    |  |
|  | HIP1     | HDAC7    |  |
|  | HIPK1    | HDAC8    |  |
|  | HIPK2    | HDAC9    |  |
|  | HIRA     | HDGFRP2  |  |
|  | HIRIP3   | HDGFRP3  |  |
|  | HIST3H2A | HDLBP    |  |
|  | HJURP    | HEATR1   |  |
|  | HK2      | HECA     |  |
|  | HMBS     | HECTD1   |  |
|  | HMG20B   | HECTD2   |  |
|  | HMGA1    | HECTD4   |  |
|  | HMGA2    | HECW1    |  |
|  | HMGB1    | HECW2    |  |
|  | HMGB2    | HELLS    |  |
|  | HMGB3    | HELZ     |  |
|  | HMGCR    | HEPACAM  |  |
|  | HMGN1    | HERC1    |  |
|  | HMGN2    | HERC2    |  |
|  | HMGN4    | HERC4    |  |
|  | HMGXB3   | HERPUD1  |  |
|  | HMGXB4   | HERPUD2  |  |

|  |                |           |  |
|--|----------------|-----------|--|
|  | HMMR           | HES1      |  |
|  | HMOX2          | HES7      |  |
|  | HN1            | HEXIM1    |  |
|  | HN1L           | HEY2      |  |
|  | HNRNPA0        | HGF       |  |
|  | HNRNPA1        | HHEX      |  |
|  | HNRNPA2B1      | HHIP      |  |
|  | HNRNPA3        | HIAT1     |  |
|  | HNRNPAB        | HIC2      |  |
|  | HNRNPC         | HIF1A     |  |
|  | HNRNPD         | HIP1      |  |
|  | HNRNPD1        | HIPK1     |  |
|  | HNRNPF         | HIPK2     |  |
|  | HNRNPH1        | HIRA      |  |
|  | HNRNPH2        | HIST1H1B  |  |
|  | HNRNPH3        | HIST1H2AC |  |
|  | HNRNPK         | HIST1H3J  |  |
|  | HNRNPL         | HIST2H2AB |  |
|  | HNRNPLL        | HIST2H2BE |  |
|  | HNRNPM         | HIST3H2A  |  |
|  | HNRNPR         | HIVEP1    |  |
|  | HNRNPU         | HIVEP2    |  |
|  | HNRNPUL1       | HIVEP3    |  |
|  | HNRNPUL2       | HK1       |  |
|  | HNRNPUL2-BSCL2 | HLA-DRA   |  |
|  | HOMER3         | HLF       |  |
|  | HP1BP3         | HLX       |  |
|  | HPRT1          | HM13      |  |
|  | HS2ST1         | HMBOX1    |  |
|  | HS6ST1         | HMBS      |  |
|  | HSBP1          | HMG20A    |  |
|  | HSD11B2        | HMG20B    |  |
|  | HSD17B10       | HMGA1     |  |
|  | HSD17B12       | HMGA2     |  |
|  | HSD17B4        | HMGB1     |  |
|  | HSD17B8        | HMGB2     |  |
|  | HSD3B7         | HMGB3     |  |
|  | HSDL1          | HMGCR     |  |
|  | HSF1           | HMGCS1    |  |
|  | HSP90AA1       | HMG2      |  |
|  | HSP90AB1       | HMGXB3    |  |
|  | HSP90B1        | HMX1      |  |
|  | HSPA4          | HMX3      |  |
|  | HSPA5          | HNF1A     |  |
|  | HSPA8          | HNF1B     |  |
|  | HSPA9          | HNRNPA0   |  |
|  | HSPBP1         | HNRNPA1   |  |
|  | HSPD1          | HNRNPA2B1 |  |
|  | HSPE1          | HNRNPA3   |  |
|  | HSPG2          | HNRNPAB   |  |
|  | HSPH1          | HNRNPC    |  |

|  |         |            |  |
|--|---------|------------|--|
|  | HTATSF1 | HNRNPD     |  |
|  | HTRA2   | HNRNPF     |  |
|  | HTT     | HNRNPH1    |  |
|  | HUNK    | HNRNPH2    |  |
|  | HUWE1   | HNRNPH3    |  |
|  | HYAL2   | HNRNPK     |  |
|  | HYOU1   | HNRNPL     |  |
|  | HYPK    | HNRNPLL    |  |
|  | IARS    | HNRNPM     |  |
|  | IARS2   | HNRNPR     |  |
|  | ICMT    | HNRNPU     |  |
|  | ICT1    | HNRNPUL1   |  |
|  | ID1     | HNRNPUL2   |  |
|  | ID2     | HOMER1     |  |
|  | ID3     | HOMER3     |  |
|  | ID4     | HOOK3      |  |
|  | IDE     | HORMAD1    |  |
|  | IDH1    | HOXA10     |  |
|  | IDH2    | HOXA11     |  |
|  | IDH3A   | HOXA13     |  |
|  | IDH3B   | HOXA3      |  |
|  | IDH3G   | HOXB3      |  |
|  | IDI1    | HOXB5      |  |
|  | IER2    | HOXB8      |  |
|  | IER5L   | HOXC6      |  |
|  | IFNAR1  | HP1BP3     |  |
|  | IFRD1   | HPCA       |  |
|  | IFRD2   | HPCAL1     |  |
|  | IFRG15  | HPN        |  |
|  | IFT140  | HPRT1      |  |
|  | IFT172  | HS2ST1     |  |
|  | IFT52   | HS3ST4     |  |
|  | IFT74   | HS6ST1     |  |
|  | IGDCC3  | HS6ST3     |  |
|  | IGF1R   | HSD17B10   |  |
|  | IGF2    | HSF1       |  |
|  | IGF2BP1 | HSF2       |  |
|  | IGF2BP2 | HSF5       |  |
|  | IGF2BP3 | HSP90AA1   |  |
|  | IGF2R   | HSP90AB1   |  |
|  | IGFBP2  | HSP90B1    |  |
|  | IGFBP3  | HSPA12A    |  |
|  | IGFBP4  | HSPA14     |  |
|  | IGFBP5  | HSPA4      |  |
|  | IGSF9   | HSPA5      |  |
|  | IK      | HSPA8      |  |
|  | IKBKAP  | HSPA9      |  |
|  | IKBKB   | HSPD1      |  |
|  | IL17RD  | HSPE1      |  |
|  | IL6ST   | HSPE1-MOB4 |  |
|  | ILDR2   | HSPH1      |  |

|  |            |          |  |
|--|------------|----------|--|
|  | ILF2       | HTATSF1  |  |
|  | ILF3       | HTR2A    |  |
|  | ILK        | HTT      |  |
|  | IMMT       | HUNK     |  |
|  | IMP4       | HUWE1    |  |
|  | IMPA1      | HVCN1    |  |
|  | IMPACT     | HYOU1    |  |
|  | IMPAD1     | ICMT     |  |
|  | IMPDH1     | ID2      |  |
|  | INA        | ID3      |  |
|  | INCENP     | IDH2     |  |
|  | ING1       | IDS      |  |
|  | ING4       | IDS      |  |
|  | INIP       | IER2     |  |
|  | INO80B     | IER3     |  |
|  | INPP5E     | IER5     |  |
|  | INPPL1     | IER5L    |  |
|  | INTS1      | IFFO2    |  |
|  | INTS2      | IFNGR2   |  |
|  | INTS3      | IGBP1    |  |
|  | INTS4      | IGF1R    |  |
|  | INTS5      | IGF2BP1  |  |
|  | INTS7      | IGF2BP3  |  |
|  | INTS8      | IGF2R    |  |
|  | IP6K1      | IGFBP3   |  |
|  | IP6K2      | IGFBP5   |  |
|  | IPO11      | IGSF1    |  |
|  | IPO13      | IGSF9B   |  |
|  | IPO4       | IKBKB    |  |
|  | IPO5       | IKZF1    |  |
|  | IPO7       | IKZF2    |  |
|  | IPO9       | IKZF3    |  |
|  | IQGAP3     | IKZF4    |  |
|  | IQSEC1     | IKZF5    |  |
|  | IRAK1      | IL13RA1  |  |
|  | IREB2      | IL15     |  |
|  | IRF2BP1    | IL1RAPL1 |  |
|  | IRS2       | IL1RAPL2 |  |
|  | IRS4       | IL21     |  |
|  | IRX3       | IL21R    |  |
|  | ISCA2      | IL27     |  |
|  | ISG20L2    | IL2RG    |  |
|  | ISOC1      | IL34     |  |
|  | IST1       | IL6ST    |  |
|  | ISY1       | IL7      |  |
|  | ISY1-RAB43 | ILD2R2   |  |
|  | ISYNA1     | ILF2     |  |
|  | ITFG1      | ILF3     |  |
|  | ITFG3      | ILKAP    |  |
|  | ITGA5      | INCENP   |  |
|  | ITGB1      | INF2     |  |

|  |          |            |  |
|--|----------|------------|--|
|  | ITGB5    | ING2       |  |
|  | ITM2A    | ING3       |  |
|  | ITM2B    | ING5       |  |
|  | ITM2C    | INHBA      |  |
|  | ITSN1    | INHBB      |  |
|  | IVD      | INO80      |  |
|  | IVNS1ABP | INO80B     |  |
|  | JAG1     | INO80D     |  |
|  | JAGN1    | INPP4A     |  |
|  | JAK1     | INPP4B     |  |
|  | JAM3     | INPP5A     |  |
|  | JARID2   | INPP5D     |  |
|  | JKAMP    | INSM2      |  |
|  | JMJD6    | INTS10     |  |
|  | JMJD8    | INTS12     |  |
|  | JMY      | INTS2      |  |
|  | JUND     | INTS3      |  |
|  | JUP      | INTS5      |  |
|  | KANK2    | INTS6      |  |
|  | KANSL1   | INTS8      |  |
|  | KANSL2   | IP6K1      |  |
|  | KANSL3   | IP6K2      |  |
|  | KARS     | IPMK       |  |
|  | KAT2A    | IPO13      |  |
|  | KAT5     | IPO5       |  |
|  | KAT6A    | IPO7       |  |
|  | KAT7     | IPO9       |  |
|  | KATNA1   | IPPK       |  |
|  | KBTBD2   | IQGAP1     |  |
|  | KBTBD4   | IQSEC1     |  |
|  | KCMF1    | IQSEC2     |  |
|  | KCTD10   | IRAK1      |  |
|  | KCTD15   | IREB2      |  |
|  | KCTD17   | IRF1       |  |
|  | KCTD20   | IRF2       |  |
|  | KCTD5    | IRF2BP1    |  |
|  | KDEL1    | IRF2BP2    |  |
|  | KDELR1   | IRF2BPL    |  |
|  | KDELR2   | IRF4       |  |
|  | KDM1A    | IRF6       |  |
|  | KDM2A    | IRF8       |  |
|  | KDM3A    | IRF9       |  |
|  | KDM3B    | IRS2       |  |
|  | KDM4A    | IRS4       |  |
|  | KDM4B    | IRX3       |  |
|  | KDM5B    | IRX5       |  |
|  | KDM5C    | ISL1       |  |
|  | KDM6B    | ISY1       |  |
|  | KHDRBS1  | ISY1-RAB43 |  |
|  | KHDRBS3  | ITCH       |  |
|  | KHNYN    | ITGB1      |  |

|  |           |          |  |
|--|-----------|----------|--|
|  | KHSRP     | ITGB8    |  |
|  | KIAA0020  | ITM2B    |  |
|  | KIAA0100  | ITM2C    |  |
|  | KIAA0101  | ITPK1    |  |
|  | KIAA0195  | ITPKA    |  |
|  | KIAA0196  | ITPKB    |  |
|  | KIAA0226  | ITPR1    |  |
|  | KIAA0355  | ITSN1    |  |
|  | KIAA0368  | IVNS1ABP |  |
|  | KIAA0430  | IWS1     |  |
|  | KIAA0895L | JADE1    |  |
|  | KIAA0907  | JADE2    |  |
|  | KIAA0922  | JADE3    |  |
|  | KIAA0930  | JAG1     |  |
|  | KIAA0947  | JAG2     |  |
|  | KIAA1191  | JAK1     |  |
|  | KIAA1211  | JAK2     |  |
|  | KIAA1217  | JAKMIP1  |  |
|  | KIAA1279  | JAKMIP2  |  |
|  | KIAA1328  | JARID2   |  |
|  | KIAA1429  | JAZF1    |  |
|  | KIAA1432  | JMJD1C   |  |
|  | KIAA1524  | JMJD6    |  |
|  | KIAA1549  | JMY      |  |
|  | KIAA1551  | JPH1     |  |
|  | KIAA1715  | JPH3     |  |
|  | KIAA1731  | JPH4     |  |
|  | KIAA2013  | JUNB     |  |
|  | KIF11     | JUND     |  |
|  | KIF13B    | KAL1     |  |
|  | KIF15     | KALRN    |  |
|  | KIF18B    | KANSL1   |  |
|  | KIF1A     | KANSL1L  |  |
|  | KIF1B     | KANSL2   |  |
|  | KIF20A    | KANSL3   |  |
|  | KIF21A    | KAT2A    |  |
|  | KIF21B    | KAT2B    |  |
|  | KIF22     | KAT6A    |  |
|  | KIF23     | KAT6B    |  |
|  | KIF2A     | KAT7     |  |
|  | KIF2C     | KATNAL1  |  |
|  | KIF3A     | KATNBL1  |  |
|  | KIF4A     | KAZN     |  |
|  | KIF4B     | KBTBD2   |  |
|  | KIF5B     | KBTBD6   |  |
|  | KIF5C     | KCMF1    |  |
|  | KIFAP3    | KCNA2    |  |
|  | KIFC1     | KCNA3    |  |
|  | KIRREL    | KCNA4    |  |
|  | KLC1      | KCNAB2   |  |
|  | KLC2      | KCNB1    |  |

|  |         |          |  |
|--|---------|----------|--|
|  | KLF7    | KCNB2    |  |
|  | KLHDC10 | KCNC1    |  |
|  | KLHDC2  | KCND3    |  |
|  | KLHDC3  | KCNG2    |  |
|  | KLHL13  | KCNH1    |  |
|  | KLHL17  | KCNH2    |  |
|  | KLHL7   | KCNH3    |  |
|  | KLHL9   | KCNH4    |  |
|  | KM-PA-2 | KCNIP4   |  |
|  | KMT2A   | KCNJ3    |  |
|  | KMT2B   | KCNJ4    |  |
|  | KMT2D   | KCNJ6    |  |
|  | KMT2E   | KCNK12   |  |
|  | KNOP1   | KCNK3    |  |
|  | KNSTRN  | KCNK9    |  |
|  | KPNA1   | KCNMA1   |  |
|  | KPNA2   | KCNMB2   |  |
|  | KPNA3   | KCNMB4   |  |
|  | KPNA4   | KCNN1    |  |
|  | KPNA6   | KCNN2    |  |
|  | KPNB1   | KCNN3    |  |
|  | KRAS    | KCNQ2    |  |
|  | KRBA2   | KCNQ3    |  |
|  | KRI1    | KCNQ5    |  |
|  | KRTCAP2 | KCNV1    |  |
|  | KTI12   | KCTD1    |  |
|  | KTN1    | KCTD10   |  |
|  | L3MBTL2 | KCTD16   |  |
|  | LAMA1   | KDEL1R   |  |
|  | LAMB1   | KDM1A    |  |
|  | LAMB2   | KDM2A    |  |
|  | LAMC1   | KDM2B    |  |
|  | LAMP1   | KDM3A    |  |
|  | LAMTOR2 | KDM3B    |  |
|  | LAMTOR3 | KDM4A    |  |
|  | LAP3    | KDM4B    |  |
|  | LAPTM4A | KDM4E    |  |
|  | LAPTM4B | KDM5A    |  |
|  | LARP1   | KDM5C    |  |
|  | LARP7   | KDM5D    |  |
|  | LARS    | KDM6A    |  |
|  | LARS2   | KDM6B    |  |
|  | LAS1L   | KDM7A    |  |
|  | LASP1   | KDR      |  |
|  | LBH     | KHDRBS1  |  |
|  | LBR     | KHSRP    |  |
|  | LDB1    | KIAA0232 |  |
|  | LDHA    | KIAA0247 |  |
|  | LDLRAD3 | KIAA0355 |  |
|  | LEMD2   | KIAA0368 |  |
|  | LENG8   | KIAA0430 |  |

|  |        |           |  |
|--|--------|-----------|--|
|  | LEO1   | KIAA0907  |  |
|  | LEPROT | KIAA0922  |  |
|  | LETM1  | KIAA0947  |  |
|  | LFNG   | KIAA1211L |  |
|  | LGALSL | KIAA1239  |  |
|  | LHX2   | KIAA1244  |  |
|  | LIG1   | KIAA1429  |  |
|  | LIG3   | KIAA1468  |  |
|  | LIMA1  | KIAA1549  |  |
|  | LIMD1  | KIAA1671  |  |
|  | LIMD2  | KIAA2018  |  |
|  | LIMS1  | KIAA2022  |  |
|  | LIMS3  | KIAA2026  |  |
|  | LIMS3L | KIF11     |  |
|  | LIN28A | KIF13A    |  |
|  | LIN28B | KIF1A     |  |
|  | LIN54  | KIF1B     |  |
|  | LIN7C  | KIF1C     |  |
|  | LITAF  | KIF23     |  |
|  | LIX1L  | KIF26B    |  |
|  | LLGL1  | KIF2A     |  |
|  | LLPH   | KIF3A     |  |
|  | LMAN1  | KIF3C     |  |
|  | LMAN2  | KIF4A     |  |
|  | LMF2   | KIF5A     |  |
|  | LMNB1  | KIF5B     |  |
|  | LMNB2  | KIF5C     |  |
|  | LMO4   | KIRREL    |  |
|  | LONP1  | KIRREL3   |  |
|  | LOXL2  | KIT       |  |
|  | LPAR1  | KITLG     |  |
|  | LPCAT1 | KLC2      |  |
|  | LPCAT3 | KLF12     |  |
|  | LPHN1  | KLF2      |  |
|  | LPHN2  | KLF3      |  |
|  | LPPR3  | KLF4      |  |
|  | LRFN4  | KLF5      |  |
|  | LRIG1  | KLF6      |  |
|  | LRP1   | KLF7      |  |
|  | LRP10  | KLF9      |  |
|  | LRP3   | KLHDC10   |  |
|  | LRP5   | KLHDC3    |  |
|  | LRP6   | KLHL10    |  |
|  | LRPPRC | KLHL15    |  |
|  | LRRC40 | KLHL2     |  |
|  | LRRC41 | KLHL29    |  |
|  | LRRC42 | KLHL3     |  |
|  | LRRC47 | KLHL36    |  |
|  | LRRC4B | KLHL4     |  |
|  | LRRC58 | KLHL9     |  |
|  | LRRC59 | KM-PA-2   |  |



|  |           |           |  |
|--|-----------|-----------|--|
|  | LRRRC8A   | KMT2A     |  |
|  | LRRN1     | KMT2B     |  |
|  | LRWD1     | KMT2C     |  |
|  | LSG1      | KMT2D     |  |
|  | LSM12     | KMT2E     |  |
|  | LSM14A    | KPNA1     |  |
|  | LSM14B    | KPNA2     |  |
|  | LSM3      | KPNA3     |  |
|  | LSM4      | KPNA4     |  |
|  | LSR       | KPNA6     |  |
|  | LSS       | KPNB1     |  |
|  | LTN1      | KRBOX4    |  |
|  | LTV1      | KRT1      |  |
|  | LUC7L     | KRT18     |  |
|  | LUC7L3    | KRT5      |  |
|  | LUZP1     | KRTAP17-1 |  |
|  | LY6E      | KRTAP6-3  |  |
|  | LYAR      | KSR2      |  |
|  | LYPLA1    | L1CAM     |  |
|  | LYPLA2    | L3MBTL3   |  |
|  | LYPLAL1   | LAMC1     |  |
|  | LZTR1     | LAMP1     |  |
|  | LZTS2     | LAMTOR1   |  |
|  | M6PR      | LAMTOR3   |  |
|  | MAD1L1    | LAPTM5    |  |
|  | MAD2L1    | LARGE     |  |
|  | MAEA      | LARP1     |  |
|  | MAF1      | LARP4     |  |
|  | MAFG      | LARP4B    |  |
|  | MAGED1    | LARP6     |  |
|  | MAGED2    | LAS1L     |  |
|  | MAGOH     | LASP1     |  |
|  | MAGT1     | LATS1     |  |
|  | MAK16     | LATS2     |  |
|  | MAML1     | LBX1      |  |
|  | MAN1B1    | LCK       |  |
|  | MAN2A2    | LCOR      |  |
|  | MAN2B2    | LCORL     |  |
|  | MAN2C1    | LCP1      |  |
|  | MANF      | LCP2      |  |
|  | MAP1B     | LDB1      |  |
|  | MAP1LC3B2 | LDB2      |  |
|  | MAP1S     | LDLRAD4   |  |
|  | MAP2K1    | LDOC1     |  |
|  | MAP2K2    | LEF1      |  |
|  | MAP2K3    | LEMD2     |  |
|  | MAP2K4    | LEMD3     |  |
|  | MAP2K5    | LENG8     |  |
|  | MAP2K6    | LEO1      |  |
|  | MAP2K7    | LEPR      |  |
|  | MAP3K11   | LEPROTL1  |  |

|  |           |          |  |
|--|-----------|----------|--|
|  | MAP3K12   | LG11     |  |
|  | MAP3K3    | LHFP     |  |
|  | MAP3K7    | LHFPL3   |  |
|  | MAP4      | LHFPL4   |  |
|  | MAP4K4    | LHX2     |  |
|  | MAP7      | LHX5     |  |
|  | MAP7D1    | LHX6     |  |
|  | MAPK1     | LHX8     |  |
|  | MAPK11    | LHX9     |  |
|  | MAPK14    | LIF      |  |
|  | MAPK11P1L | LIMCH1   |  |
|  | MAPK3     | LIMK1    |  |
|  | MAPK6     | LIN28B   |  |
|  | MAPK7     | LIN52    |  |
|  | MAPK8IP1  | LIN54    |  |
|  | MAPK8IP3  | LIN7B    |  |
|  | MAPKAP1   | LIN9     |  |
|  | MAPKAPK2  | LINGO1   |  |
|  | MAPRE1    | LINGO2   |  |
|  | MAPRE2    | LIPT2    |  |
|  | 5-Mar     | LMNA     |  |
|  | 6-Mar     | LMNB1    |  |
|  | MARCKS    | LMNB2    |  |
|  | MARCKSL1  | LMO1     |  |
|  | MARK2     | LMO3     |  |
|  | MARK3     | LMO4     |  |
|  | MARK4     | LMOD1    |  |
|  | MARS      | LMTK2    |  |
|  | MASP2     | LMTK3    |  |
|  | MAST2     | LMX1A    |  |
|  | MAT2A     | LMX1B    |  |
|  | MAT2B     | LNPEP    |  |
|  | MATR3     | LOH12CR2 |  |
|  | MAU2      | LONP1    |  |
|  | MAZ       | LONRF1   |  |
|  | MBD1      | LOX      |  |
|  | MBD3      | LOXL1    |  |
|  | MBD6      | LPAR3    |  |
|  | MBTD1     | LPCAT3   |  |
|  | MBTPS1    | LPGAT1   |  |
|  | MCFD2     | LPHN1    |  |
|  | MCL1      | LPHN2    |  |
|  | MCM10     | LPHN3    |  |
|  | MCM2      | LPPR1    |  |
|  | MCM3      | LPPR4    |  |
|  | MCM3AP    | LRCH1    |  |
|  | MCM4      | LRCH2    |  |
|  | MCM5      | LRFN1    |  |
|  | MCM6      | LRFN3    |  |
|  | MCM7      | LRFN4    |  |
|  | MCMBP     | LRFN5    |  |

|  |        |         |  |
|--|--------|---------|--|
|  | MCRS1  | LRP1    |  |
|  | MCTS1  | LRP12   |  |
|  | MDC1   | LRP2    |  |
|  | MDH1   | LRP5    |  |
|  | MDH2   | LRP6    |  |
|  | MDK    | LRP8    |  |
|  | ME2    | LRR1    |  |
|  | MEA1   | LRR25   |  |
|  | MEAF6  | LRR4    |  |
|  | MED1   | LRR41   |  |
|  | MED12  | LRR47   |  |
|  | MED16  | LRR4B   |  |
|  | MED19  | LRR4C   |  |
|  | MED20  | LRR7    |  |
|  | MED21  | LRR8A   |  |
|  | MED22  | LRR8B   |  |
|  | MED23  | LRR8D   |  |
|  | MED24  | LRR1    |  |
|  | MED25  | LRR2    |  |
|  | MED4   | LRRM1   |  |
|  | MED6   | LRRM2   |  |
|  | MED8   | LRRM3   |  |
|  | MEGF6  | LRRM2   |  |
|  | MEGF8  | LSAMP   |  |
|  | MEIS2  | LSM11   |  |
|  | MELK   | LSM12   |  |
|  | MEMO1  | LSM14B  |  |
|  | MEN1   | LSM6    |  |
|  | MEPCE  | LTBP3   |  |
|  | MESDC2 | LUC7L3  |  |
|  | MEST   | LUZP1   |  |
|  | METAP2 | LYL1    |  |
|  | METRN  | LYN     |  |
|  | METT13 | LYPLA2  |  |
|  | METT16 | LYZL4   |  |
|  | METT17 | LZTS1   |  |
|  | METT23 | LZTS3   |  |
|  | METT2A | MACF1   |  |
|  | METT2B | MACROD1 |  |
|  | METT3  | MADCAM1 |  |
|  | METT9  | MAF     |  |
|  | MEX3A  | MAF1    |  |
|  | MEX3B  | MAFB    |  |
|  | MEX3C  | MAFG    |  |
|  | MEX3D  | MAFK    |  |
|  | MFAP1  | MAGEA11 |  |
|  | MFAP2  | MAGED1  |  |
|  | MFAP3  | MAGED2  |  |
|  | MFAP4  | MAGEE1  |  |
|  | MFF    | MAGEL2  |  |
|  | MFGE8  | MAG11   |  |

|  |           |           |  |
|--|-----------|-----------|--|
|  | MFN2      | MAG12     |  |
|  | MFSD1     | MAGOH     |  |
|  | MFSD10    | MAGT1     |  |
|  | MFSD5     | MAK16     |  |
|  | MGAT4B    | MAL       |  |
|  | MGEA5     | MALT1     |  |
|  | MGRN1     | MAML1     |  |
|  | MIB1      | MAML2     |  |
|  | MICU2     | MAML3     |  |
|  | MID1      | MAMLD1    |  |
|  | MIDN      | MAN1A2    |  |
|  | MIEF1     | MAOA      |  |
|  | MIER2     | MAOB      |  |
|  | MIF       | MAP1A     |  |
|  | MINK1     | MAP1B     |  |
|  | MINPP1    | MAP2      |  |
|  | MIR124-2  | MAP2K1    |  |
|  | MIS12     | MAP2K2    |  |
|  | MIS18A    | MAP2K4    |  |
|  | MIS18BP1  | MAP2K6    |  |
|  | MKI67     | MAP2K7    |  |
|  | MKL1      | MAP3K1    |  |
|  | MKNK2     | MAP3K10   |  |
|  | MLEC      | MAP3K12   |  |
|  | MLF2      | MAP3K13   |  |
|  | MLLT1     | MAP3K2    |  |
|  | MLLT10    | MAP3K3    |  |
|  | MLLT4     | MAP3K4    |  |
|  | MLXIP     | MAP3K5    |  |
|  | MMACHC    | MAP3K7    |  |
|  | MMADHC    | MAP3K8    |  |
|  | MMD       | MAP4      |  |
|  | MMGT1     | MAP4K1    |  |
|  | MMP14     | MAP4K4    |  |
|  | MMP15     | MAP4K5    |  |
|  | MMP2      | MAP7D1    |  |
|  | MMS19     | MAPK1     |  |
|  | MMS22L    | MAPK1IP1L |  |
|  | MN1       | MAPK6     |  |
|  | MOB1A     | MAPK8     |  |
|  | MOB3A     | MAPK8IP1  |  |
|  | MOB4      | MAPK8IP2  |  |
|  | MOGS      | MAPK8IP3  |  |
|  | MORC2     | MAPKAP1   |  |
|  | MORF4L2   | MAPKAPK2  |  |
|  | MPDU1     | MAPRE1    |  |
|  | MPDZ      | MAPRE2    |  |
|  | MPHOSPH10 | MAPRE3    |  |
|  | MPHOSPH8  | MARK1     |  |
|  | MPI       | MARK2     |  |
|  | MPND      | MARK4     |  |

|  |                |        |  |
|--|----------------|--------|--|
|  | MPP2           | MAST1  |  |
|  | MPP6           | MAST3  |  |
|  | MPRIP          | MAT2A  |  |
|  | MPV17          | MATR3  |  |
|  | MPZL1          | MAU2   |  |
|  | MRC2           | MAX    |  |
|  | MRGBP          | MAZ    |  |
|  | MRPL10         | MBD1   |  |
|  | MRPL12         | MBD3   |  |
|  | MRPL18         | MBD5   |  |
|  | MRPL2          | MBD6   |  |
|  | MRPL20         | MBNL1  |  |
|  | MRPL22         | MBNL3  |  |
|  | MRPL24         | MBOAT2 |  |
|  | MRPL28         | MBTD1  |  |
|  | MRPL30         | MBTPS2 |  |
|  | MRPL34         | MCF2   |  |
|  | MRPL37         | MCL1   |  |
|  | MRPL38         | MCM6   |  |
|  | MRPL39         | MCMBP  |  |
|  | MRPL4          | MCTS1  |  |
|  | MRPL40         | MCU    |  |
|  | MRPL45         | MDGA1  |  |
|  | MRPL49         | MDGA2  |  |
|  | MRPL50         | MDGA2  |  |
|  | MRPL54         | MDH1   |  |
|  | MRPL9          | MDM2   |  |
|  | MRPS10         | MDM4   |  |
|  | MRPS15         | MECOM  |  |
|  | MRPS17         | MECP2  |  |
|  | MRPS18B        | MED1   |  |
|  | MRPS2          | MED12  |  |
|  | MRPS21         | MED12L |  |
|  | MRPS27         | MED13  |  |
|  | MRPS30         | MED13L |  |
|  | MRPS35         | MED14  |  |
|  | MRPS7          | MED15  |  |
|  | MSANTD2        | MED19  |  |
|  | MSANTD3        | MED26  |  |
|  | MSANTD3-TMEFF1 | MEF2A  |  |
|  | MSANTD4        | MEF2D  |  |
|  | MSH2           | MEGF9  |  |
|  | MSH6           | MEIS1  |  |
|  | MSI1           | MEIS2  |  |
|  | MSI2           | MEMO1  |  |
|  | MSL1           | MEN1   |  |
|  | MSL2           | MEOX2  |  |
|  | MSL3           | MEPCE  |  |
|  | MSMP           | MESDC1 |  |
|  | MSN            | MESDC2 |  |
|  | MSTO1          | MET    |  |

|  |         |          |  |
|--|---------|----------|--|
|  | MSX1    | METRNL   |  |
|  | MTA1    | METTLL16 |  |
|  | MTA2    | METTLL9  |  |
|  | MTAP    | MEX3A    |  |
|  | MTCH1   | MEX3B    |  |
|  | MTCH2   | MEX3C    |  |
|  | MTDH    | MEX3D    |  |
|  | MTF2    | MFAP1    |  |
|  | MTFR1   | MFAP3L   |  |
|  | MTFR1L  | MFN2     |  |
|  | MTHFD1  | MGA      |  |
|  | MTHFD1L | MGAT1    |  |
|  | MTHFD2  | MGAT4B   |  |
|  | MTMR14  | MGAT5    |  |
|  | MTMR3   | MGEA5    |  |
|  | MTMR4   | MICAL3   |  |
|  | MTMR9   | MID1     |  |
|  | MTOR    | MID1IP1  |  |
|  | MTPN    | MIEN1    |  |
|  | MTSS1L  | MIER2    |  |
|  | MTX1    | MIER3    |  |
|  | MTX2    | MINK1    |  |
|  | MUM1    | MINOS1   |  |
|  | MUT     | MITF     |  |
|  | MVB12B  | MKL1     |  |
|  | MYADM   | MKL2     |  |
|  | MYBBP1A | MKLN1    |  |
|  | MYBL2   | MKRN1    |  |
|  | MYC     | MKX      |  |
|  | MYCBP2  | MLEC     |  |
|  | MYCL    | MLF2     |  |
|  | MYCN    | MLLT1    |  |
|  | MYEF2   | MLLT10   |  |
|  | MYH10   | MLLT11   |  |
|  | MYH9    | MLLT3    |  |
|  | MYL12B  | MLLT4    |  |
|  | MYO10   | MLLT6    |  |
|  | MYO5A   | MLXIP    |  |
|  | MYO9B   | MMGT1    |  |
|  | MZT1    | MMP14    |  |
|  | N4BP1   | MMP16    |  |
|  | NAA11   | MMP2     |  |
|  | NAA15   | MMP24    |  |
|  | NAA20   | MN1      |  |
|  | NAA35   | MNT      |  |
|  | NAA38   | MXN1     |  |
|  | NAA40   | MOB1A    |  |
|  | NAA50   | MOB4     |  |
|  | NAA60   | MOBP     |  |
|  | NABP2   | MON2     |  |
|  | NACA2   | MORC2    |  |

|  |         |           |  |
|--|---------|-----------|--|
|  | NACC1   | MORC3     |  |
|  | NADK    | MORC4     |  |
|  | NADK2   | MORF4L1   |  |
|  | NAE1    | MORF4L2   |  |
|  | NAMPT   | MORN4     |  |
|  | NAP1L1  | MOS       |  |
|  | NAP1L4  | MOSPD1    |  |
|  | NAPA    | MOSPD2    |  |
|  | NARF    | MOV10     |  |
|  | NARS    | MPC2      |  |
|  | NASP    | MPHOSPH10 |  |
|  | NAT10   | MPP1      |  |
|  | NAV1    | MPP6      |  |
|  | NBR1    | MPPED2    |  |
|  | NCAPD2  | MPRIP     |  |
|  | NCAPD3  | MRAS      |  |
|  | NCAPG   | MRC1      |  |
|  | NCAPG2  | MRC1L1    |  |
|  | NCAPH   | MRC2      |  |
|  | NCAPH2  | MRGBP     |  |
|  | NCBP1   | MRPL27    |  |
|  | NCBP2   | MRPL41    |  |
|  | NCDN    | MRTO4     |  |
|  | NCKAP1  | MSANTD1   |  |
|  | NCL     | MSANTD2   |  |
|  | NCLN    | MSH2      |  |
|  | NCOA3   | MSI1      |  |
|  | NCOA5   | MSI2      |  |
|  | NCOA6   | MSL1      |  |
|  | NCOR1   | MSL2      |  |
|  | NCOR2   | MSL3      |  |
|  | NCS1    | MSN       |  |
|  | NCSTN   | MSTN      |  |
|  | NDC1    | MTA1      |  |
|  | NDC80   | MTA2      |  |
|  | NDE1    | MTCH1     |  |
|  | NDFIP1  | MTF1      |  |
|  | NDN     | MTF2      |  |
|  | NDOR1   | MTM1      |  |
|  | NDST1   | MTMR1     |  |
|  | NDUFA1  | MTMR12    |  |
|  | NDUFA10 | MTMR3     |  |
|  | NDUFA12 | MTMR4     |  |
|  | NDUFA2  | MTOR      |  |
|  | NDUFA4  | MTPAP     |  |
|  | NDUFA6  | MTPN      |  |
|  | NDUFA7  | MTSS1     |  |
|  | NDUFA8  | MTSS1L    |  |
|  | NDUFA9  | MTUS2     |  |
|  | NDUFB3  | MUC5B     |  |
|  | NDUFB5  | MVB12B    |  |

|  |           |         |  |
|--|-----------|---------|--|
|  | NDUFB6    | MXD4    |  |
|  | NDUFB7    | MYB     |  |
|  | NDUFB8    | MYBL1   |  |
|  | NDUFB9    | MYC     |  |
|  | NDUFS1    | MYCBP   |  |
|  | NDUFS2    | MYCBP2  |  |
|  | NDUFS6    | MYCN    |  |
|  | NDUFS7    | MYEF2   |  |
|  | NDUFS8    | MYH10   |  |
|  | NDUFV1    | MYH11   |  |
|  | NDUFV2    | MYH9    |  |
|  | NECAB2    | MYLPF   |  |
|  | NEDD1     | MYNN    |  |
|  | NEDD4     | MYO16   |  |
|  | NEDD8     | MYO18A  |  |
|  | NEFL      | MYO5A   |  |
|  | NEFM      | MYO9B   |  |
|  | NEK2      | MYOG    |  |
|  | NEK6      | MYPOP   |  |
|  | NEK9      | MYRF    |  |
|  | NELFA     | MYT1    |  |
|  | NELFB     | MYT1L   |  |
|  | NELFCD    | N4BP1   |  |
|  | NELFE     | N4BP2L1 |  |
|  | NEO1      | NAA10   |  |
|  | NES       | NAA15   |  |
|  | NET1      | NAA25   |  |
|  | NEURL4    | NAA30   |  |
|  | NF2       | NAA35   |  |
|  | NFATC3    | NAA50   |  |
|  | NFE2L1    | NAA60   |  |
|  | NFKB1     | NAA60   |  |
|  | NFX1      | NAB2    |  |
|  | NFYA      | NABP2   |  |
|  | NGFRAP1   | NACC1   |  |
|  | NHP2      | NAF1    |  |
|  | NHP2L1    | NAMPT   |  |
|  | NID1      | NANOG   |  |
|  | NID2      | NANOS1  |  |
|  | NIF3L1    | NAP1L1  |  |
|  | NIFK      | NAP1L2  |  |
|  | NIPSNAP1  | NAP1L4  |  |
|  | NIPSNAP3A | NAP1L5  |  |
|  | NISCH     | NASP    |  |
|  | NKAIN1    | NAT8L   |  |
|  | NKIRAS2   | NAV1    |  |
|  | NKTR      | NAV2    |  |
|  | NLGN2     | NAV3    |  |
|  | NLK       | NBEA    |  |
|  | NMD3      | NCALD   |  |
|  | NME1      | NCAM1   |  |



|  |           |               |  |
|--|-----------|---------------|--|
|  | NME1-NME2 | NCAPG2        |  |
|  | NME4      | NCBP1         |  |
|  | NMRAL1    | NCDN          |  |
|  | NMT1      | NCKAP1        |  |
|  | NNAT      | NCKAP1L       |  |
|  | NOB1      | NCKAP5L       |  |
|  | NOC4L     | NCL           |  |
|  | NOL10     | NCLN          |  |
|  | NOL11     | NCOA1         |  |
|  | NOL6      | NCOA2         |  |
|  | NOL7      | NCOA3         |  |
|  | NOL9      | NCOA5         |  |
|  | NOLC1     | NCOA6         |  |
|  | NOM1      | NCOR1         |  |
|  | NOMO1     | NCOR2         |  |
|  | NOMO2     | NCS1          |  |
|  | NOMO3     | NCSTN         |  |
|  | NONO      | NDC1          |  |
|  | NOP10     | NDEL1         |  |
|  | NOP14     | NDFIP1        |  |
|  | NOP16     | NDFIP2        |  |
|  | NOP2      | NDN           |  |
|  | NOP56     | NDP           |  |
|  | NOP58     | NDST1         |  |
|  | NOP9      | NDUFA1        |  |
|  | NOSIP     | NDUFA2        |  |
|  | NOTCH1    | NDUFAB1       |  |
|  | NOTCH2    | NDUFAF4       |  |
|  | NOTCH3    | NDUFB11       |  |
|  | NPC2      | NDUFC2        |  |
|  | NPDC1     | NDUFC2-KCTD14 |  |
|  | NPEPL1    | NDUFS7        |  |
|  | NPEPPS    | NEDD4L        |  |
|  | NPLOC4    | NEDD8         |  |
|  | NPM1      | NEGR1         |  |
|  | NPNT      | NEK7          |  |
|  | NR1H2     | NELL2         |  |
|  | NR2E1     | NEURL1B       |  |
|  | NR2F1     | NEURL4        |  |
|  | NR2F2     | NEUROD1       |  |
|  | NR2F6     | NEUROD2       |  |
|  | NR6A1     | NEUROD6       |  |
|  | NRARP     | NEUROG2       |  |
|  | NRAS      | NF1           |  |
|  | NRBP1     | NF2           |  |
|  | NRD1      | NFASC         |  |
|  | NREP      | NFAT5         |  |
|  | NRM       | NFATC2        |  |
|  | NSA2      | NFATC3        |  |
|  | NSD1      | NFATC4        |  |
|  | NSDHL     | NFE2          |  |

|  |          |          |  |
|--|----------|----------|--|
|  | NSFL1C   | NFE2L1   |  |
|  | NSL1     | NFIA     |  |
|  | NSMCE4A  | NFIB     |  |
|  | NSUN2    | NFIL3    |  |
|  | NSUN5    | NFIX     |  |
|  | NT5C     | NFKB1    |  |
|  | NT5C3B   | NFKB2    |  |
|  | NT5DC2   | NFKBIA   |  |
|  | NTAN1    | NFKBIE   |  |
|  | NTN1     | NFKBIZ   |  |
|  | NUAK1    | NGEF     |  |
|  | NUAK2    | NGF      |  |
|  | NUBP1    | NGFRAP1  |  |
|  | NUBP2    | NHLH2    |  |
|  | NUCB1    | NHP2L1   |  |
|  | NUCKS1   | NHS      |  |
|  | NUDC     | NIPA2    |  |
|  | NUDCD2   | NIPBL    |  |
|  | NUDCD3   | NISCH    |  |
|  | NUDT16L1 | NKAP     |  |
|  | NUDT3    | NKD1     |  |
|  | NUDT4    | NKRF     |  |
|  | NUDT5    | NKTR     |  |
|  | NUDT9    | NKX1-1   |  |
|  | NUF2     | NKX2-3   |  |
|  | NUMA1    | NKX2-5   |  |
|  | NUMB     | NKX3-2   |  |
|  | NUP107   | NLGN1    |  |
|  | NUP133   | NLGN2    |  |
|  | NUP153   | NLGN3    |  |
|  | NUP155   | NLGN4X   |  |
|  | NUP160   | NLK      |  |
|  | NUP188   | NMNAT2   |  |
|  | NUP205   | NMT1     |  |
|  | NUP210   | NNT      |  |
|  | NUP214   | NODAL    |  |
|  | NUP43    | NOG      |  |
|  | NUP50    | NOL4     |  |
|  | NUP62    | NOL6     |  |
|  | NUP85    | NONO     |  |
|  | NUP88    | NOP10    |  |
|  | NUP93    | NOP2     |  |
|  | NUP98    | NOP56    |  |
|  | NUPL1    | NOS1     |  |
|  | NUS1     | NOS1AP   |  |
|  | NUSAP1   | NOTCH1   |  |
|  | NUTF2    | NOTCH2   |  |
|  | NVL      | NOTCH2NL |  |
|  | NXF1     | NOVA1    |  |
|  | NXN      | NOVA2    |  |
|  | NYNRIN   | NPAS1    |  |

|  |          |        |  |
|--|----------|--------|--|
|  | OARD1    | NPAS2  |  |
|  | OAT      | NPAS3  |  |
|  | OAZ1     | NPAS4  |  |
|  | OBSL1    | NPEPPS |  |
|  | OCIAD1   | NPLOC4 |  |
|  | ODC1     | NPM1   |  |
|  | ODF2     | NPTN   |  |
|  | OGDH     | NPTX1  |  |
|  | OGFR     | NPTXR  |  |
|  | OGT      | NR0B1  |  |
|  | OLA1     | NR1D1  |  |
|  | OPA3     | NR1H3  |  |
|  | ORC2     | NR2C1  |  |
|  | ORC3     | NR2C2  |  |
|  | ORC5     | NR2E1  |  |
|  | ORC6     | NR2F1  |  |
|  | ORMDL3   | NR2F2  |  |
|  | OSBP     | NR3C1  |  |
|  | OSBPL11  | NR3C2  |  |
|  | OSTC     | NR4A2  |  |
|  | OTUB1    | NR4A3  |  |
|  | OTUD4    | NR5A1  |  |
|  | OTUD5    | NR6A1  |  |
|  | OTUD6B   | NRBP1  |  |
|  | OTX1     | NRF1   |  |
|  | OTX2     | NRG1   |  |
|  | OVCA2    | NRG2   |  |
|  | OXA1L    | NRIP1  |  |
|  | OXCT1    | NRK    |  |
|  | OXR1     | NRN1   |  |
|  | P4HA1    | NRP1   |  |
|  | P4HB     | NRXN1  |  |
|  | PA2G4    | NRXN2  |  |
|  | PABPN1   | NRXN3  |  |
|  | PACS1    | NSD1   |  |
|  | PACS2    | NSDHL  |  |
|  | PACSIN2  | NSG2   |  |
|  | PAF1     | NTF3   |  |
|  | PAFAH1B1 | NTN1   |  |
|  | PAFAH1B2 | NTN4   |  |
|  | PAFAH1B3 | NTNG1  |  |
|  | PAGR1    | NTNG2  |  |
|  | PAICS    | NTRK2  |  |
|  | PAIP1    | NTRK3  |  |
|  | PAIP2    | NUCKS1 |  |
|  | PAIP2B   | NUDC   |  |
|  | PAK1     | NUDT21 |  |
|  | PAK2     | NUDT4  |  |
|  | PAK4     | NUFIP2 |  |
|  | PALD1    | NUMA1  |  |
|  | PALM     | NUMBL  |  |

|  |             |         |  |
|--|-------------|---------|--|
|  | PALM2-AKAP2 | NUP153  |  |
|  | PAN2        | NUP155  |  |
|  | PANK2       | NUP188  |  |
|  | PANK4       | NUP205  |  |
|  | PANX1       | NUP62   |  |
|  | PAPD4       | NUP85   |  |
|  | PAPD5       | NUP98   |  |
|  | PAPD7       | NUPL1   |  |
|  | PAPOLA      | NUS1    |  |
|  | PAPSS1      | NUTF2   |  |
|  | PARD6G      | NXF1    |  |
|  | PARK7       | NXF2B   |  |
|  | PARL        | NXN     |  |
|  | PARM1       | NXNL2   |  |
|  | PARP1       | NXPH2   |  |
|  | PARP2       | NXT1    |  |
|  | PARVA       | NXT2    |  |
|  | PATL1       | NYAP1   |  |
|  | PATZ1       | OCRL    |  |
|  | PAX6        | ODF1    |  |
|  | PAXBP1      | OFD1    |  |
|  | PAXIP1      | OGDH    |  |
|  | PBK         | OGT     |  |
|  | PBRM1       | OLFM1   |  |
|  | PBX1        | OLIG1   |  |
|  | PBX2        | OLIG3   |  |
|  | PCBP1       | OMG     |  |
|  | PCBP2       | ONECUT1 |  |
|  | PCBP4       | ONECUT2 |  |
|  | PCDH18      | OPA1    |  |
|  | PCDHAC2     | OPA3    |  |
|  | PCDHGC5     | OPHN1   |  |
|  | PCGF2       | OPN1LW  |  |
|  | PCGF3       | OPN5    |  |
|  | PCID2       | OR10C1  |  |
|  | PCIF1       | OR12D2  |  |
|  | PCM1        | OR2H1   |  |
|  | PCNP        | OR6C1   |  |
|  | PCNT        | ORC2    |  |
|  | PCNXL3      | ORMDL3  |  |
|  | PCYOX1      | OSBP    |  |
|  | PCYT1A      | OSBPL11 |  |
|  | PCYT2       | OSBPL6  |  |
|  | PDAP1       | OSBPL9  |  |
|  | PDCD11      | OSGIN2  |  |
|  | PDCD4       | OSM     |  |
|  | PDCD6IP     | OSR1    |  |
|  | PDCL        | OTC     |  |
|  | PDE7A       | OTP     |  |
|  | PDF         | OTUB1   |  |
|  | PDGFA       | OTUD1   |  |

|  |         |          |  |
|--|---------|----------|--|
|  | PDGFRB  | OTUD4    |  |
|  | PDHA1   | OTUD5    |  |
|  | PDIA3   | OTUD7A   |  |
|  | PDIA4   | OTX1     |  |
|  | PDIA6   | OTX2     |  |
|  | PDK1    | OVOL1    |  |
|  | PDK3    | OVOL2    |  |
|  | PDPR    | OXR1     |  |
|  | PDS5A   | OXR1     |  |
|  | PDS5B   | OXT      |  |
|  | PDXDC1  | P2RY1    |  |
|  | PDXP    | P4HA1    |  |
|  | PDZD11  | P4HB     |  |
|  | PDZRN3  | PA2G4    |  |
|  | PEA15   | PABPC1   |  |
|  | PEF1    | PABPC4   |  |
|  | PEG10   | PABPC5   |  |
|  | PEG3    | PACS1    |  |
|  | PELP1   | PACS2    |  |
|  | PES1    | PACSIN1  |  |
|  | PEX19   | PAFAH1B1 |  |
|  | PEX5    | PAFAH1B2 |  |
|  | PEX6    | PAGE1    |  |
|  | PFAS    | PAGE4    |  |
|  | PFDN2   | PAGR1    |  |
|  | PFDN5   | PAGR1    |  |
|  | PFDN6   | PAIP1    |  |
|  | PFKFB3  | PAIP2    |  |
|  | PFKL    | PAK2     |  |
|  | PFKM    | PAK3     |  |
|  | PFN1    | PAK7     |  |
|  | PFN2    | PALM     |  |
|  | PGAM4   | PAN2     |  |
|  | PGAM5   | PAN3     |  |
|  | PGD     | PANK4    |  |
|  | PGK1    | PAPD5    |  |
|  | PGLS    | PAPD7    |  |
|  | PGRMC1  | PAPOLA   |  |
|  | PGRMC2  | PAPOLG   |  |
|  | PGS1    | PARD3    |  |
|  | PHACTR4 | PARD6B   |  |
|  | PHAX    | PARK7    |  |
|  | PHB     | PARP6    |  |
|  | PHB2    | PASD1    |  |
|  | PHC1    | PATL1    |  |
|  | PHC2    | PATZ1    |  |
|  | PHF10   | PAX1     |  |
|  | PHF12   | PAX2     |  |
|  | PHF2    | PAX5     |  |
|  | PHF21B  | PAX6     |  |
|  | PHF23   | PAX8     |  |

|  |         |         |  |
|--|---------|---------|--|
|  | PHF5A   | PAXBP1  |  |
|  | PHF6    | PAXIP1  |  |
|  | PHGDH   | PBDC1   |  |
|  | PHIP    | PBRM1   |  |
|  | PHLDA1  | PBX1    |  |
|  | PHLDB1  | PBX2    |  |
|  | PHLDB2  | PCBP1   |  |
|  | PHPT1   | PCBP2   |  |
|  | PHRF1   | PCBP3   |  |
|  | PHTF1   | PCDH1   |  |
|  | PHYKPL  | PCDH10  |  |
|  | PI4K2A  | PCDH17  |  |
|  | PI4KA   | PCDH19  |  |
|  | PIAS2   | PCDH20  |  |
|  | PIAS4   | PCDH9   |  |
|  | PICALM  | PCDHAC2 |  |
|  | PIEZO1  | PCDHGC4 |  |
|  | PIGF    | PCF11   |  |
|  | PIGQ    | PCGF1   |  |
|  | PIGS    | PCGF2   |  |
|  | PIGT    | PCGF3   |  |
|  | PIGX    | PCGF5   |  |
|  | PIK3R2  | PCIF1   |  |
|  | PIK3R3  | PCLO    |  |
|  | PIM1    | PCMT1   |  |
|  | PIN1    | PCNA    |  |
|  | PINK1   | PCNP    |  |
|  | PIP4K2B | PCNX    |  |
|  | PIP5K1A | PCNXL3  |  |
|  | PIP5K1C | PCSK1N  |  |
|  | PITHD1  | PCSK2   |  |
|  | PITPNA  | PCYT1B  |  |
|  | PITPNB  | PDCD10  |  |
|  | PITRM1  | PDCD6IP |  |
|  | PJA1    | PDE10A  |  |
|  | PJA2    | PDE2A   |  |
|  | PKDCC   | PDE4A   |  |
|  | PKIA    | PDE4D   |  |
|  | PKM     | PDE7B   |  |
|  | PKN2    | PDE8B   |  |
|  | PKNOX2  | PDGFA   |  |
|  | PKP4    | PDGFB   |  |
|  | PLAA    | PDGFC   |  |
|  | PLAGL1  | PDGFRA  |  |
|  | PLAGL2  | PDGFRB  |  |
|  | PLBD2   | PDHA1   |  |
|  | PLCB3   | PDIA3   |  |
|  | PLCG1   | PDLIM4  |  |
|  | PLEC    | PDLIM7  |  |
|  | PLEKHA5 | PDPK1   |  |
|  | PLEKHA8 | PDS5A   |  |

|  |         |          |  |
|--|---------|----------|--|
|  | PLEKHG2 | PDS5B    |  |
|  | PLEKHJ1 | PDXK     |  |
|  | PLEKHO1 | PDZD2    |  |
|  | PLIN3   | PDZD4    |  |
|  | PLK1    | PDZD8    |  |
|  | PLK4    | PDZRN3   |  |
|  | PLOD2   | PEA15    |  |
|  | PLOD3   | PEG10    |  |
|  | PLRG1   | PELI2    |  |
|  | PLS3    | PELP1    |  |
|  | PLXNA1  | PER2     |  |
|  | PLXNA3  | PES1     |  |
|  | PLXNB1  | PEX26    |  |
|  | PLXNB2  | PFDN1    |  |
|  | PLXND1  | PFDN6    |  |
|  | PMF1    | PFN1     |  |
|  | PMM2    | PFN3     |  |
|  | PMPCA   | PGAP2    |  |
|  | PMPCB   | PGD      |  |
|  | PNISR   | PGK1     |  |
|  | PNKD    | PGRMC1   |  |
|  | PNN     | PGRMC2   |  |
|  | PNO1    | PHACTR1  |  |
|  | PNP     | PHACTR3  |  |
|  | PNPT1   | PHB      |  |
|  | PNRC1   | PHC1     |  |
|  | PNRC2   | PHC2     |  |
|  | POC1B   | PHC3     |  |
|  | PODXL   | PHEX     |  |
|  | POFUT2  | PHF1     |  |
|  | POGK    | PHF12    |  |
|  | POGLUT1 | PHF13    |  |
|  | POGZ    | PHF19    |  |
|  | POLA2   | PHF2     |  |
|  | POLD1   | PHF20    |  |
|  | POLD2   | PHF20L1  |  |
|  | POLD3   | PHF21A   |  |
|  | POLDIP2 | PHF21B   |  |
|  | POLDIP3 | PHF23    |  |
|  | POLE    | PHF3     |  |
|  | POLE3   | PHF5A    |  |
|  | POLG    | PHF6     |  |
|  | POLR1A  | PHF8     |  |
|  | POLR1B  | PHIP     |  |
|  | POLR1C  | PHLDA1   |  |
|  | POLR2A  | PHLPP1   |  |
|  | POLR2D  | PHOSPHO1 |  |
|  | POLR2E  | PHOX2B   |  |
|  | POLR2F  | PHYHIP   |  |
|  | POLR2G  | PHYHIPL  |  |
|  | POLR2I  | PI4K2A   |  |

|  |             |         |  |
|--|-------------|---------|--|
|  | POLR2J      | PI4KB   |  |
|  | POLR2M      | PIAS1   |  |
|  | POLR3C      | PIAS2   |  |
|  | POLR3D      | PIAS3   |  |
|  | POLR3E      | PIAS4   |  |
|  | POLR3K      | PICALM  |  |
|  | POLRMT      | PIGA    |  |
|  | POM121      | PIGR    |  |
|  | POM121C     | PIH1D3  |  |
|  | POMGNT1     | PIK3AP1 |  |
|  | POP4        | PIK3C2B |  |
|  | POR         | PIK3CA  |  |
|  | POU3F4      | PIK3CB  |  |
|  | PPA1        | PIK3CD  |  |
|  | PPAN        | PIK3R1  |  |
|  | PPAN-P2RY11 | PIM1    |  |
|  | PPAP2B      | PIM2    |  |
|  | PPAT        | PIM3    |  |
|  | PPDPF       | PIN1    |  |
|  | PPFIA1      | PIN4    |  |
|  | PPHLN1      | PINLYP  |  |
|  | PPIA        | PIP4K2B |  |
|  | PPIB        | PIP5K1C |  |
|  | PPIC        | PIRT    |  |
|  | PPID        | PITPNA  |  |
|  | PPIE        | PITPNB  |  |
|  | PPIF        | PITPNC1 |  |
|  | PPIG        | PITPNM2 |  |
|  | PPIL1       | PITPNM3 |  |
|  | PPIL2       | PITX1   |  |
|  | PIIP5K2     | PITX2   |  |
|  | PPM1A       | PITX3   |  |
|  | PPM1F       | PJA1    |  |
|  | PPM1G       | PKD1    |  |
|  | PPM1L       | PKIG    |  |
|  | PPME1       | PKM     |  |
|  | PPP1CA      | PKN2    |  |
|  | PPP1CB      | PKNOX1  |  |
|  | PPP1CC      | PKNOX2  |  |
|  | PPP1R10     | PLAG1   |  |
|  | PPP1R12A    | PLAGL1  |  |
|  | PPP1R12C    | PLAGL2  |  |
|  | PPP1R14B    | PLCB1   |  |
|  | PPP1R15B    | PLCB3   |  |
|  | PPP1R16A    | PLCG2   |  |
|  | PPP1R2      | PLCL2   |  |
|  | PPP1R7      | PLEKHA2 |  |
|  | PPP1R8      | PLEKHA5 |  |
|  | PPP1R9B     | PLEKHF2 |  |
|  | PPP2CA      | PLK1    |  |
|  | PPP2CB      | PLK2    |  |



|  |          |          |  |
|--|----------|----------|--|
|  | PPP2R1A  | PLP1     |  |
|  | PPP2R1B  | PLRG1    |  |
|  | PPP2R2A  | PLS3     |  |
|  | PPP2R2D  | PLXNA1   |  |
|  | PPP2R4   | PLXNA4   |  |
|  | PPP2R5A  | PLXNB2   |  |
|  | PPP2R5C  | PLXNC1   |  |
|  | PPP2R5D  | PLXND1   |  |
|  | PPP2R5E  | PMEPA1   |  |
|  | PPP3CA   | PMP22    |  |
|  | PPP3CB   | PNISR    |  |
|  | PPP4C    | PNRC1    |  |
|  | PPP4R1   | PODXL2   |  |
|  | PPP4R2   | POFUT1   |  |
|  | PPP5C    | POGK     |  |
|  | PPP6C    | POGZ     |  |
|  | PPP6R1   | POLA1    |  |
|  | PPP6R3   | POLD3    |  |
|  | PPRC1    | POLR1A   |  |
|  | PPT1     | POLR1B   |  |
|  | PPT2     | POLR2A   |  |
|  | PPWD1    | POLR2B   |  |
|  | PQBP1    | POLR2H   |  |
|  | PRC1     | POMP     |  |
|  | PRCC     | PORCN    |  |
|  | PRDM4    | POT1     |  |
|  | PRDX1    | POU2AF1  |  |
|  | PRDX2    | POU2F1   |  |
|  | PRDX3    | POU2F2   |  |
|  | PRDX4    | POU3F1   |  |
|  | PRDX5    | POU3F2   |  |
|  | PRDX6    | POU3F3   |  |
|  | PREB     | POU3F4   |  |
|  | PRELID1  | POU4F1   |  |
|  | PREP     | POU4F3   |  |
|  | PRICKLE4 | POU5F1   |  |
|  | PRIM1    | POU6F1   |  |
|  | PRKAB1   | PPAP2B   |  |
|  | PRKACA   | PPARD    |  |
|  | PRKACB   | PPARGC1A |  |
|  | PRKAG1   | PPARGC1B |  |
|  | PRKAR1A  | PPAT     |  |
|  | PRKAR2A  | PPEF1    |  |
|  | PRKAR2B  | PPFIA1   |  |
|  | PRKCI    | PPFIA2   |  |
|  | PRKCSH   | PPFIA3   |  |
|  | PRKD3    | PPIA     |  |
|  | PRKRA    | PPIE     |  |
|  | PRKRIR   | PPIG     |  |
|  | PRMT1    | PPIL3    |  |
|  | PRMT5    | PPM1A    |  |

|  |         |          |  |
|--|---------|----------|--|
|  | PRMT7   | PPM1E    |  |
|  | PROM1   | PPM1G    |  |
|  | PROSER1 | PPM1H    |  |
|  | PRPF18  | PPME1    |  |
|  | PRPF19  | PPP1CA   |  |
|  | PRPF3   | PPP1CB   |  |
|  | PRPF31  | PPP1CC   |  |
|  | PRPF38B | PPP1R10  |  |
|  | PRPF39  | PPP1R12A |  |
|  | PRPF4   | PPP1R13B |  |
|  | PRPF40A | PPP1R16B |  |
|  | PRPF4B  | PPP1R37  |  |
|  | PRPF6   | PPP1R7   |  |
|  | PRPF8   | PPP1R8   |  |
|  | PRPS1   | PPP1R9B  |  |
|  | PRPS2   | PPP2CA   |  |
|  | PRPSAP1 | PPP2R1A  |  |
|  | PRR11   | PPP2R2A  |  |
|  | PRR12   | PPP2R2B  |  |
|  | PRR14   | PPP2R2C  |  |
|  | PRRC2A  | PPP2R2D  |  |
|  | PRRC2B  | PPP2R3A  |  |
|  | PRRC2C  | PPP2R4   |  |
|  | PRRX2   | PPP2R5A  |  |
|  | PRTG    | PPP2R5B  |  |
|  | PRUNE   | PPP2R5C  |  |
|  | PSAP    | PPP2R5D  |  |
|  | PSAT1   | PPP2R5E  |  |
|  | PSEN1   | PPP3CA   |  |
|  | PSIP1   | PPP3CB   |  |
|  | PSKH1   | PPP4R1   |  |
|  | PSMA1   | PPP4R2   |  |
|  | PSMA3   | PPP5C    |  |
|  | PSMA4   | PPP6C    |  |
|  | PSMA6   | PPP6R1   |  |
|  | PSMA7   | PPP6R3   |  |
|  | PSMB1   | PPRC1    |  |
|  | PSMB2   | PPTC7    |  |
|  | PSMB3   | PQBP1    |  |
|  | PSMB4   | PRAF2    |  |
|  | PSMB5   | PRCC     |  |
|  | PSMB6   | PRDM1    |  |
|  | PSMB7   | PRDM11   |  |
|  | PSMC1   | PRDM12   |  |
|  | PSMC2   | PRDM13   |  |
|  | PSMC3   | PRDM16   |  |
|  | PSMC4   | PRDM2    |  |
|  | PSMC5   | PRDM6    |  |
|  | PSMC6   | PRDM8    |  |
|  | PSMD1   | PREX1    |  |
|  | PSMD11  | PRICKLE1 |  |

|  |         |          |  |
|--|---------|----------|--|
|  | PSMD12  | PRICKLE2 |  |
|  | PSMD13  | PRICKLE3 |  |
|  | PSMD14  | PRIMA1   |  |
|  | PSMD2   | PRKAB2   |  |
|  | PSMD3   | PRKACA   |  |
|  | PSMD4   | PRKAG2   |  |
|  | PSMD5   | PRKAR1A  |  |
|  | PSMD6   | PRKAR2B  |  |
|  | PSMD7   | PRKCB    |  |
|  | PSMD8   | PRKCD    |  |
|  | PSME1   | PRKCE    |  |
|  | PSME3   | PRKCG    |  |
|  | PSME4   | PRK CZ   |  |
|  | PSMG1   | PRKD2    |  |
|  | PSPC1   | PRKDC    |  |
|  | PSRC1   | PRKG1    |  |
|  | PTBP1   | PRKG2    |  |
|  | PTBP2   | PRKRIR   |  |
|  | PTBP3   | PRLR     |  |
|  | PTCD3   | PRMT1    |  |
|  | PTCH1   | PRMT5    |  |
|  | PTDSS2  | PRMT8    |  |
|  | PTGES3  | PROSER1  |  |
|  | PTGFRN  | PROX1    |  |
|  | PTK2    | PRPF19   |  |
|  | PTK7    | PRPF3    |  |
|  | PTMA    | PRPF31   |  |
|  | PTMS    | PRPF38A  |  |
|  | PTN     | PRPF38B  |  |
|  | PTOV1   | PRPF39   |  |
|  | PTP4A1  | PRPF4    |  |
|  | PTP4A2  | PRPF40B  |  |
|  | PTPLAD1 | PRPF4B   |  |
|  | PTPN1   | PRPF8    |  |
|  | PTPN11  | PRPS1    |  |
|  | PTPN12  | PRPS2    |  |
|  | PTPN13  | PRR12    |  |
|  | PTPN23  | PRR14L   |  |
|  | PTPN9   | PRR15    |  |
|  | PTPRA   | PRR15L   |  |
|  | PTPRF   | PRR19    |  |
|  | PTPRS   | PRR7     |  |
|  | PTRHD1  | PRRC2A   |  |
|  | PTTG1IP | PRRC2B   |  |
|  | PUF60   | PRRC2C   |  |
|  | PUM1    | PRRT2    |  |
|  | PUM2    | PSAP     |  |
|  | PVRL1   | PSD      |  |
|  | PVRL2   | PSEN1    |  |
|  | PVRL3   | PSENEEN  |  |
|  | PWP1    | PSIP1    |  |

|  |             |        |  |
|--|-------------|--------|--|
|  | PWP2        | PSMA1  |  |
|  | PXDN        | PSMA2  |  |
|  | PYCR2       | PSMA3  |  |
|  | PYCRL       | PSMA4  |  |
|  | PYGB        | PSMA5  |  |
|  | PYGO2       | PSMA6  |  |
|  | QARS        | PSMA7  |  |
|  | QDPR        | PSMB1  |  |
|  | QKI         | PSMB2  |  |
|  | QRICH1      | PSMB3  |  |
|  | QSER1       | PSMB5  |  |
|  | QTRT1       | PSMB7  |  |
|  | R3HCC1      | PSMC1  |  |
|  | R3HDM1      | PSMC2  |  |
|  | R3HDM2      | PSMC3  |  |
|  | R3HDM4      | PSMC5  |  |
|  | RAB10       | PSMC6  |  |
|  | RAB11A      | PSMD1  |  |
|  | RAB11B      | PSMD10 |  |
|  | RAB11FIP3   | PSMD11 |  |
|  | RAB11FIP4   | PSMD12 |  |
|  | RAB14       | PSMD13 |  |
|  | RAB18       | PSMD14 |  |
|  | RAB1A       | PSMD2  |  |
|  | RAB1B       | PSMD3  |  |
|  | RAB21       | PSMD4  |  |
|  | RAB24       | PSMD6  |  |
|  | RAB28       | PSME3  |  |
|  | RAB2A       | PSME4  |  |
|  | RAB2B       | PSPC1  |  |
|  | RAB31       | PTAR1  |  |
|  | RAB34       | PTBP1  |  |
|  | RAB35       | PTBP2  |  |
|  | RAB4B       | PTBP3  |  |
|  | RAB4B-EGLN2 | PTCH1  |  |
|  | RAB5A       | PTCHD1 |  |
|  | RAB5B       | PTGER4 |  |
|  | RAB5C       | PTGES  |  |
|  | RAB6A       | PTGES3 |  |
|  | RAB6C       | PTGS2  |  |
|  | RAB7A       | PTH1R  |  |
|  | RAB8A       | PTHLH  |  |
|  | RABGGTB     | PTK2   |  |
|  | RABL6       | PTK2B  |  |
|  | RAC1        | PTK7   |  |
|  | RACGAP1     | PTOV1  |  |
|  | RAD18       | PTP4A2 |  |
|  | RAD21       | PTPN1  |  |
|  | RAD23A      | PTPN11 |  |
|  | RAD23B      | PTPN12 |  |
|  | RAD54L2     | PTPN2  |  |

|  |          |           |  |
|--|----------|-----------|--|
|  | RAD9A    | PTPN4     |  |
|  | RAE1     | PTPN6     |  |
|  | RAF1     | PTPRA     |  |
|  | RAI1     | PTPRB     |  |
|  | RAI14    | PTPRC     |  |
|  | RALA     | PTPRCAP   |  |
|  | RALBP1   | PTPRD     |  |
|  | RALGDS   | PTPRF     |  |
|  | RALY     | PTPRK     |  |
|  | RAMP2    | PTPRM     |  |
|  | RAN      | PTPRS     |  |
|  | RANBP1   | PTPRT     |  |
|  | RANBP10  | PTPRZ1    |  |
|  | RANBP2   | PUF60     |  |
|  | RANBP3   | PUM1      |  |
|  | RANBP9   | PUM2      |  |
|  | RANGAP1  | PURA      |  |
|  | RAP1A    | PURB      |  |
|  | RAP1B    | PURG      |  |
|  | RAP1GDS1 | PVRL2     |  |
|  | RAP2C    | PVRL3     |  |
|  | RAPGEF1  | PVRL4     |  |
|  | RARG     | PWWP2A    |  |
|  | RARS     | PWWP2B    |  |
|  | RASA1    | PYGO1     |  |
|  | RAVER1   | PYGO2     |  |
|  | RAVER2   | QKI       |  |
|  | RBBP4    | QRICH1    |  |
|  | RBBP5    | QSER1     |  |
|  | RBBP6    | R3HDM1    |  |
|  | RBBP7    | R3HDM2    |  |
|  | RBBP9    | RAB10     |  |
|  | RBCK1    | RAB11A    |  |
|  | RBFOX2   | RAB11FIP2 |  |
|  | RBM12    | RAB11FIP3 |  |
|  | RBM14    | RAB11FIP4 |  |
|  | RBM15B   | RAB14     |  |
|  | RBM17    | RAB18     |  |
|  | RBM18    | RAB1A     |  |
|  | RBM19    | RAB1B     |  |
|  | RBM22    | RAB2A     |  |
|  | RBM25    | RAB30     |  |
|  | RBM26    | RAB33A    |  |
|  | RBM27    | RAB33B    |  |
|  | RBM28    | RAB35     |  |
|  | RBM3     | RAB39B    |  |
|  | RBM33    | RAB3A     |  |
|  | RBM38    | RAB3GAP2  |  |
|  | RBM39    | RAB43     |  |
|  | RBM45    | RAB4B     |  |
|  | RBM4B    | RAB5A     |  |

|  |         |          |  |
|--|---------|----------|--|
|  | RBM5    | RAB5C    |  |
|  | RBM8A   | RAB6A    |  |
|  | RBMS1   | RAB6B    |  |
|  | RBMS2   | RAB7A    |  |
|  | RBMX    | RAB8A    |  |
|  | RBPJ    | RAB9A    |  |
|  | RBPMS   | RAB9B    |  |
|  | RBX1    | RABEP1   |  |
|  | RCBTB1  | RABGAP1  |  |
|  | RCBTB2  | RABL6    |  |
|  | RCC1    | RAC1     |  |
|  | RCC2    | RAC2     |  |
|  | RCE1    | RAD21    |  |
|  | RCL1    | RAD23B   |  |
|  | RCN1    | RAD54L2  |  |
|  | RCN2    | RAE1     |  |
|  | RCN3    | RAF1     |  |
|  | RCOR1   | RAI1     |  |
|  | RCOR2   | RAI14    |  |
|  | RDX     | RAI2     |  |
|  | RECQL4  | RALA     |  |
|  | REEP3   | RALGAPA1 |  |
|  | REEP4   | RALGAPB  |  |
|  | REPIN1  | RALGDS   |  |
|  | REPS1   | RALGPS1  |  |
|  | RER1    | RAN      |  |
|  | RERE    | RANBP1   |  |
|  | REV3L   | RANBP10  |  |
|  | REXO1   | RANBP2   |  |
|  | RFC1    | RANBP3   |  |
|  | RFC2    | RANBP9   |  |
|  | RFC3    | RAP1A    |  |
|  | RFC4    | RAP1B    |  |
|  | RFK     | RAP1GAP  |  |
|  | RFWD2   | RAP1GAP2 |  |
|  | RFX4    | RAP1GDS1 |  |
|  | RGL2    | RAP2A    |  |
|  | RGMA    | RAPGEF1  |  |
|  | RGP1    | RAPGEF2  |  |
|  | RGS12   | RAPGEF4  |  |
|  | RGS19   | RAPGEF5  |  |
|  | RHEB    | RAPGEF6  |  |
|  | RHNO1   | RAPH1    |  |
|  | RHOA    | RARA     |  |
|  | RHOB    | RARB     |  |
|  | RHOBTB3 | RARG     |  |
|  | RHOG    | RASA1    |  |
|  | RHOQ    | RASAL2   |  |
|  | RHOT1   | RASD2    |  |
|  | RHOT2   | RASGEF1A |  |
|  | RIOK3   | RASGEF1B |  |

|  |                 |            |  |
|--|-----------------|------------|--|
|  | RLF             | RASGRF1    |  |
|  | RMDN3           | RASGRP1    |  |
|  | RMND5A          | RASIP1     |  |
|  | RNASEH2C        | RASSF8     |  |
|  | RNASEK-C17orf49 | RAVER1     |  |
|  | RND2            | RB1        |  |
|  | RNF10           | RB1CC1     |  |
|  | RNF11           | RBBP4      |  |
|  | RNF114          | RBBP5      |  |
|  | RNF115          | RBBP6      |  |
|  | RNF121          | RBBP7      |  |
|  | RNF123          | RBFOX1     |  |
|  | RNF126          | RBFOX2     |  |
|  | RNF14           | RBFOX3     |  |
|  | RNF144A         | RBL2       |  |
|  | RNF145          | RBM10      |  |
|  | RNF149          | RBM14      |  |
|  | RNF165          | RBM14-RBM4 |  |
|  | RNF167          | RBM15      |  |
|  | RNF181          | RBM15B     |  |
|  | RNF185          | RBM17      |  |
|  | RNF187          | RBM20      |  |
|  | RNF2            | RBM22      |  |
|  | RNF20           | RBM25      |  |
|  | RNF214          | RBM26      |  |
|  | RNF219          | RBM27      |  |
|  | RNF220          | RBM3       |  |
|  | RNF25           | RBM33      |  |
|  | RNF38           | RBM38      |  |
|  | RNF4            | RBM39      |  |
|  | RNF40           | RBM4       |  |
|  | RNF44           | RBM41      |  |
|  | RNF5            | RBM42      |  |
|  | RNF7            | RBM47      |  |
|  | RNF8            | RBM5       |  |
|  | RNH1            | RBM6       |  |
|  | RNPEP           | RBM7       |  |
|  | RNPEPL1         | RBM8A      |  |
|  | RNPS1           | RBMX       |  |
|  | ROBO1           | RBMX2      |  |
|  | ROR2            | RBP4       |  |
|  | RP11-1055B8.7   | RBP7       |  |
|  | RP11-1407O15.2  | RBPJ       |  |
|  | RP11-156P1.2    | RBPMS      |  |
|  | RP11-407N17.3   | RBPMS2     |  |
|  | RP11-468E2.2    | RBX1       |  |
|  | RP11-512M8.5    | RC3H1      |  |
|  | RP4-559A3.7     | RC3H2      |  |
|  | RPA1            | RCAN2      |  |
|  | RPA2            | RCC1       |  |
|  | RPAP1           | RCC2       |  |

|  |         |        |  |
|--|---------|--------|--|
|  | RPF2    | RCOR1  |  |
|  | RPL10A  | RCOR3  |  |
|  | RPL12   | RDH10  |  |
|  | RPL13   | RDX    |  |
|  | RPL13A  | REEP1  |  |
|  | RPL14   | REL    |  |
|  | RPL15   | RELA   |  |
|  | RPL18A  | RELB   |  |
|  | RPL19   | RELL1  |  |
|  | RPL21   | RELN   |  |
|  | RPL22   | REPS1  |  |
|  | RPL22L1 | RERE   |  |
|  | RPL23   | REST   |  |
|  | RPL23A  | RET    |  |
|  | RPL26   | REV1   |  |
|  | RPL27   | REV3L  |  |
|  | RPL27A  | REXO1  |  |
|  | RPL3    | RFC1   |  |
|  | RPL30   | RFWD2  |  |
|  | RPL31   | RFX1   |  |
|  | RPL32   | RFX2   |  |
|  | RPL34   | RFX3   |  |
|  | RPL35   | RFX4   |  |
|  | RPL35A  | RFX7   |  |
|  | RPL36   | RGAG1  |  |
|  | RPL36AL | RGL1   |  |
|  | RPL37   | RGS1   |  |
|  | RPL37A  | RGS10  |  |
|  | RPL38   | RGS19  |  |
|  | RPL39   | RGS7   |  |
|  | RPL4    | RGS7BP |  |
|  | RPL5    | RHBDD2 |  |
|  | RPL6    | RHEB   |  |
|  | RPL7    | RHOA   |  |
|  | RPL7A   | RHOC   |  |
|  | RPL7L1  | RHOQ   |  |
|  | RPL8    | RHOT1  |  |
|  | RPLP0   | RHOV   |  |
|  | RPLP1   | RHOXF1 |  |
|  | RPN1    | RIBC1  |  |
|  | RPN2    | RIC8B  |  |
|  | RPRD1A  | RICTOR |  |
|  | RPRD1B  | RIF1   |  |
|  | RPS10   | RIMBP2 |  |
|  | RPS11   | RIMKLB |  |
|  | RPS12   | RIMS1  |  |
|  | RPS13   | RIMS2  |  |
|  | RPS14   | RING1  |  |
|  | RPS15   | RLF    |  |
|  | RPS18   | RLIM   |  |
|  | RPS19   | RMND5A |  |



|  |                |                |  |
|--|----------------|----------------|--|
|  | RPS2           | RNASEK         |  |
|  | RPS20          | RND1           |  |
|  | RPS21          | RND3           |  |
|  | RPS23          | RNF103         |  |
|  | RPS24          | RNF11          |  |
|  | RPS25          | RNF111         |  |
|  | RPS26          | RNF113A        |  |
|  | RPS27A         | RNF113B        |  |
|  | RPS27L         | RNF126         |  |
|  | RPS28          | RNF138         |  |
|  | RPS29          | RNF139         |  |
|  | RPS3           | RNF144A        |  |
|  | RPS3A          | RNF145         |  |
|  | RPS4X          | RNF146         |  |
|  | RPS5           | RNF165         |  |
|  | RPS6           | RNF17          |  |
|  | RPS6KA1        | RNF170         |  |
|  | RPS6KA2        | RNF19B         |  |
|  | RPS6KA3        | RNF2           |  |
|  | RPS6KA6        | RNF208         |  |
|  | RPS6KB2        | RNF214         |  |
|  | RPS7           | RNF220         |  |
|  | RPS8           | RNF26          |  |
|  | RPS9           | RNF31          |  |
|  | RPSA           | RNF34          |  |
|  | RPTOR          | RNF38          |  |
|  | RQCD1          | RNF4           |  |
|  | RRAGA          | RNF40          |  |
|  | RRAGB          | RNF41          |  |
|  | RRAGC          | RNF43          |  |
|  | RRAGD          | RNF8           |  |
|  | RRBP1          | RNPS1          |  |
|  | RRM1           | ROBO2          |  |
|  | RRM2           | ROCK1          |  |
|  | RRN3           | ROCK2          |  |
|  | RRP1           | ROR1           |  |
|  | RRP12          | RORB           |  |
|  | RRP15          | RORC           |  |
|  | RRP1B          | RP11-101E3.5   |  |
|  | RRP7A          | RP11-1055B8.7  |  |
|  | RRP9           | RP11-105C20.2  |  |
|  | RRS1           | RP11-152F13.10 |  |
|  | RSL1D1         | RP11-159G9.5   |  |
|  | RSPO1          | RP11-295D22.1  |  |
|  | RTCA           | RP11-343C2.11  |  |
|  | RTCB           | RP11-508N12.4  |  |
|  | RTEL1          | RP11-565P22.6  |  |
|  | RTEL1-TNFRSF6B | RP11-58C22.1   |  |
|  | RTF1           | RP11-598P20.5  |  |
|  | RTFDC1         | RP11-599B13.6  |  |
|  | RTKN           | RP11-603J24.9  |  |

|  |         |                |  |
|--|---------|----------------|--|
|  | RTN3    | RP11-762I7.5   |  |
|  | RTN4    | RP11-793H13.10 |  |
|  | RUFY2   | RP2            |  |
|  | RUVBL2  | RPA2           |  |
|  | RWDD1   | RPGR           |  |
|  | RXRA    | RPL10          |  |
|  | RXRB    | RPL10A         |  |
|  | RYK     | RPL11          |  |
|  | S1PR3   | RPL13          |  |
|  | SAC3D1  | RPL13A         |  |
|  | SAE1    | RPL14          |  |
|  | SAFB    | RPL15          |  |
|  | SAFB2   | RPL17          |  |
|  | SALL1   | RPL17-C18orf32 |  |
|  | SALL2   | RPL18          |  |
|  | SALL4   | RPL18A         |  |
|  | SAMD1   | RPL19          |  |
|  | SAMD14  | RPL21          |  |
|  | SAMD4B  | RPL23A         |  |
|  | SAMHD1  | RPL24          |  |
|  | SAMM50  | RPL26          |  |
|  | SAP130  | RPL27          |  |
|  | SAP30   | RPL27A         |  |
|  | SAP30BP | RPL28          |  |
|  | SAR1A   | RPL3           |  |
|  | SAR1B   | RPL30          |  |
|  | SARNP   | RPL31          |  |
|  | SARS    | RPL32          |  |
|  | SARS2   | RPL34          |  |
|  | SART1   | RPL35          |  |
|  | SART3   | RPL35A         |  |
|  | SASH1   | RPL36          |  |
|  | SAV1    | RPL38          |  |
|  | SBF1    | RPL39          |  |
|  | SBF2    | RPL4           |  |
|  | SBK1    | RPL5           |  |
|  | SBNO1   | RPL6           |  |
|  | SCAF1   | RPL7           |  |
|  | SCAF11  | RPL7A          |  |
|  | SCAF4   | RPL8           |  |
|  | SCAF8   | RPL9           |  |
|  | SCAMP2  | RPLP0          |  |
|  | SCAMP3  | RPLP2          |  |
|  | SCAMP4  | RPP25L         |  |
|  | SCAP    | RPRD2          |  |
|  | SCCPDH  | RPS10          |  |
|  | SCD     | RPS10-NUDT3    |  |
|  | SCPEP1  | RPS11          |  |
|  | SCRIB   | RPS12          |  |
|  | SCUBE1  | RPS13          |  |
|  | SCUBE3  | RPS14          |  |

|  |         |         |  |
|--|---------|---------|--|
|  | SCYL1   | RPS15   |  |
|  | SDAD1   | RPS15A  |  |
|  | SDC1    | RPS16   |  |
|  | SDC3    | RPS18   |  |
|  | SDCBP   | RPS19   |  |
|  | SDCCAG3 | RPS2    |  |
|  | SDE2    | RPS23   |  |
|  | SDF4    | RPS24   |  |
|  | SDHA    | RPS25   |  |
|  | SDHB    | RPS26   |  |
|  | SDHC    | RPS27   |  |
|  | SDHD    | RPS27A  |  |
|  | SDR39U1 | RPS28   |  |
|  | SEC13   | RPS3    |  |
|  | SEC14L1 | RPS3A   |  |
|  | SEC16A  | RPS4X   |  |
|  | SEC23A  | RPS4Y1  |  |
|  | SEC23B  | RPS5    |  |
|  | SEC23IP | RPS6    |  |
|  | SEC24B  | RPS6KA3 |  |
|  | SEC24C  | RPS6KA4 |  |
|  | SEC31A  | RPS6KA5 |  |
|  | SEC61A1 | RPS6KA6 |  |
|  | SEC61A2 | RPS6KB1 |  |
|  | SEC61G  | RPS7    |  |
|  | SEC62   | RPS8    |  |
|  | SEC63   | RPS9    |  |
|  | SEH1L   | RPSA    |  |
|  | SEL1L   | RPTOR   |  |
|  | SELO    | RQCD1   |  |
|  | SELT    | RRAGB   |  |
|  | SEMA3F  | RRAGC   |  |
|  | SEMA4C  | RRAGD   |  |
|  | SEMA5B  | RRAS2   |  |
|  | SENP1   | RREB1   |  |
|  | SENP2   | RRM1    |  |
|  | SENP3   | RRM2    |  |
|  | SENP6   | RS1     |  |
|  | 15-Sep  | RSBN1L  |  |
|  | SEPHS1  | RSF1    |  |
|  | SEPHS2  | RSL24D1 |  |
|  | SEPP1   | RSPRY1  |  |
|  | 11-Sep  | RSRC2   |  |
|  | 2-Sep   | RTF1    |  |
|  | 3-Sep   | RTN1    |  |
|  | 7-Sep   | RTN4R   |  |
|  | 8-Sep   | RTN4RL1 |  |
|  | 9-Sep   | RTN4RL2 |  |
|  | SEPW1   | RTP4    |  |
|  | SERBP1  | RUNDC3A |  |
|  | SERF2   | RUNX1   |  |

|  |          |         |  |
|--|----------|---------|--|
|  | SERINC1  | RUNX1T1 |  |
|  | SERINC3  | RUNX2   |  |
|  | SERINC4  | RUNX3   |  |
|  | SERP1    | RUSC1   |  |
|  | SERPINF1 | RUSC2   |  |
|  | SERPINH1 | RUVBL1  |  |
|  | SET      | RUVBL2  |  |
|  | SETD1A   | RWDD1   |  |
|  | SETD1B   | RXRA    |  |
|  | SETD2    | RXRB    |  |
|  | SETD5    | RYK     |  |
|  | SETD7    | RYR2    |  |
|  | SETD8    | RYR3    |  |
|  | SETDB1   | S100PBP |  |
|  | SF1      | S1PR1   |  |
|  | SF3A1    | SACM1L  |  |
|  | SF3A2    | SAE1    |  |
|  | SF3A3    | SAFB    |  |
|  | SF3B1    | SAFB2   |  |
|  | SF3B14   | SALL1   |  |
|  | SF3B2    | SALL4   |  |
|  | SF3B3    | SAMD4A  |  |
|  | SF3B5    | SAMD4B  |  |
|  | SFPQ     | SAP130  |  |
|  | SFR1     | SARNP   |  |
|  | SFRP1    | SARS    |  |
|  | SFRP2    | SART1   |  |
|  | SFSWAP   | SART3   |  |
|  | SFXN1    | SAT1    |  |
|  | SGOL1    | SATB1   |  |
|  | SGOL2    | SATB2   |  |
|  | SGPL1    | SBF1    |  |
|  | SGTA     | SBNO1   |  |
|  | SH2B1    | SCAF1   |  |
|  | SH3BGRL  | SCAF11  |  |
|  | SH3BGRL3 | SCAF4   |  |
|  | SH3BP4   | SCAF8   |  |
|  | SH3GL1   | SCAI    |  |
|  | SH3GLB1  | SCAMP1  |  |
|  | SH3GLB2  | SCAMP5  |  |
|  | SH3PXD2A | SCARF2  |  |
|  | SH3PXD2B | SCD     |  |
|  | SHC1     | SCFD1   |  |
|  | SHCBP1   | SCHIP1  |  |
|  | SHFM1    | SCML1   |  |
|  | SHH      | SCML2   |  |
|  | SHISA2   | SCN1A   |  |
|  | SHKBP1   | SCN2A   |  |
|  | SHMT1    | SCN3A   |  |
|  | SHMT2    | SCN5A   |  |
|  | SHOC2    | SCN8A   |  |

|  |          |          |  |
|--|----------|----------|--|
|  | SHROOM3  | SCRIB    |  |
|  | SIDT2    | SCRT2    |  |
|  | SIGMAR1  | SCUBE1   |  |
|  | SIN3A    | SCUBE3   |  |
|  | SIPA1    | SEC11C   |  |
|  | SIPA1L1  | SEC14L1  |  |
|  | SIRPA    | SEC24B   |  |
|  | SIRPB1   | SEC24C   |  |
|  | SIRPG    | SEC61A1  |  |
|  | SIRT1    | SEC61G   |  |
|  | SIRT2    | SEC62    |  |
|  | SIRT6    | SEL1L    |  |
|  | SIVA1    | SEMA3A   |  |
|  | SIX2     | SEMA3F   |  |
|  | SIX5     | SEMA4C   |  |
|  | SKA2     | SEMA4D   |  |
|  | SKA3     | SEMA6A   |  |
|  | SKI      | SEMA6D   |  |
|  | SKIDA1   | SENP1    |  |
|  | SKIV2L   | SENP2    |  |
|  | SKIV2L2  | SENP3    |  |
|  | SKP1     | SENP5    |  |
|  | SKP2     | SENP6    |  |
|  | SLAIN2   | SEPHS1   |  |
|  | SLBP     | SERBP1   |  |
|  | SLC12A7  | SERINC3  |  |
|  | SLC16A1  | SERP2    |  |
|  | SLC16A3  | SERPINC1 |  |
|  | SLC20A1  | SERPINE2 |  |
|  | SLC20A2  | SERPING1 |  |
|  | SLC22A17 | SERTAD2  |  |
|  | SLC24A5  | SESN3    |  |
|  | SLC25A1  | SESTD1   |  |
|  | SLC25A11 | SET      |  |
|  | SLC25A13 | SETBP1   |  |
|  | SLC25A17 | SETD1A   |  |
|  | SLC25A22 | SETD1B   |  |
|  | SLC25A23 | SETD2    |  |
|  | SLC25A24 | SETD5    |  |
|  | SLC25A27 | SETD8    |  |
|  | SLC25A3  | SETDB1   |  |
|  | SLC25A36 | SETX     |  |
|  | SLC25A37 | SEZ6L    |  |
|  | SLC25A39 | SF1      |  |
|  | SLC25A4  | SF3A1    |  |
|  | SLC25A46 | SF3A2    |  |
|  | SLC25A5  | SF3A3    |  |
|  | SLC25A51 | SF3B1    |  |
|  | SLC25A52 | SF3B14   |  |
|  | SLC27A4  | SF3B2    |  |
|  | SLC2A1   | SF3B3    |  |

|  |          |          |  |
|--|----------|----------|--|
|  | SLC2A14  | SF3B4    |  |
|  | SLC2A3   | SF3B5    |  |
|  | SLC30A5  | SFMBT1   |  |
|  | SLC30A9  | SFMBT2   |  |
|  | SLC31A1  | SFPQ     |  |
|  | SLC35A4  | SFRP1    |  |
|  | SLC35B1  | SFSWAP   |  |
|  | SLC35B2  | SGIP1    |  |
|  | SLC35C2  | SGMS1    |  |
|  | SLC35E1  | SGTA     |  |
|  | SLC38A1  | SH2B1    |  |
|  | SLC38A10 | SH3GLB1  |  |
|  | SLC38A2  | SH3KBP1  |  |
|  | SLC38A4  | SH3PXD2A |  |
|  | SLC39A10 | SHANK1   |  |
|  | SLC39A6  | SHANK3   |  |
|  | SLC3A2   | SHB      |  |
|  | SLC44A2  | SHE      |  |
|  | SLC4A1   | SHFM1    |  |
|  | SLC4A2   | SHH      |  |
|  | SLC6A6   | SHISA6   |  |
|  | SLC6A8   | SHISA7   |  |
|  | SLC7A5   | SHISA9   |  |
|  | SLC7A6   | SHOC2    |  |
|  | SLMO2    | SHOX     |  |
|  | SLTM     | SHROOM4  |  |
|  | SMAD2    | SIAH1    |  |
|  | SMAD3    | SIAH2    |  |
|  | SMAD4    | SIK1     |  |
|  | SMAD5    | SIK2     |  |
|  | SMAP1    | SIK3     |  |
|  | SMARCA1  | SIM1     |  |
|  | SMARCA4  | SIN3A    |  |
|  | SMARCA4  | SIN3B    |  |
|  | SMARCB1  | SIPA1L1  |  |
|  | SMARCC1  | SIPA1L2  |  |
|  | SMARCC2  | SIPA1L3  |  |
|  | SMARCD1  | SIRPA    |  |
|  | SMARCE1  | SIX1     |  |
|  | SMC1A    | SIX2     |  |
|  | SMC2     | SIX3     |  |
|  | SMC3     | SIX4     |  |
|  | SMC4     | SIX6     |  |
|  | SMC5     | SKI      |  |
|  | SMCHD1   | SKIDA1   |  |
|  | SMDT1    | SKIL     |  |
|  | SMEK1    | SKIV2L2  |  |
|  | SMEK2    | SKOR2    |  |
|  | SMG5     | SKP2     |  |
|  | SMG6     | SLAIN1   |  |
|  | SMG7     | SLAIN2   |  |

|  |          |          |  |
|--|----------|----------|--|
|  | SMG8     | SLC10A3  |  |
|  | SMIM15   | SLC12A2  |  |
|  | SMN1     | SLC12A5  |  |
|  | SMN2     | SLC13A4  |  |
|  | SMNDC1   | SLC16A2  |  |
|  | SMO      | SLC17A7  |  |
|  | SMPD4    | SLC1A2   |  |
|  | SMU1     | SLC1A3   |  |
|  | SMURF1   | SLC1A6   |  |
|  | SMURF2   | SLC20A2  |  |
|  | SMYD5    | SLC22A23 |  |
|  | SNAI1    | SLC24A3  |  |
|  | SNAP23   | SLC25A11 |  |
|  | SNAP47   | SLC25A14 |  |
|  | SNAPC2   | SLC25A19 |  |
|  | SNAPC3   | SLC25A28 |  |
|  | SND1     | SLC25A5  |  |
|  | SNN      | SLC29A1  |  |
|  | SNORA34  | SLC2A1   |  |
|  | SNRNP200 | SLC2A13  |  |
|  | SNRNP40  | SLC30A1  |  |
|  | SNRNP70  | SLC30A10 |  |
|  | SNRPA    | SLC30A3  |  |
|  | SNRPA1   | SLC32A1  |  |
|  | SNRPB    | SLC35A1  |  |
|  | SNRPB2   | SLC35A2  |  |
|  | SNRPD1   | SLC35F1  |  |
|  | SNRPD3   | SLC38A1  |  |
|  | SNRPE    | SLC38A2  |  |
|  | SNRPF    | SLC38A4  |  |
|  | SNW1     | SLC38A5  |  |
|  | SNX1     | SLC39A10 |  |
|  | SNX12    | SLC39A8  |  |
|  | SNX17    | SLC39A9  |  |
|  | SNX2     | SLC40A1  |  |
|  | SNX22    | SLC41A1  |  |
|  | SNX27    | SLC41A2  |  |
|  | SNX3     | SLC44A1  |  |
|  | SNX4     | SLC48A1  |  |
|  | SNX5     | SLC4A1   |  |
|  | SNX6     | SLC4A2   |  |
|  | SOD1     | SLC4A4   |  |
|  | SOGA1    | SLC4A7   |  |
|  | SOGA2    | SLC4A8   |  |
|  | SON      | SLC5A3   |  |
|  | SORT1    | SLC5A3   |  |
|  | SOX10    | SLC6A1   |  |
|  | SOX11    | SLC6A14  |  |
|  | SOX12    | SLC6A17  |  |
|  | SOX13    | SLC6A3   |  |
|  | SOX2     | SLC6A6   |  |

|  |          |         |  |
|--|----------|---------|--|
|  | SOX3     | SLC6A8  |  |
|  | SOX4     | SLC7A1  |  |
|  | SOX9     | SLC7A3  |  |
|  | SP1      | SLC8A1  |  |
|  | SP2      | SLC8A2  |  |
|  | SP3      | SLC9A1  |  |
|  | SPAG5    | SLC9A3  |  |
|  | SPAG7    | SLC9A6  |  |
|  | SPAG9    | SLC9A7  |  |
|  | SPARC    | SLIT1   |  |
|  | SPAST    | SLIT2   |  |
|  | SPATA13  | SLIT3   |  |
|  | SPATS2   | SLITRK1 |  |
|  | SPC24    | SLITRK3 |  |
|  | SPC25    | SLITRK4 |  |
|  | SPCS2    | SLITRK5 |  |
|  | SPCS3    | SLMAP   |  |
|  | SPECC1L  | SLTM    |  |
|  | SPEN     | SMAD1   |  |
|  | SPG20    | SMAD2   |  |
|  | SPG21    | SMAD3   |  |
|  | SPG7     | SMAD4   |  |
|  | SPIN1    | SMAD5   |  |
|  | SPIRE1   | SMAD7   |  |
|  | SPNS1    | SMAP1   |  |
|  | SPON1    | SMARCA1 |  |
|  | SPOP     | SMARCA2 |  |
|  | SPPL3    | SMARCA4 |  |
|  | SPRED1   | SMARCA5 |  |
|  | SPRED2   | SMARCA1 |  |
|  | SPRY1    | SMARCB1 |  |
|  | SPSB3    | SMARCC1 |  |
|  | SPSB4    | SMARCC2 |  |
|  | SPTAN1   | SMARCD1 |  |
|  | SPTBN1   | SMARCE1 |  |
|  | SPTLC1   | SMC1A   |  |
|  | SPTSSA   | SMC2    |  |
|  | SQLE     | SMC3    |  |
|  | SQSTM1   | SMCHD1  |  |
|  | SRC      | SMEK1   |  |
|  | SRCAP    | SMEK2   |  |
|  | SREBF1   | SMG1    |  |
|  | SREBF2   | SMG6    |  |
|  | SREK1    | SMG7    |  |
|  | SREK1IP1 | SMIM11  |  |
|  | SRF      | SMIM12  |  |
|  | SRGAP3   | SMIM14  |  |
|  | SRM      | SMIM20  |  |
|  | SRP14    | SMNDC1  |  |
|  | SRP19    | SMPD3   |  |
|  | SRP54    | SMPX    |  |



|  |         |          |  |
|--|---------|----------|--|
|  | SRP68   | SMS      |  |
|  | SRP72   | SMU1     |  |
|  | SRP9    | SMURF1   |  |
|  | SRPK1   | SMURF2   |  |
|  | SRPRB   | SNAI2    |  |
|  | SRRD    | SNAP23   |  |
|  | SRRM1   | SNAP25   |  |
|  | SRRM2   | SNAP91   |  |
|  | SRRT    | SNCA     |  |
|  | SRSF1   | SND1     |  |
|  | SRSF11  | SNED1    |  |
|  | SRSF2   | SNPH     |  |
|  | SRSF3   | SNRK     |  |
|  | SRSF4   | SNRNP200 |  |
|  | SRSF5   | SNRNP40  |  |
|  | SRSF6   | SNRNP70  |  |
|  | SRSF7   | SNRPA1   |  |
|  | SRSF9   | SNRPB    |  |
|  | SS18    | SNRPC    |  |
|  | SSB     | SNRPD1   |  |
|  | SSBP3   | SNRPD2   |  |
|  | SSR1    | SNRPD3   |  |
|  | SSR2    | SNRPE    |  |
|  | SSR3    | SNRPF    |  |
|  | SSR4    | SNRPG    |  |
|  | SSRP1   | SNW1     |  |
|  | SSSCA1  | SNX1     |  |
|  | SSX2IP  | SNX12    |  |
|  | ST13    | SNX18    |  |
|  | STAG1   | SNX2     |  |
|  | STAG2   | SNX27    |  |
|  | STARD3  | SNX30    |  |
|  | STARD7  | SNX9     |  |
|  | STAU1   | SOBP     |  |
|  | STIL    | SOCS1    |  |
|  | STIP1   | SOCS2    |  |
|  | STK11   | SOCS3    |  |
|  | STK111P | SOCS5    |  |
|  | STK16   | SOCS6    |  |
|  | STK24   | SOCS7    |  |
|  | STK25   | SOGA1    |  |
|  | STK35   | SOGA3    |  |
|  | STK38   | SON      |  |
|  | STK4    | SORCS1   |  |
|  | STK40   | SORT1    |  |
|  | STOML2  | SOS1     |  |
|  | STOX2   | SOS2     |  |
|  | STRA6   | SOST     |  |
|  | STRAP   | SOWAHA   |  |
|  | STRIP1  | SOWAHD   |  |
|  | STRN3   | SOX1     |  |

|  |          |         |  |
|--|----------|---------|--|
|  | STRN4    | SOX10   |  |
|  | STT3A    | SOX11   |  |
|  | STT3B    | SOX12   |  |
|  | STUB1    | SOX13   |  |
|  | STX12    | SOX14   |  |
|  | STX16    | SOX17   |  |
|  | STX5     | SOX2    |  |
|  | SUB1     | SOX21   |  |
|  | SUCLA2   | SOX30   |  |
|  | SUCLG2   | SOX4    |  |
|  | SUDS3    | SOX5    |  |
|  | SUFU     | SOX6    |  |
|  | SUGT1    | SOX8    |  |
|  | SULF1    | SOX9    |  |
|  | SULF2    | SP1     |  |
|  | SUMO1    | SP2     |  |
|  | SUMO2    | SP3     |  |
|  | SUMO3    | SP4     |  |
|  | SUN1     | SP5     |  |
|  | SUPT16H  | SP7     |  |
|  | SUPT20H  | SP8     |  |
|  | SUPT5H   | SP9     |  |
|  | SUPT6H   | SPAG9   |  |
|  | SUPV3L1  | SPARC   |  |
|  | SURF2    | SPAST   |  |
|  | SURF4    | SPATA2  |  |
|  | SUV39H1  | SPATS2  |  |
|  | SUV39H2  | SPATS2L |  |
|  | SUV420H2 | SPCS2   |  |
|  | SUZ12    | SPCS3   |  |
|  | SWI5     | SPDEF   |  |
|  | SYDE1    | SPDYA   |  |
|  | SYMPK    | SPECC1L |  |
|  | SYNCRIP  | SPEG    |  |
|  | SYNGAP1  | SPEN    |  |
|  | SYT11    | SPHKAP  |  |
|  | SYVN1    | SPI1    |  |
|  | SZRD1    | SPIB    |  |
|  | TAB2     | SPIN1   |  |
|  | TACC3    | SPIN3   |  |
|  | TADA1    | SPIN4   |  |
|  | TADA2A   | SPOCK1  |  |
|  | TADA3    | SPOP    |  |
|  | TAF15    | SPPL3   |  |
|  | TAF2     | SPRED1  |  |
|  | TAF5L    | SPRTN   |  |
|  | TAF6     | SPRY2   |  |
|  | TAF9     | SPSB1   |  |
|  | TAGLN2   | SPTAN1  |  |
|  | TAGLN3   | SPTB    |  |
|  | TALDO1   | SPTBN1  |  |

|  |          |         |  |
|--|----------|---------|--|
|  | TAOK2    | SPTBN4  |  |
|  | TARBP2   | SPTLC2  |  |
|  | TARDBP   | SPTSSA  |  |
|  | TARS     | SPTY2D1 |  |
|  | TAX1BP1  | SQLE    |  |
|  | TBC1D1   | SRC     |  |
|  | TBC1D10B | SRCAP   |  |
|  | TBC1D13  | SRCIN1  |  |
|  | TBC1D16  | SREK1   |  |
|  | TBC1D20  | SRF     |  |
|  | TBC1D9B  | SRGAP1  |  |
|  | TBCA     | SRGAP2  |  |
|  | TBCB     | SRGAP3  |  |
|  | TBCD     | SRGN    |  |
|  | TBL1Y    | SRP14   |  |
|  | TBL2     | SRP54   |  |
|  | TBL3     | SRPK2   |  |
|  | TBP      | SRPR    |  |
|  | TBRG1    | SRRM1   |  |
|  | TBRG4    | SRRM2   |  |
|  | TCEA1    | SRRT    |  |
|  | TCEAL8   | SRSF1   |  |
|  | TCEB1    | SRSF11  |  |
|  | TCEB2    | SRSF3   |  |
|  | TCEB3    | SRSF4   |  |
|  | TCERG1   | SRSF5   |  |
|  | TCF12    | SRSF6   |  |
|  | TCF20    | SRSF7   |  |
|  | TCF25    | SRSF9   |  |
|  | TCF3     | SS18    |  |
|  | TCF4     | SS18L1  |  |
|  | TCF7L1   | SSBP2   |  |
|  | TCOF1    | SSBP3   |  |
|  | TCP1     | SSH2    |  |
|  | TDP2     | SSR3    |  |
|  | TEAD1    | SSR4    |  |
|  | TEAD2    | SSRP1   |  |
|  | TECR     | SSTR1   |  |
|  | TEDDM1   | SSU72   |  |
|  | TENM3    | SSX4    |  |
|  | TENM4    | ST13    |  |
|  | TES      | ST14    |  |
|  | TESK1    | ST18    |  |
|  | TET3     | ST3GAL1 |  |
|  | TEX10    | ST3GAL2 |  |
|  | TEX261   | ST5     |  |
|  | TF       | ST7     |  |
|  | TFDP1    | ST8SIA3 |  |
|  | TFDP2    | STAG1   |  |
|  | TFDP3    | STAG2   |  |
|  | TFG      | STAM    |  |

|  |                |          |  |
|--|----------------|----------|--|
|  | TFIP11         | STAT1    |  |
|  | TFRC           | STAT2    |  |
|  | TGFBR1         | STAT3    |  |
|  | TGIF1          | STAT4    |  |
|  | TGIF2-C20orf24 | STAT5A   |  |
|  | TGS1           | STAT5B   |  |
|  | THAP11         | STAT6    |  |
|  | THBS1          | STAU1    |  |
|  | THBS3          | STAU2    |  |
|  | THOC1          | STIM1    |  |
|  | THOC2          | STIM2    |  |
|  | THOC3          | STIP1    |  |
|  | THOC5          | STK11    |  |
|  | THOC6          | STK38L   |  |
|  | THOC7          | STK39    |  |
|  | THOP1          | STK40    |  |
|  | THRAP3         | STMN2    |  |
|  | THUMPD1        | STRAP    |  |
|  | THUMPD3        | STRBP    |  |
|  | THYN1          | STRN     |  |
|  | TIA1           | STRN3    |  |
|  | TIAL1          | STRN4    |  |
|  | TICRR          | STS      |  |
|  | TIMELESS       | STT3B    |  |
|  | TIMM10         | STX12    |  |
|  | TIMM17A        | STX1A    |  |
|  | TIMM21         | STX1B    |  |
|  | TIMM44         | STX5     |  |
|  | TIMM50         | STXBP1   |  |
|  | TIMM8B         | STXBP5   |  |
|  | TIMP2          | STXBP5L  |  |
|  | TINF2          | SUB1     |  |
|  | TIPIN          | SUCO     |  |
|  | TJAP1          | SUFU     |  |
|  | TJP1           | SUGP1    |  |
|  | TJP2           | SUGP2    |  |
|  | TK1            | SULT4A1  |  |
|  | TKT            | SUMO1    |  |
|  | TLE3           | SUMO2    |  |
|  | TLE4           | SUPT16H  |  |
|  | TLK1           | SUPT5H   |  |
|  | TLK2           | SUPT6H   |  |
|  | TLN1           | SURF4    |  |
|  | TM2D2          | SUV39H1  |  |
|  | TM9SF1         | SUV39H2  |  |
|  | TM9SF2         | SUV420H1 |  |
|  | TM9SF3         | SUV420H2 |  |
|  | TM9SF4         | SUZ12    |  |
|  | TMA7           | SVEP1    |  |
|  | TMBIM6         | SVOP     |  |
|  | TMED1          | SWT1     |  |

|  |                |          |  |
|--|----------------|----------|--|
|  | TMED10         | SYAP1    |  |
|  | TMED2          | SYCE3    |  |
|  | TMED4          | SYCP1    |  |
|  | TMED9          | SYCP2    |  |
|  | TMEFF1         | SYDE1    |  |
|  | TMEM109        | SYK      |  |
|  | TMEM11         | SYMPK    |  |
|  | TMEM123        | SYN1     |  |
|  | TMEM126A       | SYNCRIP  |  |
|  | TMEM127        | SYNGAP1  |  |
|  | TMEM128        | SYNGR3   |  |
|  | TMEM131        | SYNJ2BP  |  |
|  | TMEM132A       | SYNPO    |  |
|  | TMEM132C       | SYNRG    |  |
|  | TMEM138        | SYP      |  |
|  | TMEM147        | SYT1     |  |
|  | TMEM14B        | SYT11    |  |
|  | TMEM14C        | SYT13    |  |
|  | TMEM164        | SYT14    |  |
|  | TMEM165        | SYT2     |  |
|  | TMEM183A       | SYT3     |  |
|  | TMEM184B       | SYT7     |  |
|  | TMEM184C       | SYVN1    |  |
|  | TMEM189        | SZRD1    |  |
|  | TMEM2          | TAB2     |  |
|  | TMEM201        | TAB3     |  |
|  | TMEM214        | TAC1     |  |
|  | TMEM216        | TADA2B   |  |
|  | TMEM222        | TAF1     |  |
|  | TMEM223        | TAF10    |  |
|  | TMEM230        | TAF12    |  |
|  | TMEM234        | TAF1L    |  |
|  | TMEM243        | TAF3     |  |
|  | TMEM248        | TAF4     |  |
|  | TMEM256-PLSCR3 | TAF5     |  |
|  | TMEM258        | TAF5L    |  |
|  | TMEM259        | TAF7     |  |
|  | TMEM30A        | TAF7L    |  |
|  | TMEM33         | TAGAP    |  |
|  | TMEM39A        | TAL1     |  |
|  | TMEM39B        | TANC2    |  |
|  | TMEM43         | TANK     |  |
|  | TMEM47         | TAOK1    |  |
|  | TMEM50A        | TAOK2    |  |
|  | TMEM55A        | TAOK3    |  |
|  | TMEM55B        | TARDBP   |  |
|  | TMEM59         | TASP1    |  |
|  | TMEM63B        | TAZ      |  |
|  | TMEM65         | TBC1D10B |  |
|  | TMEM66         | TBC1D20  |  |
|  | TMEM9          | TBC1D25  |  |

|  |          |         |  |
|--|----------|---------|--|
|  | TMEM97   | TBC1D3  |  |
|  | TMEM98   | TBC1D30 |  |
|  | TMOD3    | TBCEL   |  |
|  | TMPO     | TBL1X   |  |
|  | TMSB10   | TBL1XR1 |  |
|  | TMSB4Y   | TBR1    |  |
|  | TMX1     | TBX1    |  |
|  | TNFAIP1  | TBX15   |  |
|  | TNFRSF19 | TBX18   |  |
|  | TNK2     | TBX2    |  |
|  | TNKS     | TBX20   |  |
|  | TNKS2    | TBX21   |  |
|  | TNPO1    | TBX22   |  |
|  | TNPO2    | TBX3    |  |
|  | TNPO3    | TBX4    |  |
|  | TNRC18   | TBX5    |  |
|  | TNRC6A   | TCEA1   |  |
|  | TNRC6C   | TCEAL1  |  |
|  | TNS3     | TCEAL3  |  |
|  | TOE1     | TCEAL4  |  |
|  | TOLLIP   | TCEAL5  |  |
|  | TOMM20   | TCEAL8  |  |
|  | TOMM22   | TCEB1   |  |
|  | TOMM34   | TCEB3   |  |
|  | TOMM40   | TCERG1  |  |
|  | TOMM5    | TCF12   |  |
|  | TOMM70A  | TCF15   |  |
|  | TONSL    | TCF20   |  |
|  | TOP1     | TCF21   |  |
|  | TOP2A    | TCF4    |  |
|  | TOP2B    | TCF7L2  |  |
|  | TOP3B    | TCFL5   |  |
|  | TOPBP1   | TCHHL1  |  |
|  | TOPORS   | TCOF1   |  |
|  | TOR1AIP1 | TCP1    |  |
|  | TOR1AIP2 | TDRD1   |  |
|  | TOR1B    | TDRD5   |  |
|  | TOX2     | TEAD1   |  |
|  | TOX3     | TEAD3   |  |
|  | TP53     | TECPR2  |  |
|  | TP53BP1  | TEF     |  |
|  | TP53BP2  | TEFM    |  |
|  | TP53I11  | TEK     |  |
|  | TPCN1    | TENM1   |  |
|  | TPD52L2  | TENM2   |  |
|  | TPI1     | TENM3   |  |
|  | TPM1     | TENM4   |  |
|  | TPM4     | TERF1   |  |
|  | TPP1     | TERF2   |  |
|  | TPP2     | TERT    |  |
|  | TPR      | TESK1   |  |

|  |         |                |  |
|--|---------|----------------|--|
|  | TPRG1L  | TET1           |  |
|  | TPT1    | TET3           |  |
|  | TPX2    | TEX10          |  |
|  | TRA2A   | TEX11          |  |
|  | TRA2B   | TFAP2A         |  |
|  | TRABD   | TFAP2B         |  |
|  | TRAF3   | TFAP2C         |  |
|  | TRAF4   | TFAP2D         |  |
|  | TRAF7   | TFAP4          |  |
|  | TRAM1   | TFCP2L1        |  |
|  | TRAP1   | TFDP1          |  |
|  | TRAPPC1 | TFDP2          |  |
|  | TRIL    | TFE3           |  |
|  | TRIM17  | TFEB           |  |
|  | TRIM24  | TGFA           |  |
|  | TRIM27  | TGFB2          |  |
|  | TRIM28  | TGFB3          |  |
|  | TRIM32  | TGFR1          |  |
|  | TRIM35  | TGIF2-C20orf24 |  |
|  | TRIM37  | THAP1          |  |
|  | TRIM44  | THAP11         |  |
|  | TRIM59  | THBS1          |  |
|  | TRIM7   | THBS2          |  |
|  | TRIM8   | THOC1          |  |
|  | TRIO    | THOC2          |  |
|  | TRIOBP  | THRAP3         |  |
|  | TRIP12  | THRB           |  |
|  | TRIP13  | THSD7A         |  |
|  | TRIP6   | TIAL1          |  |
|  | TRMT1   | TIAM1          |  |
|  | TRMT112 | TIMM8A         |  |
|  | TRMT2A  | TIMP2          |  |
|  | TRMT6   | TIMP3          |  |
|  | TRNT1   | TIPARP         |  |
|  | TRO     | TIPRL          |  |
|  | TROAP   | TJP1           |  |
|  | TROVE2  | TKTL1          |  |
|  | TRPC4AP | TLE1           |  |
|  | TRPM7   | TLE3           |  |
|  | TRRAP   | TLE4           |  |
|  | TRUB2   | TLK1           |  |
|  | TSC2    | TLK2           |  |
|  | TSC22D1 | TLN1           |  |
|  | TSEN15  | TLN2           |  |
|  | TSN     | TLR7           |  |
|  | TSNAX   | TLX1           |  |
|  | TSPAN13 | TM4SF2         |  |
|  | TSPAN14 | TM9SF2         |  |
|  | TSPAN18 | TM9SF3         |  |
|  | TSPAN3  | TM9SF4         |  |
|  | TSPAN31 | TMCC1          |  |

|  |         |           |  |
|--|---------|-----------|--|
|  | TSPAN6  | TMED10    |  |
|  | TSPAN9  | TMED2     |  |
|  | TSPYL1  | TMEFF1    |  |
|  | TSPYL2  | TMEM100   |  |
|  | TSR1    | TMEM108   |  |
|  | TSR2    | TMEM11    |  |
|  | TSSC4   | TMEM115   |  |
|  | TSTD2   | TMEM119   |  |
|  | TTC1    | TMEM121   |  |
|  | TTC3    | TMEM123   |  |
|  | TTC4    | TMEM131   |  |
|  | TTC9C   | TMEM132B  |  |
|  | TTF2    | TMEM132C  |  |
|  | TTI1    | TMEM132D  |  |
|  | TTK     | TMEM135   |  |
|  | TTLL12  | TMEM164   |  |
|  | TTLL4   | TMEM167B  |  |
|  | TTYH3   | TMEM170B  |  |
|  | TUBA1A  | TMEM178A  |  |
|  | TUBA1B  | TMEM178B  |  |
|  | TUBB    | TMEM179   |  |
|  | TUBB2A  | TMEM183A  |  |
|  | TUBB2B  | TMEM185B  |  |
|  | TUBB3   | TMEM194A  |  |
|  | TUBB4A  | TMEM200A  |  |
|  | TUBB4B  | TMEM201   |  |
|  | TUBB6   | TMEM203   |  |
|  | TUBG1   | TMEM204   |  |
|  | TUBGCP2 | TMEM210   |  |
|  | TUBGCP3 | TMEM229A  |  |
|  | TUBGCP4 | TMEM248   |  |
|  | TUBGCP6 | TMEM259   |  |
|  | TUFM    | TMEM30C   |  |
|  | TULP3   | TMEM35    |  |
|  | TUSC2   | TMEM39A   |  |
|  | TVP23A  | TMEM47    |  |
|  | TWF1    | TMEM55B   |  |
|  | TWIST1  | TMEM57    |  |
|  | TWISTNB | TMEM60    |  |
|  | TWSG1   | TMEM63B   |  |
|  | TXLNA   | TMEM72    |  |
|  | TXN     | TMEM89    |  |
|  | TXN2    | TMEM9B    |  |
|  | TXNDC12 | TMX2      |  |
|  | TXNDC17 | TNF       |  |
|  | TXNDC5  | TNFAIP3   |  |
|  | TXNL1   | TNFAIP8L1 |  |
|  | TXNL4A  | TNFRSF14  |  |
|  | TXNRD1  | TNFRSF1A  |  |
|  | TYMP    | TNFRSF1B  |  |
|  | TYRO3   | TNFRSF8   |  |



|  |         |                 |  |
|--|---------|-----------------|--|
|  | TYSND1  | TNFSF12         |  |
|  | U2AF1L4 | TNFSF12-TNFSF13 |  |
|  | U2AF2   | TNFSF13         |  |
|  | U2SURP  | TNFSF13B        |  |
|  | UBA1    | TNFSF8          |  |
|  | UBA2    | TNIK            |  |
|  | UBA3    | TNNC1           |  |
|  | UBA5    | TNPO1           |  |
|  | UBA52   | TNPO2           |  |
|  | UBA7    | TNR             |  |
|  | UBAC1   | TNRC18          |  |
|  | UBAC2   | TNRC6A          |  |
|  | UBALD2  | TNRC6B          |  |
|  | UBAP1   | TNRC6C          |  |
|  | UBAP2   | TNS3            |  |
|  | UBAP2L  | TOB1            |  |
|  | UBC     | TOB2            |  |
|  | UBE2B   | TOMM22          |  |
|  | UBE2C   | TOMM40          |  |
|  | UBE2D1  | TOMM40L         |  |
|  | UBE2D2  | TOMM70A         |  |
|  | UBE2D3  | TOP1            |  |
|  | UBE2E1  | TOP2A           |  |
|  | UBE2E3  | TOP2B           |  |
|  | UBE2G1  | TOPAZ1          |  |
|  | UBE2G2  | TOPBP1          |  |
|  | UBE2H   | TOPORS          |  |
|  | UBE2I   | TOR4A           |  |
|  | UBE2K   | TOX             |  |
|  | UBE2L3  | TOX3            |  |
|  | UBE2M   | TOX4            |  |
|  | UBE2N   | TP53            |  |
|  | UBE2O   | TP53BP1         |  |
|  | UBE2Q1  | TP53INP2        |  |
|  | UBE2R2  | TP63            |  |
|  | UBE2S   | TP73            |  |
|  | UBE2V1  | TPP2            |  |
|  | UBE2Z   | TPR             |  |
|  | UBE3B   | TPT1            |  |
|  | UBE3C   | TPX2            |  |
|  | UBE4B   | TRA2B           |  |
|  | UBFD1   | TRABD2B         |  |
|  | UBIAD1  | TRAF2           |  |
|  | UBL7    | TRAF3           |  |
|  | UBN1    | TRAF4           |  |
|  | UBP1    | TRAF6           |  |
|  | UBQLN1  | TRAM1           |  |
|  | UBQLN2  | TRAM2           |  |
|  | UBQLN4  | TRAPPC10        |  |
|  | UBR2    | TRAPPC8         |  |
|  | UBR4    | TRERF1          |  |

|  |         |              |  |
|--|---------|--------------|--|
|  | UBR5    | TREX1        |  |
|  | UBR7    | TRIB1        |  |
|  | UBTD2   | TRIB2        |  |
|  | UBTF    | TRIM11       |  |
|  | UBXN1   | TRIM13       |  |
|  | UBXN4   | TRIM2        |  |
|  | UBXN6   | TRIM24       |  |
|  | UHL1    | TRIM27       |  |
|  | UHL3    | TRIM28       |  |
|  | UHL5    | TRIM3        |  |
|  | UCK1    | TRIM33       |  |
|  | UCK2    | TRIM39       |  |
|  | UFC1    | TRIM39-RPP21 |  |
|  | UFD1L   | TRIM41       |  |
|  | UFSP2   | TRIM46       |  |
|  | UGCG    | TRIM67       |  |
|  | UGDH    | TRIM71       |  |
|  | UGGT1   | TRIM8        |  |
|  | UHRF1   | TRIM9        |  |
|  | UHRF2   | TRIO         |  |
|  | ULK1    | TRIP12       |  |
|  | UMPS    | TRIP13       |  |
|  | UNC119  | TRMT1L       |  |
|  | UNC119B | TROVE2       |  |
|  | UNG     | TRPC4AP      |  |
|  | UNK     | TRPC5        |  |
|  | UPF1    | TRPS1        |  |
|  | UQCC2   | TRRAP        |  |
|  | UQCR10  | TSC1         |  |
|  | UQCRC1  | TSC2         |  |
|  | UQCRC2  | TSC22D1      |  |
|  | UQCRFS1 | TSC22D2      |  |
|  | UQCRH   | TSC22D4      |  |
|  | UQCRQ   | TSHZ1        |  |
|  | URI1    | TSHZ2        |  |
|  | UROD    | TSHZ3        |  |
|  | USB1    | TSKS         |  |
|  | USF1    | TSKU         |  |
|  | USF2    | TSN          |  |
|  | USMG5   | TSPAN12      |  |
|  | USP1    | TSPAN14      |  |
|  | USP10   | TSPAN5       |  |
|  | USP11   | TSPAN7       |  |
|  | USP14   | TSPAN9       |  |
|  | USP19   | TSPYL2       |  |
|  | USP20   | TSPYL5       |  |
|  | USP21   | TSR2         |  |
|  | USP22   | TSSK6        |  |
|  | USP25   | TTBK1        |  |
|  | USP28   | TTBK2        |  |
|  | USP3    | TTC17        |  |

|  |         |         |  |
|--|---------|---------|--|
|  | USP33   | TTC28   |  |
|  | USP34   | TTC7B   |  |
|  | USP39   | TTR     |  |
|  | USP4    | TTYH1   |  |
|  | USP42   | TTYH3   |  |
|  | USP46   | TUBA1A  |  |
|  | USP47   | TUBA1B  |  |
|  | USP48   | TUBB    |  |
|  | USP49   | TUBB2A  |  |
|  | USP5    | TUBB2B  |  |
|  | USP6NL  | TUBB3   |  |
|  | USP7    | TUBB4B  |  |
|  | USP8    | TULP4   |  |
|  | USP9X   | TUSC2   |  |
|  | UTP15   | TWF2    |  |
|  | UTP3    | TWIST2  |  |
|  | UTP6    | TWISTNB |  |
|  | VAC14   | TXLNA   |  |
|  | VAMP2   | TXLNG   |  |
|  | VAMP3   | TXNDC2  |  |
|  | VANGL2  | TXNL1   |  |
|  | VAPA    | TYMS    |  |
|  | VAPB    | U2AF1   |  |
|  | VARS    | U2AF2   |  |
|  | VASH1   | U2SURP  |  |
|  | VASP    | UBA1    |  |
|  | VAV2    | UBA2    |  |
|  | VBP1    | UBA3    |  |
|  | VCAN    | UBA52   |  |
|  | VCL     | UBALD1  |  |
|  | VCP     | UBAP1   |  |
|  | VCPKMT  | UBAP2L  |  |
|  | VDAC1   | UBE2A   |  |
|  | VDAC2   | UBE2D2  |  |
|  | VEGFA   | UBE2E1  |  |
|  | VEGFB   | UBE2E2  |  |
|  | VEZF1   | UBE2F   |  |
|  | VHL     | UBE2G1  |  |
|  | VIM     | UBE2H   |  |
|  | VIPAS39 | UBE2I   |  |
|  | VPRBP   | UBE2J2  |  |
|  | VPS16   | UBE2K   |  |
|  | VPS25   | UBE2L3  |  |
|  | VPS26A  | UBE2M   |  |
|  | VPS26B  | UBE2N   |  |
|  | VPS28   | UBE2O   |  |
|  | VPS29   | UBE2Q1  |  |
|  | VPS33A  | UBE2QL1 |  |
|  | VPS35   | UBE2R2  |  |
|  | VPS36   | UBE2S   |  |
|  | VPS41   | UBE2Z   |  |

|  |         |         |  |
|--|---------|---------|--|
|  | VPS4A   | UBE3A   |  |
|  | VPS4B   | UBE3C   |  |
|  | VPS51   | UBE4B   |  |
|  | VPS52   | UBFD1   |  |
|  | VPS54   | UBL3    |  |
|  | VPS72   | UBN1    |  |
|  | VRK1    | UBN2    |  |
|  | VTA1    | UBP1    |  |
|  | VWA9    | UBQLN1  |  |
|  | WAC     | UBQLN2  |  |
|  | WAPAL   | UBQLN4  |  |
|  | WARS    | UBR2    |  |
|  | WASF1   | UBR3    |  |
|  | WASF2   | UBR4    |  |
|  | WASF3   | UBR5    |  |
|  | WASL    | UBTD1   |  |
|  | WBP1    | UBTF    |  |
|  | WBP11   | UBXN1   |  |
|  | WBP1L   | UBXN7   |  |
|  | WBP2    | UCHL1   |  |
|  | WBP5    | UCK2    |  |
|  | WBSCR22 | UFD1L   |  |
|  | WDFY3   | UGCG    |  |
|  | WDHD1   | UHMK1   |  |
|  | WDR1    | UHRF2   |  |
|  | WDR18   | ULK1    |  |
|  | WDR26   | UNC119B |  |
|  | WDR36   | UNC13A  |  |
|  | WDR4    | UNC5A   |  |
|  | WDR43   | UNC5D   |  |
|  | WDR45B  | UNC79   |  |
|  | WDR46   | UNCX    |  |
|  | WDR48   | UNK     |  |
|  | WDR5    | UNKL    |  |
|  | WDR55   | UPF1    |  |
|  | WDR6    | UPF2    |  |
|  | WDR61   | UPF3B   |  |
|  | WDR70   | UPRT    |  |
|  | WDR74   | URGCP   |  |
|  | WDR75   | USF2    |  |
|  | WDR77   | USP1    |  |
|  | WDR82   | USP10   |  |
|  | WDR89   | USP11   |  |
|  | WDR90   | USP12   |  |
|  | WDTC1   | USP14   |  |
|  | WEE1    | USP15   |  |
|  | WHSC1   | USP19   |  |
|  | WIBG    | USP22   |  |
|  | WIPI2   | USP24   |  |
|  | WIZ     | USP25   |  |
|  | WLS     | USP27X  |  |

|  |         |          |  |
|--|---------|----------|--|
|  | WNK1    | USP3     |  |
|  | WNT5A   | USP32    |  |
|  | WNT7B   | USP33    |  |
|  | WRB     | USP34    |  |
|  | WSB1    | USP37    |  |
|  | WTIP    | USP42    |  |
|  | WWC1    | USP46    |  |
|  | XAB2    | USP47    |  |
|  | XBP1    | USP48    |  |
|  | XPNPEP1 | USP49    |  |
|  | XPO1    | USP5     |  |
|  | XPO5    | USP7     |  |
|  | XPO6    | USP8     |  |
|  | XPO7    | USP9X    |  |
|  | XPOT    | UTF1     |  |
|  | XRCC1   | UTP14A   |  |
|  | XRCC3   | UTP15    |  |
|  | XRCC5   | UTY      |  |
|  | XRN2    | UVRAG    |  |
|  | XXYL1   | UXT      |  |
|  | YAF2    | VAMP2    |  |
|  | YAP1    | VANGL2   |  |
|  | YARS    | VAPB     |  |
|  | YBX1    | VASN     |  |
|  | YBX3    | VASP     |  |
|  | YEATS2  | VAV1     |  |
|  | YEATS4  | VAX1     |  |
|  | YIF1B   | VBP1     |  |
|  | YIPF2   | VCAM1    |  |
|  | YIPF3   | VCAN     |  |
|  | YIPF5   | VCP      |  |
|  | YKT6    | VCPIP1   |  |
|  | YLPM1   | VDAC1    |  |
|  | YME1L1  | VDAC2    |  |
|  | YRDC    | VDAC3    |  |
|  | YTHDC1  | VEZF1    |  |
|  | YTHDF1  | VEGF     |  |
|  | YTHDF2  | VGLL1    |  |
|  | YTHDF3  | VGLL2    |  |
|  | YWHAB   | VIM      |  |
|  | YWHAE   | VKORC1L1 |  |
|  | YWHAG   | VMA21    |  |
|  | YWHAH   | VMP1     |  |
|  | YWHAQ   | VPRBP    |  |
|  | YWHAZ   | VPS26A   |  |
|  | YY1     | VPS26B   |  |
|  | YY1AP1  | VPS29    |  |
|  | ZBED3   | VPS35    |  |
|  | ZBTB12  | VPS37D   |  |
|  | ZBTB16  | VPS4A    |  |
|  | ZBTB18  | VPS54    |  |

|  |              |         |  |
|--|--------------|---------|--|
|  | ZBTB39       | VRTN    |  |
|  | ZC3H11A      | VWC2    |  |
|  | ZC3H13       | WAC     |  |
|  | ZC3H14       | WAPAL   |  |
|  | ZC3H15       | WAS     |  |
|  | ZC3H18       | WASF1   |  |
|  | ZC3H3        | WASF2   |  |
|  | ZC3H4        | WASF3   |  |
|  | ZC3H7B       | WASL    |  |
|  | ZC3HAV1L     | WBP11   |  |
|  | ZC3HC1       | WBP1L   |  |
|  | ZCCHC11      | WDFY3   |  |
|  | ZCCHC14      | WDR1    |  |
|  | ZCCHC3       | WDR13   |  |
|  | ZCCHC8       | WDR18   |  |
|  | ZCRB1        | WDR20   |  |
|  | ZDHHC16      | WDR26   |  |
|  | ZDHHC3       | WDR33   |  |
|  | ZDHHC5       | WDR37   |  |
|  | ZDHHC8       | WDR43   |  |
|  | ZEB1         | WDR44   |  |
|  | ZFAND3       | WDR45   |  |
|  | ZFAND5       | WDR48   |  |
|  | ZFAND6       | WDR5    |  |
|  | ZFP36L1      | WDR7    |  |
|  | ZFP36L2      | WDR82   |  |
|  | ZFP41        | WDTC1   |  |
|  | ZFP57        | WEE1    |  |
|  | ZFP62        | WFDC2   |  |
|  | ZFP91        | WHSC1   |  |
|  | ZFP91-CNTF   | WHSC1L1 |  |
|  | ZFPL1        | WIPF1   |  |
|  | ZFR          | WIZ     |  |
|  | ZFYVE21      | WNK1    |  |
|  | ZGPAT        | WNK2    |  |
|  | ZHX1-C8ORF76 | WNK3    |  |
|  | ZIC1         | WNT3    |  |
|  | ZIC2         | WNT3A   |  |
|  | ZIK1         | WNT5A   |  |
|  | ZKSCAN4      | WNT5B   |  |
|  | ZMAT2        | WNT9A   |  |
|  | ZMAT3        | WNT9B   |  |
|  | ZMIZ1        | WSB2    |  |
|  | ZMIZ2        | WSCD2   |  |
|  | ZMYM2        | WT1     |  |
|  | ZMYM3        | WTAP    |  |
|  | ZMYM4        | WWC3    |  |
|  | ZMYND11      | WWP1    |  |
|  | ZMYND19      | WWTR1   |  |
|  | ZMYND8       | XAB2    |  |
|  | ZNF106       | XIAP    |  |

|  |         |        |  |
|--|---------|--------|--|
|  | ZNF12   | XK     |  |
|  | ZNF124  | XKR4   |  |
|  | ZNF146  | XKR6   |  |
|  | ZNF207  | XKR7   |  |
|  | ZNF219  | XPO1   |  |
|  | ZNF22   | XPO4   |  |
|  | ZNF232  | XPO5   |  |
|  | ZNF24   | XPO6   |  |
|  | ZNF260  | XPO7   |  |
|  | ZNF275  | XPOT   |  |
|  | ZNF28   | XPR1   |  |
|  | ZNF280B | XRCC5  |  |
|  | ZNF280C | XRCC6  |  |
|  | ZNF281  | XRN1   |  |
|  | ZNF320  | XYLT1  |  |
|  | ZNF322  | XYLT2  |  |
|  | ZNF334  | YAF2   |  |
|  | ZNF335  | YAP1   |  |
|  | ZNF354C | YBX1   |  |
|  | ZNF358  | YBX2   |  |
|  | ZNF362  | YEATS2 |  |
|  | ZNF385A | YIPF5  |  |
|  | ZNF395  | YIPF6  |  |
|  | ZNF397  | YLPM1  |  |
|  | ZNF414  | YPEL1  |  |
|  | ZNF415  | YPEL2  |  |
|  | ZNF423  | YTHDC1 |  |
|  | ZNF426  | YTHDC2 |  |
|  | ZNF445  | YTHDF1 |  |
|  | ZNF451  | YTHDF2 |  |
|  | ZNF462  | YTHDF3 |  |
|  | ZNF468  | YWHAB  |  |
|  | ZNF48   | YWHAE  |  |
|  | ZNF480  | YWHAG  |  |
|  | ZNF488  | YWHAH  |  |
|  | ZNF496  | YWHAQ  |  |
|  | ZNF507  | YWHAZ  |  |
|  | ZNF512  | YY1    |  |
|  | ZNF512B | ZAP70  |  |
|  | ZNF516  | ZBED4  |  |
|  | ZNF518B | ZBED5  |  |
|  | ZNF521  | ZBTB1  |  |
|  | ZNF532  | ZBTB10 |  |
|  | ZNF534  | ZBTB12 |  |
|  | ZNF561  | ZBTB16 |  |
|  | ZNF562  | ZBTB17 |  |
|  | ZNF574  | ZBTB18 |  |
|  | ZNF578  | ZBTB2  |  |
|  | ZNF580  | ZBTB20 |  |
|  | ZNF598  | ZBTB21 |  |
|  | ZNF608  | ZBTB33 |  |

|  |         |         |  |
|--|---------|---------|--|
|  | ZNF609  | ZBTB34  |  |
|  | ZNF610  | ZBTB37  |  |
|  | ZNF611  | ZBTB38  |  |
|  | ZNF618  | ZBTB4   |  |
|  | ZNF629  | ZBTB43  |  |
|  | ZNF639  | ZBTB44  |  |
|  | ZNF646  | ZBTB46  |  |
|  | ZNF664  | ZBTB47  |  |
|  | ZNF677  | ZBTB5   |  |
|  | ZNF687  | ZBTB7A  |  |
|  | ZNF692  | ZBTB8OS |  |
|  | ZNF701  | ZC3H11A |  |
|  | ZNF706  | ZC3H12B |  |
|  | ZNF710  | ZC3H12C |  |
|  | ZNF740  | ZC3H13  |  |
|  | ZNF746  | ZC3H14  |  |
|  | ZNF76   | ZC3H15  |  |
|  | ZNF765  | ZC3H18  |  |
|  | ZNF766  | ZC3H4   |  |
|  | ZNF768  | ZC3H7A  |  |
|  | ZNF771  | ZC3H7B  |  |
|  | ZNF780B | ZC4H2   |  |
|  | ZNF813  | ZCCHC11 |  |
|  | ZNF816  | ZCCHC14 |  |
|  | ZNF83   | ZCCHC2  |  |
|  | ZNF860  | ZCCHC24 |  |
|  | ZNF880  | ZCCHC6  |  |
|  | ZRANB2  | ZCCHC8  |  |
|  | ZSCAN21 | ZDHHC14 |  |
|  | ZSWIM4  | ZDHHC15 |  |
|  | ZSWIM5  | ZDHHC17 |  |
|  | ZSWIM6  | ZDHHC5  |  |
|  | ZSWIM8  | ZDHHC8  |  |
|  | ZWILCH  | ZDHHC9  |  |
|  | ZWINT   | ZEB1    |  |
|  | ZYX     | ZEB2    |  |
|  | ZZZ3    | ZER1    |  |
|  |         | ZFAND3  |  |
|  |         | ZFAND5  |  |
|  |         | ZFC3H1  |  |
|  |         | ZFHX2   |  |
|  |         | ZFHX3   |  |
|  |         | ZFHX4   |  |
|  |         | ZFP36   |  |
|  |         | ZFP36L1 |  |
|  |         | ZFP36L2 |  |
|  |         | ZFP62   |  |
|  |         | ZFP82   |  |
|  |         | ZFP91   |  |
|  |         | ZFP92   |  |
|  |         | ZFPM2   |  |



|  |  |         |  |
|--|--|---------|--|
|  |  | ZFR     |  |
|  |  | ZFX     |  |
|  |  | ZFY     |  |
|  |  | ZFYVE9  |  |
|  |  | ZG16    |  |
|  |  | ZHX1    |  |
|  |  | ZIC1    |  |
|  |  | ZIC2    |  |
|  |  | ZIC3    |  |
|  |  | ZIC5    |  |
|  |  | ZKSCAN1 |  |
|  |  | ZMAT2   |  |
|  |  | ZMIZ1   |  |
|  |  | ZMIZ2   |  |
|  |  | ZMYM2   |  |
|  |  | ZMYM3   |  |
|  |  | ZMYM4   |  |
|  |  | ZMYND11 |  |
|  |  | ZMYND19 |  |
|  |  | ZMYND8  |  |
|  |  | ZNF101  |  |
|  |  | ZNF131  |  |
|  |  | ZNF146  |  |
|  |  | ZNF148  |  |
|  |  | ZNF182  |  |
|  |  | ZNF202  |  |
|  |  | ZNF217  |  |
|  |  | ZNF219  |  |
|  |  | ZNF236  |  |
|  |  | ZNF24   |  |
|  |  | ZNF280C |  |
|  |  | ZNF281  |  |
|  |  | ZNF287  |  |
|  |  | ZNF292  |  |
|  |  | ZNF296  |  |
|  |  | ZNF319  |  |
|  |  | ZNF326  |  |
|  |  | ZNF331  |  |
|  |  | ZNF358  |  |
|  |  | ZNF362  |  |
|  |  | ZNF367  |  |
|  |  | ZNF384  |  |
|  |  | ZNF385D |  |
|  |  | ZNF407  |  |
|  |  | ZNF423  |  |
|  |  | ZNF428  |  |
|  |  | ZNF444  |  |
|  |  | ZNF445  |  |
|  |  | ZNF449  |  |
|  |  | ZNF460  |  |
|  |  | ZNF462  |  |

|  |  |         |  |
|--|--|---------|--|
|  |  | ZNF469  |  |
|  |  | ZNF483  |  |
|  |  | ZNF496  |  |
|  |  | ZNF503  |  |
|  |  | ZNF512  |  |
|  |  | ZNF512B |  |
|  |  | ZNF513  |  |
|  |  | ZNF516  |  |
|  |  | ZNF521  |  |
|  |  | ZNF526  |  |
|  |  | ZNF532  |  |
|  |  | ZNF536  |  |
|  |  | ZNF541  |  |
|  |  | ZNF563  |  |
|  |  | ZNF579  |  |
|  |  | ZNF580  |  |
|  |  | ZNF592  |  |
|  |  | ZNF598  |  |
|  |  | ZNF608  |  |
|  |  | ZNF609  |  |
|  |  | ZNF618  |  |
|  |  | ZNF625  |  |
|  |  | ZNF628  |  |
|  |  | ZNF629  |  |
|  |  | ZNF638  |  |
|  |  | ZNF644  |  |
|  |  | ZNF652  |  |
|  |  | ZNF654  |  |
|  |  | ZNF687  |  |
|  |  | ZNF691  |  |
|  |  | ZNF704  |  |
|  |  | ZNF706  |  |
|  |  | ZNF710  |  |
|  |  | ZNF711  |  |
|  |  | ZNF746  |  |
|  |  | ZNF750  |  |
|  |  | ZNF770  |  |
|  |  | ZNF777  |  |
|  |  | ZNF784  |  |
|  |  | ZNF787  |  |
|  |  | ZNF800  |  |
|  |  | ZNF81   |  |
|  |  | ZNF813  |  |
|  |  | ZNF827  |  |
|  |  | ZNF850  |  |
|  |  | ZNF865  |  |
|  |  | ZNFX1   |  |
|  |  | ZNRF1   |  |
|  |  | ZNRF3   |  |
|  |  | ZRANB1  |  |
|  |  | ZRANB2  |  |

|  |  |        |  |
|--|--|--------|--|
|  |  | ZRSR2  |  |
|  |  | ZSWIM6 |  |
|  |  | ZSWIM8 |  |
|  |  | ZXDB   |  |
|  |  | ZYG11B |  |
|  |  | ZZEF1  |  |
|  |  | ZZZ3   |  |

eTable 2: Gene variants

| Type      | Chromosome | Position | Reference | Alternative | Class | Gene      | Amino acid change | chromatin_gene | HBE_gene | NDD_gene | pLI_gene |
|-----------|------------|----------|-----------|-------------|-------|-----------|-------------------|----------------|----------|----------|----------|
| pLOF      | 1          | 878099   | G         | GC          | lof   | SAMD11    | p.A409fs          | FALSE          | FALSE    | FALSE    | FALSE    |
| pLOF      | 1          | 900382   | C         | A           | lof   | KLHL17    | p.Y580X           | FALSE          | TRUE     | FALSE    | FALSE    |
| pLOF      | 1          | 2116727  | TC        | T           | lof   | FAAP20    | p.E145fs          | FALSE          | FALSE    | FALSE    | FALSE    |
| dDNV/pLOF | 1          | 2337260  | AG        | A           | lof   | PEX10     | p.Leu329fs        | FALSE          | FALSE    | FALSE    | FALSE    |
| pLOF      | 1          | 3385463  | T         | TG          | lof   | ARHGEF16  | p.L275fs          | FALSE          | FALSE    | FALSE    | FALSE    |
| pLOF      | 1          | 3415312  | G         | C           | lof   | MEGF6     | p.S1058X          | FALSE          | TRUE     | FALSE    | FALSE    |
| pLOF      | 1          | 3679753  | G         | T           | lof   | CCDC27    | p.Glu346*         | FALSE          | FALSE    | FALSE    | FALSE    |
| pLOF      | 1          | 6270017  | C         | T           | lof   | RNF207    | p.Q263X           | FALSE          | FALSE    | FALSE    | FALSE    |
| pLOF      | 1          | 11718389 | C         | T           | lof   | FBXO44    | p.R111X           | FALSE          | FALSE    | FALSE    | FALSE    |
| pLOF      | 1          | 12082289 | C         | CT          | lof   | MIIP      | p.Arg85fs         | FALSE          | FALSE    | FALSE    | FALSE    |
| pLOF      | 1          | 12815741 | G         | A           | lof   | C1orf158  | p.W68X            | FALSE          | FALSE    | FALSE    | FALSE    |
| pLOF      | 1          | 16268676 | G         | A           | lof   | ZBTB17    | p.Q734X           | FALSE          | FALSE    | FALSE    | TRUE     |
| pLOF      | 1          | 17331558 | AG        | A           | lof   | ATP13A2   | p.S99fs           | FALSE          | TRUE     | FALSE    | FALSE    |
| pLOF      | 1          | 17698832 | C         | CA          | lof   | PADI6     | p.T31fs           | FALSE          | FALSE    | FALSE    | FALSE    |
| dDNV      | 1          | 17982581 | G         | A           | misD  | ARHGEF10L | p.G897R           | FALSE          | FALSE    | FALSE    | FALSE    |
| dDNV      | 1          | 18960820 | C         | T           | misD  | PAX7      | p.Arg37Trp        | TRUE           | TRUE     | FALSE    | FALSE    |
| pLOF      | 1          | 19493548 | G         | T           | lof   | UBR4      | p.Y1359X          | FALSE          | TRUE     | FALSE    | TRUE     |
| dDNV      | 1          | 23760827 | G         | A           | misD  | ASAP3     | p.T624M           | FALSE          | FALSE    | FALSE    | FALSE    |
| pLOF      | 1          | 24201921 | G         | A           | lof   | CNR2      | p.Q63X            | FALSE          | FALSE    | FALSE    | FALSE    |
| pLOF      | 1          | 26314721 | C         | T           | lof   | PAFAH2    | .                 | FALSE          | FALSE    | FALSE    | FALSE    |
| pLOF      | 1          | 27120882 | A         | AG          | lof   | PIGV      | p.V119fs          | FALSE          | FALSE    | FALSE    | FALSE    |
| pLOF      | 1          | 32126666 | C         | T           | lof   | COL16A1   | .                 | FALSE          | FALSE    | FALSE    | FALSE    |
| pLOF      | 1          | 32673556 | GA        | G           | lof   | IQCC      | p.G425fs          | FALSE          | FALSE    | FALSE    | FALSE    |

|      |   |          |                       |    |      |           |            |        |        |        |        |
|------|---|----------|-----------------------|----|------|-----------|------------|--------|--------|--------|--------|
| pLOF | 1 | 36921868 | C                     | A  | lof  | MRP S15   | p.G186X    | FALS E | TRUE   | FALS E | FALS E |
| pLOF | 1 | 43111990 | T                     | C  | lof  | CCD C30   | .          | FALS E | FALS E | FALS E | FALS E |
| pLOF | 1 | 43621982 | T                     | A  | lof  | FAM1 83A  | p.X135K    | FALS E | FALS E | FALS E | FALS E |
| pLOF | 1 | 44482802 | TCAT TC               | T  | lof  | SLC6 A9   | .          | FALS E | FALS E | FALS E | FALS E |
| pLOF | 1 | 45286377 | C                     | T  | lof  | PTCH 2    | .          | FALS E | FALS E | FALS E | FALS E |
| pLOF | 1 | 45288993 | GC                    | G  | lof  | PTCH 2    | p.A1060fs  | FALS E | FALS E | FALS E | FALS E |
| dDNV | 1 | 46976691 | G                     | C  | misD | DMB X1    | p.E140Q    | FALS E | FALS E | FALS E | TRUE   |
| pLOF | 1 | 47155310 | AGG TGAC GGA ATGA TCT | A  | lof  | EFCA B14  | p.Q243fs   | FALS E | FALS E | FALS E | FALS E |
| pLOF | 1 | 51584441 | C                     | T  | lof  | C1orf 185 | p.R76X     | FALS E | FALS E | FALS E | FALS E |
| pLOF | 1 | 53287121 | T                     | G  | lof  | ZYG1 1B   | p.Tyr 685* | FALS E | FALS E | FALS E | TRUE   |
| pLOF | 1 | 53442354 | G                     | C  | lof  | SCP2      | .          | FALS E | FALS E | FALS E | FALS E |
| pLOF | 1 | 54661184 | AG                    | A  | lof  | CYB5 RL   | p.P35fs    | FALS E | FALS E | FALS E | FALS E |
| pLOF | 1 | 55472702 | G                     | A  | lof  | BSND      | p.W102X    | FALS E | FALS E | FALS E | FALS E |
| pLOF | 1 | 62672651 | G                     | GA | lof  | L1TD 1    | p.G117fs   | FALS E | FALS E | FALS E | FALS E |
| pLOF | 1 | 63988799 | C                     | T  | lof  | ITGB 3BP  | .          | TRUE   | FALS E | FALS E | FALS E |
| pLOF | 1 | 72748169 | C                     | T  | lof  | NEG R1    | p.Met 1?   | FALS E | FALS E | FALS E | TRUE   |
| pLOF | 1 | 76378513 | A                     | T  | lof  | MSH4      | p.K918X    | FALS E | FALS E | FALS E | FALS E |
| pLOF | 1 | 86611813 | GC                    | G  | lof  | COL2 4A1  | p.A37fs    | FALS E | FALS E | FALS E | FALS E |
| pLOF | 1 | 93091493 | T                     | C  | lof  | EVI5      | .          | FALS E | FALS E | FALS E | FALS E |
| pLOF | 1 | 95290047 | A                     | G  | lof  | SLC4 4A3  | .          | FALS E | FALS E | FALS E | FALS E |

|      |   |              |                                                                                                                                                                                                         |    |     |                   |                |           |           |           |           |
|------|---|--------------|---------------------------------------------------------------------------------------------------------------------------------------------------------------------------------------------------------|----|-----|-------------------|----------------|-----------|-----------|-----------|-----------|
| pLOF | 1 | 95712<br>211 | AAG<br>GTAT<br>AATT<br>TAGT<br>ACTA<br>TTGC<br>AGAT<br>GGA<br>AAAG<br>CAAC<br>TGAA<br>TCGA<br>TAAT<br>TATA<br>CTCT<br>GAC<br>AAAT<br>CTAG<br>GCAT<br>ATTC<br>ATGA<br>GTTT<br>CTTT<br>TGTA<br>TAAT<br>GC | A  | lof | RWD<br>D3         | p.R21<br>5fs   | FALS<br>E | FALS<br>E | FALS<br>E | FALS<br>E |
| pLOF | 1 | 1.01E<br>+08 | C                                                                                                                                                                                                       | G  | lof | CDC1<br>4A        | p.Y13<br>9X    | FALS<br>E | FALS<br>E | FALS<br>E | FALS<br>E |
| pLOF | 1 | 1.08E<br>+08 | G                                                                                                                                                                                                       | A  | lof | VAV3              | p.R58<br>4X    | FALS<br>E | FALS<br>E | FALS<br>E | FALS<br>E |
| pLOF | 1 | 1.09E<br>+08 | T                                                                                                                                                                                                       | TA | lof | FNDC<br>7         | p.I463<br>fs   | FALS<br>E | FALS<br>E | FALS<br>E | FALS<br>E |
| pLOF | 1 | 1.1E+<br>08  | A                                                                                                                                                                                                       | AG | lof | EPS8<br>L3        | p.L47<br>0fs   | FALS<br>E | FALS<br>E | FALS<br>E | FALS<br>E |
| pLOF | 1 | 1.12E<br>+08 | A                                                                                                                                                                                                       | G  | lof | FAM2<br>12B       | p.X28<br>3R    | FALS<br>E | FALS<br>E | FALS<br>E | FALS<br>E |
| pLOF | 1 | 1.13E<br>+08 | AT                                                                                                                                                                                                      | A  | lof | CTTN<br>BP2N<br>L | p.Ser<br>549fs | FALS<br>E | FALS<br>E | FALS<br>E | FALS<br>E |
| pLOF | 1 | 1.19E<br>+08 | A                                                                                                                                                                                                       | T  | lof | SPAG<br>17        | p.Y15<br>58X   | FALS<br>E | FALS<br>E | FALS<br>E | FALS<br>E |
| pLOF | 1 | 1.19E<br>+08 | A                                                                                                                                                                                                       | AG | lof | SPAG<br>17        | p.P13<br>75fs  | FALS<br>E | FALS<br>E | FALS<br>E | FALS<br>E |
| pLOF | 1 | 1.2E+<br>08  | C                                                                                                                                                                                                       | A  | lof | NOT<br>CH2        | .              | FALS<br>E | TRUE      | FALS<br>E | TRUE      |
| pLOF | 1 | 1.45E<br>+08 | C                                                                                                                                                                                                       | A  | lof | PDE4<br>DIP       | p.E33<br>0X    | FALS<br>E | FALS<br>E | FALS<br>E | FALS<br>E |
| pLOF | 1 | 1.45E<br>+08 | C                                                                                                                                                                                                       | CT | lof | TXNI<br>P         | p.Val<br>180fs | FALS<br>E | FALS<br>E | FALS<br>E | FALS<br>E |
| pLOF | 1 | 1.45E<br>+08 | TG                                                                                                                                                                                                      | T  | lof | ANKR<br>D34A      | p.G49<br>2fs   | FALS<br>E | FALS<br>E | FALS<br>E | TRUE      |
| pLOF | 1 | 1.47E<br>+08 | T                                                                                                                                                                                                       | TA | lof | CHD1<br>L         | p.L36f<br>s    | TRUE      | FALS<br>E | FALS<br>E | FALS<br>E |
| pLOF | 1 | 1.5E+<br>08  | AG                                                                                                                                                                                                      | A  | lof | SV2A              | p.A22<br>6fs   | FALS<br>E | FALS<br>E | FALS<br>E | FALS<br>E |

|           |   |          |     |   |      |         |                 |       |       |       |       |
|-----------|---|----------|-----|---|------|---------|-----------------|-------|-------|-------|-------|
| pLOF      | 1 | 1.51E+08 | G   | A | lof  | C1orf56 | p.W323X         | FALSE | FALSE | FALSE | FALSE |
| pLOF      | 1 | 1.51E+08 | G   | A | lof  | PI4KB   | p.R333X         | FALSE | FALSE | FALSE | TRUE  |
| dDNV/pLOF | 1 | 1.52E+08 | C   | T | lof  | OAZ3    | UNK<br>NOW<br>N | FALSE | FALSE | FALSE | FALSE |
| pLOF      | 1 | 1.53E+08 | C   | T | lof  | IVL     | p.Q446X         | FALSE | FALSE | FALSE | FALSE |
| pLOF      | 1 | 1.54E+08 | G   | A | lof  | SLC39A1 | p.Q66X          | FALSE | FALSE | FALSE | FALSE |
| pLOF      | 1 | 1.54E+08 | C   | T | lof  | TPM3    | NA              | FALSE | FALSE | FALSE | FALSE |
| pLOF      | 1 | 1.54E+08 | G   | A | lof  | C1orf43 | p.R65X          | FALSE | FALSE | FALSE | FALSE |
| pLOF      | 1 | 1.54E+08 | G   | C | lof  | IL6R    | .               | FALSE | FALSE | FALSE | FALSE |
| pLOF      | 1 | 1.55E+08 | C   | G | lof  | EFNA4   | p.Y94X          | FALSE | FALSE | FALSE | FALSE |
| pLOF      | 1 | 1.57E+08 | CT  | C | lof  | MRPL24  | p.K100fs        | FALSE | TRUE  | FALSE | FALSE |
| pLOF      | 1 | 1.61E+08 | CTG | C | lof  | CD84    | p.Q139fs        | FALSE | FALSE | FALSE | FALSE |
| pLOF      | 1 | 1.68E+08 | C   | A | lof  | GPR161  | p.E527X         | FALSE | FALSE | FALSE | FALSE |
| pLOF      | 1 | 1.7E+08  | TG  | T | lof  | SELL    | p.P216fs        | FALSE | FALSE | FALSE | FALSE |
| pLOF      | 1 | 1.7E+08  | C   | A | lof  | SELE    | NA              | FALSE | FALSE | FALSE | FALSE |
| pLOF      | 1 | 1.72E+08 | AG  | A | lof  | METTL13 | p.R49fs         | FALSE | TRUE  | FALSE | FALSE |
| dDNV      | 1 | 1.72E+08 | C   | G | misD | DNM3    | p.P747A         | FALSE | FALSE | FALSE | FALSE |
| dDNV      | 1 | 1.77E+08 | A   | C | misD | PAPP A2 | p.N1746T        | FALSE | FALSE | FALSE | FALSE |
| dDNV      | 1 | 1.79E+08 | G   | T | misD | ABL2    | p.S394Y         | FALSE | FALSE | FALSE | FALSE |
| pLOF      | 1 | 1.79E+08 | TC  | T | lof  | AXDN D1 | p.P94fs         | FALSE | FALSE | FALSE | FALSE |
| pLOF      | 1 | 1.8E+08  | GC  | G | lof  | CEP350  | p.Ala1896fs     | FALSE | FALSE | FALSE | TRUE  |
| pLOF      | 1 | 1.84E+08 | TG  | T | lof  | NCF2    | p.H302fs        | FALSE | FALSE | FALSE | FALSE |
| pLOF      | 1 | 1.84E+08 | C   | T | lof  | RGL1    | p.Q519X         | FALSE | FALSE | FALSE | TRUE  |
| pLOF      | 1 | 1.97E+08 | C   | A | lof  | CFHR4   | p.C73X          | FALSE | FALSE | FALSE | FALSE |
| pLOF      | 1 | 2.01E+08 | A   | T | lof  | CACNA1S | p.C1338X        | FALSE | FALSE | FALSE | FALSE |
| pLOF      | 1 | 2.01E+08 | C   | T | lof  | CACNA1S | p.W417X         | FALSE | FALSE | FALSE | FALSE |
| pLOF      | 1 | 2.01E+08 | C   | T | lof  | IGFN1   | p.Q404X         | FALSE | FALSE | FALSE | FALSE |

|               |   |          |           |    |      |              |                |           |           |           |           |
|---------------|---|----------|-----------|----|------|--------------|----------------|-----------|-----------|-----------|-----------|
| pLOF          | 1 | 2.01E+08 | AC        | A  | lof  | LAD1         | .              | FALS<br>E | FALS<br>E | FALS<br>E | FALS<br>E |
| pLOF          | 1 | 2.03E+08 | C         | T  | lof  | PPP1<br>R12B | p.R20<br>7X    | FALS<br>E | FALS<br>E | FALS<br>E | FALS<br>E |
| dDNV          | 1 | 2.03E+08 | G         | A  | misD | MYO<br>G     | p.T18<br>9M    | FALS<br>E | FALS<br>E | FALS<br>E | TRUE      |
| pLOF          | 1 | 2.03E+08 | AG        | A  | lof  | ADO<br>RA1   | p.Val<br>174fs | FALS<br>E | FALS<br>E | FALS<br>E | FALS<br>E |
| pLOF          | 1 | 2.03E+08 | T         | C  | lof  | MYB<br>PH    | .              | FALS<br>E | FALS<br>E | FALS<br>E | FALS<br>E |
| dDNV          | 1 | 2.04E+08 | G         | T  | misD | ATP2<br>B4   | p.D62<br>1Y    | FALS<br>E | FALS<br>E | FALS<br>E | FALS<br>E |
| pLOF          | 1 | 2.04E+08 | C         | T  | lof  | PIK3<br>C2B  | p.W2<br>56X    | FALS<br>E | FALS<br>E | FALS<br>E | TRUE      |
| pLOF          | 1 | 2.06E+08 | A         | AC | lof  | PM20<br>D1   | p.S20<br>7fs   | FALS<br>E | FALS<br>E | FALS<br>E | FALS<br>E |
| dDNV          | 1 | 2.08E+08 | G         | A  | misD | CR2          | p.C15<br>4Y    | FALS<br>E | FALS<br>E | FALS<br>E | FALS<br>E |
| pLOF          | 1 | 2.08E+08 | A         | G  | lof  | CR2          | NA             | FALS<br>E | FALS<br>E | FALS<br>E | FALS<br>E |
| pLOF          | 1 | 2.1E+08  | T         | TA | lof  | LAMB<br>3    | p.Y27<br>fs    | FALS<br>E | FALS<br>E | FALS<br>E | FALS<br>E |
| pLOF          | 1 | 2.12E+08 | AG        | A  | lof  | TRAF<br>5    | p.G9f<br>s     | FALS<br>E | FALS<br>E | FALS<br>E | FALS<br>E |
| pLOF          | 1 | 2.16E+08 | AG        | A  | lof  | USH2<br>A    | p.L35<br>67X   | FALS<br>E | FALS<br>E | FALS<br>E | FALS<br>E |
| pLOF          | 1 | 2.16E+08 | CT        | C  | lof  | USH2<br>A    | p.P11<br>45fs  | FALS<br>E | FALS<br>E | FALS<br>E | FALS<br>E |
| pLOF          | 1 | 2.23E+08 | CCCT<br>T | C  | lof  | HHIP<br>L2   | p.E46<br>8fs   | FALS<br>E | FALS<br>E | FALS<br>E | FALS<br>E |
| pLOF          | 1 | 2.23E+08 | G         | T  | lof  | FAM1<br>77B  | .              | FALS<br>E | FALS<br>E | FALS<br>E | FALS<br>E |
| dDNV          | 1 | 2.23E+08 | G         | A  | misD | DISP<br>1    | p.R63<br>1Q    | FALS<br>E | FALS<br>E | FALS<br>E | FALS<br>E |
| pLOF          | 1 | 2.25E+08 | TA        | T  | lof  | DNA<br>H14   | p.L18<br>05fs  | FALS<br>E | FALS<br>E | FALS<br>E | FALS<br>E |
| dDNV<br>/pLOF | 1 | 2.25E+08 | G         | A  | lof  | DNA<br>H14   | p.Trp<br>1808* | FALS<br>E | FALS<br>E | FALS<br>E | FALS<br>E |
| pLOF          | 1 | 2.26E+08 | C         | T  | lof  | EPHX<br>1    | p.R33<br>8X    | FALS<br>E | FALS<br>E | FALS<br>E | FALS<br>E |
| pLOF          | 1 | 2.27E+08 | G         | T  | lof  | ADCK<br>3    | p.E63<br>4X    | FALS<br>E | FALS<br>E | FALS<br>E | FALS<br>E |
| pLOF          | 1 | 2.28E+08 | C         | A  | lof  | C1orf<br>35  | .              | FALS<br>E | FALS<br>E | FALS<br>E | FALS<br>E |
| pLOF          | 1 | 2.28E+08 | TCA       | T  | lof  | OBS<br>CN    | p.V32<br>51fs  | FALS<br>E | FALS<br>E | FALS<br>E | FALS<br>E |
| pLOF          | 1 | 2.3E+08  | T         | C  | lof  | URB2         | NA             | FALS<br>E | FALS<br>E | FALS<br>E | FALS<br>E |
| dDNV          | 1 | 2.31E+08 | T         | C  | misD | GNP<br>AT    | p.I262<br>T    | FALS<br>E | TRUE      | FALS<br>E | FALS<br>E |
| pLOF          | 1 | 2.32E+08 | G         | A  | lof  | DISC<br>1    | p.W6<br>70X    | FALS<br>E | FALS<br>E | TRUE      | FALS<br>E |
| pLOF          | 1 | 2.33E+08 | G         | GA | lof  | PCNX<br>L2   | p.F17<br>72fs  | FALS<br>E | FALS<br>E | FALS<br>E | FALS<br>E |



|            |   |           |                    |     |      |           |                |        |        |        |        |
|------------|---|-----------|--------------------|-----|------|-----------|----------------|--------|--------|--------|--------|
| pLOF       | 1 | 2.35E+08  | T                  | TAC | lof  | TARB P1   | p.T12 46fs     | FALS E | FALS E | FALS E | FALS E |
| dDNV       | 1 | 2.38E+08  | A                  | G   | misD | RYR2      | p.Met 4058 Val | FALS E | FALS E | FALS E | TRUE   |
| pLOF       | 1 | 2.38E+08  | G                  | A   | lof  | ZP4       | p.Q23 6X       | FALS E | FALS E | FALS E | FALS E |
| pLOF       | 1 | 2.42E+08  | G                  | A   | lof  | CHM L     | p.Gln 473*     | FALS E | FALS E | FALS E | FALS E |
| pLOF       | 1 | 2.49E+08  | C                  | CAA | lof  | ZNF6 72   | p.Arg 41fs     | FALS E | FALS E | FALS E | FALS E |
| dDNV /pLOF | 1 | 2.49E+08  | AGC GCC ACG CTG GT | A   | lof  | ZNF6 72   | p.S23 9fs      | FALS E | FALS E | FALS E | FALS E |
| pLOF       | 2 | 10199 057 | C                  | A   | lof  | CYS1      | p.E13 4X       | FALS E | FALS E | FALS E | FALS E |
| pLOF       | 2 | 11960 624 | AAG                | A   | lof  | LPIN1     | p.K91 8fs      | TRUE   | FALS E | FALS E | FALS E |
| pLOF       | 2 | 21232 182 | G                  | A   | lof  | APOB      | p.R25 20X      | FALS E | FALS E | FALS E | FALS E |
| pLOF       | 2 | 25964 922 | GCA                | G   | lof  | ASXL 2    | p.C14 28fs     | TRUE   | FALS E | TRUE   | TRUE   |
| pLOF       | 2 | 27293 033 | TC                 | T   | lof  | AGBL 5    | p.S85 5fs      | FALS E | FALS E | FALS E | FALS E |
| dDNV       | 2 | 27445 073 | C                  | T   | misD | CAD       | p.R12 2W       | FALS E | TRUE   | TRUE   | TRUE   |
| pLOF       | 2 | 27706 245 | T                  | TA  | lof  | IFT17 2   | .              | FALS E | TRUE   | FALS E | FALS E |
| pLOF       | 2 | 28812 887 | C                  | T   | lof  | PLB1      | p.Q67 8X       | FALS E | FALS E | FALS E | FALS E |
| pLOF       | 2 | 29287 883 | CA                 | C   | lof  | C2orf 71  | p.Cys 124ofs   | FALS E | FALS E | FALS E | FALS E |
| pLOF       | 2 | 29606 630 | AC                 | A   | lof  | ALK       | p.V41 7fs      | FALS E | FALS E | FALS E | FALS E |
| pLOF       | 2 | 30986 012 | G                  | GT  | lof  | CAPN 13   | p.T23 7fs      | FALS E | FALS E | FALS E | FALS E |
| pLOF       | 2 | 37032 808 | G                  | A   | lof  | VIT       | .              | FALS E | FALS E | FALS E | FALS E |
| pLOF       | 2 | 37321 291 | G                  | T   | lof  | GPAT CH11 | p.E22 5X       | FALS E | FALS E | FALS E | FALS E |
| pLOF       | 2 | 37543 642 | G                  | C   | lof  | PRKD 3    | p.S9X          | FALS E | TRUE   | FALS E | FALS E |
| dDNV /pLOF | 2 | 47136 161 | C                  | G   | lof  | MCF D2    | NA             | FALS E | TRUE   | FALS E | FALS E |
| pLOF       | 2 | 48915 301 | G                  | T   | lof  | LHCG R    | p.C54 5X       | FALS E | FALS E | FALS E | FALS E |
| pLOF       | 2 | 55253 349 | GCA CC             | G   | lof  | RTN4      | p.Gly 628fs    | FALS E | TRUE   | FALS E | FALS E |
| pLOF       | 2 | 55253 354 | A                  | AT  | lof  | RTN4      | p.Gly 628fs    | FALS E | TRUE   | FALS E | FALS E |

|               |   |              |           |           |      |             |                |           |           |           |           |
|---------------|---|--------------|-----------|-----------|------|-------------|----------------|-----------|-----------|-----------|-----------|
| pLOF          | 2 | 55872<br>531 | GT        | G         | lof  | PNPT<br>1   | p.T59<br>2fs   | FALS<br>E | TRUE      | FALS<br>E | FALS<br>E |
| pLOF          | 2 | 68740<br>211 | G         | A         | lof  | APLF        | .              | FALS<br>E | FALS<br>E | FALS<br>E | FALS<br>E |
| pLOF          | 2 | 70488<br>452 | G         | A         | lof  | PCY<br>OX1  | p.W1<br>43X    | FALS<br>E | TRUE      | FALS<br>E | FALS<br>E |
| pLOF          | 2 | 74652<br>826 | T         | C         | lof  | WDR<br>54   | p.X33<br>5R    | FALS<br>E | FALS<br>E | FALS<br>E | FALS<br>E |
| pLOF          | 2 | 74758<br>465 | G         | A         | lof  | HTRA<br>2   | .              | FALS<br>E | TRUE      | FALS<br>E | FALS<br>E |
| pLOF          | 2 | 75921<br>366 | C         | A         | lof  | GCF<br>C2   | .              | FALS<br>E | FALS<br>E | FALS<br>E | FALS<br>E |
| pLOF          | 2 | 88474<br>314 | TC        | T         | lof  | THNS<br>L2  | p.F12<br>7fs   | FALS<br>E | FALS<br>E | FALS<br>E | FALS<br>E |
| pLOF          | 2 | 88874<br>920 | G         | T         | lof  | EIF2A<br>K3 | p.S69<br>4X    | FALS<br>E | FALS<br>E | FALS<br>E | FALS<br>E |
| pLOF          | 2 | 1.03E<br>+08 | GA        | G         | lof  | IL1RL<br>1  | p.R62<br>fs    | FALS<br>E | FALS<br>E | FALS<br>E | FALS<br>E |
| pLOF          | 2 | 1.1E+<br>08  | A         | AG        | lof  | SH3R<br>F3  | p.G54<br>0fs   | FALS<br>E | FALS<br>E | FALS<br>E | FALS<br>E |
| dDNV          | 2 | 1.28E<br>+08 | C         | T         | misD | MYO<br>7B   | p.R20<br>03W   | FALS<br>E | FALS<br>E | FALS<br>E | FALS<br>E |
| pLOF          | 2 | 1.28E<br>+08 | AC        | A         | lof  | LIMS<br>2   | .              | FALS<br>E | FALS<br>E | FALS<br>E | FALS<br>E |
| pLOF          | 2 | 1.31E<br>+08 | GC        | G         | lof  | PTPN<br>18  | p.Pro<br>67fs  | FALS<br>E | FALS<br>E | FALS<br>E | FALS<br>E |
| pLOF          | 2 | 1.32E<br>+08 | AG        | A         | lof  | AME<br>R3   | p.G82<br>3fs   | FALS<br>E | FALS<br>E | FALS<br>E | TRUE      |
| dDNV          | 2 | 1.32E<br>+08 | C         | T         | misD | ARH<br>GEF4 | p.P42<br>3L    | FALS<br>E | FALS<br>E | FALS<br>E | FALS<br>E |
| pLOF          | 2 | 1.33E<br>+08 | G         | T         | lof  | GPR3<br>9   | p.Glu<br>416*  | FALS<br>E | FALS<br>E | FALS<br>E | FALS<br>E |
| dDNV<br>/pLOF | 2 | 1.36E<br>+08 | G         | A         | lof  | MAP3<br>K19 | p.R70<br>2X    | FALS<br>E | FALS<br>E | FALS<br>E | FALS<br>E |
| pLOF          | 2 | 1.36E<br>+08 | CAG       | C         | lof  | ZRAN<br>B3  | p.L58<br>6fs   | FALS<br>E | FALS<br>E | FALS<br>E | FALS<br>E |
| pLOF          | 2 | 1.38E<br>+08 | C         | T         | lof  | THSD<br>7B  | p.R72<br>3X    | FALS<br>E | FALS<br>E | FALS<br>E | FALS<br>E |
| pLOF          | 2 | 1.39E<br>+08 | A         | C         | lof  | HNM<br>T    | .              | FALS<br>E | FALS<br>E | FALS<br>E | FALS<br>E |
| dDNV          | 2 | 1.41E<br>+08 | C         | T         | misD | LRP1<br>B   | p.S36<br>62N   | FALS<br>E | FALS<br>E | FALS<br>E | FALS<br>E |
| pLOF          | 2 | 1.52E<br>+08 | G         | A         | lof  | NMI         | p.Q24<br>7X    | FALS<br>E | FALS<br>E | FALS<br>E | FALS<br>E |
| pLOF          | 2 | 1.52E<br>+08 | C         | CTTG<br>A | lof  | NEB         | p.E81<br>00fs  | FALS<br>E | FALS<br>E | FALS<br>E | FALS<br>E |
| pLOF          | 2 | 1.57E<br>+08 | AT        | A         | lof  | GPD2        | p.Ile7<br>03fs | FALS<br>E | FALS<br>E | FALS<br>E | FALS<br>E |
| pLOF          | 2 | 1.59E<br>+08 | C         | T         | lof  | ACVR<br>1   | p.W4<br>78X    | FALS<br>E | FALS<br>E | FALS<br>E | FALS<br>E |
| pLOF          | 2 | 1.61E<br>+08 | AAAT<br>T | A         | lof  | LY75        | p.Glu<br>773fs | FALS<br>E | FALS<br>E | FALS<br>E | FALS<br>E |
| pLOF          | 2 | 1.65E<br>+08 | T         | TAAA<br>G | lof  | GRB1<br>4   | .              | FALS<br>E | FALS<br>E | FALS<br>E | FALS<br>E |

|               |   |          |                  |                                 |      |         |                     |           |           |           |           |
|---------------|---|----------|------------------|---------------------------------|------|---------|---------------------|-----------|-----------|-----------|-----------|
| pLOF          | 2 | 1.71E+08 | A                | G                               | lof  | MYO3B   | .                   | FALS<br>E | FALS<br>E | FALS<br>E | FALS<br>E |
| pLOF          | 2 | 1.74E+08 | G                | GA                              | lof  | MLTK    | p.Arg<br>617fs      | FALS<br>E | FALS<br>E | FALS<br>E | FALS<br>E |
| pLOF          | 2 | 1.75E+08 | G                | A                               | lof  | GPR155  | p.R76<br>4X         | FALS<br>E | FALS<br>E | FALS<br>E | FALS<br>E |
| pLOF          | 2 | 1.79E+08 | G                | A                               | lof  | TTN     | p.R21<br>604X       | FALS<br>E | FALS<br>E | FALS<br>E | FALS<br>E |
| pLOF          | 2 | 1.89E+08 | G                | A                               | lof  | GULP1   | p.Trp<br>112*       | FALS<br>E | FALS<br>E | FALS<br>E | TRUE      |
| pLOF          | 2 | 2.02E+08 | C                | T                               | lof  | NIF3L1  | p.R24<br>1X         | FALS<br>E | TRUE      | FALS<br>E | FALS<br>E |
| pLOF          | 2 | 2.04E+08 | CAG              | C                               | lof  | ABI2    | p.S12<br>5fs        | FALS<br>E | TRUE      | FALS<br>E | FALS<br>E |
| pLOF          | 2 | 2.06E+08 | A                | G                               | lof  | PARD3B  | .                   | FALS<br>E | FALS<br>E | TRUE      | FALS<br>E |
| pLOF          | 2 | 2.07E+08 | AT               | A                               | lof  | NDUF51  | p.I225<br>fs        | FALS<br>E | TRUE      | FALS<br>E | FALS<br>E |
| pLOF          | 2 | 2.09E+08 | CA               | C                               | lof  | IDH1    | p.L35<br>2fs        | FALS<br>E | TRUE      | FALS<br>E | FALS<br>E |
| pLOF          | 2 | 2.19E+08 | C                | A                               | lof  | SLC11A1 | p.Y25<br>8X         | FALS<br>E | FALS<br>E | FALS<br>E | FALS<br>E |
| pLOF          | 2 | 2.19E+08 | AAGA<br>T        | A                               | lof  | VIL1    | p.K39<br>1fs        | FALS<br>E | FALS<br>E | TRUE      | FALS<br>E |
| pLOF          | 2 | 2.2E+08  | G                | A                               | lof  | CFAP65  | p.R92<br>2X         | FALS<br>E | FALS<br>E | FALS<br>E | FALS<br>E |
| pLOF          | 2 | 2.2E+08  | G                | A                               | lof  | CNPPD1  | p.R76<br>X          | FALS<br>E | FALS<br>E | FALS<br>E | FALS<br>E |
| pLOF          | 2 | 2.28E+08 | T                | G                               | lof  | COL4A3  | p.Y28<br>3X         | FALS<br>E | FALS<br>E | FALS<br>E | FALS<br>E |
| pLOF          | 2 | 2.28E+08 | G                | A                               | lof  | COL4A3  | .                   | FALS<br>E | FALS<br>E | FALS<br>E | FALS<br>E |
| pLOF          | 2 | 2.31E+08 | C                | A                               | lof  | SP110   | .                   | TRUE      | FALS<br>E | FALS<br>E | FALS<br>E |
| pLOF          | 2 | 2.32E+08 | G                | T                               | lof  | CAB39   | p.E34<br>0X         | FALS<br>E | TRUE      | FALS<br>E | FALS<br>E |
| dDNV          | 2 | 2.34E+08 | C                | T                               | misD | DGKD    | p.Arg<br>962C<br>ys | FALS<br>E | TRUE      | FALS<br>E | FALS<br>E |
| dDNV          | 2 | 2.35E+08 | T                | A                               | misD | UGT1A6  | p.L23<br>7H         | FALS<br>E | FALS<br>E | FALS<br>E | FALS<br>E |
| dDNV<br>/pLOF | 2 | 2.35E+08 | A                | AT                              | lof  | TRPM8   | p.Y23<br>5fs        | FALS<br>E | FALS<br>E | FALS<br>E | FALS<br>E |
| pLOF          | 2 | 2.38E+08 | ACG<br>CCA<br>GT | A                               | lof  | PRLH    | p.Y42<br>fs         | FALS<br>E | FALS<br>E | FALS<br>E | FALS<br>E |
| pLOF          | 2 | 2.39E+08 | G                | GC                              | lof  | FAM132B | p.Gly<br>124fs      | FALS<br>E | FALS<br>E | FALS<br>E | FALS<br>E |
| pLOF          | 2 | 2.41E+08 | C                | CGT<br>GGA<br>TGAA<br>GAG<br>CT | lof  | PRR21   | p.R12<br>fs         | FALS<br>E | FALS<br>E | FALS<br>E | FALS<br>E |

|           |   |          |       |    |      |          |              |       |       |       |       |
|-----------|---|----------|-------|----|------|----------|--------------|-------|-------|-------|-------|
| pLOF      | 2 | 2.42E+08 | AG    | A  | lof  | PASK     | p.Trp241fs   | FALSE | FALSE | FALSE | FALSE |
| pLOF      | 2 | 2.42E+08 | TTC   | T  | lof  | STK25    | p.E371fs     | FALSE | TRUE  | FALSE | FALSE |
| pLOF      | 3 | 9695344  | C     | T  | lof  | MTMR14   | p.R67X       | FALSE | TRUE  | FALSE | FALSE |
| pLOF      | 3 | 9877003  | GA    | G  | lof  | TTL3     | p.D860fs     | FALSE | FALSE | FALSE | FALSE |
| pLOF      | 3 | 9979296  | T     | TC | lof  | CRELD1   | p.Glu104fs   | FALSE | FALSE | FALSE | FALSE |
| pLOF      | 3 | 10254918 | GA    | G  | lof  | IRAK2    | p.E186fs     | FALSE | FALSE | FALSE | FALSE |
| pLOF      | 3 | 10320063 | T     | TG | lof  | TATDN2   | p.W688fs     | FALSE | FALSE | FALSE | FALSE |
| pLOF      | 3 | 12780071 | CA    | C  | lof  | TMEM40   | p.V124fs     | FALSE | FALSE | FALSE | FALSE |
| pLOF      | 3 | 14200140 | G     | A  | lof  | XPC      | p.R415X      | FALSE | FALSE | FALSE | FALSE |
| pLOF      | 3 | 14745975 | A     | AC | lof  | C3orf20  | p.Y337fs     | FALSE | FALSE | FALSE | FALSE |
| pLOF      | 3 | 20042879 | G     | A  | lof  | PP2D1    | p.Q245X      | FALSE | FALSE | FALSE | FALSE |
| dDNV      | 3 | 27333034 | G     | C  | misD | NEK10    | p.H473D      | FALSE | FALSE | FALSE | FALSE |
| dDNV/pLOF | 3 | 32611912 | C     | G  | lof  | DYNC1LI1 | NA           | FALSE | TRUE  | FALSE | TRUE  |
| pLOF      | 3 | 36879869 | CA    | C  | lof  | TRANK1   | p.L1793fs    | FALSE | FALSE | FALSE | FALSE |
| dDNV      | 3 | 38592918 | C     | G  | misD | SCN5A    | p.Ala1649Pro | FALSE | FALSE | FALSE | TRUE  |
| pLOF      | 3 | 38793799 | G     | A  | lof  | SCN10A   | p.Q556X      | FALSE | FALSE | FALSE | FALSE |
| pLOF      | 3 | 39374845 | C     | A  | lof  | CCR8     | p.C341X      | FALSE | FALSE | FALSE | FALSE |
| pLOF      | 3 | 43759162 | G     | A  | lof  | ABHD5    | .            | FALSE | FALSE | FALSE | FALSE |
| pLOF      | 3 | 48602273 | TC    | T  | lof  | COL7A1   | p.G2920fs    | FALSE | FALSE | FALSE | FALSE |
| pLOF      | 3 | 48716340 | C     | A  | lof  | NCK1PSD  | p.E581X      | FALSE | FALSE | FALSE | FALSE |
| pLOF      | 3 | 49053766 | AG    | A  | lof  | DALRD3   | p.Leu385fs   | FALSE | TRUE  | FALSE | FALSE |
| pLOF      | 3 | 49163457 | CAGAG | C  | lof  | LAMB2    | p.P761fs     | FALSE | TRUE  | FALSE | FALSE |
| pLOF      | 3 | 49850818 | T     | C  | lof  | UBA7     | .            | FALSE | TRUE  | FALSE | FALSE |
| pLOF      | 3 | 51990710 | A     | AC | lof  | GPR62    | p.T348fs     | FALSE | FALSE | FALSE | FALSE |
| pLOF      | 3 | 52430632 | A     | G  | lof  | DNAH1    | .            | FALSE | FALSE | FALSE | FALSE |
| pLOF      | 3 | 52512570 | C     | T  | lof  | NISCH    | p.Q427X      | FALSE | TRUE  | FALSE | TRUE  |

|               |   |              |     |     |     |              |                              |           |           |           |           |
|---------------|---|--------------|-----|-----|-----|--------------|------------------------------|-----------|-----------|-----------|-----------|
| pLOF          | 3 | 52512<br>570 | C   | T   | lof | NISC<br>H    | p.Gln<br>427*                | FALS<br>E | TRUE      | FALS<br>E | TRUE      |
| pLOF          | 3 | 52825<br>797 | G   | A   | lof | ITIH1        | NA                           | FALS<br>E | FALS<br>E | FALS<br>E | FALS<br>E |
| pLOF          | 3 | 56114<br>964 | T   | A   | lof | ERC2         | p.K50<br>8X                  | FALS<br>E | FALS<br>E | FALS<br>E | TRUE      |
| pLOF          | 3 | 57303<br>701 | G   | T   | lof | APPL<br>1    | p.E70<br>6X                  | FALS<br>E | FALS<br>E | FALS<br>E | TRUE      |
| dDNV<br>/pLOF | 3 | 69082<br>783 | G   | A   | lof | TMF1         | p.R77<br>3X                  | FALS<br>E | FALS<br>E | FALS<br>E | FALS<br>E |
| pLOF          | 3 | 73523<br>667 | AT  | A   | lof | PDZR<br>N3   | p.Met<br>8fs                 | FALS<br>E | TRUE      | FALS<br>E | TRUE      |
| pLOF          | 3 | 97668<br>731 | G   | GA  | lof | MINA         | p.L33<br>9fs                 | FALS<br>E | FALS<br>E | FALS<br>E | FALS<br>E |
| pLOF          | 3 | 1.02E<br>+08 | C   | T   | lof | ZPLD<br>1    | p.R28<br>4X                  | FALS<br>E | FALS<br>E | FALS<br>E | FALS<br>E |
| pLOF          | 3 | 1.08E<br>+08 | G   | A   | lof | MYH1<br>5    | p.R18<br>7X                  | FALS<br>E | FALS<br>E | FALS<br>E | FALS<br>E |
| pLOF          | 3 | 1.08E<br>+08 | TG  | T   | lof | KIAA<br>1524 | p.Asn<br>553fs               | FALS<br>E | TRUE      | FALS<br>E | FALS<br>E |
| pLOF          | 3 | 1.12E<br>+08 | C   | T   | lof | TMP<br>RSS7  | p.R14<br>X                   | FALS<br>E | FALS<br>E | FALS<br>E | FALS<br>E |
| pLOF          | 3 | 1.13E<br>+08 | CTT | C   | lof | GTPB<br>P8   | p.Phe<br>14fs                | FALS<br>E | FALS<br>E | FALS<br>E | FALS<br>E |
| pLOF          | 3 | 1.21E<br>+08 | G   | A   | lof | POLQ         | p.Q23<br>50X                 | FALS<br>E | FALS<br>E | FALS<br>E | FALS<br>E |
| pLOF          | 3 | 1.21E<br>+08 | CA  | C   | lof | GOL<br>GB1   | p.M22<br>47fs                | FALS<br>E | FALS<br>E | FALS<br>E | FALS<br>E |
| pLOF          | 3 | 1.25E<br>+08 | G   | GTC | lof | HEG1         | p.Ser<br>7fs                 | FALS<br>E | FALS<br>E | FALS<br>E | FALS<br>E |
| pLOF          | 3 | 1.26E<br>+08 | T   | TA  | lof | TXNR<br>D3NB | p.K66<br>_R67<br>delins<br>X | FALS<br>E | FALS<br>E | FALS<br>E | FALS<br>E |
| pLOF          | 3 | 1.27E<br>+08 | TA  | T   | lof | TPRA<br>1    | p.V30<br>6fs                 | FALS<br>E | FALS<br>E | FALS<br>E | FALS<br>E |
| pLOF          | 3 | 1.31E<br>+08 | C   | A   | lof | NEK1<br>1    | p.Tyr<br>29*                 | TRUE      | FALS<br>E | FALS<br>E | FALS<br>E |
| pLOF          | 3 | 1.31E<br>+08 | AC  | A   | lof | NEK1<br>1    | p.Y47<br>9X                  | TRUE      | FALS<br>E | FALS<br>E | FALS<br>E |
| pLOF          | 3 | 1.38E<br>+08 | G   | A   | lof | NME9         | p.R14<br>2X                  | FALS<br>E | FALS<br>E | FALS<br>E | FALS<br>E |
| dDNV<br>/pLOF | 3 | 1.39E<br>+08 | G   | C   | lof | COP<br>B2    | p.S28<br>3X                  | FALS<br>E | TRUE      | FALS<br>E | TRUE      |
| pLOF          | 3 | 1.49E<br>+08 | GA  | G   | lof | CPA3         | p.N21<br>1fs                 | FALS<br>E | FALS<br>E | FALS<br>E | FALS<br>E |
| pLOF          | 3 | 1.49E<br>+08 | G   | A   | lof | CPA3         | .                            | FALS<br>E | FALS<br>E | FALS<br>E | FALS<br>E |
| pLOF          | 3 | 1.49E<br>+08 | C   | A   | lof | HPS3         | p.Y56<br>2X                  | FALS<br>E | FALS<br>E | FALS<br>E | FALS<br>E |
| pLOF          | 3 | 1.51E<br>+08 | A   | G   | lof | GPR8<br>7    | p.X35<br>9Q                  | FALS<br>E | FALS<br>E | FALS<br>E | FALS<br>E |

|      |   |          |         |             |      |          |           |       |       |       |       |
|------|---|----------|---------|-------------|------|----------|-----------|-------|-------|-------|-------|
| pLOF | 3 | 1.51E+08 | G       | GT          | lof  | P2RY13   | p.N249fs  | FALSE | FALSE | FALSE | FALSE |
| pLOF | 3 | 1.54E+08 | C       | CT          | lof  | GPR149   | .         | FALSE | FALSE | FALSE | FALSE |
| pLOF | 3 | 1.55E+08 | C       | CT          | lof  | PLCH1    | p.S1318fs | FALSE | FALSE | FALSE | FALSE |
| pLOF | 3 | 1.59E+08 | T       | TGGGCGTGGCC | lof  | MFS D1   | p.M1fs    | FALSE | TRUE  | FALSE | FALSE |
| pLOF | 3 | 1.6E+08  | TAAA GA | T           | lof  | SMC4     | p.K397fs  | FALSE | TRUE  | FALSE | FALSE |
| pLOF | 3 | 1.6E+08  | G       | GGTGT       | lof  | SMC4     | p.Q801fs  | FALSE | TRUE  | FALSE | FALSE |
| pLOF | 3 | 1.6E+08  | TC      | T           | lof  | ARL14    | p.I42fs   | FALSE | FALSE | FALSE | FALSE |
| dDNV | 3 | 1.65E+08 | G       | A           | misD | SI       | p.P475S   | FALSE | FALSE | FALSE | FALSE |
| pLOF | 3 | 1.66E+08 | AT      | A           | lof  | BCHE     | p.N209fs  | FALSE | FALSE | FALSE | FALSE |
| pLOF | 3 | 1.72E+08 | CA      | C           | lof  | GHSR     | p.W215fs  | FALSE | FALSE | FALSE | FALSE |
| pLOF | 3 | 1.79E+08 | GCA GTA | G           | lof  | ZMAT3    | p.Y71fs   | FALSE | TRUE  | FALSE | FALSE |
| pLOF | 3 | 1.83E+08 | TC      | T           | lof  | MCF2L2   | p.G187fs  | FALSE | FALSE | FALSE | FALSE |
| pLOF | 3 | 1.84E+08 | C       | A           | lof  | ECE2     | p.S230X   | FALSE | FALSE | FALSE | FALSE |
| pLOF | 3 | 1.85E+08 | A       | G           | lof  | VPS8     | p.Met1?   | FALSE | FALSE | FALSE | FALSE |
| pLOF | 3 | 1.9E+08  | C       | T           | lof  | TME M207 | .         | FALSE | FALSE | FALSE | FALSE |
| pLOF | 3 | 1.93E+08 | TC      | T           | lof  | ATP13A5  | p.E107fs  | FALSE | FALSE | FALSE | FALSE |
| pLOF | 3 | 1.97E+08 | C       | T           | lof  | SENP5    | p.Q269X   | FALSE | FALSE | FALSE | TRUE  |
| pLOF | 3 | 1.98E+08 | C       | T           | lof  | IQCG     | p.W330X   | FALSE | FALSE | FALSE | FALSE |
| pLOF | 4 | 657557   | A       | G           | lof  | PDE6B    | .         | FALSE | FALSE | FALSE | FALSE |
| pLOF | 4 | 995352   | G       | A           | lof  | IDUA     | .         | FALSE | FALSE | FALSE | FALSE |
| pLOF | 4 | 1165675  | AG      | A           | lof  | SPO N2   | p.L62fs   | FALSE | FALSE | FALSE | FALSE |
| pLOF | 4 | 2210193  | G       | A           | lof  | POLN     | p.Q79X    | FALSE | FALSE | FALSE | FALSE |
| pLOF | 4 | 9909936  | CT      | C           | lof  | SLC2A9   | p.K316fs  | FALSE | FALSE | FALSE | FALSE |
| pLOF | 4 | 22390565 | C       | T           | lof  | ADG RA3  | p.W910X   | FALSE | FALSE | FALSE | FALSE |
| pLOF | 4 | 25270817 | A       | AG          | lof  | PI4K2B   | p.R422fs  | FALSE | FALSE | FALSE | FALSE |
| pLOF | 4 | 38117333 | C       | T           | lof  | TBC1D1   | p.R948X   | FALSE | TRUE  | FALSE | FALSE |

|           |   |          |                                    |        |      |           |            |       |       |       |       |
|-----------|---|----------|------------------------------------|--------|------|-----------|------------|-------|-------|-------|-------|
| pLOF      | 4 | 42965062 | G                                  | T      | lof  | GRXCR1    | p.Glu180*  | FALSE | FALSE | FALSE | FALSE |
| pLOF      | 4 | 48501484 | TAG                                | T      | lof  | FRYL      | p.L2999fs  | FALSE | FALSE | FALSE | TRUE  |
| dDNV/pLOF | 4 | 48584641 | TAAAC                              | T      | lof  | FRYL      | p.V619fs   | FALSE | FALSE | FALSE | TRUE  |
| pLOF      | 4 | 57181627 | G                                  | GCT    | lof  | KIAA1211  | p.K653fs   | FALSE | TRUE  | FALSE | FALSE |
| pLOF      | 4 | 68930574 | G                                  | GA     | lof  | TMPRSS11F | p.H282fs   | FALSE | FALSE | FALSE | FALSE |
| pLOF      | 4 | 72316150 | G                                  | GTCTTT | lof  | SLC4A4    | p.L366fs   | FALSE | FALSE | FALSE | TRUE  |
| pLOF      | 4 | 76532365 | A                                  | C      | lof  | CDKL2     | .          | FALSE | FALSE | FALSE | FALSE |
| pLOF      | 4 | 76956270 | ATAC TGT                           | A      | lof  | CXCL11    | p.I63fs    | FALSE | FALSE | FALSE | FALSE |
| pLOF      | 4 | 78080585 | CTT                                | C      | lof  | CCN2      | p.Phe70fs  | FALSE | TRUE  | FALSE | FALSE |
| dDNV/pLOF | 4 | 79186194 | C                                  | T      | lof  | FRAS1     | p.Arg207*  | FALSE | FALSE | FALSE | FALSE |
| pLOF      | 4 | 87671811 | C                                  | T      | lof  | PTPN13    | p.Q947X    | FALSE | TRUE  | FALSE | FALSE |
| pLOF      | 4 | 87720325 | TAGAG                              | T      | lof  | PTPN13    | p.I2163fs  | FALSE | TRUE  | FALSE | FALSE |
| pLOF      | 4 | 90857226 | GTT                                | G      | lof  | MMRN1     | p.V799fs   | FALSE | FALSE | FALSE | FALSE |
| pLOF      | 4 | 90857627 | C                                  | CA     | lof  | MMRN1     | p.Asn933fs | FALSE | FALSE | FALSE | FALSE |
| pLOF      | 4 | 1E+08    | A                                  | G      | lof  | C4orf17   | p.X360W    | FALSE | FALSE | FALSE | FALSE |
| pLOF      | 4 | 1.07E+08 | G                                  | GAA    | lof  | TBCK      | p.F101fs   | FALSE | FALSE | TRUE  | FALSE |
| pLOF      | 4 | 1.09E+08 | C                                  | A      | lof  | PAPS1     | p.E236X    | FALSE | TRUE  | FALSE | FALSE |
| pLOF      | 4 | 1.11E+08 | GTCT<br>CAAA<br>GTGT<br>AGG<br>TGA | G      | lof  | LRIT3     | p.S636fs   | FALSE | FALSE | FALSE | FALSE |
| pLOF      | 4 | 1.14E+08 | C                                  | T      | lof  | ZGRF1     | p.W1387X   | FALSE | FALSE | FALSE | FALSE |
| pLOF      | 4 | 1.23E+08 | G                                  | A      | lof  | KIAA1109  | .          | FALSE | FALSE | FALSE | FALSE |
| pLOF      | 4 | 1.35E+08 | C                                  | A      | lof  | PABPC4L   | p.E365X    | FALSE | FALSE | FALSE | FALSE |
| dDNV      | 4 | 1.46E+08 | G                                  | A      | misD | ABCE1     | p.R22Q     | FALSE | TRUE  | FALSE | TRUE  |
| pLOF      | 4 | 1.49E+08 | CTA                                | C      | lof  | ARHGAP10  | p.Y290fs   | FALSE | FALSE | FALSE | FALSE |
| pLOF      | 4 | 1.52E+08 | A                                  | C      | lof  | PRSS48    | p.X329S    | FALSE | FALSE | FALSE | FALSE |

|      |   |          |                   |                         |     |          |            |           |           |           |           |
|------|---|----------|-------------------|-------------------------|-----|----------|------------|-----------|-----------|-----------|-----------|
| pLOF | 4 | 1.56E+08 | G                 | GT                      | lof | MAP9     | p.T94fs    | FALS<br>E | FALS<br>E | FALS<br>E | FALS<br>E |
| pLOF | 4 | 1.57E+08 | C                 | T                       | lof | GUCY1A3  | p.R614X    | FALS<br>E | FALS<br>E | FALS<br>E | FALS<br>E |
| pLOF | 4 | 1.7E+08  | AG                | A                       | lof | SH3RF1   | p.P329fs   | FALS<br>E | FALS<br>E | FALS<br>E | FALS<br>E |
| pLOF | 5 | 7870882  | G                 | A                       | lof | MTRR     | .          | FALS<br>E | FALS<br>E | FALS<br>E | FALS<br>E |
| pLOF | 5 | 1372167  | GA                | G                       | lof | DNAH5    | p.S4074fs  | FALS<br>E | FALS<br>E | FALS<br>E | FALS<br>E |
| pLOF | 5 | 14711397 | G                 | T                       | lof | ANKH     | p.S463X    | FALS<br>E | FALS<br>E | TRUE      | FALS<br>E |
| pLOF | 5 | 16699557 | A                 | G                       | lof | MYO10    | .          | FALS<br>E | TRUE      | FALS<br>E | FALS<br>E |
| pLOF | 5 | 35910098 | GT                | G                       | lof | CAPSL    | p.T132fs   | FALS<br>E | FALS<br>E | FALS<br>E | FALS<br>E |
| pLOF | 5 | 38511915 | C                 | T                       | lof | LIFR     | p.W238X    | FALS<br>E | FALS<br>E | FALS<br>E | FALS<br>E |
| pLOF | 5 | 39383375 | T                 | A                       | lof | DAB2     | .          | FALS<br>E | FALS<br>E | FALS<br>E | FALS<br>E |
| pLOF | 5 | 52365994 | CA                | C                       | lof | ITGA2    | p.Arg714fs | FALS<br>E | FALS<br>E | FALS<br>E | FALS<br>E |
| pLOF | 5 | 54529089 | T                 | TGG<br>GCC<br>GGG<br>CC | lof | CCNO     | p.Q88fs    | FALS<br>E | FALS<br>E | FALS<br>E | FALS<br>E |
| pLOF | 5 | 54618194 | TAAT<br>GGA<br>AA | T                       | lof | SKIV2L2  | p.Asn59fs  | FALS<br>E | TRUE      | FALS<br>E | TRUE      |
| pLOF | 5 | 63496764 | A                 | AT                      | lof | RNF180   | p.I44fs    | FALS<br>E | FALS<br>E | FALS<br>E | FALS<br>E |
| pLOF | 5 | 64020297 | CT                | C                       | lof | SREK1IP1 | p.K127fs   | FALS<br>E | TRUE      | FALS<br>E | FALS<br>E |
| pLOF | 5 | 64625312 | T                 | C                       | lof | ADAMTS6  | .          | FALS<br>E | FALS<br>E | FALS<br>E | TRUE      |
| pLOF | 5 | 65054518 | C                 | T                       | lof | NLN      | p.Gln56*   | FALS<br>E | FALS<br>E | FALS<br>E | FALS<br>E |
| pLOF | 5 | 79029202 | GA                | G                       | lof | CMYA5    | p.K1539fs  | FALS<br>E | FALS<br>E | FALS<br>E | FALS<br>E |
| pLOF | 5 | 94731814 | G                 | A                       | lof | FAM81B   | .          | FALS<br>E | FALS<br>E | FALS<br>E | FALS<br>E |
| pLOF | 5 | 96430453 | T                 | A                       | lof | LIX1     | p.X283L    | FALS<br>E | FALS<br>E | FALS<br>E | FALS<br>E |
| pLOF | 5 | 1.02E+08 | TG                | T                       | lof | SLCO4C1  | p.T449fs   | FALS<br>E | FALS<br>E | FALS<br>E | FALS<br>E |
| pLOF | 5 | 1.03E+08 | T                 | TA                      | lof | C5orf30  | p.Arg92fs  | FALS<br>E | FALS<br>E | FALS<br>E | FALS<br>E |
| pLOF | 5 | 1.1E+08  | C                 | A                       | lof | TME232   | p.E115X    | FALS<br>E | FALS<br>E | FALS<br>E | FALS<br>E |
| pLOF | 5 | 1.11E+08 | C                 | T                       | lof | STAR4D   | .          | FALS<br>E | FALS<br>E | FALS<br>E | FALS<br>E |
| pLOF | 5 | 1.12E+08 | C                 | T                       | lof | REEP5    | .          | FALS<br>E | FALS<br>E | FALS<br>E | FALS<br>E |
| pLOF | 5 | 1.12E+08 | G                 | A                       | lof | MCC      | p.Q810X    | FALS<br>E | FALS<br>E | FALS<br>E | FALS<br>E |



|      |   |          |     |    |      |          |              |        |        |        |        |
|------|---|----------|-----|----|------|----------|--------------|--------|--------|--------|--------|
| pLOF | 5 | 1.15E+08 | G   | A  | lof  | LVRN     | p.W544X      | FALS E | FALS E | FALS E | FALS E |
| pLOF | 5 | 1.26E+08 | GC  | G  | lof  | ALDH7A1  | p.A462fs     | FALS E | TRUE   | FALS E | FALS E |
| pLOF | 5 | 1.39E+08 | G   | A  | lof  | SLC23A1  | p.R293X      | FALS E | FALS E | FALS E | FALS E |
| pLOF | 5 | 1.4E+08  | G   | T  | lof  | ANKHD1   | p.E564X      | FALS E | TRUE   | FALS E | TRUE   |
| pLOF | 5 | 1.4E+08  | C   | T  | lof  | TMC06    | p.Gln252*    | FALS E | FALS E | FALS E | FALS E |
| dDNV | 5 | 1.4E+08  | C   | T  | misD | PCDHA3   | p.A266V      | FALS E | FALS E | FALS E | FALS E |
| pLOF | 5 | 1.41E+08 | C   | G  | lof  | PCDHGB7  | p.Y401X      | FALS E | FALS E | FALS E | FALS E |
| pLOF | 5 | 1.45E+08 | T   | TC | lof  | PLAC8L1  | p.Glu155fs   | FALS E | FALS E | FALS E | FALS E |
| pLOF | 5 | 1.47E+08 | T   | A  | lof  | STK32A   | p.Tyr223*    | FALS E | FALS E | FALS E | FALS E |
| dDNV | 5 | 1.5E+08  | G   | T  | misD | ARSI     | p.S217R      | FALS E | FALS E | FALS E | FALS E |
| pLOF | 5 | 1.5E+08  | G   | GC | lof  | MYOZ3    | p.A123fs     | FALS E | FALS E | FALS E | FALS E |
| dDNV | 5 | 1.68E+08 | C   | T  | misD | SLIT3    | p.Glu1162Lys | FALS E | FALS E | FALS E | TRUE   |
| pLOF | 5 | 1.76E+08 | G   | T  | lof  | GPRI N1  | p.S40X       | FALS E | FALS E | FALS E | TRUE   |
| pLOF | 5 | 1.77E+08 | G   | T  | lof  | FGFR4    | p.G705X      | FALS E | FALS E | FALS E | FALS E |
| pLOF | 5 | 1.77E+08 | C   | A  | lof  | DBN1     | p.Met1?      | FALS E | TRUE   | FALS E | TRUE   |
| pLOF | 5 | 1.77E+08 | CCT | C  | lof  | B4GALT7  | p.Tyr194fs   | FALS E | FALS E | FALS E | FALS E |
| dDNV | 5 | 1.8E+08  | C   | T  | misD | FLT4     | p.Gly781A sp | FALS E | FALS E | FALS E | TRUE   |
| pLOF | 5 | 1.8E+08  | T   | A  | lof  | ZFP62    | p.Lys831*    | FALS E | TRUE   | FALS E | TRUE   |
| pLOF | 5 | 1.8E+08  | TCC | T  | lof  | BTNL3    | p.I208fs     | FALS E | FALS E | FALS E | FALS E |
| pLOF | 5 | 1.8E+08  | G   | A  | lof  | BTNL9    | NA           | FALS E | FALS E | FALS E | FALS E |
| pLOF | 6 | 4047423  | A   | T  | lof  | PRPF4B   | p.K626X      | FALS E | TRUE   | FALS E | TRUE   |
| pLOF | 6 | 5431312  | AC  | A  | lof  | FARS2    | p.T271fs     | FALS E | FALS E | FALS E | FALS E |
| pLOF | 6 | 13616731 | T   | TG | lof  | NOL7     | p.Leu122fs   | FALS E | TRUE   | FALS E | FALS E |
| pLOF | 6 | 24415304 | TC  | T  | lof  | MRS2     | p.I214fs     | FALS E | FALS E | FALS E | FALS E |
| pLOF | 6 | 24570129 | A   | T  | lof  | KIAA0319 | .            | FALS E | FALS E | FALS E | FALS E |
| pLOF | 6 | 26056362 | T   | TG | lof  | HIST1H1C | p.Thr99fs    | FALS E | FALS E | FALS E | FALS E |

|               |   |              |                            |     |      |             |                     |           |           |           |           |
|---------------|---|--------------|----------------------------|-----|------|-------------|---------------------|-----------|-----------|-----------|-----------|
| pLOF          | 6 | 28331<br>535 | C                          | T   | lof  | ZKSC<br>AN3 | p.Q23<br>4X         | FALS<br>E | FALS<br>E | FALS<br>E | FALS<br>E |
| dDNV<br>/pLOF | 6 | 32007<br>337 | GC                         | G   | lof  | CYP2<br>1A2 | 0                   | FALS<br>E | FALS<br>E | FALS<br>E | FALS<br>E |
| pLOF          | 6 | 32064<br>726 | TG                         | T   | lof  | TNXB        | p.Y30<br>1X         | FALS<br>E | FALS<br>E | FALS<br>E | FALS<br>E |
| pLOF          | 6 | 38885<br>167 | G                          | A   | lof  | DNA<br>H8   | p.Trp<br>3419*      | FALS<br>E | FALS<br>E | FALS<br>E | FALS<br>E |
| pLOF          | 6 | 38885<br>727 | G                          | A   | lof  | DNA<br>H8   | p.Trp<br>3433*      | FALS<br>E | FALS<br>E | FALS<br>E | FALS<br>E |
| pLOF          | 6 | 39387<br>746 | TA                         | T   | lof  | KIF6        | p.I596<br>fs        | FALS<br>E | FALS<br>E | FALS<br>E | FALS<br>E |
| pLOF          | 6 | 40400<br>345 | G                          | A   | lof  | LRFN<br>2   | p.R17<br>0X         | FALS<br>E | FALS<br>E | FALS<br>E | FALS<br>E |
| pLOF          | 6 | 41117<br>598 | AAAG<br>GCA<br>ATTC<br>AGC | A   | lof  | TRE<br>ML1  | p.Ala<br>223fs      | FALS<br>E | FALS<br>E | FALS<br>E | FALS<br>E |
| dDNV<br>/pLOF | 6 | 41884<br>521 | A                          | G   | lof  | MED2<br>0   | NA                  | FALS<br>E | TRUE      | FALS<br>E | FALS<br>E |
| pLOF          | 6 | 42928<br>596 | TG                         | T   | lof  | GNM<br>T    | p.W3<br>1fs         | FALS<br>E | FALS<br>E | FALS<br>E | FALS<br>E |
| pLOF          | 6 | 43010<br>706 | G                          | GTT | lof  | CUL7        | p.T11<br>60fs       | FALS<br>E | TRUE      | TRUE      | FALS<br>E |
| dDNV<br>/pLOF | 6 | 44328<br>227 | AT                         | A   | lof  | SPAT<br>S1  | NA                  | FALS<br>E | FALS<br>E | FALS<br>E | FALS<br>E |
| pLOF          | 6 | 44328<br>227 | AT                         | A   | lof  | SPAT<br>S1  | p.His<br>112fs      | FALS<br>E | FALS<br>E | FALS<br>E | FALS<br>E |
| pLOF          | 6 | 46607<br>355 | TA                         | T   | lof  | CYP3<br>9A1 | p.Met<br>122fs      | FALS<br>E | FALS<br>E | FALS<br>E | FALS<br>E |
| pLOF          | 6 | 50011<br>381 | G                          | T   | lof  | DEFB<br>112 | p.C83<br>X          | FALS<br>E | FALS<br>E | FALS<br>E | FALS<br>E |
| pLOF          | 6 | 51586<br>784 | C                          | G   | lof  | PKHD<br>1   | p.X33<br>97Y        | FALS<br>E | FALS<br>E | FALS<br>E | FALS<br>E |
| pLOF          | 6 | 55192<br>375 | G                          | A   | lof  | GFRA<br>L   | .                   | FALS<br>E | FALS<br>E | FALS<br>E | FALS<br>E |
| pLOF          | 6 | 74492<br>480 | T                          | C   | lof  | CD10<br>9   | .                   | FALS<br>E | FALS<br>E | FALS<br>E | FALS<br>E |
| dDNV<br>/pLOF | 6 | 85457<br>637 | C                          | T   | lof  | TBX1<br>8   | NA                  | FALS<br>E | FALS<br>E | TRUE      | TRUE      |
| pLOF          | 6 | 87994<br>477 | CA                         | C   | lof  | GJB7        | p.F51<br>fs         | FALS<br>E | FALS<br>E | FALS<br>E | FALS<br>E |
| pLOF          | 6 | 88315<br>682 | G                          | GC  | lof  | ORC3        | p.A12<br>4fs        | FALS<br>E | TRUE      | FALS<br>E | FALS<br>E |
| pLOF          | 6 | 90340<br>298 | C                          | T   | lof  | ANKR<br>D6  | p.Arg<br>587*       | FALS<br>E | TRUE      | FALS<br>E | FALS<br>E |
| dDNV          | 6 | 1.07E<br>+08 | G                          | A   | misD | PRD<br>M1   | p.C68<br>9Y         | FALS<br>E | FALS<br>E | FALS<br>E | TRUE      |
| pLOF          | 6 | 1.07E<br>+08 | CT                         | C   | lof  | AIM1        | p.Leu<br>1506f<br>s | FALS<br>E | FALS<br>E | FALS<br>E | FALS<br>E |

|      |   |          |       |    |      |         |             |           |           |           |           |
|------|---|----------|-------|----|------|---------|-------------|-----------|-----------|-----------|-----------|
| dDNV | 6 | 1.1E+08  | G     | A  | misD | FIG4    | p.G281D     | FALS<br>E | FALS<br>E | FALS<br>E | FALS<br>E |
| pLOF | 6 | 1.13E+08 | CA    | C  | lof  | RFPL4B  | p.Q82fs     | FALS<br>E | FALS<br>E | FALS<br>E | FALS<br>E |
| pLOF | 6 | 1.28E+08 | G     | GA | lof  | RSP03   | p.R220fs    | FALS<br>E | FALS<br>E | FALS<br>E | FALS<br>E |
| pLOF | 6 | 1.33E+08 | C     | A  | lof  | MOXD1   | p.G436X     | FALS<br>E | FALS<br>E | FALS<br>E | FALS<br>E |
| pLOF | 6 | 1.33E+08 | AG    | A  | lof  | TAAR6   | p.Q329fs    | FALS<br>E | FALS<br>E | FALS<br>E | FALS<br>E |
| pLOF | 6 | 1.49E+08 | CG    | C  | lof  | SASH1   | p.P19fs     | FALS<br>E | TRUE      | FALS<br>E | FALS<br>E |
| pLOF | 6 | 1.5E+08  | AC    | A  | lof  | LRP11   | .           | FALS<br>E | FALS<br>E | FALS<br>E | FALS<br>E |
| pLOF | 6 | 1.56E+08 | TG    | T  | lof  | TIAM2   | p.Val1657fs | FALS<br>E | FALS<br>E | FALS<br>E | FALS<br>E |
| pLOF | 6 | 1.6E+08  | C     | A  | lof  | PNLDC1  | p.S92X      | FALS<br>E | FALS<br>E | FALS<br>E | FALS<br>E |
| pLOF | 6 | 1.64E+08 | TG    | T  | lof  | PACRG   | p.G261fs    | FALS<br>E | FALS<br>E | FALS<br>E | FALS<br>E |
| pLOF | 7 | 2644541  | CA    | C  | lof  | IQCE    | p.R554fs    | FALS<br>E | FALS<br>E | FALS<br>E | FALS<br>E |
| pLOF | 7 | 6057531  | T     | A  | lof  | AIMP2   | p.C143X     | FALS<br>E | TRUE      | FALS<br>E | FALS<br>E |
| pLOF | 7 | 6509298  | G     | A  | lof  | KDELR2  | p.R94X      | FALS<br>E | TRUE      | FALS<br>E | FALS<br>E |
| pLOF | 7 | 7222452  | G     | A  | lof  | C1GALT1 | NA          | FALS<br>E | FALS<br>E | FALS<br>E | TRUE      |
| pLOF | 7 | 11514154 | G     | A  | lof  | THSD7A  | p.R687X     | FALS<br>E | FALS<br>E | FALS<br>E | TRUE      |
| pLOF | 7 | 17865710 | A     | T  | lof  | SNX13   | p.L547X     | FALS<br>E | FALS<br>E | FALS<br>E | FALS<br>E |
| pLOF | 7 | 20685726 | G     | T  | lof  | ABCB5   | p.G316X     | FALS<br>E | FALS<br>E | FALS<br>E | FALS<br>E |
| dDNV | 7 | 23340587 | G     | A  | misD | MALSU1  | p.G129E     | FALS<br>E | FALS<br>E | FALS<br>E | FALS<br>E |
| pLOF | 7 | 24843989 | C     | A  | lof  | OSBP13  | p.E838X     | FALS<br>E | FALS<br>E | FALS<br>E | FALS<br>E |
| dDNV | 7 | 36194427 | G     | A  | misD | EEPD1   | p.R165H     | FALS<br>E | FALS<br>E | FALS<br>E | FALS<br>E |
| pLOF | 7 | 36589044 | C     | A  | lof  | AOAH    | .           | FALS<br>E | FALS<br>E | FALS<br>E | FALS<br>E |
| pLOF | 7 | 37960615 | G     | A  | lof  | EPDR1   | p.W25X      | FALS<br>E | FALS<br>E | FALS<br>E | FALS<br>E |
| pLOF | 7 | 39612204 | TC    | T  | lof  | YAE1D1  | p.S194X     | FALS<br>E | FALS<br>E | FALS<br>E | FALS<br>E |
| pLOF | 7 | 43447331 | G     | A  | lof  | HECW1   | NA          | FALS<br>E | FALS<br>E | FALS<br>E | TRUE      |
| pLOF | 7 | 44579274 | GCAAC | G  | lof  | NPC1L1  | p.Val240fs  | FALS<br>E | FALS<br>E | FALS<br>E | FALS<br>E |
| pLOF | 7 | 45009011 | C     | T  | lof  | MYO1G   | .           | FALS<br>E | FALS<br>E | FALS<br>E | FALS<br>E |
| pLOF | 7 | 47840312 | G     | A  | lof  | PKD1L1  | p.Q2710X    | FALS<br>E | FALS<br>E | FALS<br>E | FALS<br>E |

|      |   |          |        |      |      |         |             |       |       |       |       |
|------|---|----------|--------|------|------|---------|-------------|-------|-------|-------|-------|
| pLOF | 7 | 55886818 | A      | G    | lof  | 14-Sep  | .           | FALSE | FALSE | FALSE | FALSE |
| pLOF | 7 | 56082817 | C      | A    | lof  | PSPH    | p.G157X     | FALSE | FALSE | FALSE | FALSE |
| pLOF | 7 | 63982537 | G      | GT   | lof  | ZNF680  | p.Gln199fs  | FALSE | FALSE | FALSE | FALSE |
| pLOF | 7 | 76908378 | G      | T    | lof  | CCDC146 | p.E552X     | FALSE | FALSE | FALSE | FALSE |
| pLOF | 7 | 86991162 | AGGACT | A    | lof  | CROT    | p.R209fs    | FALSE | FALSE | FALSE | FALSE |
| pLOF | 7 | 87180040 | C      | CAAG | lof  | ABCB1   | .           | FALSE | FALSE | FALSE | FALSE |
| pLOF | 7 | 99145077 | GT     | G    | lof  | FAM200A | p.N318fs    | FALSE | FALSE | FALSE | FALSE |
| pLOF | 7 | 99226935 | CT     | C    | lof  | ZSCAN25 | p.C310fs    | FALSE | FALSE | FALSE | FALSE |
| pLOF | 7 | 99802722 | TC     | T    | lof  | STAG3   | p.Arg1018fs | FALSE | FALSE | FALSE | FALSE |
| pLOF | 7 | 99811411 | TAC    | T    | lof  | STAG3   | p.T1218fs   | FALSE | FALSE | FALSE | FALSE |
| pLOF | 7 | 1E+08    | C      | A    | lof  | ZCWPW1  | p.G467X     | FALSE | FALSE | FALSE | FALSE |
| pLOF | 7 | 1E+08    | TCA    | T    | lof  | SRRT    | NA          | FALSE | TRUE  | FALSE | TRUE  |
| pLOF | 7 | 1.02E+08 | C      | T    | lof  | ALKBH4  | p.W97X      | FALSE | FALSE | FALSE | FALSE |
| pLOF | 7 | 1.05E+08 | T      | A    | lof  | RINT1   | p.Y55X      | FALSE | FALSE | FALSE | FALSE |
| pLOF | 7 | 1.05E+08 | TC     | T    | lof  | RINT1   | p.P759fs    | FALSE | FALSE | FALSE | FALSE |
| pLOF | 7 | 1.06E+08 | C      | T    | lof  | CDHR3   | p.R166X     | FALSE | FALSE | FALSE | FALSE |
| pLOF | 7 | 1.07E+08 | C      | CA   | lof  | SLC26A4 | p.A51fs     | FALSE | FALSE | FALSE | FALSE |
| pLOF | 7 | 1.08E+08 | C      | A    | lof  | PNPLA8  | p.E173X     | FALSE | FALSE | FALSE | FALSE |
| pLOF | 7 | 1.23E+08 | ACACTT | A    | lof  | SLC13A1 | p.E185fs    | FALSE | FALSE | FALSE | FALSE |
| dDNV | 7 | 1.27E+08 | G      | A    | misD | PAX4    | 0           | FALSE | FALSE | FALSE | FALSE |
| pLOF | 7 | 1.28E+08 | G      | A    | lof  | FAM71F1 | .           | FALSE | FALSE | FALSE | FALSE |
| dDNV | 7 | 1.29E+08 | G      | A    | misD | IRF5    | p.V78M      | FALSE | FALSE | FALSE | FALSE |
| pLOF | 7 | 1.34E+08 | G      | A    | lof  | LRGUK   | .           | FALSE | FALSE | FALSE | FALSE |
| pLOF | 7 | 1.34E+08 | A      | G    | lof  | LRGUK   | .           | FALSE | FALSE | FALSE | FALSE |
| pLOF | 7 | 1.38E+08 | A      | G    | lof  | SVOP    | L           | FALSE | FALSE | FALSE | FALSE |
| pLOF | 7 | 1.41E+08 | G      | A    | lof  | TAS2R3  | p.W89X      | FALSE | FALSE | FALSE | FALSE |
| pLOF | 7 | 1.42E+08 | G      | C    | lof  | MGA     | M           | FALSE | FALSE | FALSE | FALSE |

|            |   |          |                     |    |      |           |            |        |        |        |        |
|------------|---|----------|---------------------|----|------|-----------|------------|--------|--------|--------|--------|
| pLOF       | 7 | 1.42E+08 | GC                  | G  | lof  | MGA M     | p.Ile345fs | FALS E | FALS E | FALS E | FALS E |
| pLOF       | 7 | 1.43E+08 | A                   | AG | lof  | EPHA 1    | p.S334fs   | FALS E | FALS E | FALS E | FALS E |
| pLOF       | 7 | 1.5E+08  | G                   | A  | lof  | SSPO      | p.W2685X   | FALS E | FALS E | FALS E | FALS E |
| pLOF       | 7 | 1.51E+08 | AC                  | A  | lof  | ABCB 8    | p.T494fs   | FALS E | FALS E | FALS E | FALS E |
| pLOF       | 7 | 1.59E+08 | CCC<br>CATC<br>CGAT | C  | lof  | VIPR 2    | p.Ile388fs | FALS E | FALS E | FALS E | FALS E |
| pLOF       | 8 | 2065710  | CG                  | C  | lof  | MYO M2    | p.T1141fs  | FALS E | FALS E | FALS E | FALS E |
| dDNV /pLOF | 8 | 11566422 | C                   | T  | lof  | GATA 4    | p.Arg201*  | FALS E | FALS E | FALS E | FALS E |
| pLOF       | 8 | 17739583 | C                   | A  | lof  | FGL1      | p.E57X     | FALS E | FALS E | FALS E | FALS E |
| pLOF       | 8 | 20004768 | C                   | G  | lof  | SLC18A1   | .          | FALS E | FALS E | FALS E | FALS E |
| pLOF       | 8 | 20028637 | G                   | A  | lof  | SLC18A1   | p.Q279X    | FALS E | FALS E | FALS E | FALS E |
| pLOF       | 8 | 22006410 | AAG                 | A  | lof  | LGI3      | p.S303fs   | FALS E | FALS E | FALS E | FALS E |
| pLOF       | 8 | 22398262 | G                   | GT | lof  | PPP3 CC   | p.A505fs   | FALS E | FALS E | FALS E | FALS E |
| pLOF       | 8 | 27369388 | C                   | A  | lof  | EPHX 2    | p.C232X    | FALS E | FALS E | FALS E | FALS E |
| pLOF       | 8 | 33358006 | ACT                 | A  | lof  | TTI2      | p.R420fs   | FALS E | FALS E | FALS E | FALS E |
| pLOF       | 8 | 33369537 | C                   | A  | lof  | TTI2      | p.E199X    | FALS E | FALS E | FALS E | FALS E |
| pLOF       | 8 | 37699776 | A                   | AG | lof  | ADG RA2   | p.K1307fs  | FALS E | FALS E | FALS E | FALS E |
| pLOF       | 8 | 38008325 | CGC<br>TAGC<br>A    | C  | lof  | STAR      | p.L2fs     | FALS E | FALS E | FALS E | FALS E |
| pLOF       | 8 | 38848927 | C                   | T  | lof  | TM2D 2    | p.Trp190*  | FALS E | TRUE   | FALS E | FALS E |
| pLOF       | 8 | 54764525 | G                   | A  | lof  | RGS2 0    | p.Trp22*   | FALS E | FALS E | FALS E | FALS E |
| dDNV       | 8 | 54870931 | G                   | A  | misD | RGS2 0    | p.M360I    | FALS E | FALS E | FALS E | FALS E |
| pLOF       | 8 | 56910991 | CAT                 | C  | lof  | LYN       | p.M380fs   | FALS E | FALS E | FALS E | TRUE   |
| pLOF       | 8 | 66594687 | G                   | A  | lof  | MTFR 1    | .          | FALS E | TRUE   | FALS E | FALS E |
| pLOF       | 8 | 66619392 | G                   | GA | lof  | MTFR 1    | p.G222fs   | FALS E | TRUE   | FALS E | FALS E |
| pLOF       | 8 | 75928931 | C                   | T  | lof  | CRIS PLD1 | p.Q287X    | FALS E | FALS E | FALS E | FALS E |
| dDNV       | 8 | 81577102 | C                   | G  | misD | ZNF704    | p.S292T    | FALS E | FALS E | FALS E | TRUE   |
| dDNV       | 8 | 94797492 | C                   | G  | misD | TME M67   | p.P311A    | FALS E | FALS E | FALS E | FALS E |

|               |   |          |           |     |      |             |            |           |           |           |           |
|---------------|---|----------|-----------|-----|------|-------------|------------|-----------|-----------|-----------|-----------|
| pLOF          | 8 | 95262551 | AG        | A   | lof  | GEM         | p.L293fs   | FALS<br>E | FALS<br>E | FALS<br>E | FALS<br>E |
| pLOF          | 8 | 96057773 | GA        | G   | lof  | NDUF<br>AF6 | p.E160fs   | FALS<br>E | FALS<br>E | FALS<br>E | FALS<br>E |
| pLOF          | 8 | 97342501 | C         | T   | lof  | PTDS<br>S1  | p.R412X    | FALS<br>E | FALS<br>E | TRUE      | FALS<br>E |
| pLOF          | 8 | 1.01E+08 | CA        | C   | lof  | VPS1<br>3B  | p.Q1420fs  | FALS<br>E | FALS<br>E | TRUE      | FALS<br>E |
| pLOF          | 8 | 1.05E+08 | T         | A   | lof  | RIMS<br>2   | .          | FALS<br>E | FALS<br>E | FALS<br>E | TRUE      |
| dDNV<br>/pLOF | 8 | 1.08E+08 | C         | G   | lof  | OXR1        | p.S822X    | FALS<br>E | FALS<br>E | FALS<br>E | TRUE      |
| pLOF          | 8 | 1.21E+08 | C         | T   | lof  | DSC<br>C1   | NA         | FALS<br>E | FALS<br>E | FALS<br>E | FALS<br>E |
| pLOF          | 8 | 1.21E+08 | G         | T   | lof  | COL1<br>4A1 | p.E674X    | FALS<br>E | FALS<br>E | FALS<br>E | FALS<br>E |
| pLOF          | 8 | 1.21E+08 | C         | T   | lof  | COL1<br>4A1 | p.Q1776X   | FALS<br>E | FALS<br>E | FALS<br>E | FALS<br>E |
| pLOF          | 8 | 1.25E+08 | C         | T   | lof  | FER1<br>L6  | p.Q1412X   | FALS<br>E | FALS<br>E | FALS<br>E | FALS<br>E |
| dDNV          | 8 | 1.42E+08 | C         | A   | misD | AGO2        | p.G201V    | FALS<br>E | TRUE      | FALS<br>E | TRUE      |
| pLOF          | 8 | 1.44E+08 | G         | GT  | lof  | GML         | p.Cys48fs  | FALS<br>E | FALS<br>E | FALS<br>E | FALS<br>E |
| pLOF          | 8 | 1.44E+08 | C         | CCA | lof  | ZNF6<br>96  | p.H167fs   | FALS<br>E | FALS<br>E | FALS<br>E | FALS<br>E |
| pLOF          | 8 | 1.45E+08 | AG        | A   | lof  | MRO<br>H6   | p.L422fs   | FALS<br>E | FALS<br>E | FALS<br>E | FALS<br>E |
| pLOF          | 8 | 1.45E+08 | CG        | C   | lof  | MRO<br>H6   | p.P234fs   | FALS<br>E | FALS<br>E | FALS<br>E | FALS<br>E |
| pLOF          | 8 | 1.45E+08 | C         | CG  | lof  | EEF1<br>D   | p.Leu272fs | FALS<br>E | TRUE      | FALS<br>E | FALS<br>E |
| pLOF          | 8 | 1.45E+08 | C         | T   | lof  | TSTA<br>3   | p.W208X    | FALS<br>E | FALS<br>E | FALS<br>E | FALS<br>E |
| dDNV<br>/pLOF | 8 | 1.45E+08 | GCTT<br>T | G   | lof  | ZNF6<br>23  | p.A343fs   | FALS<br>E | FALS<br>E | FALS<br>E | FALS<br>E |
| pLOF          | 8 | 1.45E+08 | C         | A   | lof  | CCD<br>C166 | p.X440L    | FALS<br>E | FALS<br>E | FALS<br>E | FALS<br>E |
| pLOF          | 8 | 1.45E+08 | CT        | C   | lof  | EPPK<br>1   | p.E1281fs  | FALS<br>E | FALS<br>E | FALS<br>E | FALS<br>E |
| pLOF          | 8 | 1.45E+08 | G         | GCT | lof  | OPLA<br>H   | p.S1153fs  | FALS<br>E | FALS<br>E | FALS<br>E | FALS<br>E |
| dDNV          | 8 | 1.45E+08 | G         | A   | misD | EXOS<br>C4  | p.G37S     | FALS<br>E | TRUE      | FALS<br>E | FALS<br>E |
| pLOF          | 8 | 1.46E+08 | C         | CA  | lof  | FBXL<br>6   | p.L39fs    | FALS<br>E | TRUE      | FALS<br>E | FALS<br>E |
| pLOF          | 8 | 1.46E+08 | G         | C   | lof  | SLC3<br>9A4 | p.Y329X    | FALS<br>E | FALS<br>E | FALS<br>E | FALS<br>E |
| pLOF          | 9 | 4684970  | C         | T   | lof  | CDC3<br>7L1 | p.Gln76*   | FALS<br>E | FALS<br>E | FALS<br>E | TRUE      |
| pLOF          | 9 | 13138141 | C         | A   | lof  | MPD<br>Z    | p.E1339X   | FALS<br>E | TRUE      | FALS<br>E | FALS<br>E |

|           |   |          |        |     |      |           |            |       |       |       |       |
|-----------|---|----------|--------|-----|------|-----------|------------|-------|-------|-------|-------|
| pLOF      | 9 | 15433562 | GT     | G   | lof  | SNAPC3    | p.F136fs   | FALSE | TRUE  | FALSE | FALSE |
| pLOF      | 9 | 15745534 | GT     | G   | lof  | CCDC171   | p.R859fs   | FALSE | FALSE | FALSE | FALSE |
| pLOF      | 9 | 17502606 | A      | T   | lof  | CNTLN     | p.K1393X   | FALSE | FALSE | FALSE | FALSE |
| dDNV      | 9 | 19049689 | T      | C   | misD | RRA GA    | p.L11P     | FALSE | TRUE  | FALSE | FALSE |
| pLOF      | 9 | 21007120 | T      | C   | lof  | HACD4     | .          | FALSE | FALSE | FALSE | FALSE |
| pLOF      | 9 | 32436396 | G      | A   | lof  | ACO1      | .          | FALSE | TRUE  | FALSE | FALSE |
| dDNV      | 9 | 34372784 | T      | G   | misD | KIAA1161  | p.Asp19Ala | FALSE | FALSE | FALSE | FALSE |
| pLOF      | 9 | 34520656 | GA     | G   | lof  | DNAI1     | p.E668fs   | FALSE | FALSE | FALSE | FALSE |
| pLOF      | 9 | 35906601 | C      | CCA | lof  | HRCT1     | p.His107fs | FALSE | FALSE | FALSE | FALSE |
| pLOF      | 9 | 37729761 | C      | T   | lof  | FRMPD1    | p.R217X    | FALSE | FALSE | FALSE | FALSE |
| dDNV/pLOF | 9 | 71833276 | G      | T   | lof  | TJP2      | NA         | FALSE | TRUE  | FALSE | FALSE |
| pLOF      | 9 | 72929753 | G      | T   | lof  | SMC5      | .          | FALSE | TRUE  | FALSE | FALSE |
| pLOF      | 9 | 75315444 | G      | T   | lof  | TMC1      | p.E83X     | FALSE | FALSE | FALSE | FALSE |
| pLOF      | 9 | 79321843 | C      | A   | lof  | PRUNE2    | p.Glu1783* | FALSE | FALSE | FALSE | FALSE |
| dDNV      | 9 | 85926815 | G      | A   | misD | FRMD3     | p.H254Y    | FALSE | FALSE | FALSE | FALSE |
| pLOF      | 9 | 99227618 | G      | A   | lof  | HABP4     | .          | FALSE | FALSE | FALSE | FALSE |
| pLOF      | 9 | 99525916 | T      | C   | lof  | ZNF510    | .          | FALSE | FALSE | FALSE | FALSE |
| pLOF      | 9 | 99799532 | A      | G   | lof  | CTSV      | NA         | FALSE | TRUE  | FALSE | FALSE |
| pLOF      | 9 | 1.07E+08 | A      | AC  | lof  | OR13C3    | p.V316fs   | FALSE | FALSE | FALSE | FALSE |
| pLOF      | 9 | 1.08E+08 | ACGG   | A   | lof  | NIPSNAP3B | p.T27fs    | FALSE | FALSE | FALSE | FALSE |
| pLOF      | 9 | 1.08E+08 | C      | T   | lof  | ABCA1     | .          | FALSE | FALSE | FALSE | FALSE |
| dDNV      | 9 | 1.08E+08 | G      | A   | misD | SLC44A1   | p.D63N     | FALSE | FALSE | FALSE | TRUE  |
| pLOF      | 9 | 1.15E+08 | G      | T   | lof  | HSDL2     | p.E185X    | FALSE | FALSE | FALSE | FALSE |
| pLOF      | 9 | 1.16E+08 | G      | A   | lof  | SLC46A2   | p.R392X    | FALSE | FALSE | FALSE | FALSE |
| pLOF      | 9 | 1.16E+08 | TATATG | T   | lof  | SLC46A2   | p.I291fs   | FALSE | FALSE | FALSE | FALSE |
| pLOF      | 9 | 1.3E+08  | T      | A   | lof  | ZNF79     | .          | FALSE | FALSE | FALSE | FALSE |

|               |    |          |                                 |    |     |          |                    |       |       |       |       |
|---------------|----|----------|---------------------------------|----|-----|----------|--------------------|-------|-------|-------|-------|
| pLOF          | 9  | 1.3E+08  | CAT                             | C  | lof | TOR2A    | p.Y101fs           | FALSE | FALSE | FALSE | FALSE |
| pLOF          | 9  | 1.31E+08 | CAG<br>GA<br>CT<br>TCCT<br>G    | C  | lof | PKN3     | p.Q439fs           | FALSE | FALSE | FALSE | FALSE |
| pLOF          | 9  | 1.32E+08 | A                               | G  | lof | TBC1D13  | p.Met1?            | FALSE | TRUE  | FALSE | FALSE |
| pLOF          | 9  | 1.36E+08 | CCT<br>GCC<br>CCC<br>CGA<br>AGA | C  | lof | GBGT1    | p.V264fs           | FALSE | FALSE | FALSE | FALSE |
| pLOF          | 9  | 1.36E+08 | G                               | A  | lof | MED22    | p.Q47X             | FALSE | TRUE  | FALSE | FALSE |
| pLOF          | 9  | 1.39E+08 | G                               | T  | lof | NOTCH1   | p.C1521X           | FALSE | TRUE  | FALSE | TRUE  |
| pLOF          | 9  | 1.39E+08 | GT                              | G  | lof | NOTCH1   | p.Tyr899fs         | FALSE | TRUE  | FALSE | TRUE  |
| pLOF          | 9  | 1.4E+08  | G                               | T  | lof | FAM69B   | .                  | FALSE | FALSE | FALSE | FALSE |
| pLOF          | 9  | 1.4E+08  | T                               | TG | lof | C9orf142 | p.Asp2fs           | FALSE | FALSE | FALSE | FALSE |
| pLOF          | 9  | 1.4E+08  | C                               | T  | lof | ENTPD2   | .                  | FALSE | FALSE | FALSE | FALSE |
| pLOF          | 9  | 1.4E+08  | C                               | T  | lof | ENTPD2   | .                  | FALSE | FALSE | FALSE | FALSE |
| pLOF          | 9  | 1.4E+08  | C                               | CG | lof | DPP7     | p.R143fs           | FALSE | FALSE | FALSE | FALSE |
| pLOF          | 9  | 1.4E+08  | G                               | A  | lof | TPRN     | p.Q586X            | FALSE | FALSE | FALSE | FALSE |
| pLOF          | 9  | 1.4E+08  | C                               | T  | lof | EXD3     | .                  | FALSE | FALSE | FALSE | FALSE |
| pLOF          | 9  | 1.4E+08  | G                               | GT | lof | NOXA1    | p.D440fs           | FALSE | FALSE | FALSE | FALSE |
| pLOF          | 10 | 1094841  | GA                              | G  | lof | IDI1     | p.H34fs            | FALSE | TRUE  | FALSE | FALSE |
| pLOF          | 10 | 5765639  | G                               | A  | lof | FAM208B  | .                  | FALSE | FALSE | FALSE | FALSE |
| pLOF          | 10 | 17432555 | C                               | A  | lof | ST8SLA6  | p.E89X             | FALSE | FALSE | FALSE | FALSE |
| pLOF          | 10 | 23295906 | T                               | TA | lof | ARMC3    | p.Y609_V610delinsX | FALSE | FALSE | FALSE | FALSE |
| pLOF          | 10 | 26241208 | GTAA<br>GTCA                    | G  | lof | MYO3A    | .                  | FALSE | FALSE | FALSE | FALSE |
| dDNV<br>/pLOF | 10 | 27066140 | G                               | A  | lof | ABI1     | p.R123X            | FALSE | TRUE  | FALSE | TRUE  |
| pLOF          | 10 | 28413937 | AC                              | A  | lof | MPP7     | .                  | FALSE | FALSE | FALSE | FALSE |
| pLOF          | 10 | 45486395 | G                               | A  | lof | RASSF4   | NA                 | FALSE | FALSE | FALSE | FALSE |



|            |    |          |           |     |      |          |            |       |       |       |       |
|------------|----|----------|-----------|-----|------|----------|------------|-------|-------|-------|-------|
| pLOF       | 10 | 50025435 | T         | TC  | lof  | WDFY4    | p.F1829fs  | FALSE | FALSE | TRUE  | FALSE |
| pLOF       | 10 | 50950998 | C         | CAA | lof  | OGDHL    | p.A630fs   | FALSE | FALSE | FALSE | FALSE |
| pLOF       | 10 | 70105527 | A         | T   | lof  | RUFY2    | p.X642R    | FALSE | TRUE  | FALSE | FALSE |
| dDNV       | 10 | 73047432 | C         | T   | misD | UNC5B    | p.R271W    | FALSE | FALSE | FALSE | FALSE |
| pLOF       | 10 | 74879790 | TGAA G    | T   | lof  | NUDT13   | p.L33fs    | FALSE | FALSE | FALSE | FALSE |
| pLOF       | 10 | 74994978 | C         | T   | lof  | FAM149B1 | p.Q502X    | FALSE | TRUE  | FALSE | FALSE |
| pLOF       | 10 | 82187174 | G         | A   | lof  | FAM213A  | p.W166X    | FALSE | TRUE  | FALSE | FALSE |
| pLOF       | 10 | 82330050 | C         | T   | lof  | SH2D4B   | p.Q109X    | FALSE | FALSE | FALSE | FALSE |
| pLOF       | 10 | 85992201 | G         | A   | lof  | LRIT1    | p.Q452X    | FALSE | FALSE | FALSE | FALSE |
| pLOF       | 10 | 90574328 | AC        | A   | lof  | LIPM     | p.N169fs   | FALSE | FALSE | FALSE | FALSE |
| pLOF       | 10 | 92680094 | C         | CT  | lof  | ANKRD1   | p.K13fs    | FALSE | FALSE | FALSE | FALSE |
| pLOF       | 10 | 96066442 | C         | T   | lof  | PLCE1    | p.R1961X   | FALSE | FALSE | FALSE | FALSE |
| pLOF       | 10 | 98087253 | CTG       | C   | lof  | DNTT     | p.Val303fs | FALSE | FALSE | FALSE | FALSE |
| pLOF       | 10 | 99969478 | CAG       | C   | lof  | R3HC1L   | p.S536fs   | FALSE | FALSE | FALSE | FALSE |
| pLOF       | 10 | 1E+08    | AG        | A   | lof  | PYROXD2  | p.L446fs   | FALSE | FALSE | FALSE | FALSE |
| pLOF       | 10 | 1.02E+08 | G         | GC  | lof  | SEC31B   | p.R247fs   | FALSE | FALSE | FALSE | FALSE |
| pLOF       | 10 | 1.04E+08 | GC        | G   | lof  | PPRC1    | p.L155fs   | FALSE | TRUE  | FALSE | TRUE  |
| pLOF       | 10 | 1.04E+08 | GC        | G   | lof  | C10orf95 | p.Q242fs   | FALSE | FALSE | FALSE | FALSE |
| pLOF       | 10 | 1.06E+08 | CCTGTTT T | C   | lof  | OBFC1    | p.I54fs    | FALSE | FALSE | FALSE | FALSE |
| pLOF       | 10 | 1.16E+08 | C         | A   | lof  | PLEKHS1  | p.Y113X    | FALSE | FALSE | FALSE | FALSE |
| pLOF       | 10 | 1.18E+08 | GTCGGC GT | G   | lof  | PNLIP    | p.S154fs   | FALSE | FALSE | FALSE | FALSE |
| pLOF       | 10 | 1.26E+08 | CG        | C   | lof  | CPXM2    | p.P263fs   | FALSE | FALSE | FALSE | FALSE |
| pLOF       | 10 | 1.26E+08 | TG        | T   | lof  | LHPP     | p.Leu142fs | FALSE | FALSE | FALSE | FALSE |
| pLOF       | 10 | 1.35E+08 | G         | A   | lof  | ECHS1    | p.Q162X    | FALSE | FALSE | FALSE | FALSE |
| pLOF       | 10 | 1.35E+08 | G         | T   | lof  | MTG1     | .          | FALSE | FALSE | FALSE | FALSE |
| dDNV /pLOF | 11 | 609337   | GCA       | G   | lof  | PHRF1    | p.S1293fs  | FALSE | TRUE  | TRUE  | FALSE |

|      |    |          |           |    |     |                                    |                |           |           |           |           |
|------|----|----------|-----------|----|-----|------------------------------------|----------------|-----------|-----------|-----------|-----------|
| pLOF | 11 | 613848   | CTG       | C  | lof | IRF7                               | p.Pro274fs     | FALS<br>E | FALS<br>E | FALS<br>E | FALS<br>E |
| pLOF | 11 | 798081   | AC        | A  | lof | PAN<br>O1                          | p.P15<br>3fs   | FALS<br>E | FALS<br>E | FALS<br>E | FALS<br>E |
| pLOF | 11 | 1078667  | G         | A  | lof | MUC<br>2                           | NA             | FALS<br>E | FALS<br>E | FALS<br>E | FALS<br>E |
| pLOF | 11 | 2909674  | CT        | C  | lof | SLC2<br>2A18<br>AS                 | p.K16<br>6fs   | FALS<br>E | FALS<br>E | FALS<br>E | FALS<br>E |
| pLOF | 11 | 3114102  | G         | C  | lof | OSBP<br>L5                         | p.Y70<br>9X    | FALS<br>E | FALS<br>E | FALS<br>E | FALS<br>E |
| pLOF | 11 | 3661226  | G         | A  | lof | ART5                               | p.R14<br>5X    | FALS<br>E | FALS<br>E | FALS<br>E | FALS<br>E |
| pLOF | 11 | 4566632  | TTGA<br>C | T  | lof | OR52<br>M1                         | p.I71f<br>s    | FALS<br>E | FALS<br>E | TRUE      | FALS<br>E |
| pLOF | 11 | 5529357  | G         | GC | lof | UBQL<br>N3                         | p.P47<br>8fs   | FALS<br>E | FALS<br>E | FALS<br>E | FALS<br>E |
| pLOF | 11 | 5624690  | C         | T  | lof | TRIM<br>6,TRI<br>M6-<br>TRIM<br>34 | p.Q50<br>X     | FALS<br>E | FALS<br>E | FALS<br>E | FALS<br>E |
| pLOF | 11 | 5701123  | A         | T  | lof | TRIM<br>5                          | p.C95<br>X     | FALS<br>E | FALS<br>E | FALS<br>E | FALS<br>E |
| pLOF | 11 | 5969442  | C         | CA | lof | OR56<br>A3                         | p.A28<br>9fs   | FALS<br>E | FALS<br>E | FALS<br>E | FALS<br>E |
| pLOF | 11 | 7091688  | G         | A  | lof | NLRP<br>14                         | .              | FALS<br>E | FALS<br>E | FALS<br>E | FALS<br>E |
| pLOF | 11 | 7726182  | C         | T  | lof | OVC<br>H2                          | p.W4<br>3X     | FALS<br>E | FALS<br>E | FALS<br>E | FALS<br>E |
| pLOF | 11 | 12495531 | G         | A  | lof | PARV<br>A                          | .              | FALS<br>E | TRUE      | FALS<br>E | FALS<br>E |
| pLOF | 11 | 17428606 | C         | T  | lof | ABCC<br>8                          | p.W9<br>98X    | FALS<br>E | FALS<br>E | FALS<br>E | FALS<br>E |
| pLOF | 11 | 18425273 | GTC       | G  | lof | LDHA                               | p.V20<br>9fs   | FALS<br>E | TRUE      | FALS<br>E | FALS<br>E |
| pLOF | 11 | 18745690 | TTGT<br>C | T  | lof | IGSF<br>22                         | p.Thr<br>31fs  | FALS<br>E | FALS<br>E | FALS<br>E | FALS<br>E |
| pLOF | 11 | 19186675 | G         | A  | lof | ZDHH<br>C13                        | p.Trp<br>458*  | FALS<br>E | FALS<br>E | FALS<br>E | FALS<br>E |
| pLOF | 11 | 19197500 | C         | A  | lof | ZDHH<br>C13                        | p.S62<br>1X    | FALS<br>E | FALS<br>E | FALS<br>E | FALS<br>E |
| pLOF | 11 | 34218927 | C         | A  | lof | ABTB<br>2                          | p.E39<br>7X    | FALS<br>E | FALS<br>E | FALS<br>E | FALS<br>E |
| pLOF | 11 | 34905048 | A         | C  | lof | APIP                               | p.Y15<br>5X    | FALS<br>E | FALS<br>E | FALS<br>E | FALS<br>E |
| pLOF | 11 | 44626642 | T         | A  | lof | CD82                               | p.Y57<br>X     | FALS<br>E | FALS<br>E | FALS<br>E | FALS<br>E |
| pLOF | 11 | 46385929 | G         | A  | lof | DGKZ                               | NA             | FALS<br>E | TRUE      | FALS<br>E | FALS<br>E |
| pLOF | 11 | 48238802 | G         | A  | lof | OR4B<br>1                          | p.W1<br>47X    | FALS<br>E | FALS<br>E | FALS<br>E | FALS<br>E |
| pLOF | 11 | 59947354 | CT        | C  | lof | MS4A<br>6A                         | p.Val<br>106fs | FALS<br>E | FALS<br>E | FALS<br>E | FALS<br>E |

|           |    |          |     |       |     |           |            |       |       |       |       |
|-----------|----|----------|-----|-------|-----|-----------|------------|-------|-------|-------|-------|
| pLOF      | 11 | 61041980 | A   | AC    | lof | VWCE      | p.C524fs   | FALSE | FALSE | FALSE | FALSE |
| dDNV/pLOF | 11 | 63065135 | C   | T     | lof | SLC22A10  | p.R256X    | FALSE | FALSE | FALSE | FALSE |
| pLOF      | 11 | 64787900 | G   | T     | lof | ARL2      | p.G117X    | FALSE | TRUE  | FALSE | FALSE |
| pLOF      | 11 | 65546682 | C   | A     | lof | AP5B1     | p.E428X    | FALSE | FALSE | FALSE | FALSE |
| pLOF      | 11 | 66061941 | A   | AGGCC | lof | TME M151A | p.E75fs    | FALSE | FALSE | FALSE | FALSE |
| pLOF      | 11 | 66101688 | GA  | G     | lof | RIN1      | p.V431fs   | FALSE | FALSE | FALSE | FALSE |
| pLOF      | 11 | 66358747 | G   | GT    | lof | CCDC87    | p.N580fs   | FALSE | FALSE | FALSE | FALSE |
| pLOF      | 11 | 66742862 | T   | A     | lof | C11orf86  | p.L10X     | FALSE | FALSE | FALSE | FALSE |
| pLOF      | 11 | 67412557 | A   | AG    | lof | ACY3      | p.Leu198fs | FALSE | FALSE | FALSE | FALSE |
| pLOF      | 11 | 68204467 | G   | T     | lof | LRP5      | p.E1371X   | FALSE | TRUE  | FALSE | TRUE  |
| pLOF      | 11 | 68483305 | C   | CT    | lof | MTL5      | p.K340fs   | FALSE | FALSE | FALSE | FALSE |
| dDNV/pLOF | 11 | 68839405 | CT  | C     | lof | TPCN2     | p.S326fs   | FALSE | FALSE | FALSE | FALSE |
| pLOF      | 11 | 72465786 | A   | ATT   | lof | STAR D10  | p.Asp138fs | FALSE | FALSE | FALSE | FALSE |
| pLOF      | 11 | 73834032 | C   | T     | lof | C2CD3     | .          | FALSE | TRUE  | FALSE | FALSE |
| pLOF      | 11 | 74988484 | G   | T     | lof | ARRB1     | p.Tyr209*  | TRUE  | TRUE  | FALSE | TRUE  |
| pLOF      | 11 | 85367363 | GCT | G     | lof | TME M126A | p.Leu137fs | FALSE | TRUE  | FALSE | FALSE |
| pLOF      | 11 | 87908538 | G   | A     | lof | RAB38     | p.Gln22*   | FALSE | FALSE | FALSE | FALSE |
| pLOF      | 11 | 88911360 | G   | A     | lof | TYR       | p.W80X     | FALSE | FALSE | FALSE | FALSE |
| pLOF      | 11 | 93428801 | G   | A     | lof | KIAA1731  | NA         | FALSE | TRUE  | FALSE | FALSE |
| pLOF      | 11 | 93886656 | G   | A     | lof | PANX1     | .          | FALSE | TRUE  | FALSE | FALSE |
| pLOF      | 11 | 94823392 | G   | C     | lof | ENDOD1    | NA         | FALSE | FALSE | FALSE | FALSE |
| pLOF      | 11 | 94862041 | CA  | C     | lof | ENDOD1    | p.N268fs   | FALSE | FALSE | FALSE | FALSE |
| pLOF      | 11 | 1.02E+08 | C   | A     | lof | TME M123  | p.E65X     | FALSE | TRUE  | FALSE | TRUE  |
| pLOF      | 11 | 1.03E+08 | G   | A     | lof | DYN C2H1  | p.Trp3297* | FALSE | FALSE | FALSE | FALSE |
| pLOF      | 11 | 1.07E+08 | CAA | C     | lof | ALKBH8    | p.L52fs    | FALSE | FALSE | FALSE | FALSE |

|            |    |          |               |         |     |          |             |        |        |        |        |
|------------|----|----------|---------------|---------|-----|----------|-------------|--------|--------|--------|--------|
| dDNV /pLOF | 11 | 1.08E+08 | T             | TA      | lof | ATM      | p.Tyr731fs  | TRUE   | FALS E | FALS E | FALS E |
| pLOF       | 11 | 1.08E+08 | T             | TA      | lof | ATM      | p.Tyr731fs  | TRUE   | FALS E | FALS E | FALS E |
| pLOF       | 11 | 1.08E+08 | T             | C       | lof | EXPH5    | .           | FALS E | FALS E | FALS E | FALS E |
| pLOF       | 11 | 1.1E+08  | C             | T       | lof | ZC3H12C  | p.Arg161*   | FALS E | FALS E | FALS E | TRUE   |
| pLOF       | 11 | 1.14E+08 | GC            | G       | lof | TMPRSS5  | p.G339fs    | FALS E | FALS E | FALS E | FALS E |
| pLOF       | 11 | 1.14E+08 | A             | G       | lof | REXO2    | NA          | FALS E | FALS E | FALS E | FALS E |
| dDNV /pLOF | 11 | 1.21E+08 | T             | TCGA CG | lof | TECTA    | p.F1498fs   | FALS E | FALS E | FALS E | FALS E |
| pLOF       | 11 | 1.21E+08 | A             | T       | lof | TECTA    | .           | FALS E | FALS E | FALS E | FALS E |
| pLOF       | 11 | 1.23E+08 | T             | A       | lof | C11orf63 | .           | FALS E | FALS E | FALS E | FALS E |
| pLOF       | 11 | 1.23E+08 | G             | A       | lof | CLMP     | p.R274X     | FALS E | FALS E | FALS E | FALS E |
| pLOF       | 11 | 1.23E+08 | G             | A       | lof | GRAMD1B  | .           | FALS E | FALS E | FALS E | TRUE   |
| pLOF       | 11 | 1.24E+08 | GC            | G       | lof | TME M225 | p.S202fs    | FALS E | FALS E | FALS E | FALS E |
| pLOF       | 11 | 1.25E+08 | CA            | C       | lof | SIAE     | p.F164fs    | FALS E | FALS E | FALS E | FALS E |
| pLOF       | 11 | 1.26E+08 | CCTC TGCT GAA | C       | lof | CDO N    | p.Phe1208fs | FALS E | TRUE   | TRUE   | FALS E |
| pLOF       | 11 | 1.26E+08 | GC            | G       | lof | CDO N    | p.Ser441fs  | FALS E | TRUE   | TRUE   | FALS E |
| dDNV /pLOF | 11 | 1.26E+08 | G             | A       | lof | RPUS D4  | p.R272X     | FALS E | FALS E | FALS E | FALS E |
| pLOF       | 11 | 1.26E+08 | ATT           | A       | lof | RPUS D4  | p.K230fs    | FALS E | FALS E | FALS E | FALS E |
| pLOF       | 11 | 1.26E+08 | C             | T       | lof | DCPS     | p.Q332X     | FALS E | TRUE   | FALS E | FALS E |
| pLOF       | 11 | 1.3E+08  | G             | A       | lof | TME M45B | .           | FALS E | FALS E | FALS E | FALS E |
| dDNV /pLOF | 11 | 1.32E+08 | CA            | C       | lof | NTM      | p.N205fs    | FALS E | FALS E | FALS E | FALS E |
| dDNV /pLOF | 12 | 2973909  | G             | A       | lof | FOX M1   | p.R344X     | FALS E | TRUE   | FALS E | FALS E |
| pLOF       | 12 | 4554720  | TTC           | T       | lof | FGF6     | p.Q5fs      | FALS E | FALS E | FALS E | FALS E |
| pLOF       | 12 | 4634436  | TG            | T       | lof | C12orf4  | p.P237fs    | FALS E | FALS E | FALS E | FALS E |
| pLOF       | 12 | 4652929  | A             | AT      | lof | RAD51AP1 | p.Asp24fs   | FALS E | FALS E | FALS E | FALS E |

|            |    |          |                 |                         |      |          |            |        |        |        |        |
|------------|----|----------|-----------------|-------------------------|------|----------|------------|--------|--------|--------|--------|
| dDNV /pLOF | 12 | 7244261  | G               | GAGGT                   | lof  | C1R      | p.Leu5fs   | FALSEE | FALSEE | FALSEE | TRUE   |
| pLOF       | 12 | 7480967  | T               | C                       | lof  | ACSM4    | p.X581Q    | FALSEE | FALSEE | FALSEE | FALSEE |
| dDNV       | 12 | 9355165  | A               | T                       | misD | PZP      | p.V128D    | FALSEE | FALSEE | FALSEE | FALSEE |
| dDNV /pLOF | 12 | 9747903  | TGTTA           | T                       | lof  | KLRB1    | 0          | FALSEE | FALSEE | FALSEE | FALSEE |
| pLOF       | 12 | 9875299  | G               | A                       | lof  | CLECL1   | p.Gln143*  | FALSEE | FALSEE | FALSEE | FALSEE |
| pLOF       | 12 | 10145887 | C               | T                       | lof  | CLEC1B   | .          | FALSEE | FALSEE | FALSEE | FALSEE |
| dDNV /pLOF | 12 | 18836192 | T               | TAAAC                   | lof  | PLCZ1    | p.Y603fs   | FALSEE | FALSEE | FALSEE | FALSEE |
| pLOF       | 12 | 21051414 | C               | G                       | lof  | LST3     | p.Ser576*  | FALSEE | FALSEE | FALSEE | FALSEE |
| pLOF       | 12 | 21445271 | C               | G                       | lof  | SLCO1A2  | .          | FALSEE | FALSEE | FALSEE | FALSEE |
| pLOF       | 12 | 22214388 | T               | G                       | lof  | CMA5     | .          | FALSEE | TRUE   | FALSEE | TRUE   |
| pLOF       | 12 | 25257341 | C               | T                       | lof  | LRMP     | p.R365X    | FALSEE | FALSEE | FALSEE | FALSEE |
| pLOF       | 12 | 27135750 | AGCAGG          | A                       | lof  | TM7SF3   | p.A302fs   | FALSEE | FALSEE | FALSEE | FALSEE |
| dDNV       | 12 | 27470296 | T               | G                       | misD | STK38L   | p.Y289D    | FALSEE | FALSEE | FALSEE | TRUE   |
| pLOF       | 12 | 32134323 | A               | ACGTACC<br>CAAT<br>ATGC | lof  | KIAA1551 | p.N145fs   | FALSEE | TRUE   | FALSEE | FALSEE |
| pLOF       | 12 | 40034773 | A               | T                       | lof  | C12orf40 | p.K14X     | FALSEE | FALSEE | FALSEE | FALSEE |
| pLOF       | 12 | 40742210 | G               | C                       | lof  | LRRK2    | .          | FALSEE | FALSEE | FALSEE | FALSEE |
| pLOF       | 12 | 40835700 | G               | GTACC                   | lof  | MUC19    | p.Gln685fs | FALSEE | FALSEE | FALSEE | FALSEE |
| pLOF       | 12 | 49170134 | C               | A                       | lof  | ADCY6    | .          | FALSEE | TRUE   | FALSEE | FALSEE |
| dDNV       | 12 | 49663619 | C               | T                       | misD | TUBA1C   | p.R44C     | FALSEE | FALSEE | FALSEE | FALSEE |
| pLOF       | 12 | 50727773 | T               | TG                      | lof  | FAM186A  | p.Q2206fs  | FALSEE | FALSEE | FALSEE | FALSEE |
| pLOF       | 12 | 50835386 | TAAGAG          | T                       | lof  | LARP4    | p.L255fs   | FALSEE | FALSEE | FALSEE | TRUE   |
| pLOF       | 12 | 51279028 | G               | T                       | lof  | TMPRSS12 | .          | FALSEE | FALSEE | FALSEE | FALSEE |
| pLOF       | 12 | 53456906 | CAG             | C                       | lof  | TNS2     | p.T1162fs  | FALSEE | FALSEE | FALSEE | FALSEE |
| pLOF       | 12 | 53701431 | TAAACCGT<br>GGA | T                       | lof  | AAAS     | p.F491fs   | FALSEE | TRUE   | FALSEE | FALSEE |

|               |    |          |                         |    |      |          |            |       |       |       |       |
|---------------|----|----------|-------------------------|----|------|----------|------------|-------|-------|-------|-------|
| pLOF          | 12 | 55886553 | TG                      | T  | lof  | OR6C68   | p.M131fs   | FALSE | FALSE | FALSE | FALSE |
| pLOF          | 12 | 57638387 | G                       | A  | lof  | STAC3    | p.Q247X    | FALSE | FALSE | FALSE | FALSE |
| pLOF          | 12 | 57892220 | AGT<br>GGA<br>ACAC<br>C | A  | lof  | MARS     | p.Q302fs   | FALSE | TRUE  | FALSE | FALSE |
| pLOF          | 12 | 57910957 | AT                      | A  | lof  | DDIT3    | p.E48fs    | FALSE | FALSE | FALSE | TRUE  |
| pLOF          | 12 | 58204710 | C                       | T  | lof  | AVIL     | .          | FALSE | FALSE | FALSE | FALSE |
| pLOF          | 12 | 64509674 | G                       | A  | lof  | SRGAP1   | NA         | FALSE | FALSE | FALSE | TRUE  |
| pLOF          | 12 | 66563708 | G                       | T  | lof  | TMBIM4   | p.Y8X      | FALSE | FALSE | FALSE | FALSE |
| pLOF          | 12 | 80200107 | GGA<br>GC               | G  | lof  | PPP1R12A | p.C553fs   | FALSE | TRUE  | FALSE | TRUE  |
| pLOF          | 12 | 96260916 | GC                      | G  | lof  | CCDC38   | p.Gln543fs | FALSE | FALSE | FALSE | FALSE |
| pLOF          | 12 | 96370453 | CT                      | C  | lof  | HAL      | p.Q562fs   | FALSE | FALSE | FALSE | FALSE |
| pLOF          | 12 | 1.02E+08 | AC                      | A  | lof  | SLC5A8   | p.V197fs   | FALSE | FALSE | FALSE | FALSE |
| pLOF          | 12 | 1.06E+08 | CT                      | C  | lof  | APPL2    | p.K613fs   | FALSE | FALSE | FALSE | FALSE |
| pLOF          | 12 | 1.07E+08 | C                       | T  | lof  | TCP1L2   | p.R500X    | FALSE | FALSE | FALSE | FALSE |
| pLOF          | 12 | 1.07E+08 | G                       | A  | lof  | POLR3B   | .          | FALSE | FALSE | FALSE | FALSE |
| pLOF          | 12 | 1.07E+08 | A                       | G  | lof  | CRY1     | .          | FALSE | FALSE | FALSE | FALSE |
| pLOF          | 12 | 1.1E+08  | CA                      | C  | lof  | UBE3B    | p.T872fs   | FALSE | TRUE  | FALSE | FALSE |
| pLOF          | 12 | 1.14E+08 | G                       | A  | lof  | RASAL1   | p.R472X    | FALSE | FALSE | FALSE | FALSE |
| pLOF          | 12 | 1.15E+08 | C                       | A  | lof  | TBX5     | .          | FALSE | FALSE | FALSE | TRUE  |
| pLOF          | 12 | 1.17E+08 | TC                      | T  | lof  | FBXW8    | p.P342fs   | FALSE | TRUE  | FALSE | FALSE |
| dDNV          | 12 | 1.18E+08 | G                       | A  | misD | KSR2     | p.R689W    | FALSE | FALSE | FALSE | TRUE  |
| pLOF          | 12 | 1.21E+08 | G                       | GA | lof  | UNC119B  | p.K27fs    | FALSE | TRUE  | FALSE | TRUE  |
| dDNV<br>/pLOF | 12 | 1.33E+08 | G                       | A  | lof  | POLE     | p.R1371X   | FALSE | TRUE  | FALSE | FALSE |
| pLOF          | 13 | 28008941 | G                       | A  | lof  | GTF3A    | .          | FALSE | TRUE  | FALSE | FALSE |
| pLOF          | 13 | 32937315 | G                       | C  | lof  | BRCA2    | .          | TRUE  | FALSE | FALSE | FALSE |
| pLOF          | 13 | 36900732 | ACT                     | A  | lof  | SPG20    | p.K422fs   | FALSE | TRUE  | FALSE | FALSE |
| pLOF          | 13 | 41947910 | CT                      | C  | lof  | NAA16    | p.L765fs   | FALSE | FALSE | FALSE | FALSE |

|               |    |              |                                                     |                   |      |                             |                |           |           |           |           |
|---------------|----|--------------|-----------------------------------------------------|-------------------|------|-----------------------------|----------------|-----------|-----------|-----------|-----------|
| pLOF          | 13 | 46627<br>751 | A                                                   | T                 | lof  | CPB2                        | p.X42<br>4K    | FALS<br>E | FALS<br>E | FALS<br>E | FALS<br>E |
| pLOF          | 13 | 46824<br>577 | C                                                   | CTTA<br>GAAT<br>T | lof  | LRRC<br>63                  | p.Phe<br>396fs | FALS<br>E | FALS<br>E | FALS<br>E | FALS<br>E |
| pLOF          | 13 | 52249<br>371 | AC                                                  | A                 | lof  | WDF<br>Y2                   | p.T91<br>fs    | FALS<br>E | FALS<br>E | FALS<br>E | FALS<br>E |
| pLOF          | 13 | 52523<br>865 | GT                                                  | G                 | lof  | ATP7<br>B                   | p.T82<br>2fs   | FALS<br>E | FALS<br>E | FALS<br>E | FALS<br>E |
| pLOF          | 13 | 52684<br>702 | C                                                   | T                 | lof  | NEK5                        | p.W1<br>08X    | FALS<br>E | FALS<br>E | FALS<br>E | FALS<br>E |
| pLOF          | 13 | 73401<br>890 | CTG                                                 | C                 | lof  | PIBF1                       | p.Val<br>313fs | FALS<br>E | FALS<br>E | FALS<br>E | FALS<br>E |
| dDNV<br>/pLOF | 13 | 76123<br>966 | C                                                   | T                 | lof  | UCHL<br>3                   | p.Q4<br>X      | FALS<br>E | TRUE      | FALS<br>E | FALS<br>E |
| pLOF          | 13 | 76195<br>885 | ATG                                                 | A                 | lof  | LMO7                        | p.D19<br>fs    | FALS<br>E | FALS<br>E | FALS<br>E | FALS<br>E |
| pLOF          | 13 | 1.03E<br>+08 | A                                                   | AG                | lof  | CCD<br>C168                 | p.F70<br>15fs  | FALS<br>E | FALS<br>E | FALS<br>E | FALS<br>E |
| pLOF          | 13 | 1.14E<br>+08 | CA                                                  | C                 | lof  | MCF2<br>L                   | p.Ala<br>654fs | FALS<br>E | FALS<br>E | FALS<br>E | FALS<br>E |
| dDNV          | 13 | 1.14E<br>+08 | C                                                   | T                 | misD | TFDP<br>1                   | p.P38<br>9L    | FALS<br>E | TRUE      | FALS<br>E | TRUE      |
| pLOF          | 14 | 23863<br>399 | T                                                   | A                 | lof  | MYH6                        | p.Lys<br>855*  | FALS<br>E | FALS<br>E | FALS<br>E | FALS<br>E |
| dDNV          | 14 | 23874<br>859 | G                                                   | A                 | misD | MYH6                        | p.R10<br>8C    | FALS<br>E | FALS<br>E | FALS<br>E | FALS<br>E |
| pLOF          | 14 | 24683<br>589 | CT                                                  | C                 | lof  | MDP1<br>,NED<br>D8-<br>MDP1 | p.K12<br>7fs   | FALS<br>E | FALS<br>E | FALS<br>E | FALS<br>E |
| pLOF          | 14 | 24780<br>124 | AGG<br>CCT<br>GGC<br>CGC<br>TGG<br>GCC<br>AGG<br>CG | A                 | lof  | LTB4<br>R2                  | p.Q85<br>fs    | FALS<br>E | FALS<br>E | FALS<br>E | FALS<br>E |
| pLOF          | 14 | 24877<br>074 | G                                                   | A                 | lof  | NYN<br>RIN                  | .              | FALS<br>E | TRUE      | FALS<br>E | FALS<br>E |
| pLOF          | 14 | 31771<br>509 | C                                                   | T                 | lof  | HEAT<br>R5A                 | p.W1<br>819X   | FALS<br>E | FALS<br>E | FALS<br>E | FALS<br>E |
| pLOF          | 14 | 31814<br>331 | A                                                   | T                 | lof  | HEAT<br>R5A                 | p.L10<br>07X   | FALS<br>E | FALS<br>E | FALS<br>E | FALS<br>E |
| pLOF          | 14 | 50801<br>301 | A                                                   | AT                | lof  | CDKL<br>1                   | p.P26<br>0fs   | FALS<br>E | FALS<br>E | FALS<br>E | FALS<br>E |
| pLOF          | 14 | 55168<br>778 | A                                                   | G                 | lof  | SAM<br>D4A                  | .              | FALS<br>E | FALS<br>E | FALS<br>E | TRUE      |
| pLOF          | 14 | 59789<br>695 | C                                                   | T                 | lof  | DAA<br>M1                   | p.R17<br>6X    | FALS<br>E | TRUE      | FALS<br>E | TRUE      |
| pLOF          | 14 | 59950<br>733 | CTG                                                 | C                 | lof  | L3HY<br>PDH                 | p.Tyr<br>100fs | FALS<br>E | FALS<br>E | FALS<br>E | FALS<br>E |

|      |    |              |           |                                        |      |             |                |           |           |           |           |
|------|----|--------------|-----------|----------------------------------------|------|-------------|----------------|-----------|-----------|-----------|-----------|
| pLOF | 14 | 69994<br>619 | C         | T                                      | lof  | PLEK<br>HD1 | p.R44<br>1X    | FALS<br>E | FALS<br>E | FALS<br>E | FALS<br>E |
| pLOF | 14 | 76249<br>674 | TC        | T                                      | lof  | TTLL<br>5   | p.H93<br>0fs   | FALS<br>E | FALS<br>E | FALS<br>E | FALS<br>E |
| pLOF | 14 | 77872<br>312 | CT        | C                                      | lof  | NOX<br>RED1 | p.K28<br>3fs   | FALS<br>E | FALS<br>E | FALS<br>E | FALS<br>E |
| pLOF | 14 | 88737<br>118 | TA        | T                                      | lof  | KCNK<br>10  | p.F5fs         | FALS<br>E | FALS<br>E | FALS<br>E | FALS<br>E |
| dDNV | 14 | 90738<br>657 | G         | A                                      | misD | PSM<br>C1   | p.R41<br>0H    | FALS<br>E | TRUE      | FALS<br>E | TRUE      |
| pLOF | 14 | 92537<br>354 | C         | CTG<br>CTG<br>CTG<br>CTG<br>CTG        | lof  | ATXN<br>3   | p.Gly<br>315fs | FALS<br>E | FALS<br>E | FALS<br>E | FALS<br>E |
| pLOF | 14 | 92537<br>354 | C         | CTG<br>CTG<br>CTG<br>CTG<br>CTG<br>CTG | lof  | ATXN<br>3   | p.Gly<br>315fs | FALS<br>E | FALS<br>E | FALS<br>E | FALS<br>E |
| dDNV | 14 | 1.01E<br>+08 | T         | G                                      | misD | WAR<br>S    | p.T12<br>4P    | FALS<br>E | TRUE      | FALS<br>E | FALS<br>E |
| pLOF | 14 | 1.04E<br>+08 | A         | AT                                     | lof  | TDRD<br>9   | p.N63<br>4fs   | FALS<br>E | FALS<br>E | FALS<br>E | FALS<br>E |
| dDNV | 14 | 1.06E<br>+08 | G         | A                                      | misD | JAG2        | p.P54<br>2L    | FALS<br>E | FALS<br>E | FALS<br>E | TRUE      |
| pLOF | 15 | 28211<br>835 | C         | T                                      | lof  | OCA2        | .              | FALS<br>E | FALS<br>E | FALS<br>E | FALS<br>E |
| pLOF | 15 | 40502<br>360 | C         | G                                      | lof  | BUB1<br>B   | p.Y77<br>8X    | FALS<br>E | TRUE      | FALS<br>E | FALS<br>E |
| pLOF | 15 | 40864<br>065 | C         | CT                                     | lof  | RPUS<br>D2  | p.S29<br>0fs   | FALS<br>E | FALS<br>E | FALS<br>E | FALS<br>E |
| pLOF | 15 | 42980<br>923 | C         | T                                      | lof  | STAR<br>D9  | p.Gln<br>2383* | FALS<br>E | FALS<br>E | FALS<br>E | FALS<br>E |
| pLOF | 15 | 43452<br>954 | CT        | C                                      | lof  | TME<br>M62  | p.L42<br>0fs   | FALS<br>E | FALS<br>E | FALS<br>E | FALS<br>E |
| pLOF | 15 | 44067<br>918 | ACCT      | A                                      | lof  | ELL3        | p.E16<br>1fs   | FALS<br>E | FALS<br>E | FALS<br>E | FALS<br>E |
| pLOF | 15 | 44892<br>685 | CTTG<br>A | C                                      | lof  | SPG1<br>1   | p.I122<br>1fs  | FALS<br>E | FALS<br>E | FALS<br>E | FALS<br>E |
| pLOF | 15 | 45965<br>862 | A         | T                                      | lof  | SQR<br>DL   | p.K17<br>3X    | FALS<br>E | FALS<br>E | FALS<br>E | FALS<br>E |
| pLOF | 15 | 51633<br>962 | GGC       | G                                      | lof  | GLDN        | p.Leu<br>29fs  | FALS<br>E | FALS<br>E | FALS<br>E | FALS<br>E |
| pLOF | 15 | 52186<br>011 | G         | C                                      | lof  | TMO<br>D3   | .              | FALS<br>E | TRUE      | FALS<br>E | FALS<br>E |
| pLOF | 15 | 52574<br>978 | C         | A                                      | lof  | MYO<br>5C   | .              | FALS<br>E | FALS<br>E | FALS<br>E | FALS<br>E |
| dDNV | 15 | 52689<br>492 | C         | T                                      | misD | MYO<br>5A   | p.A40<br>9T    | FALS<br>E | TRUE      | TRUE      | TRUE      |
| pLOF | 15 | 56243<br>788 | C         | A                                      | lof  | NED<br>D4   | .              | FALS<br>E | TRUE      | FALS<br>E | FALS<br>E |



|            |    |          |           |                         |      |                      |             |       |       |       |       |
|------------|----|----------|-----------|-------------------------|------|----------------------|-------------|-------|-------|-------|-------|
| dDNV /pLOF | 15 | 65903443 | C         | T                       | lof  | VWA9                 | p.Trp9*     | FALSE | TRUE  | FALSE | FALSE |
| pLOF       | 15 | 66845592 | TCTTC     | T                       | lof  | LCTL                 | p.G308fs    | FALSE | FALSE | FALSE | FALSE |
| pLOF       | 15 | 67652194 | A         | T                       | lof  | IQCH                 | p.R242X     | FALSE | FALSE | FALSE | FALSE |
| pLOF       | 15 | 67813588 | T         | C                       | lof  | C15orf61             | p.Met1?     | FALSE | FALSE | FALSE | FALSE |
| pLOF       | 15 | 69682073 | GC        | G                       | lof  | PAQR5                | p.A156fs    | FALSE | FALSE | FALSE | FALSE |
| pLOF       | 15 | 69745350 | GAC       | G                       | lof  | RPLP1                | p.T22fs     | FALSE | TRUE  | FALSE | FALSE |
| pLOF       | 15 | 74743142 | C         | T                       | lof  | UBL7                 | NA          | FALSE | TRUE  | FALSE | FALSE |
| pLOF       | 15 | 78882254 | TCA       | T                       | lof  | CHRNA5               | p.V174fs    | FALSE | FALSE | FALSE | FALSE |
| pLOF       | 15 | 82563942 | A         | C                       | lof  | SAXO2                | .           | FALSE | FALSE | FALSE | FALSE |
| pLOF       | 15 | 90294294 | G         | GCA                     | lof  | MESP1                | p.R57fs     | FALSE | FALSE | FALSE | FALSE |
| pLOF       | 15 | 90431856 | CCAA<br>T | C                       | lof  | AP3S2,C15orf38-AP3S2 | p.I257fs    | FALSE | FALSE | FALSE | FALSE |
| pLOF       | 15 | 90809010 | C         | CGC<br>GAC<br>CCG       | lof  | NGRN                 | p.Gly26fs   | FALSE | FALSE | FALSE | FALSE |
| pLOF       | 15 | 91304231 | TAGAA     | T                       | lof  | BLM                  | p.L543fs    | FALSE | TRUE  | FALSE | FALSE |
| pLOF       | 15 | 91358377 | CA        | C                       | lof  | BLM                  | p.Ser1375fs | FALSE | TRUE  | FALSE | FALSE |
| pLOF       | 15 | 91434410 | C         | T                       | lof  | FES                  | p.Q507X     | FALSE | FALSE | FALSE | FALSE |
| pLOF       | 15 | 91434410 | C         | T                       | lof  | FES                  | p.Q507X     | FALSE | FALSE | FALSE | FALSE |
| pLOF       | 15 | 91542943 | C         | CA                      | lof  | VPS33B               | p.Glu580fs  | FALSE | FALSE | FALSE | FALSE |
| pLOF       | 15 | 91795123 | C         | T                       | lof  | SV2B                 | p.R176X     | FALSE | FALSE | FALSE | FALSE |
| pLOF       | 15 | 91811837 | T         | G                       | lof  | SV2B                 | .           | FALSE | FALSE | FALSE | FALSE |
| dDNV       | 15 | 93173457 | C         | T                       | misD | FAM174B              | p.D155N     | FALSE | FALSE | FALSE | FALSE |
| pLOF       | 15 | 93198824 | G         | GGG<br>AGC<br>GGC<br>CA | lof  | FAM174B              | p.Ala23fs   | FALSE | FALSE | FALSE | FALSE |
| pLOF       | 15 | 94942216 | T         | G                       | lof  | MCTP2                | p.Y605X     | FALSE | FALSE | FALSE | FALSE |
| pLOF       | 15 | 99251313 | G         | A                       | lof  | IGF1R                | p.W206X     | FALSE | TRUE  | FALSE | TRUE  |

|           |    |          |    |                       |      |          |            |       |       |       |       |
|-----------|----|----------|----|-----------------------|------|----------|------------|-------|-------|-------|-------|
| pLOF      | 15 | 1.02E+08 | C  | T                     | lof  | LRRK1    | p.Q471X    | FALSE | FALSE | FALSE | FALSE |
| pLOF      | 16 | 321537   | A  | G                     | lof  | RGS11    | NA         | FALSE | FALSE | FALSE | FALSE |
| pLOF      | 16 | 708923   | C  | T                     | lof  | WDR90    | p.Q975X    | FALSE | TRUE  | FALSE | FALSE |
| pLOF      | 16 | 732362   | A  | T                     | lof  | STUB1    | .          | FALSE | TRUE  | FALSE | FALSE |
| dDNV/pLOF | 16 | 2139950  | G  | GT                    | lof  | PKD1     | p.N4230fs  | FALSE | FALSE | FALSE | TRUE  |
| pLOF      | 16 | 2809175  | T  | TA                    | lof  | SRRM2    | .          | FALSE | TRUE  | FALSE | TRUE  |
| pLOF      | 16 | 3274302  | G  | A                     | lof  | ZNF200   | p.Q260X    | FALSE | FALSE | FALSE | FALSE |
| pLOF      | 16 | 4852437  | C  | T                     | lof  | ROGDI    | p.W21X     | FALSE | FALSE | FALSE | FALSE |
| pLOF      | 16 | 4934846  | G  | C                     | lof  | PPL      | p.Y1270X   | FALSE | FALSE | FALSE | FALSE |
| dDNV/pLOF | 16 | 4935373  | G  | A                     | lof  | PPL      | p.Q1095X   | FALSE | FALSE | FALSE | FALSE |
| pLOF      | 16 | 10788361 | G  | A                     | lof  | TEKT5    | p.Q124X    | FALSE | FALSE | FALSE | FALSE |
| pLOF      | 16 | 13002408 | G  | A                     | lof  | SHISA9   | p.W212X    | FALSE | FALSE | FALSE | TRUE  |
| pLOF      | 16 | 21983384 | A  | AGCC                  | lof  | UQRC2    | p.S303fs   | FALSE | TRUE  | FALSE | FALSE |
| pLOF      | 16 | 21985269 | C  | CT                    | lof  | UQRC2    | p.T340fs   | FALSE | TRUE  | FALSE | FALSE |
| pLOF      | 16 | 30770379 | CG | C                     | lof  | C16orf93 | p.Pro322fs | FALSE | FALSE | FALSE | FALSE |
| pLOF      | 16 | 31092069 | G  | GGGGGGACTGGGAAATCATAA | lof  | ZNF646   | p.S1475fs  | FALSE | TRUE  | FALSE | FALSE |
| pLOF      | 16 | 31121535 | C  | T                     | lof  | BCKDK    | p.Q145X    | FALSE | TRUE  | TRUE  | FALSE |
| pLOF      | 16 | 46766333 | C  | A                     | lof  | MYLK3    | p.E417X    | FALSE | FALSE | FALSE | FALSE |
| dDNV      | 16 | 46952596 | G  | A                     | misD | GPT2     | p.E322K    | FALSE | FALSE | FALSE | FALSE |
| pLOF      | 16 | 49408002 | T  | C                     | lof  | C16orf78 | .          | FALSE | FALSE | FALSE | FALSE |
| pLOF      | 16 | 50745252 | C  | G                     | lof  | NOD2     | p.S477X    | FALSE | FALSE | FALSE | FALSE |
| pLOF      | 16 | 67323476 | TC | T                     | lof  | KCTD19   | p.Asp926fs | FALSE | FALSE | FALSE | FALSE |
| pLOF      | 16 | 67375953 | T  | A                     | lof  | LRRC36   | p.L55X     | FALSE | FALSE | FALSE | FALSE |
| pLOF      | 16 | 67404851 | G  | GT                    | lof  | LRRC36   | p.L400fs   | FALSE | FALSE | FALSE | FALSE |

|      |    |              |                   |    |      |                  |                     |           |           |           |           |
|------|----|--------------|-------------------|----|------|------------------|---------------------|-----------|-----------|-----------|-----------|
| pLOF | 16 | 67577<br>259 | AG                | A  | lof  | FAM6<br>5A       | p.G83<br>0fs        | FALS<br>E | TRUE      | FALS<br>E | TRUE      |
| pLOF | 16 | 68358<br>622 | AGC<br>AGG<br>GT  | A  | lof  | PRM<br>T7        | p.S57<br>fs         | TRUE      | TRUE      | FALS<br>E | FALS<br>E |
| pLOF | 16 | 69752<br>315 | CA                | C  | lof  | NQO<br>1         | p.Y43<br>X          | FALS<br>E | FALS<br>E | FALS<br>E | FALS<br>E |
| dDNV | 16 | 72110<br>496 | A                 | C  | misD | HPR              | p.Asp<br>225Al<br>a | FALS<br>E | FALS<br>E | FALS<br>E | FALS<br>E |
| pLOF | 16 | 75258<br>741 | C                 | T  | lof  | CTRB<br>1        | p.Q25<br>7X         | FALS<br>E | FALS<br>E | FALS<br>E | FALS<br>E |
| pLOF | 16 | 75662<br>505 | G                 | A  | lof  | KARS             | p.R58<br>1X         | FALS<br>E | TRUE      | FALS<br>E | FALS<br>E |
| pLOF | 16 | 76350<br>368 | CG                | C  | lof  | CNTN<br>AP4      | p.E24<br>fs         | FALS<br>E | FALS<br>E | TRUE      | FALS<br>E |
| pLOF | 16 | 77317<br>885 | G                 | A  | lof  | ADA<br>MTS1<br>8 | p.Q12<br>12X        | FALS<br>E | FALS<br>E | FALS<br>E | FALS<br>E |
| pLOF | 16 | 77323<br>309 | C                 | G  | lof  | ADA<br>MTS1<br>8 | NA                  | FALS<br>E | FALS<br>E | FALS<br>E | FALS<br>E |
| pLOF | 16 | 82034<br>394 | A                 | C  | lof  | SDR4<br>2E1      | .                   | FALS<br>E | FALS<br>E | FALS<br>E | FALS<br>E |
| pLOF | 16 | 82131<br>883 | GC                | G  | lof  | HSD1<br>7B2      | p.A33<br>6fs        | FALS<br>E | FALS<br>E | FALS<br>E | FALS<br>E |
| pLOF | 16 | 82131<br>883 | GC                | G  | lof  | HSD1<br>7B2      | p.A33<br>6fs        | FALS<br>E | FALS<br>E | FALS<br>E | FALS<br>E |
| pLOF | 16 | 84485<br>601 | A                 | T  | lof  | ATP2<br>C2       | p.R57<br>9X         | FALS<br>E | FALS<br>E | FALS<br>E | FALS<br>E |
| pLOF | 16 | 88499<br>538 | CCC<br>ACC<br>CTA | C  | lof  | ZNF4<br>69       | p.T18<br>59fs       | FALS<br>E | FALS<br>E | FALS<br>E | TRUE      |
| pLOF | 16 | 88876<br>854 | A                 | AG | lof  | APRT             | p.S10<br>0fs        | FALS<br>E | TRUE      | FALS<br>E | FALS<br>E |
| pLOF | 16 | 88904<br>097 | AG                | A  | lof  | GALN<br>S        | p.H16<br>6fs        | FALS<br>E | FALS<br>E | FALS<br>E | FALS<br>E |
| pLOF | 16 | 88931<br>528 | G                 | T  | lof  | PABP<br>N1L      | p.Tyr<br>156*       | FALS<br>E | FALS<br>E | FALS<br>E | FALS<br>E |
| pLOF | 16 | 89986<br>342 | A                 | T  | lof  | MC1<br>R         | p.Lys<br>226*       | FALS<br>E | FALS<br>E | FALS<br>E | FALS<br>E |
| pLOF | 17 | 69480<br>1   | TGCT<br>CCG<br>G  | T  | lof  | RNM<br>TL1       | p.V25<br>2fs        | FALS<br>E | FALS<br>E | FALS<br>E | FALS<br>E |
| pLOF | 17 | 16128<br>05  | A                 | T  | lof  | TLCD<br>2        | p.C11<br>0X         | FALS<br>E | FALS<br>E | FALS<br>E | FALS<br>E |
| pLOF | 17 | 16128<br>05  | A                 | T  | lof  | TLCD<br>2        | p.C11<br>0X         | FALS<br>E | FALS<br>E | FALS<br>E | FALS<br>E |
| pLOF | 17 | 22212<br>10  | T                 | A  | lof  | SRR              | p.L72<br>X          | FALS<br>E | FALS<br>E | FALS<br>E | FALS<br>E |
| dDNV | 17 | 25985<br>35  | G                 | A  | misD | CLUH             | p.H82<br>3Y         | FALS<br>E | TRUE      | FALS<br>E | TRUE      |
| pLOF | 17 | 33434<br>43  | A                 | C  | lof  | SPAT<br>A22      | p.X36<br>4E         | FALS<br>E | FALS<br>E | FALS<br>E | FALS<br>E |

|           |    |          |     |         |     |              |           |       |       |       |       |
|-----------|----|----------|-----|---------|-----|--------------|-----------|-------|-------|-------|-------|
| pLOF      | 17 | 3438930  | CG  | C       | lof | TRPV3        | p.D240fs  | FALSE | FALSE | FALSE | FALSE |
| pLOF      | 17 | 3808158  | G   | T       | lof | P2RX1        | p.C117X   | FALSE | FALSE | FALSE | FALSE |
| pLOF      | 17 | 4863614  | C   | T       | lof | SPAG7        | .         | FALSE | TRUE  | FALSE | FALSE |
| pLOF      | 17 | 5126610  | A   | G       | lof | RP11-333E1.1 | NA        | FALSE | FALSE | FALSE | FALSE |
| pLOF      | 17 | 5314065  | AT  | A       | lof | NUP88        | p.I213fs  | FALSE | TRUE  | FALSE | FALSE |
| pLOF      | 17 | 10219265 | CTG | C       | lof | MYH13        | p.Q1272fs | FALSE | FALSE | FALSE | FALSE |
| pLOF      | 17 | 11757318 | A   | G       | lof | DNAH9        | .         | FALSE | FALSE | FALSE | FALSE |
| pLOF      | 17 | 11757746 | G   | C       | lof | DNAH9        | .         | FALSE | FALSE | FALSE | FALSE |
| pLOF      | 17 | 16330045 | C   | T       | lof | TRPV2        | p.R369X   | FALSE | FALSE | FALSE | FALSE |
| pLOF      | 17 | 19284454 | CAG | C       | lof | MAPK7        | p.T311fs  | FALSE | TRUE  | FALSE | FALSE |
| pLOF      | 17 | 19698933 | A   | T       | lof | ULK2         | .         | FALSE | FALSE | FALSE | FALSE |
| pLOF      | 17 | 20200305 | G   | A       | lof | SPEC1        | p.W991X   | FALSE | FALSE | FALSE | FALSE |
| pLOF      | 17 | 28601136 | T   | TA      | lof | BLMH         | p.Y242fs  | FALSE | TRUE  | FALSE | FALSE |
| pLOF      | 17 | 33497167 | C   | T       | lof | UNC45B       | p.R528X   | FALSE | FALSE | FALSE | FALSE |
| dDNV/pLOF | 17 | 33592485 | C   | T       | lof | SLFN5        | p.Q752X   | FALSE | FALSE | FALSE | FALSE |
| pLOF      | 17 | 33806192 | CT  | C       | lof | SLFN12L      | p.R346fs  | FALSE | FALSE | FALSE | FALSE |
| pLOF      | 17 | 35830637 | G   | A       | lof | TADA2A       | NA        | TRUE  | TRUE  | FALSE | FALSE |
| pLOF      | 17 | 36486756 | AG  | A       | lof | GPR179       | p.L899fs  | FALSE | FALSE | FALSE | FALSE |
| pLOF      | 17 | 39135216 | G   | A       | lof | KRT40        | p.Q346X   | FALSE | FALSE | FALSE | FALSE |
| pLOF      | 17 | 39183406 | A   | G       | lof | KRTA1-5      | p.Met1?   | FALSE | FALSE | FALSE | FALSE |
| pLOF      | 17 | 39645871 | GC  | G       | lof | KRT36        | p.G82fs   | FALSE | FALSE | FALSE | FALSE |
| pLOF      | 17 | 39967718 | G   | T       | lof | P3H4         | p.Y150X   | FALSE | FALSE | FALSE | FALSE |
| pLOF      | 17 | 40259709 | C   | CGG TGT | lof | DHX58        | p.A304fs  | FALSE | FALSE | FALSE | FALSE |
| pLOF      | 17 | 40271595 | G   | A       | lof | KAT2A        | p.Q281X   | TRUE  | TRUE  | FALSE | TRUE  |
| pLOF      | 17 | 41164211 | C   | T       | lof | IFI35        | p.Q13X    | FALSE | FALSE | FALSE | FALSE |
| pLOF      | 17 | 41570095 | C   | T       | lof | DHX8         | p.R184X   | FALSE | TRUE  | FALSE | FALSE |

|               |    |              |                                                                                   |                          |      |                            |                      |           |           |           |           |
|---------------|----|--------------|-----------------------------------------------------------------------------------|--------------------------|------|----------------------------|----------------------|-----------|-----------|-----------|-----------|
| pLOF          | 17 | 46620<br>757 | CG                                                                                | C                        | lof  | HOX<br>B2                  | p.Pro<br>248fs       | FALS<br>E | FALS<br>E | FALS<br>E | FALS<br>E |
| pLOF          | 17 | 46628<br>464 | CCC<br>GCC<br>GCC<br>GCC<br>ACC<br>GCC<br>CCC<br>GCT<br>GCC<br>ACCA<br>CTG<br>CCT | C                        | lof  | HOX<br>B3                  | p.Gly<br>90fs        | FALS<br>E | FALS<br>E | FALS<br>E | TRUE      |
| pLOF          | 17 | 47014<br>397 | T                                                                                 | A                        | lof  | SNF8                       | p.K11<br>2X          | FALS<br>E | FALS<br>E | FALS<br>E | FALS<br>E |
| pLOF          | 17 | 47219<br>506 | C                                                                                 | T                        | lof  | B4GA<br>LNT2               | p.Q16<br>9X          | FALS<br>E | FALS<br>E | FALS<br>E | FALS<br>E |
| pLOF          | 17 | 48452<br>656 | A                                                                                 | AC                       | lof  | EME1                       | p.E29<br>fs          | FALS<br>E | TRUE      | FALS<br>E | FALS<br>E |
| dDNV          | 17 | 48761<br>349 | A                                                                                 | G                        | misD | ABCC<br>3                  | p.Met<br>1332<br>Val | FALS<br>E | FALS<br>E | FALS<br>E | FALS<br>E |
| pLOF          | 17 | 49238<br>569 | G                                                                                 | T                        | lof  | NME1<br>,NME<br>1-<br>NME2 | p.E11<br>8X          | FALS<br>E | FALS<br>E | FALS<br>E | FALS<br>E |
| pLOF          | 17 | 52993<br>152 | C                                                                                 | T                        | lof  | TOM1<br>L1                 | p.R21<br>7X          | FALS<br>E | FALS<br>E | FALS<br>E | FALS<br>E |
| pLOF          | 17 | 53026<br>951 | CAG                                                                               | C                        | lof  | TOM1<br>L1                 | p.Q41<br>9fs         | FALS<br>E | FALS<br>E | FALS<br>E | FALS<br>E |
| pLOF          | 17 | 54893<br>116 | C                                                                                 | G                        | lof  | C17or<br>f67               | .                    | FALS<br>E | FALS<br>E | FALS<br>E | FALS<br>E |
| pLOF          | 17 | 56355<br>363 | G                                                                                 | T                        | lof  | MPO                        | p.Y34<br>3X          | FALS<br>E | FALS<br>E | FALS<br>E | FALS<br>E |
| pLOF          | 17 | 56357<br>349 | G                                                                                 | GAG<br>CCG<br>CTG<br>CGA | lof  | MPO                        | p.S92<br>fs          | FALS<br>E | FALS<br>E | FALS<br>E | FALS<br>E |
| pLOF          | 17 | 58156<br>125 | C                                                                                 | A                        | lof  | HEAT<br>R6                 | p.E51<br>X           | FALS<br>E | FALS<br>E | FALS<br>E | FALS<br>E |
| dDNV          | 17 | 61557<br>725 | G                                                                                 | A                        | misD | ACE                        | 0                    | FALS<br>E | FALS<br>E | FALS<br>E | FALS<br>E |
| dDNV<br>/pLOF | 17 | 61759<br>225 | A                                                                                 | AG                       | lof  | MAP3<br>K3                 | p.E23<br>2fs         | FALS<br>E | TRUE      | FALS<br>E | TRUE      |
| dDNV<br>/pLOF | 17 | 62558<br>993 | G                                                                                 | A                        | lof  | SMU<br>RF2                 | p.R37<br>0X          | FALS<br>E | TRUE      | FALS<br>E | TRUE      |
| pLOF          | 17 | 66992<br>092 | C                                                                                 | CA                       | lof  | ABCA<br>9                  | p.G11<br>67fs        | FALS<br>E | FALS<br>E | FALS<br>E | FALS<br>E |
| pLOF          | 17 | 67189<br>740 | ATAA<br>T                                                                         | A                        | lof  | ABCA<br>10                 | p.I511<br>fs         | FALS<br>E | FALS<br>E | FALS<br>E | FALS<br>E |

|               |    |              |                                 |                                                               |      |             |                                                                             |           |           |           |           |
|---------------|----|--------------|---------------------------------|---------------------------------------------------------------|------|-------------|-----------------------------------------------------------------------------|-----------|-----------|-----------|-----------|
| pLOF          | 17 | 73489<br>944 | C                               | CCA                                                           | lof  | TME<br>M94  | p.P78<br>5fs                                                                | FALS<br>E | FALS<br>E | FALS<br>E | FALS<br>E |
| pLOF          | 17 | 73570<br>751 | T                               | TG                                                            | lof  | LLGL<br>2   | .                                                                           | FALS<br>E | FALS<br>E | FALS<br>E | FALS<br>E |
| pLOF          | 17 | 73953<br>636 | G                               | A                                                             | lof  | ACO<br>X1   | p.R14<br>8X                                                                 | FALS<br>E | FALS<br>E | FALS<br>E | FALS<br>E |
| pLOF          | 17 | 76566<br>381 | GGT                             | G                                                             | lof  | DNA<br>H17  | p.Pro<br>331fs                                                              | FALS<br>E | FALS<br>E | FALS<br>E | FALS<br>E |
| pLOF          | 17 | 76676<br>428 | T                               | C                                                             | lof  | CYTH<br>1   | .                                                                           | FALS<br>E | FALS<br>E | FALS<br>E | TRUE      |
| pLOF          | 17 | 76823<br>301 | G                               | A                                                             | lof  | USP3<br>6   | p.Gln<br>239*                                                               | FALS<br>E | FALS<br>E | FALS<br>E | FALS<br>E |
| pLOF          | 17 | 77708<br>889 | C                               | G                                                             | lof  | ENPP<br>7   | p.Tyr<br>149*                                                               | FALS<br>E | FALS<br>E | FALS<br>E | FALS<br>E |
| pLOF          | 17 | 78064<br>032 | A                               | ACGT<br>GCA<br>CGA<br>ACAA<br>CAC<br>GGG<br>ACG<br>CGC<br>GCG | lof  | CCD<br>C40  | p.Gln<br>976fs                                                              | FALS<br>E | FALS<br>E | FALS<br>E | FALS<br>E |
| pLOF          | 17 | 78286<br>962 | A                               | AT                                                            | lof  | RNF2<br>13  | p.I936<br>fs                                                                | FALS<br>E | FALS<br>E | FALS<br>E | FALS<br>E |
| pLOF          | 17 | 78399<br>347 | GGA                             | G                                                             | lof  | END<br>OV   | p.R21<br>4fs                                                                | FALS<br>E | FALS<br>E | FALS<br>E | FALS<br>E |
| pLOF          | 17 | 80010<br>276 | GGC<br>ACG<br>GCC<br>GGG<br>GAC | G                                                             | lof  | GPS1        | p.G32<br>fs                                                                 | FALS<br>E | TRUE      | FALS<br>E | TRUE      |
| pLOF          | 18 | 19236<br>850 | AG                              | A                                                             | lof  | ABHD<br>3   | p.S34<br>3fs                                                                | FALS<br>E | FALS<br>E | FALS<br>E | FALS<br>E |
| dDNV<br>/pLOF | 18 | 19751<br>617 | ACT                             | A                                                             | lof  | GATA<br>6   | GATA<br>6:NM<br>_0052<br>57:ex<br>on2:c.<br>513_5<br>14del:<br>p.H17<br>1fs | FALS<br>E | FALS<br>E | FALS<br>E | TRUE      |
| pLOF          | 18 | 19751<br>617 | ACT                             | A                                                             | lof  | GATA<br>6   | p.Ser<br>172fs                                                              | FALS<br>E | FALS<br>E | FALS<br>E | TRUE      |
| dDNV          | 18 | 21110<br>376 | T                               | C                                                             | misD | C18or<br>f8 | p.I565<br>T                                                                 | FALS<br>E | FALS<br>E | FALS<br>E | TRUE      |
| pLOF          | 18 | 21496<br>564 | C                               | T                                                             | lof  | LAMA<br>3   | p.Arg<br>2610*                                                              | FALS<br>E | FALS<br>E | FALS<br>E | FALS<br>E |
| pLOF          | 18 | 21736<br>416 | TA                              | T                                                             | lof  | CABY<br>R   | p.I318<br>fs                                                                | FALS<br>E | FALS<br>E | FALS<br>E | FALS<br>E |
| pLOF          | 18 | 28612<br>216 | G                               | T                                                             | lof  | DSC3        | p.Cys<br>32*                                                                | FALS<br>E | FALS<br>E | FALS<br>E | FALS<br>E |
| pLOF          | 18 | 28667<br>778 | T                               | C                                                             | lof  | DSC2        | .                                                                           | FALS<br>E | FALS<br>E | FALS<br>E | FALS<br>E |

|               |    |              |                                 |    |      |                  |                |           |           |           |           |
|---------------|----|--------------|---------------------------------|----|------|------------------|----------------|-----------|-----------|-----------|-----------|
| dDNV          | 18 | 29116<br>237 | T                               | A  | misD | DSG2             | p.L49<br>9Q    | FALS<br>E | FALS<br>E | FALS<br>E | FALS<br>E |
| dDNV          | 18 | 32400<br>761 | C                               | T  | misD | DTNA             | p.P29<br>5S    | FALS<br>E | FALS<br>E | FALS<br>E | TRUE      |
| pLOF          | 18 | 32585<br>514 | C                               | G  | lof  | MAP<br>RE2       | p.S28<br>X     | FALS<br>E | TRUE      | FALS<br>E | TRUE      |
| pLOF          | 18 | 32720<br>304 | C                               | T  | lof  | MAP<br>RE2       | p.Q30<br>7X    | FALS<br>E | TRUE      | FALS<br>E | TRUE      |
| pLOF          | 18 | 33558<br>882 | GTTA<br>C                       | G  | lof  | C18or<br>f21     | p.L19<br>3fs   | FALS<br>E | FALS<br>E | FALS<br>E | FALS<br>E |
| pLOF          | 18 | 34359<br>413 | C                               | T  | lof  | FHO<br>D3        | p.R15<br>97X   | FALS<br>E | TRUE      | FALS<br>E | FALS<br>E |
| pLOF          | 18 | 34740<br>228 | AC                              | A  | lof  | KIAA<br>1328     | p.D43<br>3fs   | FALS<br>E | TRUE      | FALS<br>E | FALS<br>E |
| dDNV<br>/pLOF | 18 | 45374<br>845 | C                               | T  | lof  | SMA<br>D2        | NA             | FALS<br>E | TRUE      | FALS<br>E | TRUE      |
| pLOF          | 18 | 47432<br>872 | TC                              | T  | lof  | MYO<br>5B        | p.Gly<br>777fs | FALS<br>E | FALS<br>E | FALS<br>E | FALS<br>E |
| pLOF          | 18 | 47777<br>259 | G                               | A  | lof  | CFAP<br>53       | p.Q28<br>9X    | FALS<br>E | FALS<br>E | FALS<br>E | FALS<br>E |
| pLOF          | 18 | 53252<br>953 | A                               | G  | lof  | TCF4             | NA             | FALS<br>E | TRUE      | TRUE      | TRUE      |
| pLOF          | 18 | 61600<br>279 | TAGA<br>C                       | T  | lof  | SERP<br>INB10    | p.T21<br>2fs   | FALS<br>E | FALS<br>E | FALS<br>E | FALS<br>E |
| dDNV<br>/pLOF | 18 | 72347<br>212 | C                               | T  | lof  | ZNF4<br>07       | p.R14<br>13X   | FALS<br>E | FALS<br>E | FALS<br>E | TRUE      |
| pLOF          | 18 | 76754<br>984 | GC                              | G  | lof  | SALL<br>3        | p.S99<br>8fs   | FALS<br>E | FALS<br>E | FALS<br>E | FALS<br>E |
| pLOF          | 18 | 77474<br>559 | C                               | T  | lof  | CTDP<br>1        | p.Gln<br>367*  | FALS<br>E | TRUE      | FALS<br>E | FALS<br>E |
| pLOF          | 19 | 68136<br>9   | C                               | A  | lof  | FSTL<br>3        | p.Ser<br>181*  | FALS<br>E | FALS<br>E | FALS<br>E | TRUE      |
| pLOF          | 19 | 87105<br>6   | G                               | A  | lof  | MED1<br>6        | p.Q76<br>6X    | FALS<br>E | TRUE      | FALS<br>E | FALS<br>E |
| pLOF          | 19 | 10446<br>61  | AC                              | A  | lof  | ABCA<br>7        | p.Pro<br>379fs | FALS<br>E | FALS<br>E | FALS<br>E | FALS<br>E |
| pLOF          | 19 | 35479<br>05  | CA                              | C  | lof  | MFS<br>D12       | p.Ala<br>260fs | FALS<br>E | FALS<br>E | FALS<br>E | FALS<br>E |
| pLOF          | 19 | 38168<br>29  | TG                              | T  | lof  | ZFR2             | p.Q64<br>9fs   | FALS<br>E | FALS<br>E | FALS<br>E | FALS<br>E |
| pLOF          | 19 | 61772<br>62  | T                               | TC | lof  | ACSB<br>G2       | p.V25<br>4fs   | FALS<br>E | FALS<br>E | FALS<br>E | FALS<br>E |
| pLOF          | 19 | 69086<br>99  | G                               | A  | lof  | ADG<br>RE1       | .              | FALS<br>E | FALS<br>E | FALS<br>E | FALS<br>E |
| pLOF          | 19 | 75052<br>32  | TCG<br>CTCA<br>AGG<br>AGC<br>AC | T  | lof  | ARH<br>GEF1<br>8 | p.S13<br>6fs   | FALS<br>E | FALS<br>E | FALS<br>E | FALS<br>E |
| pLOF          | 19 | 76910<br>20  | A                               | G  | lof  | XAB2             | .              | FALS<br>E | TRUE      | FALS<br>E | TRUE      |
| pLOF          | 19 | 79991<br>24  | C                               | A  | lof  | TIMM<br>44       | .              | FALS<br>E | TRUE      | FALS<br>E | FALS<br>E |

|            |    |          |     |     |     |          |           |       |       |       |       |
|------------|----|----------|-----|-----|-----|----------|-----------|-------|-------|-------|-------|
| pLOF       | 19 | 9054234  | C   | A   | lof | MUC16    | .         | FALSE | FALSE | FALSE | FALSE |
| pLOF       | 19 | 10124273 | C   | T   | lof | RDH8     | p.Q54X    | FALSE | FALSE | FALSE | FALSE |
| pLOF       | 19 | 11215894 | A   | C   | lof | LDLR     | .         | FALSE | FALSE | FALSE | FALSE |
| pLOF       | 19 | 11686002 | TG  | T   | lof | ACP5     | p.S267X   | FALSE | FALSE | FALSE | FALSE |
| pLOF       | 19 | 12880697 | G   | A   | lof | HOO K2   | p.Gln368* | FALSE | FALSE | FALSE | FALSE |
| pLOF       | 19 | 13080596 | G   | A   | lof | DAN D5   | p.W41X    | FALSE | FALSE | FALSE | FALSE |
| pLOF       | 19 | 13135494 | C   | CGT | lof | NFIX     | p.A16fs   | FALSE | FALSE | TRUE  | TRUE  |
| pLOF       | 19 | 13882967 | A   | AC  | lof | MRI1     | p.T281fs  | FALSE | FALSE | FALSE | FALSE |
| pLOF       | 19 | 14867079 | C   | T   | lof | ADGRE2   | p.W388X   | FALSE | FALSE | FALSE | FALSE |
| pLOF       | 19 | 16025185 | AG  | A   | lof | CYP4F11  | p.P442fs  | FALSE | FALSE | FALSE | FALSE |
| pLOF       | 19 | 16861144 | AC  | A   | lof | NWD1     | p.H429fs  | FALSE | FALSE | FALSE | FALSE |
| pLOF       | 19 | 17759726 | C   | A   | lof | UNC13A   | p.E531X   | FALSE | FALSE | FALSE | TRUE  |
| pLOF       | 19 | 17831358 | C   | T   | lof | MAP1S    | p.Arg65*  | FALSE | TRUE  | FALSE | FALSE |
| pLOF       | 19 | 18284739 | C   | T   | lof | IFI30    | p.Q30X    | FALSE | FALSE | FALSE | FALSE |
| pLOF       | 19 | 18979514 | G   | T   | lof | GDF1     | p.C337X   | FALSE | FALSE | FALSE | FALSE |
| pLOF       | 19 | 21607218 | C   | G   | lof | ZNF493   | p.S586X   | FALSE | FALSE | FALSE | FALSE |
| pLOF       | 19 | 35451829 | G   | A   | lof | ZNF792   | p.Gln35*  | FALSE | FALSE | FALSE | FALSE |
| pLOF       | 19 | 35514188 | G   | A   | lof | GRAMD1A  | p.W634X   | FALSE | TRUE  | FALSE | FALSE |
| pLOF       | 19 | 36340248 | CAG | C   | lof | NPHS1    | p.P243fs  | FALSE | FALSE | FALSE | FALSE |
| pLOF       | 19 | 36342694 | G   | GCC | lof | NPHS1    | p.L16fs   | FALSE | FALSE | FALSE | FALSE |
| pLOF       | 19 | 36558868 | C   | T   | lof | WDR62    | p.Q280X   | FALSE | FALSE | FALSE | FALSE |
| pLOF       | 19 | 36643294 | C   | T   | lof | COX7A1   | .         | FALSE | FALSE | FALSE | FALSE |
| pLOF       | 19 | 37917191 | AT  | A   | lof | ZNF569   | p.N35fs   | FALSE | FALSE | FALSE | FALSE |
| dDNV /pLOF | 19 | 38853114 | C   | G   | lof | CATSPERG | p.Y752X   | FALSE | FALSE | FALSE | FALSE |
| pLOF       | 19 | 38853130 | AT  | A   | lof | CATSPERG | p.I758fs  | FALSE | FALSE | FALSE | FALSE |
| pLOF       | 19 | 38873900 | G   | A   | lof | PSMD8    | p.Trp308* | FALSE | TRUE  | FALSE | FALSE |



|      |    |              |     |                   |      |              |                |           |           |           |           |
|------|----|--------------|-----|-------------------|------|--------------|----------------|-----------|-----------|-----------|-----------|
| pLOF | 19 | 38885<br>396 | GC  | G                 | lof  | SPRE<br>D3   | p.P18<br>0fs   | FALS<br>E | FALS<br>E | FALS<br>E | FALS<br>E |
| pLOF | 19 | 38897<br>596 | TTC | T                 | lof  | FAM9<br>8C   | p.V26<br>6fs   | FALS<br>E | FALS<br>E | FALS<br>E | FALS<br>E |
| pLOF | 19 | 39096<br>371 | C   | T                 | lof  | MAP4<br>K1   | .              | FALS<br>E | FALS<br>E | FALS<br>E | TRUE      |
| pLOF | 19 | 39669<br>106 | C   | T                 | lof  | PAK4         | p.R55<br>5X    | FALS<br>E | TRUE      | FALS<br>E | FALS<br>E |
| pLOF | 19 | 39688<br>691 | A   | G                 | lof  | NCC<br>RP1   | .              | FALS<br>E | FALS<br>E | FALS<br>E | FALS<br>E |
| pLOF | 19 | 39971<br>376 | TG  | T                 | lof  | TIMM<br>50   | p.G65<br>fs    | FALS<br>E | TRUE      | FALS<br>E | FALS<br>E |
| pLOF | 19 | 40478<br>298 | TC  | T                 | lof  | PSM<br>C4    | p.F53<br>fs    | FALS<br>E | TRUE      | FALS<br>E | FALS<br>E |
| pLOF | 19 | 40902<br>869 | G   | A                 | lof  | PRX          | p.Arg<br>464*  | FALS<br>E | FALS<br>E | FALS<br>E | FALS<br>E |
| dDNV | 19 | 41928<br>260 | C   | T                 | misD | BCKD<br>HA   | p.R28<br>0C    | FALS<br>E | FALS<br>E | FALS<br>E | FALS<br>E |
| pLOF | 19 | 42820<br>662 | TG  | T                 | lof  | TME<br>M145  | p.Gly<br>227fs | FALS<br>E | FALS<br>E | FALS<br>E | FALS<br>E |
| pLOF | 19 | 44118<br>000 | G   | GC                | lof  | SRR<br>M5    | p.S57<br>6fs   | FALS<br>E | FALS<br>E | FALS<br>E | FALS<br>E |
| pLOF | 19 | 45295<br>751 | T   | TGCT<br>GCC<br>TG | lof  | CBLC         | p.C37<br>3fs   | FALS<br>E | FALS<br>E | FALS<br>E | FALS<br>E |
| pLOF | 19 | 45912<br>350 | AG  | A                 | lof  | CD3E<br>AP   | p.Q37<br>5fs   | FALS<br>E | TRUE      | FALS<br>E | FALS<br>E |
| pLOF | 19 | 46299<br>133 | ATC | A                 | lof  | RSPH<br>6A   | p.D71<br>6fs   | FALS<br>E | FALS<br>E | FALS<br>E | FALS<br>E |
| pLOF | 19 | 47549<br>896 | C   | CCC<br>CGAT<br>G  | lof  | TME<br>M160  | p.V86<br>fs    | FALS<br>E | FALS<br>E | FALS<br>E | FALS<br>E |
| pLOF | 19 | 48950<br>092 | C   | T                 | lof  | GRW<br>D1    | p.R15<br>4X    | FALS<br>E | TRUE      | FALS<br>E | FALS<br>E |
| pLOF | 19 | 48953<br>589 | AGC | A                 | lof  | GRW<br>D1    | p.E16<br>3fs   | FALS<br>E | TRUE      | FALS<br>E | FALS<br>E |
| pLOF | 19 | 48953<br>589 | AGC | A                 | lof  | GRW<br>D1    | p.Glu<br>163fs | FALS<br>E | TRUE      | FALS<br>E | FALS<br>E |
| pLOF | 19 | 49963<br>000 | C   | T                 | lof  | ALDH<br>16A1 | p.R13<br>2X    | FALS<br>E | TRUE      | FALS<br>E | FALS<br>E |
| pLOF | 19 | 51955<br>787 | GT  | G                 | lof  | SIGL<br>EC8  | p.T44<br>9fs   | FALS<br>E | FALS<br>E | FALS<br>E | FALS<br>E |
| pLOF | 19 | 53304<br>400 | TG  | T                 | lof  | ZNF2<br>8    | p.H23<br>3fs   | FALS<br>E | TRUE      | FALS<br>E | FALS<br>E |
| pLOF | 19 | 55175<br>352 | A   | T                 | lof  | LILRB<br>4   | p.R71<br>X     | FALS<br>E | FALS<br>E | FALS<br>E | FALS<br>E |
| pLOF | 19 | 55525<br>985 | GA  | G                 | lof  | GP6          | p.S44<br>3fs   | FALS<br>E | FALS<br>E | FALS<br>E | FALS<br>E |
| pLOF | 19 | 55823<br>281 | G   | T                 | lof  | BRSK<br>1    | p.E72<br>8X    | FALS<br>E | FALS<br>E | FALS<br>E | TRUE      |
| pLOF | 19 | 56005<br>093 | C   | T                 | lof  | SSC5<br>D    | p.R34<br>3X    | FALS<br>E | FALS<br>E | FALS<br>E | FALS<br>E |
| pLOF | 19 | 57835<br>102 | GA  | G                 | lof  | ZNF5<br>43   | p.G24<br>fs    | FALS<br>E | FALS<br>E | FALS<br>E | FALS<br>E |

|               |    |          |                        |     |     |              |                    |           |           |           |           |
|---------------|----|----------|------------------------|-----|-----|--------------|--------------------|-----------|-----------|-----------|-----------|
| pLOF          | 19 | 57985062 | G                      | GT  | lof | ZNF772       | p.Y350_K351delinsX | FALS<br>E | FALS<br>E | FALS<br>E | FALS<br>E |
| pLOF          | 20 | 2375100  | AT                     | A   | lof | TGM6         | p.I4fs             | FALS<br>E | FALS<br>E | FALS<br>E | FALS<br>E |
| pLOF          | 20 | 3543875  | C                      | T   | lof | ATRN         | p.R551X            | FALS<br>E | FALS<br>E | FALS<br>E | TRUE      |
| pLOF          | 20 | 3758910  | C                      | CCG | lof | SPEF1        | p.R220fs           | FALS<br>E | FALS<br>E | FALS<br>E | FALS<br>E |
| pLOF          | 20 | 3758927  | G                      | A   | lof | SPEF1        | p.Gln215*          | FALS<br>E | FALS<br>E | FALS<br>E | FALS<br>E |
| pLOF          | 20 | 5283357  | T                      | A   | lof | PROKR2       | p.K162X            | FALS<br>E | FALS<br>E | FALS<br>E | FALS<br>E |
| pLOF          | 20 | 6021974  | G                      | GT  | lof | LRRN4        | p.Y639_G640delinsX | FALS<br>E | FALS<br>E | FALS<br>E | FALS<br>E |
| pLOF          | 20 | 13763572 | TA                     | T   | lof | ESF1         | p.Tyr72fs          | FALS<br>E | TRUE      | FALS<br>E | FALS<br>E |
| pLOF          | 20 | 17937639 | G                      | A   | lof | SNX5         | p.Q32X             | FALS<br>E | TRUE      | TRUE      | FALS<br>E |
| pLOF          | 20 | 31494648 | GTGAC                  | G   | lof | EFCAB8       | p.Thr387fs         | FALS<br>E | FALS<br>E | FALS<br>E | FALS<br>E |
| pLOF          | 20 | 33329542 | TTTA<br>A              | T   | lof | NCOA6        | p.I1505fs          | FALS<br>E | TRUE      | FALS<br>E | TRUE      |
| pLOF          | 20 | 34085825 | CTGT<br>T              | C   | lof | CEP250       | p.S1195fs          | FALS<br>E | TRUE      | FALS<br>E | FALS<br>E |
| pLOF          | 20 | 34828403 | G                      | T   | lof | AAR2         | p.E205X            | FALS<br>E | TRUE      | FALS<br>E | FALS<br>E |
| pLOF          | 20 | 35173466 | CGC<br>TGG<br>GTG<br>A | C   | lof | MYL9         | p.S60fs            | FALS<br>E | FALS<br>E | FALS<br>E | FALS<br>E |
| pLOF          | 20 | 36789985 | CCTC<br>T              | C   | lof | TGM2         | p.E8fs             | FALS<br>E | FALS<br>E | FALS<br>E | FALS<br>E |
| pLOF          | 20 | 37263370 | CTG                    | C   | lof | ARH<br>GAP40 | p.C297fs           | FALS<br>E | FALS<br>E | FALS<br>E | FALS<br>E |
| pLOF          | 20 | 39832029 | T                      | A   | lof | ZHX3         | p.K510X            | FALS<br>E | FALS<br>E | FALS<br>E | FALS<br>E |
| pLOF          | 20 | 44640253 | C                      | A   | lof | MMP9         | p.C288X            | FALS<br>E | FALS<br>E | FALS<br>E | FALS<br>E |
| pLOF          | 20 | 47846805 | GC                     | G   | lof | DDX27        | p.G348fs           | FALS<br>E | TRUE      | FALS<br>E | TRUE      |
| dDNV<br>/pLOF | 20 | 52198777 | C                      | CT  | lof | ZNF217       | p.A197fs           | FALS<br>E | FALS<br>E | FALS<br>E | TRUE      |
| pLOF          | 20 | 52775630 | AT                     | A   | lof | CYP24A1      | p.N341fs           | FALS<br>E | FALS<br>E | FALS<br>E | FALS<br>E |
| pLOF          | 20 | 55059207 | C                      | T   | lof | RTFD<br>C1   | p.R177X            | FALS<br>E | TRUE      | FALS<br>E | FALS<br>E |
| pLOF          | 20 | 57582065 | T                      | TC  | lof | CTSZ         | p.D40fs            | FALS<br>E | TRUE      | FALS<br>E | FALS<br>E |

|               |    |              |                  |    |      |             |               |           |           |           |           |
|---------------|----|--------------|------------------|----|------|-------------|---------------|-----------|-----------|-----------|-----------|
| pLOF          | 20 | 61953<br>465 | T                | C  | lof  | COL2<br>0A1 | NA            | FALS<br>E | FALS<br>E | FALS<br>E | FALS<br>E |
| pLOF          | 20 | 62333<br>571 | T                | G  | lof  | ARFR<br>P1  | NA            | FALS<br>E | TRUE      | FALS<br>E | FALS<br>E |
| pLOF          | 21 | 15558<br>287 | A                | AT | lof  | LIPI        | p.I200<br>fs  | FALS<br>E | FALS<br>E | FALS<br>E | FALS<br>E |
| pLOF          | 21 | 30415<br>806 | TAGT<br>G        | T  | lof  | USP1<br>6   | p.S41<br>5fs  | TRUE      | FALS<br>E | FALS<br>E | FALS<br>E |
| pLOF          | 21 | 30715<br>007 | TG               | T  | lof  | BACH<br>1   | p.E68<br>9fs  | FALS<br>E | TRUE      | FALS<br>E | TRUE      |
| pLOF          | 21 | 34997<br>067 | C                | T  | lof  | CRYZ<br>L1  | .             | FALS<br>E | FALS<br>E | FALS<br>E | FALS<br>E |
| pLOF          | 21 | 38516<br>934 | C                | CA | lof  | TTC3        | p.Q62<br>8fs  | FALS<br>E | TRUE      | FALS<br>E | FALS<br>E |
| pLOF          | 21 | 38524<br>331 | T                | C  | lof  | TTC3        | .             | FALS<br>E | TRUE      | FALS<br>E | FALS<br>E |
| pLOF          | 21 | 40800<br>320 | CTG<br>GG        | C  | lof  | LCA5<br>L   | p.Ser<br>32fs | FALS<br>E | FALS<br>E | FALS<br>E | FALS<br>E |
| dDNV<br>/pLOF | 21 | 42811<br>689 | C                | T  | lof  | MX1         | p.R16<br>9X   | FALS<br>E | FALS<br>E | FALS<br>E | FALS<br>E |
| dDNV          | 21 | 42845<br>382 | C                | T  | misD | TMP<br>RSS2 | p.V25<br>7M   | FALS<br>E | FALS<br>E | FALS<br>E | FALS<br>E |
| pLOF          | 21 | 43508<br>540 | TG               | T  | lof  | UMO<br>DL1  | p.L24<br>7fs  | FALS<br>E | FALS<br>E | FALS<br>E | FALS<br>E |
| pLOF          | 21 | 43524<br>017 | C                | T  | lof  | UMO<br>DL1  | p.R44<br>7X   | FALS<br>E | FALS<br>E | FALS<br>E | FALS<br>E |
| dDNV<br>/pLOF | 21 | 47337<br>539 | CG               | C  | lof  | PCBP<br>3   | p.P23<br>8fs  | FALS<br>E | FALS<br>E | FALS<br>E | TRUE      |
| pLOF          | 21 | 47419<br>607 | G                | A  | lof  | COL6<br>A1  | NA            | FALS<br>E | FALS<br>E | TRUE      | TRUE      |
| pLOF          | 22 | 18210<br>166 | A                | T  | lof  | BCL2<br>L13 | p.R44<br>2X   | FALS<br>E | TRUE      | FALS<br>E | FALS<br>E |
| dDNV          | 22 | 19076<br>893 | C                | T  | misD | DGC<br>R2   | p.A64<br>T    | FALS<br>E | TRUE      | FALS<br>E | FALS<br>E |
| pLOF          | 22 | 25119<br>170 | G                | GA | lof  | PIWIL<br>3  | p.L76<br>2fs  | FALS<br>E | FALS<br>E | FALS<br>E | FALS<br>E |
| pLOF          | 22 | 29095<br>881 | CG               | C  | lof  | CHEK<br>2   | p.R97<br>fs   | FALS<br>E | FALS<br>E | FALS<br>E | FALS<br>E |
| pLOF          | 22 | 31685<br>303 | C                | CT | lof  | PIK3I<br>P1 | p.K19<br>5fs  | FALS<br>E | FALS<br>E | FALS<br>E | FALS<br>E |
| dDNV<br>/pLOF | 22 | 36141<br>969 | C                | G  | lof  | RBFO<br>X2  | NA            | FALS<br>E | TRUE      | FALS<br>E | TRUE      |
| pLOF          | 22 | 36538<br>003 | AC               | A  | lof  | APOL<br>3   | p.W8<br>0fs   | FALS<br>E | FALS<br>E | FALS<br>E | FALS<br>E |
| pLOF          | 22 | 37398<br>251 | GAG<br>GTGT<br>C | G  | lof  | TEX3<br>3   | p.D37<br>fs   | FALS<br>E | FALS<br>E | FALS<br>E | FALS<br>E |
| dDNV          | 22 | 37533<br>655 | C                | T  | misD | IL2RB       | p.R17<br>0Q   | FALS<br>E | FALS<br>E | FALS<br>E | FALS<br>E |
| pLOF          | 22 | 38151<br>106 | A                | G  | lof  | TRIO<br>BP  | NA            | FALS<br>E | TRUE      | FALS<br>E | FALS<br>E |

|      |    |          |                                                                    |    |      |           |            |           |           |           |           |
|------|----|----------|--------------------------------------------------------------------|----|------|-----------|------------|-----------|-----------|-----------|-----------|
| pLOF | 22 | 38221060 | GGG<br>CCG<br>CGC<br>GGG<br>GCG<br>CGC<br>CATG<br>CTG<br>GCG<br>GT | G  | lof  | GALR3     | p.Gly234fs | FALS<br>E | FALS<br>E | FALS<br>E | FALS<br>E |
| pLOF | 22 | 39817965 | C                                                                  | T  | lof  | TAB1      | p.Q304X    | FALS<br>E | FALS<br>E | FALS<br>E | FALS<br>E |
| pLOF | 22 | 40757290 | T                                                                  | TA | lof  | ADSL      | p.I269fs   | FALS<br>E | TRUE      | TRUE      | FALS<br>E |
| pLOF | 22 | 41969738 | AC                                                                 | A  | lof  | CSDC2     | p.T86fs    | FALS<br>E | FALS<br>E | FALS<br>E | FALS<br>E |
| pLOF | 22 | 44892952 | A                                                                  | T  | lof  | LDOC1L    | p.L162X    | FALS<br>E | FALS<br>E | FALS<br>E | FALS<br>E |
| pLOF | 22 | 45740492 | TGA<br>GA                                                          | T  | lof  | SMC1B     | p.S1217fs  | FALS<br>E | FALS<br>E | FALS<br>E | FALS<br>E |
| dDNV | 22 | 46614260 | G                                                                  | A  | misD | PPARA     | p.R157Q    | FALS<br>E | FALS<br>E | FALS<br>E | FALS<br>E |
| dDNV | 22 | 50898382 | T                                                                  | C  | misD | SBF1      | p.S1164G   | FALS<br>E | TRUE      | TRUE      | TRUE      |
| pLOF | 22 | 50957619 | GC                                                                 | G  | lof  | NCAPH2    | p.Ser246fs | FALS<br>E | TRUE      | FALS<br>E | FALS<br>E |
| pLOF | X  | 41419006 | TG                                                                 | T  | lof  | CASK      | p.His588fs | FALS<br>E | FALS<br>E | TRUE      | TRUE      |
| pLOF | X  | 48923276 | A                                                                  | G  | lof  | CCDC120   | .          | FALS<br>E | FALS<br>E | FALS<br>E | FALS<br>E |
| pLOF | X  | 54783695 | CA                                                                 | C  | lof  | ITIH6     | p.P937fs   | FALS<br>E | FALS<br>E | FALS<br>E | FALS<br>E |
| pLOF | X  | 67938438 | C                                                                  | G  | lof  | STAR8D8   | p.S561X    | FALS<br>E | FALS<br>E | FALS<br>E | FALS<br>E |
| dDNV | X  | 78616853 | G                                                                  | A  | misD | ITM2A     | p.R226C    | FALS<br>E | TRUE      | FALS<br>E | FALS<br>E |
| pLOF | X  | 1E+08    | TG                                                                 | T  | lof  | TRMT2B    | p.His495fs | FALS<br>E | FALS<br>E | FALS<br>E | FALS<br>E |
| dDNV | X  | 1.03E+08 | C                                                                  | T  | misD | SLC25A53  | 0          | FALS<br>E | FALS<br>E | FALS<br>E | FALS<br>E |
| dDNV | X  | 1.07E+08 | G                                                                  | A  | misD | VSIG1     | p.V33M     | FALS<br>E | FALS<br>E | FALS<br>E | FALS<br>E |
| pLOF | X  | 1.14E+08 | G                                                                  | A  | lof  | RBMXL3    | p.W317X    | FALS<br>E | FALS<br>E | FALS<br>E | FALS<br>E |
| pLOF | X  | 1.31E+08 | G                                                                  | T  | lof  | RAP2C-AS1 | NA         | FALS<br>E | FALS<br>E | FALS<br>E | FALS<br>E |
| pLOF | X  | 1.35E+08 | TGAT<br>GA                                                         | T  | lof  | ADGRG4    | p.D2504fs  | FALS<br>E | FALS<br>E | FALS<br>E | FALS<br>E |

**eTable 3: Neurodevelopmental tests**

| Domain       | Measure                         | Mode           | Age Range | Completed By | Published Mean | Published Standard Deviation | Score Direction Indicating Impairment |
|--------------|---------------------------------|----------------|-----------|--------------|----------------|------------------------------|---------------------------------------|
| Visual-Motor | VMI-6                           | Direct Testing | ≥ 8 yrs   | Participant  | 100            | 15                           | Lower                                 |
| Intelligence | <b>WISC-V - Core Subtests:</b>  |                |           |              |                |                              |                                       |
|              | • Similarities                  | Direct Testing | < 16 yrs  | Participant  | 100            | 15                           | Lower                                 |
|              | • Vocabulary                    | Direct Testing |           | Participant  | 100            | 15                           | Lower                                 |
|              | • Block Design                  | Direct Testing |           | Participant  | 100            | 15                           | Lower                                 |
|              | • Matrix Reasoning              | Direct Testing |           | Participant  | 100            | 15                           | Lower                                 |
|              | • Figure Weights                | Direct Testing |           | Participant  | 100            | 15                           | Lower                                 |
|              | • Digit Span                    | Direct Testing |           | Participant  | 100            | 15                           | Lower                                 |
|              | • Coding                        | Direct Testing |           | Participant  | 100            | 15                           | Lower                                 |
|              | • Symbol Search                 | Direct Testing |           | Participant  | 100            | 15                           | Lower                                 |
| Intelligence | <b>WAIS-IV - Core Subtests:</b> |                |           |              |                |                              |                                       |
|              | • Block Design                  | Direct Testing | ≥ 16 yrs  | Participant  | 100            | 15                           | Lower                                 |
|              | • Similarities                  | Direct Testing |           | Participant  | 100            | 15                           | Lower                                 |
|              | • Digit Span                    | Direct Testing |           | Participant  | 100            | 15                           | Lower                                 |
|              | • Matrix Reasoning              | Direct Testing |           | Participant  | 100            | 15                           | Lower                                 |
|              | • Vocabulary                    | Direct Testing |           | Participant  | 100            | 15                           | Lower                                 |
|              | • Arithmetic                    | Direct Testing |           | Participant  | 100            | 15                           | Lower                                 |
|              | • Symbol Search                 | Direct Testing |           | Participant  | 100            | 15                           | Lower                                 |
|              | • Visual Puzzles                | Direct Testing |           | Participant  | 100            | 15                           | Lower                                 |
|              | • Information                   | Direct Testing |           | Participant  | 100            | 15                           | Lower                                 |
|              | • Coding                        | Direct Testing |           | Participant  | 100            | 15                           | Lower                                 |

|                    |                                                                                                       |                |          |                   |             |     |        |
|--------------------|-------------------------------------------------------------------------------------------------------|----------------|----------|-------------------|-------------|-----|--------|
| Memory             | <b>WRAML-2 Story Memory &amp; Picture Memory Immediate Recall Tasks</b>                               | Direct Testing | ≥8 yrs   | Participant       | 100         | 15  | Lower  |
| Academics          | <b>WRAT-4 Word Reading</b>                                                                            | Direct Testing | ≥8 yrs   | Participant       | 100         | 15  | Lower  |
| Memory             | <b>WRAML-2 Story Memory &amp; Delayed Recognition Recall Tasks</b>                                    | Direct Testing | ≥8 yrs   | Participant       | 100         | 15  | Lower  |
| Academics          | <b>WRAT-4 Remaining Subtests</b>                                                                      |                |          |                   |             |     |        |
|                    | • <b>Sentence Comprehension</b>                                                                       | Direct Testing | ≥8 yrs   | Participant       | 100         | 15  | Lower  |
|                    | • <b>Spelling</b>                                                                                     | Direct Testing |          | Participant       | 100         | 15  | Lower  |
|                    | • <b>Math Computation</b>                                                                             | Direct Testing |          | Participant       | 100         | 15  | Lower  |
| Executive Function | <b>D-KEFS (Selected Subtests)</b>                                                                     |                |          |                   |             |     |        |
|                    | • <b>Verbal Fluency</b>                                                                               | Direct Testing | ≥ 8 yrs  | Participant       | 10          | 3   | Lower  |
|                    | • <b>Trail Making</b>                                                                                 | Direct Testing |          | Participant       | 10          | 3   | Lower  |
|                    | • <b>Tower Subtests</b>                                                                               | Direct Testing |          | Participant       | 10          | 3   | Lower  |
| Language           | <b>WIAT-III</b>                                                                                       |                |          |                   |             |     |        |
|                    | • <b>Listening Comprehension</b>                                                                      | Direct Testing | ≥ 8 yrs  | Participant       | 100         | 15  | Lower  |
|                    | • <b>Oral Expression Subtests Only</b>                                                                | Direct Testing |          | Participant       | 100         | 15  | Lower  |
| Social Cognition   | <b>ADOS-2, administered if SRS-2 total score ≥60 or strong likelihood of autism spectrum disorder</b> | Direct Testing | ≥ 8 yrs  | Participant       | Categorical | N/A | Higher |
| Social Cognition   | <b>Social Responsiveness Scale, 2<sup>nd</sup> Edition (SRS-2)</b>                                    | Questionnaire  | ≥ 8 yrs  | Parent/care giver | Categorical | N/A | Higher |
| Executive Function | <b>BRIEF-2 Parent Report</b>                                                                          | Questionnaire  | < 18 yrs | Parent/care giver | 50          | 10  | Higher |

|                      |                                                                        |               |          |                   |             |     |        |
|----------------------|------------------------------------------------------------------------|---------------|----------|-------------------|-------------|-----|--------|
| Depression           | <b>Children's Depression Inventory, 2<sup>nd</sup> Edition (CDI-2)</b> | Questionnaire | < 18 yrs | Parent/care giver | 50          | 10  | Higher |
| Executive Function   | <b>Conners-3 Parent Report</b>                                         | Questionnaire | < 18 yrs | Parent/care giver | 50          | 10  | Higher |
| Anxiety              | <b>MASC-2 Parent Report</b>                                            | Questionnaire | < 18 yrs | Parent/care giver | 50          | 10  | Higher |
| Adaptive functioning | <b>Vineland-3 Caregiver Rating Form**</b>                              | Questionnaire | ≥ 8 yrs  | Parent/care giver | 100         | 15  | Lower  |
| Anxiety              | <b>Beck Anxiety Inventory</b>                                          | Questionnaire | ≥ 18 yrs | Participant       | Categorical | N/A | Higher |
| Depression           | <b>Beck Depression Inventory, 2<sup>nd</sup> Edition (BDI-2)</b>       | Questionnaire | ≥ 18 yrs | Participant       | Categorical | N/A | Higher |
| Executive Function   | <b>Conners-3</b>                                                       | Questionnaire | < 18 yrs | Teacher           | 50          | 10  | Higher |
| Executive Function   | <b>BRIEF-2</b>                                                         | Questionnaire | < 18 yrs | Teacher           | 50          | 10  | Higher |

| <b>eTable 4: Full results for neurodevelopmental outcomes by case/control status</b> |                                                       |                    |                    |                                 |
|--------------------------------------------------------------------------------------|-------------------------------------------------------|--------------------|--------------------|---------------------------------|
| <b>ND test</b>                                                                       | <b>Scores</b>                                         | <b>Case</b>        | <b>Control</b>     | <b>P-value from Mixed model</b> |
|                                                                                      |                                                       | <b>(N=109)</b>     | <b>(N=110)</b>     |                                 |
| <b>Intelligence</b>                                                                  |                                                       |                    |                    |                                 |
| WISC-V (< 16 yrs) & WAIS-IV (>= 16 yrs)                                              | <b>Processing Speed Index All Ages Standard Score</b> |                    |                    | 0.71                            |
|                                                                                      | N                                                     | 105                | 107                |                                 |
|                                                                                      | Min-Max                                               | 44.0-135.0         | 45.0-132.0         |                                 |
|                                                                                      | Mean (SD)                                             | 93.9 (17.93)       | 92.6 (16.36)       |                                 |
|                                                                                      | Median (Q1, Q3)                                       | 95.0 (86.0, 105.0) | 94.0 (84.0, 103.0) |                                 |
|                                                                                      | Missing                                               | 4                  | 3                  |                                 |
| WAIS-IV (>= 16 yrs)                                                                  | <b>Working Memory</b>                                 |                    |                    | 0.3                             |
|                                                                                      | N                                                     | 44                 | 46                 |                                 |
|                                                                                      | Min-Max                                               | 49.0-136.0         | 60.0-136.0         |                                 |
|                                                                                      | Mean (SD)                                             | 97.6 (16.65)       | 95.4 (15.70)       |                                 |
|                                                                                      | Median (Q1, Q3)                                       | 97.0 (92.0, 105.0) | 97.0 (83.0, 105.0) |                                 |
|                                                                                      | Missing                                               | 65                 | 64                 |                                 |
| <b>Executive Function</b>                                                            |                                                       |                    |                    |                                 |
| Conners-3 Parent (< 18 yrs)                                                          | <b>Executive Functioning</b>                          |                    |                    | 0.27                            |
|                                                                                      | N                                                     | 56                 | 59                 |                                 |
|                                                                                      | Min-Max                                               | 0.0-88.0           | 35.0-89.0          |                                 |
|                                                                                      | Mean (SD)                                             | 54.3 (16.00)       | 56.9 (14.12)       |                                 |
|                                                                                      | Median (Q1, Q3)                                       | 54.0 (45.0, 62.0)  | 55.0 (45.0, 65.0)  |                                 |
|                                                                                      | Missing                                               | 53                 | 51                 |                                 |
| Conners-3 Teacher (< 18 yrs)                                                         | <b>Executive Functioning</b>                          |                    |                    | 0.1                             |
|                                                                                      | N                                                     | 31                 | 42                 |                                 |
|                                                                                      | Min-Max                                               | 39.0-73.0          | 39.0-81.0          |                                 |
|                                                                                      | Mean (SD)                                             | 51.4 (9.79)        | 55.8 (11.51)       |                                 |
|                                                                                      | Median (Q1, Q3)                                       | 51.0 (43.0, 59.0)  | 53.5 (46.0, 66.0)  |                                 |
|                                                                                      | Missing                                               | 78                 | 68                 |                                 |
| D-KEFS (>= 8 yrs)                                                                    | <b>Category Switching Total Accuracy</b>              |                    |                    | 0.24                            |
|                                                                                      | N                                                     | 107                | 108                |                                 |
|                                                                                      | Min-Max                                               | 0.0-19.0           | 1.0-19.0           |                                 |
|                                                                                      | Mean (SD)                                             | 10.6 (3.97)        | 9.8 (3.59)         |                                 |



|                              |                                                                              |                   |                   |      |
|------------------------------|------------------------------------------------------------------------------|-------------------|-------------------|------|
|                              | Median (Q1, Q3)                                                              | 11.0 (9.0, 13.0)  | 10.0 (7.0, 12.5)  |      |
|                              | Missing                                                                      | 2                 | 2                 |      |
| <b>Memory</b>                |                                                                              |                   |                   |      |
| WRAML-2 (>= 8 yrs)           | <b>IMMEDIATE Recall: Story Memory</b>                                        |                   |                   | 0.33 |
|                              | N                                                                            | 108               | 110               |      |
|                              | Min-Max                                                                      | 0.0-18.0          | 1.0-19.0          |      |
|                              | Mean (SD)                                                                    | 10.5 (3.49)       | 10.1 (3.12)       |      |
|                              | Median (Q1, Q3)                                                              | 11.0 (8.5, 13.0)  | 11.0(8,12)        |      |
|                              | Missing                                                                      | 1                 | 0                 |      |
|                              | <b>IMMEDIATE Recall: Picture Memory</b>                                      |                   |                   | 0.71 |
|                              | N                                                                            | 104               | 107               |      |
|                              | Min-Max                                                                      | 0.0-16.0          | 3.0-16.0          |      |
|                              | Mean (SD)                                                                    | 8.4 (3.14)        | 8.6 (3.04)        |      |
|                              | Median (Q1, Q3)                                                              | 9.0 (6.0, 11.0)   | 8.0 (7.0, 11.0)   |      |
|                              | Missing                                                                      | 5                 | 3                 |      |
| <b>ADOS and SRS</b>          |                                                                              |                   |                   |      |
| Conners-3 Parent (< 18 yrs)  | <b>Peer Relations</b>                                                        |                   |                   | 0.77 |
|                              | N                                                                            | 56                | 59                |      |
|                              | Min-Max                                                                      | 1.0-99.0          | 41.0-99.0         |      |
|                              | Mean (SD)                                                                    | 54.7 (16.60)      | 55.9 (16.47)      |      |
|                              | Median (Q1, Q3)                                                              | 49.0 (44.0, 62.0) | 49.0 (43.0, 62.0) |      |
|                              | Missing                                                                      | 53                | 51                |      |
| Conners-3 Teacher (< 18 yrs) | <b>Peer Relations</b>                                                        |                   |                   | 0.44 |
|                              | N                                                                            | 32                | 43                |      |
|                              | Min-Max                                                                      | 2.0-99.0          | 41.0-99.0         |      |
|                              | Mean (SD)                                                                    | 56.4 (18.68)      | 53.5 (14.34)      |      |
|                              | Median (Q1, Q3)                                                              | 51.0 (45.5, 67.5) | 48.0 (43.0, 57.0) |      |
|                              | Missing                                                                      | 77                | 67                |      |
| Screening classification     | <b>Composite outcome defined by ADOS-2 and SRS-2 Total Score<sup>1</sup></b> |                   |                   | 0.73 |
|                              | Non Spectrum                                                                 | 76 (91.6%)        | 80 (94.1%)        |      |
|                              | Autism/Autism Spectrum                                                       | 7 (8.4%)          | 5 (5.9%)          |      |
|                              | Missing                                                                      | 26                | 25                |      |
| <b>Language Deficits</b>     |                                                                              |                   |                   |      |
| WIAT-III (>= 8 yrs)          | <b>Oral Language Index</b>                                                   |                   |                   | 0.83 |
|                              | N                                                                            | 91                | 92                |      |
|                              | Min-Max                                                                      | 39.0-141.0        | 62.0-140.0        |      |

|                                    |                                               |                        |                        |      |
|------------------------------------|-----------------------------------------------|------------------------|------------------------|------|
|                                    | Mean (SD)                                     | 104.1<br>(19.71)       | 104.5<br>(16.18)       |      |
|                                    | Median (Q1, Q3)                               | 107.0 (94.0,<br>116.0) | 105.0 (93.0,<br>117.0) |      |
|                                    | Missing                                       | 18                     | 18                     |      |
| <b>Adaptive Functioning</b>        |                                               |                        |                        |      |
| Vineland-3 (>= 8 yrs)              | <b>Communication</b>                          |                        |                        | 0.49 |
|                                    | N                                             | 79                     | 82                     |      |
|                                    | Min-Max                                       | 49.0-137.0             | 53.0-120.0             |      |
|                                    | Mean (SD)                                     | 100.4<br>(13.99)       | 102.0<br>(11.86)       |      |
|                                    | Median (Q1, Q3)                               | 103.0 (96.0,<br>109.0) | 107.0 (98.0,<br>109.0) |      |
|                                    | Missing                                       | 30                     | 28                     |      |
|                                    | <b>Daily Living Skills</b>                    |                        |                        | 0.24 |
|                                    | N                                             | 78                     | 82                     |      |
|                                    | Min-Max                                       | 58.0-135.0             | 50.0-131.0             |      |
|                                    | Mean (SD)                                     | 102.2<br>(15.06)       | 100.2<br>(14.59)       |      |
|                                    | Median (Q1, Q3)                               | 104.0 (93.0,<br>116.0) | 102.0 (93.0,<br>108.0) |      |
|                                    | Missing                                       | 31                     | 28                     |      |
|                                    | <b>Socialization</b>                          |                        |                        | 0.27 |
|                                    | N                                             | 79                     | 82                     |      |
|                                    | Min-Max                                       | 40.0-122.0             | 68.0-122.0             |      |
|                                    | Mean (SD)                                     | 99.5 (14.35)           | 101.8<br>(11.36)       |      |
|                                    | Median (Q1, Q3)                               | 102.0 (94.0,<br>110.0) | 104.5 (98.0,<br>110.0) |      |
|                                    | Missing                                       | 30                     | 28                     |      |
|                                    | <b>Motor Skills</b>                           |                        |                        | 0.06 |
|                                    | N                                             | 17                     | 19                     |      |
|                                    | Min-Max                                       | 81.0-118.0             | 62.0-111.0             |      |
|                                    | Mean (SD)                                     | 100.8<br>(11.16)       | 93.7 (12.64)           |      |
|                                    | Median (Q1, Q3)                               | 102.0 (92.0,<br>111.0) | 96.0 (83.0,<br>105.0)  |      |
|                                    | Missing                                       | 92                     | 91                     |      |
| <b>Anxiety and Depression</b>      |                                               |                        |                        |      |
| Beck Anxiety Inventory (>= 18 yrs) | <b>BAI Total Raw Score Binary<sup>2</sup></b> |                        |                        | -    |
|                                    | Low                                           | 30 (81.1%)             | 31 (88.6%)             |      |
|                                    | Moderate/Potentially concerning               | 7 (18.9%)              | 4 (11.4%)              |      |
|                                    | Missing                                       | 72                     | 75                     |      |

|                                               |                                                 |                   |                   |      |
|-----------------------------------------------|-------------------------------------------------|-------------------|-------------------|------|
| Beck Depression Inventory (>= 18 yrs)         | <b>BDI-2 Total Raw Score Binary<sup>3</sup></b> |                   |                   | -    |
|                                               | None/Mild                                       | 33 (89.2%)        | 31 (88.6%)        |      |
|                                               | Moderate/Severe                                 | 4 (10.8%)         | 4 (11.4%)         |      |
|                                               | Missing                                         | 72                | 75                |      |
| <b>ADHD/Attention</b>                         |                                                 |                   |                   |      |
| Conners-3 Parent (< 18 yrs)                   | <b>DSM-5 ADHD Inattentive</b>                   |                   |                   | 0.71 |
|                                               | N                                               | 56                | 59                |      |
|                                               | Min-Max                                         | 6.0-90.0          | 35.0-90.0         |      |
|                                               | Mean (SD)                                       | 55.6 (14.98)      | 56.6 (14.94)      |      |
|                                               | Median (Q1, Q3)                                 | 52.0 (45.0, 64.5) | 54.0 (45.0, 68.0) |      |
|                                               | Missing                                         | 53                | 51                |      |
|                                               | <b>DSM-5 ADHD Hyperactive-Impulsive</b>         |                   |                   | 0.4  |
|                                               | N                                               | 56                | 59                |      |
|                                               | Min-Max                                         | 0.0-99.0          | 39.0-89.0         |      |
|                                               | Mean (SD)                                       | 55.9 (17.46)      | 54.3 (13.81)      |      |
|                                               | Median (Q1, Q3)                                 | 53.0 (43.5, 68.5) | 50.0 (43.0, 60.0) |      |
|                                               | Missing                                         | 53                | 51                |      |
| Conners-3 Teacher (< 18 yrs)                  | <b>DSM-5 ADHD Inattentive</b>                   |                   |                   | 0.13 |
|                                               | N                                               | 31                | 43                |      |
|                                               | Min-Max                                         | 39.0-80.0         | 41.0-89.0         |      |
|                                               | Mean (SD)                                       | 52.1 (10.78)      | 56.3 (13.39)      |      |
|                                               | Median (Q1, Q3)                                 | 46.0 (44.0, 61.0) | 53.0 (44.0, 62.0) |      |
|                                               | Missing                                         | 78                | 67                |      |
|                                               | <b>DSM-5 ADHD Hyperactive-Impulsive</b>         |                   |                   | 0.92 |
|                                               | N                                               | 31                | 43                |      |
|                                               | Min-Max                                         | 42.0-91.0         | 42.0-90.0         |      |
|                                               | Mean (SD)                                       | 55.7 (14.47)      | 55.7 (14.85)      |      |
|                                               | Median (Q1, Q3)                                 | 51.0 (44.0, 61.0) | 49.0 (44.0, 63.0) |      |
|                                               | Missing                                         | 78                | 67                |      |
| Conners' Adult ADHD Rating Scales (>= 18 yrs) | <b>DSM-IV ADHD Symptoms Total</b>               |                   |                   | 0.24 |
|                                               | N                                               | 37                | 36                |      |
|                                               | Min-Max                                         | 31.0-91.0         | 31.0-85.0         |      |
|                                               | Mean (SD)                                       | 53.5 (16.56)      | 50.1 (12.65)      |      |
|                                               | Median (Q1, Q3)                                 | 49.0 (41.0, 57.0) | 48.5 (42.5, 57.5) |      |
|                                               | Missing                                         | 72                | 74                |      |

|                                                                                                                                                                                                                                                                                                                                                                                                                                                                                                                                                                                                                                                                                                                                                                         |  |  |
|-------------------------------------------------------------------------------------------------------------------------------------------------------------------------------------------------------------------------------------------------------------------------------------------------------------------------------------------------------------------------------------------------------------------------------------------------------------------------------------------------------------------------------------------------------------------------------------------------------------------------------------------------------------------------------------------------------------------------------------------------------------------------|--|--|
| <sup>1</sup> Screening classification outcome is defined as the following: = Autism/Autism Spectrum, if "Autism" or "Autism Spectrum" were marked on ADOS form; = Non-Spectrum, if 1) "Non-Spectrum" was marked on ADOS form; or 2) no ADOS data and SRS total score < 60; = missing, if 1) neither ADOS nor SRS was done; or 2) no ADOS data and SRS total score >= 60.                                                                                                                                                                                                                                                                                                                                                                                                |  |  |
| <sup>2</sup> BAI Total Raw Score Binary is defined as the following: 0-21: low, >=22: Moderate/Potentially concerning.                                                                                                                                                                                                                                                                                                                                                                                                                                                                                                                                                                                                                                                  |  |  |
| <sup>3</sup> BDI-2 Total Raw Score Binary Binary is defined as the following: 0-19: None/Mild, >=20: Moderate/Severe.                                                                                                                                                                                                                                                                                                                                                                                                                                                                                                                                                                                                                                                   |  |  |
| Absent p-value is because the model did not converge due to limited sample size and small event rate.                                                                                                                                                                                                                                                                                                                                                                                                                                                                                                                                                                                                                                                                   |  |  |
| Normative values: The normative mean score is 100 and standard deviation (SD) is 15 for all tests with these exceptions: Behavior Rating Inventory of Executive Function, Second Edition (BRIEF-2), Children's Depression Index, Second Edition (CDI-2), Conners' Scales, Multidimensional Anxiety Scale for Children, Second Edition (MASC-2) has mean 50, SD 10; Delis-Kaplan Executive Function System (D-KEFS) has mean 10, SD 3; Social Responsiveness Scale, Second Edition (SRS-2) reports T-score ≥ 76 for severe symptoms, 66-75 for moderate, 60-65 for mild, and < 60 typical; Beck Anxiety Inventory (BAI) and Beck Depression Inventory, Second Edition (BDI-II) score 30-63 for severe symptoms, 17-29 for moderate, 10-16 for mild, and 0-9 for minimal. |  |  |

| <b>eTable 5: Brain MRI findings by case/control status</b>         |                             |                          |                 |
|--------------------------------------------------------------------|-----------------------------|--------------------------|-----------------|
|                                                                    | <b>Case</b>                 | <b>Control</b>           | <b>P-value*</b> |
| <b>MRI Findings</b>                                                | <b>(N=53)<br/>Number(%)</b> | <b>(N=55) Number (%)</b> |                 |
| <b>Focal infarct: number</b>                                       |                             |                          | 0.56            |
| 0                                                                  | 48 (90.6%)                  | 47 (85.5%)               |                 |
| 1-5                                                                | 5 (9.4%)                    | 8 (14.5%)                |                 |
| <b>Focal infarct: size (out of Focal infarct number unequal 0)</b> |                             |                          |                 |
| None                                                               | 48 (90.6%)                  | 47 (85.5%)               |                 |
| <1 cm                                                              | 4 (7.5%)                    | 5 (9.1%)                 |                 |
| 1-3 cm                                                             | 1 (1.9%)                    | 2 (3.6%)                 |                 |
| > 3 cm                                                             |                             | 1 (1.8%)                 |                 |
| <b>Foci of low T2: number</b>                                      |                             |                          | 0.49            |
| 0                                                                  | 52 (98.1%)                  | 55 (100%)                |                 |
| 1-5                                                                | 1 (1.9%)                    |                          |                 |
| <b>Foci of high T2: number</b>                                     |                             |                          | 0.97            |
| 0                                                                  | 37 (69.8%)                  | 39 (70.9%)               |                 |
| 1-5                                                                | 14 (26.4%)                  | 13 (23.6%)               |                 |
| 6-10                                                               | 2 (3.8%)                    | 2 (3.6%)                 |                 |
| >20                                                                |                             | 1 (1.8%)                 |                 |
| <b>Other abnormalities missing or not</b>                          |                             |                          | >0.99           |
| No                                                                 | 29 (54.7%)                  | 31 (56.4%)               |                 |
| Yes                                                                | 24 (45.3%)                  | 24 (43.6%)               |                 |
| * Fisher's exact test p-value.                                     |                             |                          |                 |

| <b>eTable 6: MRI differences by case/control status and post hoc analysis</b> |                     |                     |                     |                     |                     |                     |                    |                     |                     |                     |                     |                     |                       |                     |                     |
|-------------------------------------------------------------------------------|---------------------|---------------------|---------------------|---------------------|---------------------|---------------------|--------------------|---------------------|---------------------|---------------------|---------------------|---------------------|-----------------------|---------------------|---------------------|
|                                                                               | Case/ Control       |                     | Mixed model p-value | HBE LOF Variant     |                     | Mixed model p-value | NDD LOF Variant    |                     | Mixed model p-value | pLI LOF Variant     |                     | Mixed model p-value | Chromatin LOF Variant |                     | Mixed model p-value |
| MRI Scores                                                                    | Case                | Control             |                     | Yes                 | No                  |                     | Yes                | No                  |                     | Yes                 | No                  |                     | Yes                   | No                  |                     |
|                                                                               | (N=50)              | (N=49)              |                     | (N=62)              | (N=38)              |                     | (N=8)              | (N=92)              |                     | (N=40)              | (N=60)              |                     | (N=9)                 | (N=91)              |                     |
| <b>Cortical Thickness</b>                                                     |                     |                     | 0.33                |                     |                     | 0.61                |                    |                     | 0.71                |                     |                     | 0.85                |                       |                     | 0.87                |
| N                                                                             | 47                  | 47                  |                     | 59                  | 36                  |                     | 8                  | 87                  |                     | 38                  | 57                  |                     | 8                     | 87                  |                     |
| Min-Max                                                                       | 2.4-2.9             | 2.3-3.1             |                     | 2.4-3.0             | 2.3-3.1             |                     | 2.5-2.8            | 2.3-3.1             |                     | 2.4-3.0             | 2.3-3.1             |                     | 2.6-2.8               | 2.3-3.1             |                     |
| Mean (SD)                                                                     | 2.7 (0.14)          | 2.7 (0.16)          |                     | 2.7 (0.14)          | 2.6 (0.15)          |                     | 2.6 (0.10)         | 2.7 (0.15)          |                     | 2.7 (0.14)          | 2.7 (0.15)          |                     | 2.7 (0.10)            | 2.6 (0.15)          |                     |
| <b>Cortical Surface Area</b>                                                  |                     |                     | 0.72                |                     |                     | 0.87                |                    |                     | 0.79                |                     |                     | 0.45                |                       |                     | 0.69                |
| N                                                                             | 47                  | 47                  |                     | 59                  | 36                  |                     | 8                  | 87                  |                     | 38                  | 57                  |                     | 8                     | 87                  |                     |
| Min-Max                                                                       | 152691-223062       | 142443-219342       |                     | 142443-223062       | 148797-220943       |                     | 168102-197667      | 142443-223062       |                     | 142443-223062       | 152691-220943       |                     | 142443-208264         | 147078-223062       |                     |
| Mean (SD)                                                                     | 177002 (17183.49)   | 179026 (17504.49)   |                     | 177256 (16488.30)   | 178445 (19137.49)   |                     | 181490 (11727.87)  | 177358 (17891.93)   |                     | 177740 (18496.76)   | 177684 (16881.60)   |                     | 174739 (22436.08)     | 177979 (17055.88)   |                     |
| <b>Whole Brain Volume</b>                                                     |                     |                     | 0.64                |                     |                     | 0.81                |                    |                     | 0.69                |                     |                     | 0.27                |                       |                     | 0.60                |
| N                                                                             | 47                  | 47                  |                     | 59                  | 36                  |                     | 8                  | 87                  |                     | 38                  | 57                  |                     | 8                     | 87                  |                     |
| Min-Max                                                                       | 971595-1403608      | 926895-1393940      |                     | 926895-1403608      | 965679-1393940      |                     | 104517-1290853     | 926895-1403608      |                     | 926895-1403608      | 965679-1393940      |                     | 926895-1382723        | 965679-1403608      |                     |
| Mean (SD)                                                                     | 1142510 (114597.50) | 1153743 (113885.57) |                     | 1141161 (106609.15) | 1154673 (127705.76) |                     | 1158059 (88489.53) | 1145199 (117040.24) |                     | 1152890 (119706.42) | 1141876 (111893.33) |                     | 1123947 (155149.70)   | 1148335 (111085.07) |                     |
| <b>Ventricular Volume</b>                                                     |                     |                     | 0.33                |                     |                     | 0.40                |                    |                     | <b>0.02</b>         |                     |                     | 0.86                |                       |                     | 0.81                |

|                               |                  |                 |      |                  |                 |      |                         |                        |             |                    |                    |             |                 |                  |      |
|-------------------------------|------------------|-----------------|------|------------------|-----------------|------|-------------------------|------------------------|-------------|--------------------|--------------------|-------------|-----------------|------------------|------|
| N                             | 47               | 47              |      | 59               | 36              |      | <b>8</b>                | <b>87</b>              |             | 38                 | 57                 |             | 8               | 87               |      |
| Min-Max                       | 6361-82836       | 6626-40141      |      | 6361-82836       | 6601-30983      |      | <b>9261-58017</b>       | <b>6361-82836</b>      |             | 6361-58017         | 6601-82836         |             | 7565-20074      | 6361-82836       |      |
| Mean (SD)                     | 16318 (13519.40) | 14276 (7398.05) |      | 15797 (12748.09) | 14237 (6796.41) |      | <b>24792 (16597.92)</b> | <b>14325 (9862.87)</b> |             | 14870 (9691.28)    | 15430 (11660.87)   |             | 14107 (5040.27) | 15307 (11262.46) |      |
| <b>Diffusion DTI</b>          |                  |                 | 0.51 |                  |                 | 0.84 |                         |                        | <b>0.05</b> |                    |                    | 0.65        |                 |                  | 0.10 |
| N                             | 45               | 44              |      | 55               | 35              |      | <b>7</b>                | <b>83</b>              |             | 37                 | 53                 |             | 8               | 82               |      |
| Min-Max                       | 0.73-0.86        | 0.73-0.85       |      | 0.74-0.86        | 0.73-0.84       |      | <b>0.76-0.86</b>        | <b>0.73-0.84</b>       |             | 0.73-0.84          | 0.73-0.86          |             | 0.78-0.84       | 0.73-0.86        |      |
| Mean (SD)                     | 0.78 (0.02)      | 0.78 (0.03)     |      | 0.79 (0.03)      | 0.78 (0.02)     |      | <b>0.80 (0.04)</b>      | <b>0.78 (0.02)</b>     |             | 0.78 (0.03)        | 0.78 (0.03)        |             | 0.80 (0.02)     | 0.78 (0.03)      |      |
| <b>Diffusion RSI</b>          |                  |                 | 0.28 |                  |                 | 0.07 |                         |                        | 0.06        |                    |                    | 0.25        |                 |                  | 0.71 |
| N                             | 45               | 45              |      | 55               | 35              |      | 7                       | 83                     |             | 37                 | 53                 |             | 8               | 82               |      |
| Min-Max                       | 0.60-0.72        | 0.64-0.73       |      | 0.60-0.73        | 0.64-0.73       |      | 0.60-0.69               | 0.64-0.73              |             | 0.64-0.72          | 0.60-0.73          |             | 0.64-0.69       | 0.60-0.73        |      |
| Mean (SD)                     | 0.68 (0.02)      | 0.69 (0.02)     |      | 0.68 (0.02)      | 0.69 (0.02)     |      | 0.67 (0.03)             | 0.69 (0.02)            |             | 0.68 (0.02)        | 0.69 (0.02)        |             | 0.67 (0.02)     | 0.69 (0.02)      |      |
| <b>RS-fMRI Gordon Network</b> |                  |                 | 0.43 |                  |                 | 0.16 |                         |                        | 0.46        |                    |                    | <b>0.02</b> |                 |                  | 0.50 |
| N                             | 42               | 42              |      | 52               | 33              |      | 4                       | 81                     |             | <b>34</b>          | <b>51</b>          |             | 8               | 77               |      |
| Min-Max                       | 0.12-0.48        | 0.11-0.42       |      | 0.12-0.48        | 0.11-0.42       |      | 0.15-0.28               | 0.11-0.48              |             | <b>0.17-0.37</b>   | <b>0.11-0.48</b>   |             | 0.22-0.34       | 0.11-0.48        |      |
| Mean (SD)                     | 0.26 (0.07)      | 0.26 (0.06)     |      | 0.25 (0.06)      | 0.27 (0.07)     |      | 0.22 (0.05)             | 0.26 (0.06)            |             | <b>0.25 (0.04)</b> | <b>0.26 (0.08)</b> |             | 0.27 (0.04)     | 0.26 (0.07)      |      |

| eTable 7: Neurodevelopmental outcomes in post hoc analysis |                   |                 |               |                          |                 |               |                          |                 |               |                          |                       |               |                          |
|------------------------------------------------------------|-------------------|-----------------|---------------|--------------------------|-----------------|---------------|--------------------------|-----------------|---------------|--------------------------|-----------------------|---------------|--------------------------|
| ND test                                                    | Scores            | Presence of HBE |               |                          | Presence of NDD |               |                          | Presence of PLI |               |                          | Presence of Chromatin |               |                          |
|                                                            |                   | Yes             | No            | P-value from Mixed model | Yes             | No            | P-value from Mixed model | Yes             | No            | P-value from Mixed model | Yes                   | No            | P-value from Mixed model |
|                                                            |                   | (N=132)         | (N=86)        |                          | (N=25)          | (N=193)       |                          | (N=95)          | (N=123)       |                          | (N=16)                | (N=202)       |                          |
| Primary outcome measure: Academics                         |                   |                 |               |                          |                 |               |                          |                 |               |                          |                       |               |                          |
| WRAT-IV (>= 8 yrs)                                         | Reading Composite |                 |               | 0.60                     |                 |               | 0.11                     |                 |               | 0.28                     |                       |               | 0.08                     |
|                                                            | N                 | 118             | 74            |                          | 23              | 169           |                          | 89              | 103           |                          | 15                    | 177           |                          |
|                                                            | Min-Max           | 54.0-137.0      | 67.0-133.0    |                          | 54.0-122.0      | 54.0-137.0    |                          | 54.0-132.0      | 66.0-137.0    |                          | 54.0-131.0            | 54.0-137.0    |                          |
|                                                            | Mean (SD)         | 102.5 (16.52)   | 105.1 (13.84) |                          | 97.9 (15.82)    | 104.3 (15.41) |                          | 102.1 (16.26)   | 104.7 (14.91) |                          | 95.5 (20.30)          | 104.2 (14.97) |                          |
|                                                            | Spelling          |                 |               | 0.50                     |                 |               | 0.16                     |                 |               | 0.58                     |                       |               | 0.15                     |
|                                                            | N                 | 119             | 73            |                          | 24              | 168           |                          | 89              | 103           |                          | 15                    | 177           |                          |
|                                                            | Min-Max           | 54.0-145.0      | 55.0-142.0    |                          | 54.0-122.0      | 54.0-145.0    |                          | 54.0-145.0      | 55.0-142.0    |                          | 54.0-117.0            | 54.0-145.0    |                          |
|                                                            | Mean (SD)         | 102.8 (17.61)   | 102.7 (14.76) |                          | 98.3 (16.81)    | 103.4 (16.46) |                          | 103.1 (17.61)   | 102.4 (15.65) |                          | 95.4 (15.86)          | 103.4 (16.49) |                          |
|                                                            | Math Computation  |                 |               | 0.24                     |                 |               | 0.71                     |                 |               | 0.73                     |                       |               | 0.51                     |
|                                                            | N                 | 129             | 80            |                          | 23              | 186           |                          | 93              | 116           |                          | 16                    | 193           |                          |
|                                                            | Min-Max           | 41.0-139.0      | 59.0-130.0    |                          | 54.0-136.0      | 41.0-139.0    |                          | 54.0-136.0      | 41.0-139.0    |                          | 54.0-124.0            | 41.0-139.0    |                          |
|                                                            | Mean (SD)         | 96.3 (19.26)    | 99.4 (16.05)  |                          | 96.9 (20.62)    | 97.6 (17.85)  |                          | 97.3 (19.36)    | 97.6 (17.15)  |                          | 94.0 (19.89)          | 97.8 (18.00)  |                          |
| Intelligence                                               |                   |                 |               |                          |                 |               |                          |                 |               |                          |                       |               |                          |



|                                         |                                                    |               |               |      |              |               |      |               |               |      |              |               |      |
|-----------------------------------------|----------------------------------------------------|---------------|---------------|------|--------------|---------------|------|---------------|---------------|------|--------------|---------------|------|
| WISC-V (< 16 yrs) & WAIS-IV (>= 16 yrs) | Full-Scale IQ All Ages Standard Score              |               |               | 0.18 |              |               | 0.49 |               |               | 0.52 |              |               | 0.13 |
|                                         | N                                                  | 129           | 80            |      | 23           | 186           |      | 93            | 116           |      | 16           | 193           |      |
|                                         | Min-Max                                            | 39.0-136.0    | 45.0-130.0    |      | 39.0-130.0   | 39.0-136.0    |      | 39.0-136.0    | 45.0-130.0    |      | 39.0-129.0   | 39.0-136.0    |      |
|                                         | Mean (SD)                                          | 95.4 (18.40)  | 100.2 (16.49) |      | 94.9 (20.97) | 97.5 (17.42)  |      | 97.0 (19.00)  | 97.5 (16.88)  |      | 89.9 (20.47) | 97.8 (17.49)  |      |
|                                         | Verbal Comprehension Index All Ages Standard Score |               |               | 0.24 |              |               | 0.26 |               |               | 0.26 |              |               | 0.01 |
|                                         | N                                                  | 131           | 85            |      | 24           | 192           |      | 95            | 121           |      | 16           | 200           |      |
|                                         | Min-Max                                            | 44.0-143.0    | 55.0-145.0    |      | 49.0-136.0   | 44.0-145.0    |      | 44.0-143.0    | 55.0-145.0    |      | 49.0-130.0   | 44.0-145.0    |      |
|                                         | Mean (SD)                                          | 100.9 (18.70) | 104.9 (17.38) |      | 98.8 (19.41) | 103.0 (18.11) |      | 101.3 (19.28) | 103.4 (17.43) |      | 91.4 (20.42) | 103.4 (17.83) |      |
| WAIS-IV (>= 16 yrs)                     | Working Memory                                     |               |               | 0.28 |              |               | 0.62 |               |               | 0.90 |              |               | 0.03 |
|                                         | N                                                  | 51            | 41            |      | 11           | 81            |      | 43            | 49            |      | 5            | 87            |      |
|                                         | Min-Max                                            | 49.0-136.0    | 60.0-136.0    |      | 49.0-136.0   | 49.0-136.0    |      | 49.0-136.0    | 63.0-117.0    |      | 49.0-95.0    | 49.0-136.0    |      |
|                                         | Mean (SD)                                          | 96.9 (17.12)  | 94.6 (15.75)  |      | 95.5 (25.76) | 96.0 (15.03)  |      | 96.1 (20.76)  | 95.7 (11.73)  |      | 73.8 (16.39) | 97.2 (15.65)  |      |
| Executive Function                      |                                                    |               |               |      |              |               |      |               |               |      |              |               |      |
| Conners-3 Teacher (< 18 yrs)            | Executive Functioning                              |               |               | 0.79 |              |               | 0.56 |               |               | 0.80 |              |               | 0.09 |
|                                         | N                                                  | 51            | 22            |      | 8            | 65            |      | 33            | 40            |      | 9            | 64            |      |
|                                         | Min-Max                                            | 39.0-74.0     | 39.0-81.0     |      | 40.0-73.0    | 39.0-81.0     |      | 39.0-71.0     | 39.0-81.0     |      | 49.0-71.0    | 39.0-81.0     |      |

|                            |                                     |              |              |      |              |              |      |              |              |       |             |              |      |
|----------------------------|-------------------------------------|--------------|--------------|------|--------------|--------------|------|--------------|--------------|-------|-------------|--------------|------|
|                            | Mean (SD)                           | 54.1 (11.31) | 53.6 (10.36) |      | 57.6 (12.64) | 53.5 (10.76) |      | 53.4 (10.61) | 54.4 (11.36) |       | 58.7 (7.23) | 53.3 (11.27) |      |
| BRIEF-2 Teacher (< 18 yrs) | Global Executive Composite          |              |              | 0.25 |              |              | 0.58 |              |              | 0.88  |             |              | 0.62 |
|                            | N                                   | 59           | 30           |      | 7            | 82           |      | 40           | 49           |       | 10          | 79           |      |
|                            | Min-Max                             | 38.0-87.0    | 40.0-75.0    |      | 47.0-66.0    | 38.0-87.0    |      | 40.0-84.0    | 38.0-87.0    |       | 46.0-73.0   | 38.0-87.0    |      |
|                            | Mean (SD)                           | 55.8 (12.77) | 52.8 (9.64)  |      | 55.6 (7.85)  | 54.7 (12.15) |      | 54.7 (11.48) | 54.9 (12.24) |       | 56.5 (9.96) | 54.6 (12.09) |      |
| Memory                     |                                     |              |              |      |              |              |      |              |              |       |             |              |      |
| WRAML-2 (>= 8 yrs)         | IMMEDIATE Recall: Story Memory      |              |              | 0.16 |              |              | 0.38 |              |              | 0.03  |             |              | 0.24 |
|                            | N                                   | 132          | 85           |      | 25           | 192          |      | 95           | 122          |       | 16          | 201          |      |
|                            | Min-Max                             | 0.0-18.0     | 1.0-19.0     |      | 0.0-16.0     | 0.0-19.0     |      | 0.0-16.0     | 3.0-19.0     |       | 0.0-14.0    | 0.0-19.0     |      |
|                            | Mean (SD)                           | 9.9 (3.56)   | 10.7 (2.96)  |      | 9.8 (3.52)   | 10.3 (3.34)  |      | 9.7 (3.70)   | 10.7 (3.01)  |       | 9.3 (4.00)  | 10.3 (3.30)  |      |
|                            | IMMEDIATE Recall: Picture Memory    |              |              | 0.35 |              |              | 0.41 |              |              | 0.008 |             |              | 0.12 |
|                            | N                                   | 129          | 80           |      | 23           | 186          |      | 93           | 116          |       | 16          | 193          |      |
|                            | Min-Max                             | 0.0-16.0     | 3.0-15.0     |      | 0.0-14.0     | 0.0-16.0     |      | 0.0-14.0     | 3.0-16.0     |       | 0.0-13.0    | 0.0-16.0     |      |
|                            | Mean (SD)                           | 8.3 (3.23)   | 8.8 (2.77)   |      | 7.8 (3.45)   | 8.6 (3.01)   |      | 7.8 (3.13)   | 9.0 (2.91)   |       | 7.4 (3.65)  | 8.6 (3.00)   |      |
|                            | DELAYED Recall: Story Memory Recall |              |              | 0.11 |              |              | 0.53 |              |              | 0.08  |             |              | 0.17 |
|                            | N                                   | 132          | 85           |      | 25           | 192          |      | 95           | 122          |       | 16          | 201          |      |
|                            | Min-Max                             | 0.0-18.0     | 1.0-19.0     |      | 0.0-16.0     | 0.0-19.0     |      | 0.0-16.0     | 1.0-19.0     |       | 0.0-15.0    | 0.0-19.0     |      |
|                            | Mean (SD)                           | 9.9 (3.50)   | 10.8 (3.01)  |      | 10.0 (3.77)  | 10.3 (3.28)  |      | 9.8 (3.77)   | 10.6 (2.92)  |       | 9.3 (4.30)  | 10.3 (3.25)  |      |

|                                              |                                                                        |              |             |      |              |              |      |              |              |      |              |              |      |
|----------------------------------------------|------------------------------------------------------------------------|--------------|-------------|------|--------------|--------------|------|--------------|--------------|------|--------------|--------------|------|
|                                              | DELAYED Recall: Picture Memory Recognition                             |              | 0.89        |      |              |              | 0.34 |              |              | 0.93 |              |              | 0.70 |
|                                              | N                                                                      | 129          | 80          |      | 23           | 186          |      | 93           | 116          |      | 16           | 193          |      |
|                                              | Min-Max                                                                | 0.0-19.0     | 5.0-14.0    |      | 0.0-16.0     | 0.0-19.0     |      | 0.0-19.0     | 1.0-18.0     |      | 0.0-19.0     | 0.0-18.0     |      |
|                                              | Mean (SD)                                                              | 9.3 (3.74)   | 9.5 (2.12)  |      | 8.8 (3.37)   | 9.4 (3.19)   |      | 9.4 (3.59)   | 9.4 (2.89)   |      | 9.2 (5.08)   | 9.4 (3.02)   |      |
| ADOS and SRS                                 |                                                                        |              |             |      |              |              |      |              |              |      |              |              |      |
| Screening classification                     | Composite outcome defined by ADOS-2 and SRS-2 Total Score <sup>1</sup> |              |             | -    |              |              | 0.88 |              |              | 0.21 |              |              | 0.01 |
|                                              | Non Spectrum                                                           | 96 (88.9%)   | 61 (100%)   |      | 18 (90.0%)   | 139 (93.3%)  |      | 73 (91.3%)   | 84 (94.4%)   |      | 10 (71.4%)   | 147 (94.8%)  |      |
|                                              | Autism/Autism Spectrum                                                 | 12 (11.1%)   |             |      | 2 (10.0%)    | 10 (6.7%)    |      | 7 (8.8%)     | 5 (5.6%)     |      | 4 (28.6%)    | 8 (5.2%)     |      |
| Social Responsiveness Scale (SRS) (>= 8 yrs) | SRS-2 Total Score                                                      |              |             | 0.08 |              |              | 0.86 |              |              | 0.94 |              |              | 0.03 |
|                                              | N                                                                      | 123          | 75          |      | 22           | 176          |      | 86           | 112          |      | 15           | 183          |      |
|                                              | Min-Max                                                                | 11.0-99.0    | 36.0-67.0   |      | 36.0-83.0    | 11.0-99.0    |      | 11.0-99.0    | 26.0-87.0    |      | 38.0-99.0    | 11.0-99.0    |      |
|                                              | Mean (SD)                                                              | 51.6 (13.43) | 47.4 (8.10) |      | 50.9 (10.84) | 49.9 (12.00) |      | 49.8 (12.91) | 50.1 (11.03) |      | 57.3 (17.22) | 49.4 (11.16) |      |
| Language Deficits                            |                                                                        |              |             |      |              |              |      |              |              |      |              |              |      |
| WIAT-III (>= 8 yrs)                          | Listening Comprehension                                                |              |             | 0.10 |              |              | 0.64 |              |              | 0.05 |              |              | 0.10 |
|                                              | N                                                                      | 116          | 73          |      | 23           | 166          |      | 88           | 101          |      | 14           | 175          |      |

|                        |                             |               |               |      |               |               |      |               |               |      |               |               |      |
|------------------------|-----------------------------|---------------|---------------|------|---------------|---------------|------|---------------|---------------|------|---------------|---------------|------|
|                        | Min-Max                     | 39.0-133.0    | 61.0-139.0    |      | 39.0-128.0    | 39.0-139.0    |      | 39.0-133.0    | 65.0-139.0    |      | 39.0-126.0    | 39.0-139.0    |      |
|                        | Mean (SD)                   | 102.0 (18.10) | 106.3 (15.22) |      | 100.7 (22.07) | 104.1 (16.38) |      | 100.7 (19.68) | 106.2 (14.16) |      | 96.6 (24.80)  | 104.2 (16.34) |      |
| Adaptive Functioning   |                             |               |               |      |               |               |      |               |               |      |               |               |      |
| Vineland-3 (>= 8 yrs)  | Adaptive Behavior Composite |               |               | 0.67 |               |               | 0.87 |               |               | 0.77 |               |               | 0.23 |
|                        | N                           | 102           | 59            |      | 19            | 142           |      | 75            | 86            |      | 11            | 150           |      |
|                        | Min-Max                     | 56.0-125.0    | 69.0-124.0    |      | 75.0-125.0    | 56.0-124.0    |      | 56.0-125.0    | 60.0-124.0    |      | 56.0-118.0    | 58.0-125.0    |      |
|                        | Mean (SD)                   | 99.8 (14.17)  | 102.7 (11.83) |      | 99.8 (13.63)  | 101.0 (13.40) |      | 100.6 (13.32) | 101.1 (13.53) |      | 94.0 (16.24)  | 101.4 (13.09) |      |
|                        | Motor Skills                |               |               | 0.57 |               |               | 0.90 |               |               | 0.08 |               |               | 0.52 |
|                        | N                           | 26            | 10            |      | 2             | 34            |      | 14            | 22            |      | 4             | 32            |      |
|                        | Min-Max                     | 62.0-118.0    | 81.0-105.0    |      | 89.0-105.0    | 62.0-118.0    |      | 85.0-118.0    | 62.0-111.0    |      | 81.0-111.0    | 62.0-118.0    |      |
|                        | Mean (SD)                   | 97.5 (13.00)  | 95.7 (10.88)  |      | 97.0 (11.31)  | 97.0 (12.54)  |      | 101.2 (9.18)  | 94.4 (13.49)  |      | 102.8 (14.57) | 96.3 (12.09)  |      |
| Anxiety and Depression |                             |               |               |      |               |               |      |               |               |      |               |               |      |
| CDI-2 (< 18 yrs)       | Total T-Score               |               |               | 0.19 |               |               | 0.82 |               |               | 0.10 |               |               | 0.53 |
|                        | N                           | 74            | 38            |      | 14            | 98            |      | 48            | 64            |      | 10            | 102           |      |
|                        | Min-Max                     | 35.0-79.0     | 36.0-74.0     |      | 35.0-79.0     | 35.0-74.0     |      | 35.0-74.0     | 35.0-79.0     |      | 39.0-71.0     | 35.0-79.0     |      |
|                        | Mean (SD)                   | 49.7 (10.23)  | 50.3 (9.86)   |      | 51.0 (12.32)  | 49.8 (9.77)   |      | 48.4 (8.62)   | 51.1 (10.95)  |      | 52.5 (10.00)  | 49.7 (10.09)  |      |

|                                       |                                  |              |              |      |              |              |      |              |              |       |              |              |      |
|---------------------------------------|----------------------------------|--------------|--------------|------|--------------|--------------|------|--------------|--------------|-------|--------------|--------------|------|
| Beck Anxiety Inventory (>= 18 yrs)    | BAI Total Raw Score              |              |              | 0.17 |              |              | 0.19 |              |              | >0.99 |              |              | 0.09 |
|                                       | N                                | 41           | 32           |      | 8            | 65           |      | 37           | 36           |       | 4            | 69           |      |
|                                       | Min-Max                          | 0.0-64.0     | 0.0-56.0     |      | 0.0-64.0     | 0.0-64.0     |      | 0.0-64.0     | 0.0-56.0     |       | 5.0-64.0     | 0.0-64.0     |      |
|                                       | Mean (SD)                        | 13.4 (14.41) | 8.8 (11.66)  |      | 17.8 (19.59) | 10.6 (12.42) |      | 11.9 (14.97) | 10.8 (11.74) |       | 21.3 (28.58) | 10.8 (12.16) |      |
| Beck Depression Inventory (>= 18 yrs) | BDI-2 Total Raw Score            |              |              | 0.18 |              |              | 0.13 |              |              | 0.61  |              |              | 0.07 |
|                                       | N                                | 41           | 32           |      | 8            | 65           |      | 36           | 73           |       | 4            | 69           |      |
|                                       | Min-Max                          | 0.0-64.0     | 0.0-41.0     |      | 2.0-64.0     | 0.0-64.0     |      | 0.0-41.0     | 0.0-64.0     |       | 5.0-64.0     | 0.0-64.0     |      |
|                                       | Mean (SD)                        | 12.2 (14.46) | 7.9 (9.05)   |      | 17.4 (20.83) | 9.4 (11.01)  |      | 9.2 (10.67)  | 10.3 (12.50) |       | 20.0 (29.34) | 9.7 (11.02)  |      |
| ADHD/Attention                        |                                  |              |              |      |              |              |      |              |              |       |              |              |      |
| Conners-3 Parent (< 18 yrs)           | DSM-5 ADHD Hyperactive-Impulsive |              |              | 0.44 |              |              | 0.28 |              |              | 0.11  |              |              | 0.72 |
|                                       | N                                | 76           | 39           |      | 14           | 101          |      | 51           | 64           |       | 11           | 104          |      |
|                                       | Min-Max                          | 0.0-99.0     | 40.0-86.0    |      | 41.0-71.0    | 0.0-99.0     |      | 0.0-99.0     | 40.0-90.0    |       | 40.0-86.0    | 0.0-99.0     |      |
|                                       | Mean (SD)                        | 55.2 (16.71) | 54.7 (13.54) |      | 50.9 (8.46)  | 55.6 (16.34) |      | 53.3 (16.32) | 56.5 (15.07) |       | 55.7 (15.25) | 55.0 (15.76) |      |
| Conners-3 Teacher (< 18 yrs)          | DSM-5 ADHD Hyperactive-Impulsive |              |              | 0.48 |              |              | 0.17 |              |              | 0.11  |              |              | 0.46 |
|                                       | N                                | 51           | 23           |      | 66           | 74           |      | 33           | 41           |       | 9            | 65           |      |

|                                                                                                                                                                                                                                                                                                                                                                                                                                                                                                                                                                                                                                                                                                                                                                                                                                             |                            |              |              |       |              |              |      |              |              |      |              |              |      |
|---------------------------------------------------------------------------------------------------------------------------------------------------------------------------------------------------------------------------------------------------------------------------------------------------------------------------------------------------------------------------------------------------------------------------------------------------------------------------------------------------------------------------------------------------------------------------------------------------------------------------------------------------------------------------------------------------------------------------------------------------------------------------------------------------------------------------------------------|----------------------------|--------------|--------------|-------|--------------|--------------|------|--------------|--------------|------|--------------|--------------|------|
|                                                                                                                                                                                                                                                                                                                                                                                                                                                                                                                                                                                                                                                                                                                                                                                                                                             | Min-Max                    | 42.0-91.0    | 43.0-89.0    |       | 42.0-91.0    | 42.0-91.0    |      | 42.0-87.0    | 42.0-91.0    |      | 43.0-77.0    | 42.0-91.0    |      |
|                                                                                                                                                                                                                                                                                                                                                                                                                                                                                                                                                                                                                                                                                                                                                                                                                                             | Mean (SD)                  | 57.1 (15.58) | 52.6 (11.85) |       | 55.9 (14.78) | 55.7 (14.59) |      | 52.5 (11.71) | 58.2 (16.26) |      | 53.6 (11.67) | 56.0 (15.00) |      |
| Conners' Adult ADHD Rating Scales (>= 18 yrs)                                                                                                                                                                                                                                                                                                                                                                                                                                                                                                                                                                                                                                                                                                                                                                                               | DSM-IV ADHD Symptoms Total |              |              | 0.007 |              |              | 0.45 |              |              | 0.59 |              |              | 0.43 |
|                                                                                                                                                                                                                                                                                                                                                                                                                                                                                                                                                                                                                                                                                                                                                                                                                                             | N                          | 42           | 33           |       | 9            | 66           |      | 37           | 38           |      | 4            | 71           |      |
|                                                                                                                                                                                                                                                                                                                                                                                                                                                                                                                                                                                                                                                                                                                                                                                                                                             | Min-Max                    | 32.0-91.0    | 31.0-85.0    |       | 35.0-91.0    | 31.0-91.0    |      | 32.0-91.0    | 31.0-85.0    |      | 41.0-91.0    | 31.0-91.0    |      |
|                                                                                                                                                                                                                                                                                                                                                                                                                                                                                                                                                                                                                                                                                                                                                                                                                                             | Mean (SD)                  | 55.5 (15.36) | 46.6 (12.29) |       | 54.9 (20.13) | 51.2 (13.93) |      | 52.8 (15.12) | 50.5 (14.38) |      | 55.5 (23.74) | 51.4 (14.25) |      |
| <p>*Normative values: The normative mean score is 100 and standard deviation (SD) is 15 for all tests with these exceptions: Behavior Rating Inventory of Executive Function, Second Edition (BRIEF-2)<sup>26</sup>, Children's Depression Index, Second Edition (CDI-2), Conners' Scales, Multidimensional Anxiety Scale for Children, Second Edition (MASC-2) has mean 50, SD 10); Delis-Kaplan Executive Function System (D-KEFS) has mean 10, SD 3)<sup>27</sup>; Social Responsiveness Scale, Second Edition (SRS-2) reports T-score ≥ 76 for severe symptoms, 66-75 for moderate, 60-65 for mild, and &lt; 60 typical<sup>28</sup>; Beck Anxiety Inventory (BAI) and Beck Depression Inventory, Second Edition (BDI-II) score 30-63 for severe symptoms, 17-29 for moderate, 10-16 for mild, and 0-9 for minimal<sup>29,30</sup>.</p> |                            |              |              |       |              |              |      |              |              |      |              |              |      |

eFigure 1. Patient enrollment flow diagram.

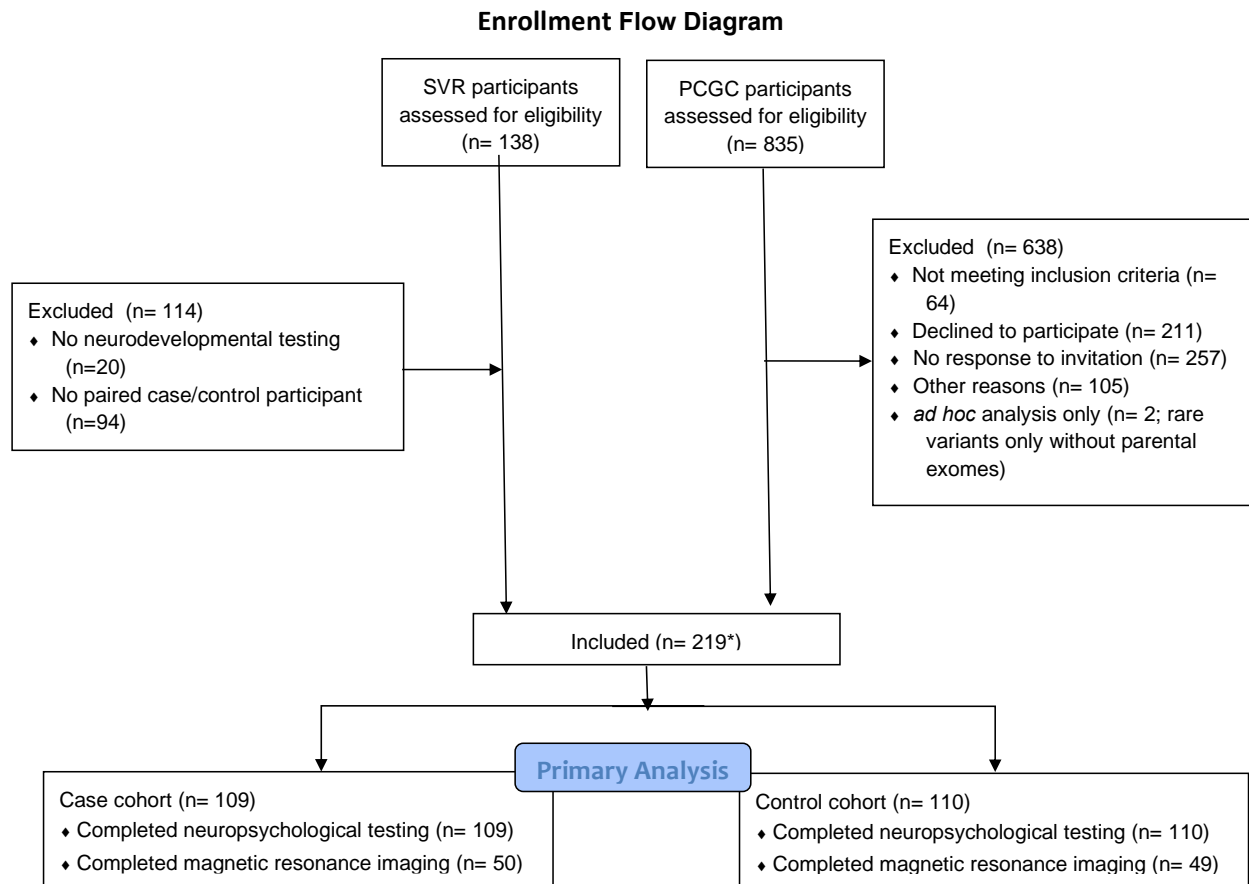

\*All 211 included in *ad hoc* analysis based on rare *de novo* or inherited predicted loss-of-function variants

eFigure 2. Venn diagram of shared genes between the four gene lists used in the *ad hoc* analysis.

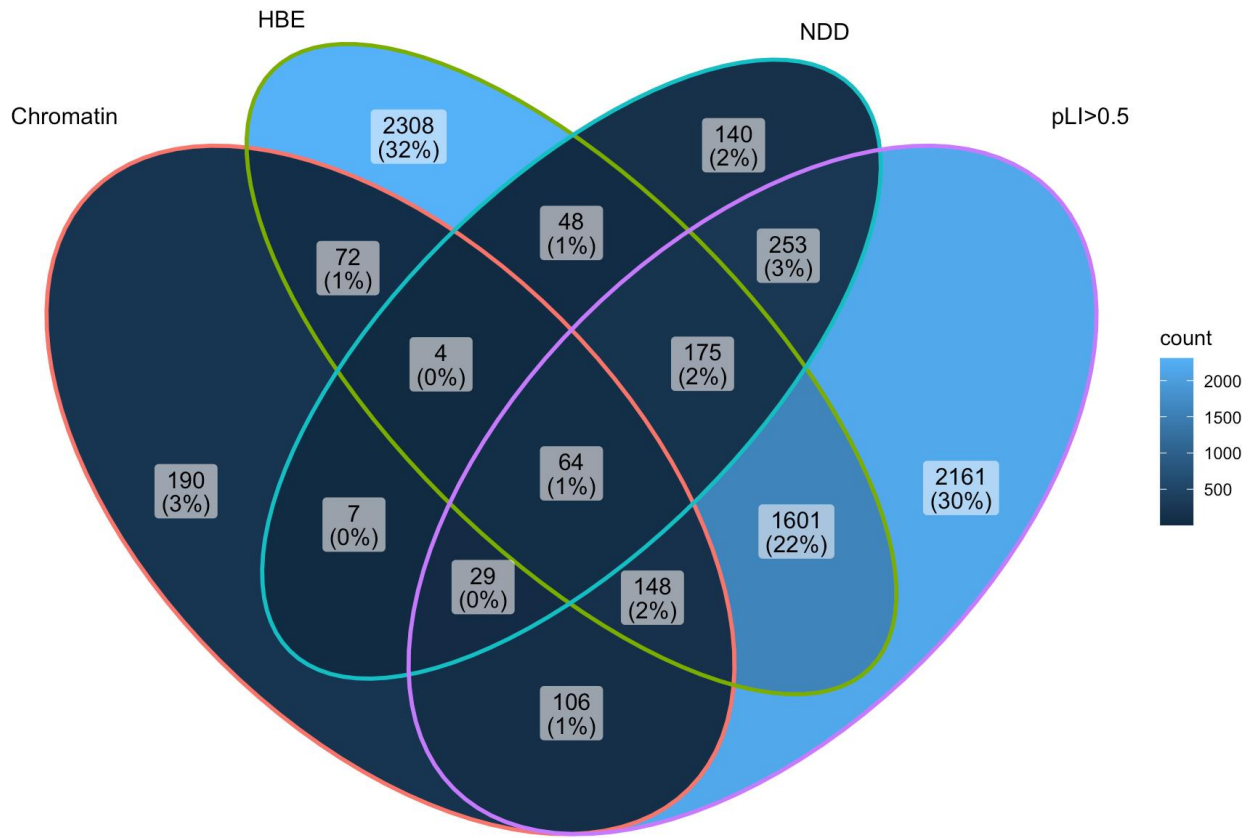



## eMethods

### *Study Population*

Among 613 eligible PCGC participants, 197 consented to the study (97 cases, 98 controls, and 2 controls with singleton ES included only in the rare variant analysis; Supplemental Figure 1, Supplemental Table 1). SVR subjects had undergone neurodevelopmental testing and trio exome sequencing (ES) in the parent study; our analysis included 12 with dDNVs and 12 SVR controls without such variants.

### *Determination of Heterozygous Status*

Genomic results for the PCGC participants included ES (n=188), genome sequencing (GS; n=67 who also had ES), and molecular inversion probe sequencing (MIPS; 9 participants). A dDNV-NA was defined as a *de novo* coding variant in a gene not associated with risk of NDD<sup>1</sup> that was predicted to be damaging based on a MetaSVM rankscore > 0.83 on available genomic analysis<sup>2,3</sup> (Supplemental Table 2). Case participants were selected based on the absence of dDNV-NAs. Analysis of dDNV-NAs in GS data did not change the case/control status of any participants. The nine PCGC participants classified as cases by MIPS were also studied by singleton (participant-only) exome sequencing to ensure the absence of other pathogenic variants. Two control PCGC participants had singleton exome sequencing and therefore were only included in rare variant analyses.

In *post-hoc* analysis, dDNV or rare pLOF variants from cases and controls were identified in ES data as previously described<sup>3,4</sup>. Each participant (case or control) was re-categorized based on presence or absence of a rare (allele frequency <  $1 \times 10^{-5}$  in gnomAD) pLOF variant in a chromatin gene (620 genes), high brain-expressed (HBE) gene (upper quartile of mouse brain expression at E14.5<sup>2</sup>, 4420 genes), constrained gene with probability of intolerance to loss (pLI) > 0.5 in gnomAD 2.0 cohort (high pLI, 4543 genes), or gene known to be associated with risk of NDD (based on literature review through April 2017; 720 genes, Supplemental Tables 3-4). The number of participants with pLOF heterozygous status in genes from four non-mutually exclusive categories were: chromatin modifying (n = 16), HBE (n = 132), high pLI (n = 95) or NDD (n = 25). The other participants were not heterozygous in each category. As participants with a dDNV-NA in a gene known to be associated with risk of NDD at the time of the study launch were excluded from enrollment, the only NDD gene variants present in the cohort were 1) transmitted from parents, 2) single variants in genes with recessive disease mechanisms, and/or 3) not known to be associated with NDD at the time of enrollment. Twenty pLOF variants in NDD risk genes were inherited from a parent (five were single variants in NDD risk genes with recessive disease mechanism, while 15 were in genes with autosomal dominant mechanism); three were pLOF dDNV-NAs in genes with an autosomal recessive mechanism of disease (CAD, MYO5A, and SBF1); and two were pLOF dDNV-NAs in genes newly associated with NDD risk after study enrollment began (COL6A1 and TBX18).

### *Neuropsychological Testing*

**Academic Achievement:** All participants completed the Wide Range Achievement Test 4 (WRAT4), a norm-referenced, examiner-administered test that measures the basic academic skills of word reading, sentence comprehension, spelling, and math computation<sup>5</sup>. The WRAT4 was standardized on a representative national sample of over 3,000 individuals ranging in age from 5 to 94 years. Scores have a mean of 100 and standard deviation of 15.

**Intelligence:** Participants under 16 years of age completed the norm-referenced, examiner-administered Wechsler Intelligence Scale for Children, Fifth Edition (WISC-V)<sup>6</sup>. Scores were calculated for the Full Scale Intelligent Quotient (FSIQ), Verbal Comprehension Index, Fluid Reasoning Index, and Processing Speed Index. For participants 16 years or older, the norm-referenced, examiner-administered Wechsler Adult Intelligent Scale, Fourth Edition (WAIS-IV)<sup>7</sup> was used. The WAIS-IV generates an FSIQ as well as Verbal Comprehension, Perceptual Reasoning, Working Memory, and Processing Speed Index scores. The mean of the WISC-V and WAIS-IV is 100, and the standard deviation is 15.

**Learning and Attention:** Participants, parents and teachers of all participants < 18 years old completed a Conners-3 multi-informant questionnaire measure of Attention-Deficit/Hyperactivity Disorder (ADHD) and its most common associated conditions in children and adolescents<sup>8</sup>. Symptom scales measure domains including, but not limited to: learning problems, DSM-V inattentive symptoms, DSM-V hyperactive-impulsive symptoms. Participants over the age of 18 years completed the Conners' Adult ADHD Rating Scales (CAARS), a self-report questionnaire. The CAARS yields scores including DSM-IV Total ADHD symptoms. Scores on the Conners-3 and CAARS domains are presented as T-scores with a mean of 50 and a standard deviation of 10.

Executive Function: Parents and teachers of all participants < 18 years old completed the Behavior Rating Inventory of Executive Function, Second Edition (BRIEF-2)<sup>9</sup>, which measures executive skills functioning. The Global Executive Composite score was used in the current study. Executive function was also assessed with the Conners-3 questionnaires completed by parents and teachers for participants < 18 years old<sup>8</sup>. BRIEF-2 and Conners-3 scores are presented as T-scores, which have a mean of 50 and a standard deviation of 10. All participants completed selected subtests of the norm-referenced, examiner-administered Delis-Kaplan Executive Function System (D-KEFS)<sup>10</sup>, which measures overall executive functioning. The specific subtests used were the Tower test (planning and inhibition of impulsive behavior; Total Achievement Score) and Verbal Fluence-Category Switching (cognitive flexibility, set-shifting; Total Accuracy score). The mean is 10, and the standard deviation is 3.

Memory: All participants completed selected subtests of the norm-referenced, examiner-administered Wide Range Assessment of Memory and Learning, Second Edition (WRAML2)<sup>11</sup>. The Story Memory subtest measures the ability to remember contextual verbal information both immediately (independent recall) and after a brief (approx. 15 minute) delay (independent recall and cued recognition). The Picture Memory subtest assesses the ability to remember visual stimuli, both immediately and with delay. The mean is 100, and the standard deviation is 15.

Social Cognition: Parents administered the Social Responsiveness Scale, Second Edition (SRS-2)<sup>12</sup>, a questionnaire. The SRS-2 measures social awareness and cognition, social communication, social motivation, and repetitive/stereotypic behavior that are characteristic of an autism spectrum disorder. The SRS-2 scale is measured via T-score, with a T score of 76 or higher indicating severe symptom presence associated with an autism spectrum disorder, T scores of 66-75 indicate a moderate symptom presence, T scores of 60-65 reflect a mild symptom presence, and a T score of 59 or lower indicates functioning that is age typical. Participants who obtained a T score at or above 60 went on to be evaluated with the examiner-administered Autism Diagnostic Observation Schedule, Second Edition (ADOS-2)<sup>13</sup>, a test that allows for the assessment and diagnosis of autism spectrum disorders across age, developmental level, and language skills. There are four primary modules used for the age group included in the current study. Across the four modules, there is no mean or standard deviation; thus, cutoff scores are utilized to determine the potential for an autism spectrum disorder. Peer relations were also assessed with Conners-3 questionnaires completed by parents and teachers of participants < 18 years old.

Language: All participants completed the norm-referenced, examiner-administered Wechsler Individual Achievement Test, Third Edition (WIAT-III)<sup>14</sup>, Oral Language Component; included subtests were listening comprehension, oral expression and oral language. The mean is 100, and the standard deviation is 15.

Fine Motor: All participants completed the examiner-administered Beery-Buktenica Developmental Test of Visual Motor Integration Test, Sixth Edition (BEERYBEERY VMI)<sup>15</sup>, which measures the extent to which individuals can integrate their visual and motor abilities. The mean is 100, and the standard deviation is 15.

Adaptive Functioning: All parents of participants completed the Vineland Adaptive Behavior Scales, Third Edition (Vineland-3)<sup>16</sup>, which measures the adaptive functioning to assess whether subjects perform their activities of daily living at an age appropriate level. Five components were included – Adaptive Behavior Composite, as well as the four indices: Communication, Daily Living, Socialization, and Motor skills. The mean of the Vineland-3 is 100, and the standard deviation is 15.

Anxiety: Parents of participants < 18 years old completed the Multidimensional Anxiety Scale for Children, Second Edition (MASC-2)<sup>17</sup>, which measures children's level of overall anxiety as well as subscale scores. MASC-2 scores have a mean of 50 and a standard deviation of 10. For participants 18 years or older, the Beck Anxiety Inventory (BAI)<sup>18</sup>, a self-report inventory, was administered. The BAI is measured via a cut off score. There is no mean and standard deviation, but cut-off scores are used to determine the severity of anxiety symptoms: minimal, 0-9; mild, 10-16; moderate, 17-29; severe 30-63.

Depression: Parents of participants < 18 years old completed the Children's Depression Index, Second Edition (CDI-2)<sup>19</sup> to measure depressive symptoms in children. The CDI-2 assesses for both emotional problems and functional problems related to depressive symptomology. The CDI-2 is reported in T-scores, with a mean of 50 and a standard deviation of 10. Participants 18 years or older completed the Beck Depression Inventory, Second Edition

(BDI-II)<sup>20</sup>, a self-report measure of depression. Scores on the BDI-II are tallied and compared to cut-off scores that indicate the level of severity of depression: minimal, 0-13; mild, 14-19; moderate, 20-28; severe, 29-63.

### MRI Acquisition

The following is a brief description of those methods, as detailed previously. A small number of changes to the processing pipeline as described previously are indicated with footnotes. Magnetic resonance imaging was performed on either Siemens Prisma (two sites) or Prisma Fit (three sites), or General Electric MR750 (two sites). 32 channel head coils were used on all but one Prisma fit scanner, which used a 64 channel head coil. A standard scan session included sMRI series (T<sub>1</sub>w and T<sub>2</sub>w), one dMRI series, and four rs-fMRI series, in the following order: localizer, 3D T<sub>1</sub>-weighted images, 2 runs of resting state fMRI, diffusion weighted images, 3D T<sub>2</sub>-weighted images, and 2 runs of resting state fMRI. Scan sessions typically required ~50 minutes to complete. The T<sub>1</sub>w acquisition (1 mm isotropic) is a 3D T<sub>1</sub>w inversion prepared RF-spoiled gradient echo scan using prospective motion correction (Tisdall, et al., 2012; White, et al., 2010). The T<sub>2</sub>w acquisition (1 mm isotropic) is a 3D T<sub>2</sub>w variable flip angle fast spin echo scan, also using prospective motion correction. Prospective motion correction has not been implemented for the dMRI or fMRI acquisition. The dMRI acquisition (1.7 mm isotropic) uses multiband EPI (Moeller, et al., 2010; Setsompop, et al., 2012) with slice acceleration factor 3 and includes 96 diffusion directions, seven b=0 frames, and four b-values (6 directions with b=500 s/mm<sup>2</sup>, 15 directions with b=1000 s/mm<sup>2</sup>, 15 directions with b=2000 s/mm<sup>2</sup>, and 60 directions with b=3000 s/mm<sup>2</sup>). The fMRI acquisitions (2.4 mm isotropic, TR=800 ms) also use multiband EPI with slice acceleration factor 6. Each of the dMRI and fMRI acquisition blocks include spin-echo EPI fieldmap scans for B<sub>0</sub> distortion correction. The imaging protocol was developed in collaboration with each scanner manufacturer using commercially available system upgrades, and where possible, product sequences. Imaging parameters were made as similar as possible across scanner manufacturers, although some hardware and software constraints were unavoidable (for details, see Image acquisition parameters).

| Siemens   | Matrix    | Slices    | FOV       | % FOV phase | Resolution (mm) | TR (ms)         | TE (ms) | TI (ms) | Flip Angle (deg) | Parallel Imaging | MultiBand Acceleration | Phase partial Fourier | Diffusion Directions | b-values              | Acquisition Time |
|-----------|-----------|-----------|-----------|-------------|-----------------|-----------------|---------|---------|------------------|------------------|------------------------|-----------------------|----------------------|-----------------------|------------------|
|           | T1        | 256 x 256 | 176       | 256 x 256   | 100%            | 1.0 x 1.0 x 1.0 | 2500    | 2.88    | 1060             | 8                | 2x                     | Off                   | Off                  | N/A                   | N/A              |
| T2        | 256 x 256 | 176       | 256 x 256 | 100%        | 1.0 x 1.0 x 1.0 | 3200            | 565     | N/A     | Variable         | 2x               | Off                    | Off                   | N/A                  | N/A                   | 6:35             |
| Diffusion | 140 x 140 | 81        | 240 x 240 | 100%        | 1.7 x 1.7 x 1.7 | 4100            | 88      | N/A     | 90               | Off              | 3                      | 6/8                   | 96                   | 500, 1000, 2000, 3000 | 7:31             |
| fMRI      | 90 x 90   | 60        | 216 x 216 | 100%        | 2.4 x 2.4 x 2.4 | 800             | 30      | N/A     | 52               | Off              | 6                      | Off                   | N/A                  | N/A                   | 5:00             |

  

| GE        | Matrix    | Slices    | FOV       | % FOV phase | Resolution (mm) | TR (ms)         | TE (ms) | TI (ms) | Flip Angle (deg) | Parallel Imaging | MultiBand Acceleration | Phase partial Fourier | Diffusion Directions | b-values              | Acquisition Time |
|-----------|-----------|-----------|-----------|-------------|-----------------|-----------------|---------|---------|------------------|------------------|------------------------|-----------------------|----------------------|-----------------------|------------------|
|           | T1        | 256 x 256 | 208       | 256 x 256   | 100%            | 1.0 x 1.0 x 1.0 | 2500    | 2       | 1060             | 8                | 2x                     | Off                   | Off                  | N/A                   | N/A              |
| T2        | 256 x 256 | 208       | 256 x 256 | 100%        | 1.0 x 1.0 x 1.0 | 3200            | 60      | N/A     | Variable         | 2x               | Off                    | Off                   | N/A                  | N/A                   | 5:50             |
| Diffusion | 140 x 140 | 81        | 240 x 240 | 100%        | 1.7 x 1.7 x 1.7 | 4100            | 81.9    | N/A     | 90               | Off              | 3                      | 5.5/8                 | 96                   | 500, 1000, 2000, 3000 | 7:30             |
| fMRI      | 90 x 90   | 60        | 216 x 216 | 100%        | 2.4 x 2.4 x 2.4 | 800             | 30      | N/A     | 52               | Off              | 6                      | Off                   | N/A                  | N/A                   | 5:00             |

**Image acquisition parameters.** Scanner models: Siemens Prisma VE11B-C. GE MR759 DV25-26. For dMRI acquisition, number of diffusion directions for each b-value: 500 (6-dirs), 1000 (15-dirs) 2000 (15-dirs), 3000 (60-dirs).

### Data Transfer and Initial Quality Control

Imaging data in DICOM format were packaged as tgz files, sent electronically from participating sites to the MRI Core, and automatically categorized into the different types of imaging series: T<sub>1</sub>w, T<sub>2</sub>w, dMRI, and rs-fMRI. Using web-based REDCap reports, MRI Core staff identified participants with missing data, and worked with sites to facilitate data transfer if needed. DICOM files were extracted from the tgz files received at the MRI Core<sup>1</sup> and then reviewed for problems such as incorrect acquisition parameters, imaging artifacts, or corrupted data files, using a combination of automated and manual methods. Automated protocol compliance checks providing information about the completeness of the imaging series and the adherence to the intended imaging parameters. Automated quality control procedures include the calculation of metrics such as signal-to-noise ratio (SNR) and head motion statistics. Trained technicians visually reviewed image series for poor image quality, noting various imaging artifacts and flagging unacceptable data, typically those with the most severe artifacts or irregularities. All

<sup>1</sup> Offline reconstruction of multiband EPI data from raw k-space files into DICOM files was performed for dMRI and fMRI data collected on a GE scanner with software version DV25, using software supplied by GE. In late 2018, GE scanners were upgraded to software version DV26, supporting online reconstruction of multiband data and providing DICOM files.

series were consensus rated by two or more reviewers. Series rejected based on data quality criteria were excluded from subsequent processing and analysis. T1w and T2w images for each participant were reviewed by a neuroradiologist who recorded the number, approximate size, and general location of focal infarcts, number and location of foci of low or high T2w signal, and other abnormalities.

### *sMRI Processing and Analysis*

T<sub>1</sub>w and T<sub>2</sub>w structural images were corrected for gradient nonlinearity distortions, and T<sub>2</sub>w images were registered to T<sub>1</sub>w images using mutual information (Jovicich, et al., 2006; Wald, et al., 2001). Intensity inhomogeneity correction was performed by applying smoothly varying bias fields estimated using sparse spatial smoothing and white matter segmentation, with the assumption of uniform T<sub>1</sub>w (or T<sub>2</sub>w) intensity values within white matter (Hagler, et al., 2019). Images were rigidly registered and resampled into alignment with an averaged reference brain in standard space. Manual quality control (QC) performed prior to full image processing was used to exclude poor-quality structural scans or select one for processing in the case of multiple acceptable scans of a given type.

Cortical surface reconstruction and subcortical segmentation were performed using FreeSurfer (Fischl, 2012) (version 5.3), a software package validated for use in children (Ghosh, et al., 2010) and used successfully in large pediatric studies (Jernigan, et al., 2016; Levman, et al., 2017). The T<sub>2</sub>w MRI volumes were not used in the cortical surface reconstruction and subcortical segmentation. Subcortical structures were labeled using automated, atlas-based, volumetric segmentation procedure (Fischl, et al., 2002). Labels for cortical gray matter and underlying white matter voxels were assigned based on cortical folding patterns and Bayesian classification rules for two standard parcellation schemes (Desikan, et al., 2006; Destrieux, et al., 2010). Fuzzy-cluster parcellations based on genetic correlation of surface area were used to calculate averages of cortical surface measures for each parcel (Chen, et al., 2012). Functionally-defined parcels based on resting-state correlations in fMRI (Gordon, et al., 2016) were resampled from atlas-space to individual subject-space and used for resting-state fMRI analysis. Morphometric measures include cortical thickness (Fischl and Dale, 2000; Rimol, et al., 2010), area (Chen, et al., 2012; Joyner, et al., 2009), volume, and sulcal depth (Fischl, et al., 1999). Image intensity measures include T<sub>1</sub>w, T<sub>2</sub>w, and T<sub>1</sub>w and T<sub>2</sub>w cortical contrast (Westlye, et al., 2009). Cortical contrast was calculated as the normalized difference of gray versus white matter, sampled at a distance of  $\pm 0.2$  mm relative to the gray-white boundary.

To ensure the quality of derived measures trained technicians reviewed the accuracy of cortical surface reconstruction. For each cortical surface reconstruction reviewers gauged the severity of five categories of image artifact or reconstruction inaccuracy: motion, intensity inhomogeneity, white matter underestimation, pial overestimation, and magnetic susceptibility artifact. The reviewers assigned an overall QC score indicating whether the cortical surface reconstruction is recommended for use (1) or recommended for exclusion (0). Exclusion was recommended if any of the five categories were rated as severe.

### *dMRI Processing and Analysis*

Preprocessing of dMRI series included corrections for eddy current distortions, head motion, B<sub>0</sub> distortion, and gradient nonlinearity distortion. A model-based approach based on diffusion gradient orientations and amplitudes was used to correct for eddy current distortions (Zhuang, et al., 2006), with corrections limited to displacement along the phase-encode direction (Andersson and Sotiropoulos, 2016; Barnett, et al., 2014; Rohde, et al., 2004; Zhuang, et al., 2006). To correct images for head motion, we rigid-body-registered each frame to the corresponding volume synthesized from a robust tensor fit, accounting for image contrast variation between frames. Dark slices caused by abrupt head motion were replaced with values synthesized from the robust tensor fit, and the diffusion gradient matrix was adjusted for head rotation. Spatial and intensity distortions caused by B<sub>0</sub> field inhomogeneity were minimized using FSL's TOPUP<sup>2</sup>, a robust and accurate tool for reducing spatial and intensity distortions in EPI images that relies on reversing phase-encode polarities (Andersson, et al., 2003; Chang and Fitzpatrick, 1992; Holland, et al., 2010; Morgan, et al., 2004). Gradient nonlinearity distortions were then corrected for each frame (Jovicich, et al., 2006). The b=0 dMRI images were registered to T<sub>1</sub>w structural images using mutual information (Wells, et al., 1996), after coarse pre-alignment via within-modality registration to atlas brains. dMRI images were then resampled in a standard orientation (relative to the T<sub>1</sub>w image rigidly registered to an atlas) with 1.7 mm isotropic resolution (equal to the dMRI acquisition resolution).

---

<sup>2</sup> Note that this differs from the description in Hagler et al., 2019. The previous tool for estimation of B<sub>0</sub> distortion was replaced with FSL's TOPUP, which provides more accurate B<sub>0</sub> distortion correction, particularly in the presence of head motion between forward and reverse phase-encode polarity scans. This change is consistent with ABCD Release 3.0.

Several measures related to microstructural tissue properties were calculated using Diffusion Tensor Imaging (DTI) (Basser, et al., 1994; Basser and Pierpaoli, 1996) and Restriction Spectrum Imaging (RSI) (White, et al., 2013a; White, et al., 2014; White, et al., 2013b). The DTI full shell model (DTI<sub>FS</sub>) was calculated using all gradient strengths/shells (6 directions at  $b=500$  s/mm<sup>2</sup>, 15 directions at  $b=1000$  s/mm<sup>2</sup>, 15 directions at  $b=2000$  s/mm<sup>2</sup>, and 60 directions at  $b=3000$  s/mm<sup>2</sup>). The DTI inner shell (DTI<sub>IS</sub>) model fit was calculated with high b-value frames excluded (leaving 6 directions at  $b=500$  s/mm<sup>2</sup> and 15 directions at  $b=1000$  s/mm<sup>2</sup>) so that derived diffusivity measures better correspond to traditional single-b-value acquisitions. Measures derived from each DTI model included fractional anisotropy (FA), mean diffusivity (MD), longitudinal diffusivity (LD), and transverse diffusivity (TD). We use RSI to model mixtures of “restricted”, “hindered”, and “free” diffusion within individual voxels<sup>3</sup>. The signal fractions representing restricted (e.g., intracellular) and hindered (e.g., extracellular) diffusion were modeled as fourth order spherical harmonic, fiber orientation density (FOD) functions. For both fractions, the LD is modeled as  $1 \times 10^{-3}$  mm<sup>2</sup>/s. For the restricted fraction, TD is modelled as 0. For the hindered fraction, TD is modelled as  $0.9 \times 10^{-3}$  mm<sup>2</sup>/s. The free water fraction was modeled as isotropic diffusion with an apparent diffusion coefficient (ADC) of  $3.0 \times 10^{-3}$  mm<sup>2</sup>/s. Measures derived from this RSI model fit included restricted normalized isotropic (RNI), restricted normalized directional (RND), restricted normalized total (RNT), hindered normalized isotropic (HNI), hindered normalized directional (HND), and hindered normalized total (HNT), and free normalized isotropic (FNI)<sup>4</sup>. These normalized RSI measures are unitless and range from 0 to 1.

Mean DTI and RSI measures were calculated for white matter fiber tract ROIs created with AtlasTrack (Hagler, et al., 2009; Hagler, et al., 2019), ROIs derived from FreeSurfer’s automated subcortical segmentation (Fischl, et al., 2002), and cortical surface parcellations (Desikan, et al., 2006; Destrieux, et al., 2010), for cortical gray matter and white matter adjacent to the cortex (Elman, et al., 2017). Visual inspection of dMRI data after processing involved the comparison of RSI-derived RND images to corresponding co-registered T<sub>1</sub>w images. Two reviewers rated each dMRI series based on residual B<sub>0</sub> distortion, registration to the T<sub>1</sub>w image, image quality, segmentation integrity, and field of view (FOV) cutoff, and gave an overall pass-fail QC rating. Exclusion was recommended if any of the four categories were rated as severe.

### *fMRI Processing and Analysis*

Preprocessing of fMRI series included corrections for head motion using AFNI’s 3dvolreg (Cox, 1996), B<sub>0</sub> distortion correction using FSL’s TOPUP2 (Andersson, et al., 2003), and gradient nonlinearity distortion correction (Jovicich, et al., 2006). The displacement field for B<sub>0</sub> distortion correction was estimated from spin-echo calibration scans with reversing phase-encode polarities and applied to each gradient-echo fMRI series. Between-scan motion was corrected through image registration to a mid-session reference scan and resampling with cubic interpolation. Processed fMRI images remained in “native-space”, with 2.4 mm isotropic resolution. Registration between the spin-echo B<sub>0</sub> calibration scans and T<sub>1</sub>w structural images was performed using mutual information (Wells, et al., 1996), with coarse pre-alignment based on within-modality registration to atlas brains.

Measures of functional connectivity were computed using a seed-based correlational approach (Van Dijk, et al., 2010), adapted for cortical surface-based analysis (Seibert and Brewer, 2011). Additional processing steps included the removal of initial frames and normalization by the mean across time. Linear regression to remove quadratic trends, signals correlated with estimated motion time courses, and the mean time courses of cerebral white matter, ventricles, and whole brain, as well as their first derivatives (Power, et al., 2014; Satterthwaite, et al., 2012). Estimated motion time courses were temporally filtered to attenuate signals linked to respiration (Fair, et al., 2018). Frames with displacement (FD) greater than 0.3 mm were excluded from the regression (Power, et al., 2014). After regression and residualization, values for censored frames were replaced through linear interpolation<sup>5</sup>, and time courses were band-pass filtered between 0.009 and 0.08 Hz (Hallquist, et al., 2013).

---

<sup>3</sup> Note that this differs from the RSI model described in Hagler et al., 2019, which included only restricted and hindered fractions. The addition of a free water fraction is consistent with the upcoming ABCD Release 4.0.

<sup>4</sup> Note that these abbreviations differ from those used in Hagler et al., 2019. RNI and HNI were previously called N0 and N0\_s2, respectively. RND and HND were previously called ND and ND\_s2. RNT and HNT were previously called NT and NT\_s2. FNI was not previously included.

<sup>5</sup> Note that this differs from the rs-fMRI preprocessing described in Hagler et al., 2019. Specifically, the linear interpolation step, which prevents motion contamination in the subsequent band-pass filtering, was previously omitted. The inclusion of this step is consistent with the upcoming ABCD Release 4.0.

Preprocessed time courses were projected onto the cortical surface for each individual subject by sampling cortical gray matter voxels 1 mm from the gray/white boundary. Average time courses were calculated for cortical surface-based ROIs using FreeSurfer's anatomically-defined parcellations (Desikan, et al., 2006; Destrieux, et al., 2010) and a functionally-defined parcellation based on resting-state functional connectivity patterns (Gordon, et al., 2016), resampled from atlas-space to individual subject-space. Average time courses were also calculated for subcortical ROIs (Fischl, et al., 2002).

Variance across time was calculated for each ROI, a measure that reflects the magnitude of low frequency oscillations. Correlation values were calculated for each pair of ROIs, Fisher transformed to z-statistics, and averaged within or between networks to provide summary measures of network correlation strength (Van Dijk, et al., 2010). Average correlations within and between networks defined in the Gordon parcellation were calculated as the average of the Fisher-transformed correlations for each unique pairwise combination of ROIs belonging to each network. Average correlations were also calculated for correlation between each network and each subcortical gray matter ROI.

Motion censoring was used to reduce residual effects of head motion (Power, et al., 2012; Power, et al., 2014). Time points with FD greater than 0.2 mm were excluded from the variance and correlation calculations. Time periods with fewer than five contiguous sub-threshold time points were also excluded, and an additional round of censoring was applied based on outliers with respect to spatial variation across the brain. ROI variance and network correlation values were averaged across rs-fMRI runs, weighted by the number of frames per run remaining after motion censoring. Runs with fewer than 100 usable time points (out of 375 acquired) were excluded from the average.

Visual inspection of fMRI data after processing involved the comparison to corresponding co-registered T<sub>1</sub>w images. Two reviewers rated each participant's fMRI images, averaged across all series, based on residual B<sub>0</sub> distortion, registration to the T<sub>1</sub>w image, image quality, and field of view (FOV) cutoff, and gave an overall pass-fail QC rating. Exclusion was recommended if any of the four categories were rated as severe.

## REFERENCES

1. McKusick-Nathans Institute of Genetic Medicine JHU. Online Mendelian Inheritance in Man, OMIM®. <https://omim.org/>
2. Homsy J, Zaidi S, Shen Y, et al. De novo mutations in congenital heart disease with neurodevelopmental and other congenital anomalies. *Science* (80- ). 2015;350(6265):1262-1266. doi:10.1126/science.aac9396
3. Jin SC, Homsy J, Zaidi S, et al. Contribution of rare inherited and de novo variants in 2,871 congenital heart disease probands. *Nat Genet.* 2017;49(11):1593-1601. doi:10.1038/ng.3970
4. Morton SU, Shimamura A, Newburger PE, et al. Association of Damaging Variants in Genes with Increased Cancer Risk among Patients with Congenital Heart Disease. *JAMA Cardiol.* Published online October 21, 2020. doi:10.1001/jamacardio.2020.4947
5. Wilkinson G, Robertson G. *Wide Range Achievement Test 4 Professional Manual.* Psychological Assessment Resources; 2006.
6. Wechsler D. *WISC-V Wechsler Intelligence Scale for Children - Fifth Ed.* 5th ed. Psychological Corporation; 2014.
7. Wechsler D. *Wechsler Adult Intelligence Scale--Fourth Edition (WAIS-IV).* Pearson; 2008.
8. Conners C. *Conners 3rd Edition (Conners 3).* 3rd ed. Pearson Clinical; 2008.
9. Gioia G, Isquith P, Guy S, Kenworthy L. Behavior Rating Inventory of Executive Function Second Edition. In: 2nd ed. Psychological Assessment Resources; 2015.
10. Baron IS. *Delis-Kaplan Executive Function System.* Vol 10. (Kaplan E, Kramer JH, Corporation P, eds.). Psychological Assessment Resources Inc; 2004.
11. Sheslow D, Adams W. *WRAML2 Wide Range Assessment of Memory & Learning Second Edition.* Wide Range; 2003.
12. Constantino J. *Social Responsiveness Scale, Second Edition.* Western Psychological Services; 2012.
13. Lord C, Rutter M, Dilavore P, Risi S, Gotham K, Bishop S. *Autism Diagnostic Observation Schedule, Second Edition.* Western Psychological Services; 2012.
14. Wechsler D. *Wechsler Individual Achievement Test.* Second Edi. The Psychological Corporation; 2009.
15. Beery K, Buktenica N, Beery N. *Beery-Buktenica Visual-Motor Integration Sixth Edition.* Pearson; 2010.
16. Sparrow S, Cicchetti D, Saulnier C. *Vineland Adaptive Behavior Scales Third Edition.* 3rd ed. Pearson; 2016.

17. March JS. *Multidimensional Anxiety Scale for Children: Third Edition*. 3rd ed. Multi-Health Systems; 2013.
18. Beck A. *Beck Anxiety Inventory*. Psychological Corporation; 1993.
19. Kovacs M. *Children's Depression Inventory Second Edition*. 2nd ed. Multi-Health Systems; 2011.
20. Beck A, Steer R, Brown G. *Beck Depression Inventory Second Edition*. 2nd ed. Harcourt; 1996.
