# Supplementary material for: Association of Potentially Damaging De Novo Gene Variants With Neurologic Outcomes in Congenital Heart Disease
Source: PubMed Central journal article supplement (PMC9880793; doi:10.1001/jamanetworkopen.2022.53191), 2023-01-26
Supplement: jamanetwopen-e2253191-s002.pdf [file jamanetwopen-e2253191-s002.pdf]

## Data Sharing Statement

Morton. Association of Potentially Damaging De Novo Gene Variants With Neurologic Outcomes in Congenital Heart Disease. *JAMA Netw Open*. Published January 26, 2023. doi:10.1001/jamanetworkopen.2022.53191

### Data

**Data available:** No

### Additional Information

**Explanation for why data not available:** Additional information available to qualified investigators upon application to the Pediatric Cardiac Genomics Consortium.
